# Supplementary material for: A vast collection of microbial genes that are toxic to bacteria
Source: HighWire-hosted journal article supplement (doi:10.1101/gr.133850.111), 2012-02-01
Supplement: TableS1.xlsx [file TableS1.xlsx]

## Sheet: uncAndDecGenes
Organism	NCBI taxon id	Replicon accession	locus tag	Protein product	p-value for coverage reduction	Clonability	COG ID
Anaeromyxobacter dehalogenans 2CP-1	455488	NC_011891	A2cp1_0095	Phosphomethylpyrimidine kinase	4.58496e-08	decreased coverage	COG0351
Anaeromyxobacter dehalogenans 2CP-1	455488	NC_011891	A2cp1_0148	type IV pilus assembly PilZ	0.00847782	decreased coverage	\N
Anaeromyxobacter dehalogenans 2CP-1	455488	NC_011891	A2cp1_0188	transglutaminase domain protein	0.00321272	decreased coverage	\N
Anaeromyxobacter dehalogenans 2CP-1	455488	NC_011891	A2cp1_0269	RDD domain containing protein	0.00578779	decreased coverage	COG1714
Anaeromyxobacter dehalogenans 2CP-1	455488	NC_011891	A2cp1_0281	methylmalonyl-CoA mutase, large subunit	0.0034305	decreased coverage	COG1884
Anaeromyxobacter dehalogenans 2CP-1	455488	NC_011891	A2cp1_0826	heat shock protein DnaJ domain protein	3.40576e-06	decreased coverage	\N
Anaeromyxobacter dehalogenans 2CP-1	455488	NC_011891	A2cp1_0907	pyridoxamine 5'-phosphate oxidase-related FMN-binding	6.20808e-10	unclonable	COG0748
Anaeromyxobacter dehalogenans 2CP-1	455488	NC_011891	A2cp1_1019	protein of unknown function DUF1469	0.00635959	decreased coverage	\N
Anaeromyxobacter dehalogenans 2CP-1	455488	NC_011891	A2cp1_1020	DNA polymerase LigD, polymerase domain protein	0.00719502	decreased coverage	COG3285
Anaeromyxobacter dehalogenans 2CP-1	455488	NC_011891	A2cp1_1254	carbonic anhydrase	2.71417e-08	decreased coverage	COG0288
Anaeromyxobacter dehalogenans 2CP-1	455488	NC_011891	A2cp1_1351	hypothetical protein	0.00995959	decreased coverage	\N
Anaeromyxobacter dehalogenans 2CP-1	455488	NC_011891	A2cp1_1399	FHA domain containing protein	0.00835094	decreased coverage	\N
Anaeromyxobacter dehalogenans 2CP-1	455488	NC_011891	A2cp1_1435	Thiamine-phosphate diphosphorylase	0.00770563	decreased coverage	COG0352
Anaeromyxobacter dehalogenans 2CP-1	455488	NC_011891	A2cp1_1436	Methyltransferase type 11	0.00774998	decreased coverage	COG2226
Anaeromyxobacter dehalogenans 2CP-1	455488	NC_011891	A2cp1_1466	hypothetical protein	0.0028691	decreased coverage	\N
Anaeromyxobacter dehalogenans 2CP-1	455488	NC_011891	A2cp1_1467	PHP domain protein	0.00774998	decreased coverage	COG0613
Anaeromyxobacter dehalogenans 2CP-1	455488	NC_011891	A2cp1_1501	Sua5/YciO/YrdC/YwlC family protein	0.000418868	decreased coverage	COG0009
Anaeromyxobacter dehalogenans 2CP-1	455488	NC_011891	A2cp1_1502	hypothetical protein	0.00218363	decreased coverage	COG4198
Anaeromyxobacter dehalogenans 2CP-1	455488	NC_011891	A2cp1_1603	TonB family protein	0.00363915	decreased coverage	COG1629
Anaeromyxobacter dehalogenans 2CP-1	455488	NC_011891	A2cp1_1699	protein of unknown function DUF1468	0.00744952	decreased coverage	\N
Anaeromyxobacter dehalogenans 2CP-1	455488	NC_011891	A2cp1_1700	hypothetical protein	0.00489273	decreased coverage	COG5552
Anaeromyxobacter dehalogenans 2CP-1	455488	NC_011891	A2cp1_1812	RNA polymerase, sigma-24 subunit, ECF subfamily	1.25061e-05	decreased coverage	COG1595
Anaeromyxobacter dehalogenans 2CP-1	455488	NC_011891	A2cp1_1813	putative transmembrane anti-sigma factor	2.68109e-05	decreased coverage	COG5662
Anaeromyxobacter dehalogenans 2CP-1	455488	NC_011891	A2cp1_1929	Methyltransferase type 11	2.45244e-05	decreased coverage	COG2226
Anaeromyxobacter dehalogenans 2CP-1	455488	NC_011891	A2cp1_1930	serine/threonine protein kinase	6.4129e-05	decreased coverage	COG0515
Anaeromyxobacter dehalogenans 2CP-1	455488	NC_011891	A2cp1_2118	MJ0042 family finger-like protein	0.000277169	decreased coverage	\N
Anaeromyxobacter dehalogenans 2CP-1	455488	NC_011891	A2cp1_2271	hypothetical protein	0.00292445	decreased coverage	\N
Anaeromyxobacter dehalogenans 2CP-1	455488	NC_011891	A2cp1_2272	protein of unknown function DUF59	0.00578779	decreased coverage	COG0489
Anaeromyxobacter dehalogenans 2CP-1	455488	NC_011891	A2cp1_2314	Pyrrolo-quinoline quinone	0.00748637	decreased coverage	COG1520
Anaeromyxobacter dehalogenans 2CP-1	455488	NC_011891	A2cp1_2421	4Fe-4S ferredoxin iron-sulfur binding domain protein	0.00281921	decreased coverage	COG1146
Anaeromyxobacter dehalogenans 2CP-1	455488	NC_011891	A2cp1_2422	preprotein translocase, SecG subunit	0.00340269	decreased coverage	COG1314
Anaeromyxobacter dehalogenans 2CP-1	455488	NC_011891	A2cp1_2423	triosephosphate isomerase	0.00789739	decreased coverage	COG0149
Anaeromyxobacter dehalogenans 2CP-1	455488	NC_011891	A2cp1_2528	Peptidase M1 membrane alanine aminopeptidase	0.00982821	decreased coverage	COG0308
Anaeromyxobacter dehalogenans 2CP-1	455488	NC_011891	A2cp1_2560	flagellar motor switch protein FliG	0.00224788	decreased coverage	COG1536
Anaeromyxobacter dehalogenans 2CP-1	455488	NC_011891	A2cp1_2561	flagellar assembly protein FliH	0.00219056	decreased coverage	COG1317
Anaeromyxobacter dehalogenans 2CP-1	455488	NC_011891	A2cp1_2595	flagellar biosynthesis protein FlhA	0.00863118	decreased coverage	COG1298
Anaeromyxobacter dehalogenans 2CP-1	455488	NC_011891	A2cp1_2596	GTP-binding signal recognition particle SRP54 G- domain protein	0.00656754	decreased coverage	COG1419
Anaeromyxobacter dehalogenans 2CP-1	455488	NC_011891	A2cp1_2613	hypothetical protein	2.74645e-07	decreased coverage	\N
Anaeromyxobacter dehalogenans 2CP-1	455488	NC_011891	A2cp1_2614	hypothetical protein	2.37412e-07	decreased coverage	\N
Anaeromyxobacter dehalogenans 2CP-1	455488	NC_011891	A2cp1_2615	flagellin domain protein	1.13225e-07	decreased coverage	COG1344
Anaeromyxobacter dehalogenans 2CP-1	455488	NC_011891	A2cp1_2630	Radical SAM domain protein	0.00181244	decreased coverage	COG2896
Anaeromyxobacter dehalogenans 2CP-1	455488	NC_011891	A2cp1_2685	transcriptional regulator, CarD family	0.000114953	decreased coverage	COG1329
Anaeromyxobacter dehalogenans 2CP-1	455488	NC_011891	A2cp1_2702	phosphoribosylaminoimidazole synthetase	0.00227816	decreased coverage	COG0150
Anaeromyxobacter dehalogenans 2CP-1	455488	NC_011891	A2cp1_2703	phosphoribosylglycinamide formyltransferase	0.00267955	decreased coverage	COG0299
Anaeromyxobacter dehalogenans 2CP-1	455488	NC_011891	A2cp1_2765	H+transporting two-sector ATPase C (AC39) subunit	0.00018825	decreased coverage	COG1527
Anaeromyxobacter dehalogenans 2CP-1	455488	NC_011891	A2cp1_2773	CheA signal transduction histidine kinase	0.00107192	decreased coverage	COG0643
Anaeromyxobacter dehalogenans 2CP-1	455488	NC_011891	A2cp1_2836	hypothetical protein	0.00989169	decreased coverage	\N
Anaeromyxobacter dehalogenans 2CP-1	455488	NC_011891	A2cp1_2853	cysteine synthase A	4.34249e-05	decreased coverage	COG0031
Anaeromyxobacter dehalogenans 2CP-1	455488	NC_011891	A2cp1_2855	hypothetical protein	6.91986e-05	decreased coverage	\N
Anaeromyxobacter dehalogenans 2CP-1	455488	NC_011891	A2cp1_2856	hypothetical protein	0.00658326	decreased coverage	\N
Anaeromyxobacter dehalogenans 2CP-1	455488	NC_011891	A2cp1_2918	CheW protein	0.00571645	decreased coverage	COG0835
Anaeromyxobacter dehalogenans 2CP-1	455488	NC_011891	A2cp1_2919	general secretion pathway protein-related protein	0.00976352	decreased coverage	COG3267
Anaeromyxobacter dehalogenans 2CP-1	455488	NC_011891	A2cp1_3043	hydrogenase maturation protease	0.000605484	decreased coverage	COG0680
Anaeromyxobacter dehalogenans 2CP-1	455488	NC_011891	A2cp1_3044	protein of unknown function UPF0153	0.0010524	decreased coverage	\N
Anaeromyxobacter dehalogenans 2CP-1	455488	NC_011891	A2cp1_3045	protein of unknown function DUF224 cysteine-rich region domain protein	0.00467666	decreased coverage	COG0247
Anaeromyxobacter dehalogenans 2CP-1	455488	NC_011891	A2cp1_3137	histidine kinase	0.00554367	decreased coverage	COG0642
Anaeromyxobacter dehalogenans 2CP-1	455488	NC_011891	A2cp1_3191	hypothetical protein	0.00498047	decreased coverage	\N
Anaeromyxobacter dehalogenans 2CP-1	455488	NC_011891	A2cp1_3293	Peptidase M1 membrane alanine aminopeptidase	0.00996699	decreased coverage	COG0308
Anaeromyxobacter dehalogenans 2CP-1	455488	NC_011891	A2cp1_3485	FG-GAP repeat protein	0.00301004	decreased coverage	\N
Anaeromyxobacter dehalogenans 2CP-1	455488	NC_011891	A2cp1_3760	hypothetical protein	3.61746e-06	decreased coverage	\N
Anaeromyxobacter dehalogenans 2CP-1	455488	NC_011891	A2cp1_3791	FHA domain containing protein	1.34808e-06	decreased coverage	COG1716
Anaeromyxobacter dehalogenans 2CP-1	455488	NC_011891	A2cp1_3811	type I citrate synthase	0.00120684	decreased coverage	COG0372
Anaeromyxobacter dehalogenans 2CP-1	455488	NC_011891	A2cp1_3928	tRNA (guanine-N(7)-)-methyltransferase	0.00397463	decreased coverage	COG0220
Anaeromyxobacter dehalogenans 2CP-1	455488	NC_011891	A2cp1_4017	hypothetical protein	0.00574371	decreased coverage	\N
Anaeromyxobacter dehalogenans 2CP-1	455488	NC_011891	A2cp1_4018	RNA polymerase, sigma-24 subunit, ECF subfamily	0.00745227	decreased coverage	COG1595
Anaeromyxobacter dehalogenans 2CP-1	455488	NC_011891	A2cp1_4059	protein of unknown function DUF1302	0.00304001	decreased coverage	\N
Anaeromyxobacter dehalogenans 2CP-1	455488	NC_011891	A2cp1_4097	MCP methyltransferase, CheR-type	5.95426e-06	decreased coverage	COG1352
Anaeromyxobacter dehalogenans 2CP-1	455488	NC_011891	A2cp1_4098	CheW protein	1.9346e-06	decreased coverage	COG0835
Anaeromyxobacter dehalogenans 2CP-1	455488	NC_011891	A2cp1_4117	Uracil-DNA glycosylase superfamily	0.00101771	decreased coverage	COG1573
Anaeromyxobacter dehalogenans 2CP-1	455488	NC_011891	A2cp1_4170	hypothetical protein	0.00792981	decreased coverage	\N
Anaeromyxobacter dehalogenans 2CP-1	455488	NC_011891	A2cp1_4180	MaoC domain protein dehydratase	0.00128585	decreased coverage	COG2030
Anaeromyxobacter dehalogenans 2CP-1	455488	NC_011891	A2cp1_4198	Indole-3-glycerol-phosphate synthase	0.00333421	decreased coverage	COG0134
Anaeromyxobacter dehalogenans 2CP-1	455488	NC_011891	A2cp1_4199	Phosphoribosylanthranilate isomerase	0.000908275	decreased coverage	COG0135
Anaeromyxobacter dehalogenans 2CP-1	455488	NC_011891	A2cp1_4217	dihydrodipicolinate synthase	0.00266238	decreased coverage	COG0329
Anaeromyxobacter dehalogenans 2CP-1	455488	NC_011891	A2cp1_4234	hypothetical protein	0.00410202	decreased coverage	\N
Anaeromyxobacter dehalogenans 2CP-1	455488	NC_011891	A2cp1_4241	oligopeptide transporter, OPT superfamily	0.00336098	decreased coverage	COG1297
Anaeromyxobacter dehalogenans 2CP-1	455488	NC_011891	A2cp1_4253	aminotransferase class I and II	0.00377555	decreased coverage	COG0079
Anaeromyxobacter dehalogenans 2CP-1	455488	NC_011891	A2cp1_4382	histidine kinase	0.00540034	decreased coverage	COG4191
Anaeromyxobacter dehalogenans 2CP-1	455488	NC_011891	A2cp1_R0032	tRNA-Leu	0.00179393	decreased coverage	\N
Prochlorococcus marinus str. AS9601	146891	NC_008816	A9601_00151	heat shock protein GrpE	0.00526535	decreased coverage	COG0576
Prochlorococcus marinus str. AS9601	146891	NC_008816	A9601_00271	4-hydroxythreonine-4-phosphate dehydrogenase	0.00317118	decreased coverage	COG1995
Prochlorococcus marinus str. AS9601	146891	NC_008816	A9601_02011	diacylglycerol kinase	0.00560763	decreased coverage	COG0818
Prochlorococcus marinus str. AS9601	146891	NC_008816	A9601_02021	para-aminobenzoate synthase component II	0.00337855	decreased coverage	COG0512
Prochlorococcus marinus str. AS9601	146891	NC_008816	A9601_04721	putative ABC transporter, oligopeptides	0.0069399	decreased coverage	COG1173
Prochlorococcus marinus str. AS9601	146891	NC_008816	A9601_07431	NAD-dependent DNA ligase N-terminus	0.000724415	decreased coverage	COG0272
Prochlorococcus marinus str. AS9601	146891	NC_008816	A9601_07441	hypothetical protein	0.00334447	decreased coverage	\N
Prochlorococcus marinus str. AS9601	146891	NC_008816	A9601_07451	hypothetical protein	0.00327723	decreased coverage	\N
Prochlorococcus marinus str. AS9601	146891	NC_008816	A9601_07461	hypothetical protein	0.00321128	decreased coverage	\N
Prochlorococcus marinus str. AS9601	146891	NC_008816	A9601_08051	hypothetical protein	0.00183812	decreased coverage	\N
Prochlorococcus marinus str. AS9601	146891	NC_008816	A9601_08921	urease accessory protein UreD	0.00733999	decreased coverage	COG0829
Prochlorococcus marinus str. AS9601	146891	NC_008816	A9601_09581	Alkyl hydroperoxide reductase/ Thiol specific antioxidant/ Mal allergens family protein	0.00769007	decreased coverage	COG1225
Prochlorococcus marinus str. AS9601	146891	NC_008816	A9601_12791	hypothetical protein	0.00229985	decreased coverage	\N
Prochlorococcus marinus str. AS9601	146891	NC_008816	A9601_15411	phosphoribosylglycinamide synthetase	0.000363118	decreased coverage	COG0151
Alicyclobacillus acidocaldarius subsp. acidocaldarius DSM 446	521098	NC_013205	Aaci_0017	hypothetical protein	9.60613e-05	decreased coverage	\N
Alicyclobacillus acidocaldarius subsp. acidocaldarius DSM 446	521098	NC_013205	Aaci_0071	hypothetical protein	0.000941053	decreased coverage	\N
Alicyclobacillus acidocaldarius subsp. acidocaldarius DSM 446	521098	NC_013205	Aaci_0095	hypothetical protein	0.000254666	decreased coverage	\N
Alicyclobacillus acidocaldarius subsp. acidocaldarius DSM 446	521098	NC_013205	Aaci_0174	4-diphosphocytidyl-2C-methyl-D-erythritolkinase	0.00151194	decreased coverage	COG1947
Alicyclobacillus acidocaldarius subsp. acidocaldarius DSM 446	521098	NC_013205	Aaci_0208	transcription elongation factor GreA	1.82043e-07	decreased coverage	COG0782
Alicyclobacillus acidocaldarius subsp. acidocaldarius DSM 446	521098	NC_013205	Aaci_0209	lysyl-tRNA synthetase	1.64497e-07	unclonable	COG1190
Alicyclobacillus acidocaldarius subsp. acidocaldarius DSM 446	521098	NC_013205	Aaci_0379	chaperonin Cpn10	9.45621e-09	unclonable	COG0234
Alicyclobacillus acidocaldarius subsp. acidocaldarius DSM 446	521098	NC_013205	Aaci_0402	protein of unknown function DUF6 transmembrane	8.93438e-07	decreased coverage	COG5006
Alicyclobacillus acidocaldarius subsp. acidocaldarius DSM 446	521098	NC_013205	Aaci_0406	protein of unknown function DUF214	0.00446449	decreased coverage	COG2177
Alicyclobacillus acidocaldarius subsp. acidocaldarius DSM 446	521098	NC_013205	Aaci_0472	transcriptional regulator, XRE family	9.1739e-09	unclonable	COG1476
Alicyclobacillus acidocaldarius subsp. acidocaldarius DSM 446	521098	NC_013205	Aaci_0473	hypothetical protein	6.86024e-09	unclonable	\N
Alicyclobacillus acidocaldarius subsp. acidocaldarius DSM 446	521098	NC_013205	Aaci_0474	hypothetical protein	5.28795e-09	unclonable	\N
Alicyclobacillus acidocaldarius subsp. acidocaldarius DSM 446	521098	NC_013205	Aaci_0475	hypothetical protein	7.2142e-09	unclonable	\N
Alicyclobacillus acidocaldarius subsp. acidocaldarius DSM 446	521098	NC_013205	Aaci_0480	type III restriction protein res subunit	9.16808e-06	decreased coverage	COG1061
Alicyclobacillus acidocaldarius subsp. acidocaldarius DSM 446	521098	NC_013205	Aaci_0481	hypothetical protein	9.16528e-08	decreased coverage	\N
Alicyclobacillus acidocaldarius subsp. acidocaldarius DSM 446	521098	NC_013205	Aaci_0482	hypothetical protein	1.78511e-07	decreased coverage	\N
Alicyclobacillus acidocaldarius subsp. acidocaldarius DSM 446	521098	NC_013205	Aaci_0558	hypothetical protein	6.67131e-08	unclonable	\N
Alicyclobacillus acidocaldarius subsp. acidocaldarius DSM 446	521098	NC_013205	Aaci_0678	short-chain dehydrogenase/reductase SDR	1.1557e-08	unclonable	COG4221
Alicyclobacillus acidocaldarius subsp. acidocaldarius DSM 446	521098	NC_013205	Aaci_0679	Extradiol ring-cleavage dioxygenase class III protein subunit B	2.47428e-08	unclonable	COG3384
Alicyclobacillus acidocaldarius subsp. acidocaldarius DSM 446	521098	NC_013205	Aaci_0758	Methyltransferase type 11	0.00287175	decreased coverage	COG2226
Alicyclobacillus acidocaldarius subsp. acidocaldarius DSM 446	521098	NC_013205	Aaci_0799	2-methylcitrate dehydratase	0.0023431	decreased coverage	COG2079
Alicyclobacillus acidocaldarius subsp. acidocaldarius DSM 446	521098	NC_013205	Aaci_0823	FMN-binding negative transcriptional regulator	0.00293061	decreased coverage	COG2808
Alicyclobacillus acidocaldarius subsp. acidocaldarius DSM 446	521098	NC_013205	Aaci_0923	Histidine--tRNA ligase	0.00438339	decreased coverage	COG0124
Alicyclobacillus acidocaldarius subsp. acidocaldarius DSM 446	521098	NC_013205	Aaci_1007	DNA repair nucleotidyltransferase/DNA polymerase-like protein	3.70586e-06	decreased coverage	COG0389
Alicyclobacillus acidocaldarius subsp. acidocaldarius DSM 446	521098	NC_013205	Aaci_1065	transcriptional regulator, XRE family	0.00304407	decreased coverage	\N
Alicyclobacillus acidocaldarius subsp. acidocaldarius DSM 446	521098	NC_013205	Aaci_1071	hypothetical protein	0.00220808	decreased coverage	\N
Alicyclobacillus acidocaldarius subsp. acidocaldarius DSM 446	521098	NC_013205	Aaci_1072	hypothetical protein	0.00264429	decreased coverage	\N
Alicyclobacillus acidocaldarius subsp. acidocaldarius DSM 446	521098	NC_013205	Aaci_1080	type III restriction protein res subunit	8.86806e-05	decreased coverage	COG1061
Alicyclobacillus acidocaldarius subsp. acidocaldarius DSM 446	521098	NC_013205	Aaci_1081	RNA polymerase, sigma 28 subunit, FliA/WhiG subfamily	1.651e-06	decreased coverage	COG1191
Alicyclobacillus acidocaldarius subsp. acidocaldarius DSM 446	521098	NC_013205	Aaci_1082	hypothetical protein	5.71629e-07	decreased coverage	\N
Alicyclobacillus acidocaldarius subsp. acidocaldarius DSM 446	521098	NC_013205	Aaci_1083	\N	4.89555e-07	decreased coverage	\N
Alicyclobacillus acidocaldarius subsp. acidocaldarius DSM 446	521098	NC_013205	Aaci_1084	hypothetical protein	5.0318e-07	decreased coverage	\N
Alicyclobacillus acidocaldarius subsp. acidocaldarius DSM 446	521098	NC_013205	Aaci_1085	hypothetical protein	4.59218e-07	decreased coverage	\N
Alicyclobacillus acidocaldarius subsp. acidocaldarius DSM 446	521098	NC_013205	Aaci_1086	hypothetical protein	6.55014e-07	decreased coverage	\N
Alicyclobacillus acidocaldarius subsp. acidocaldarius DSM 446	521098	NC_013205	Aaci_1087	DNA polymerase III, beta subunit	7.22327e-06	decreased coverage	COG0592
Alicyclobacillus acidocaldarius subsp. acidocaldarius DSM 446	521098	NC_013205	Aaci_1088	hypothetical protein	5.56159e-07	decreased coverage	\N
Alicyclobacillus acidocaldarius subsp. acidocaldarius DSM 446	521098	NC_013205	Aaci_1089	hypothetical protein	1.42718e-06	decreased coverage	\N
Alicyclobacillus acidocaldarius subsp. acidocaldarius DSM 446	521098	NC_013205	Aaci_1123	transcriptional regulator, ArsR family	2.69044e-07	decreased coverage	COG0640
Alicyclobacillus acidocaldarius subsp. acidocaldarius DSM 446	521098	NC_013205	Aaci_1124	\N	1.89143e-07	decreased coverage	\N
Alicyclobacillus acidocaldarius subsp. acidocaldarius DSM 446	521098	NC_013205	Aaci_1200	hypothetical protein	8.82868e-06	decreased coverage	\N
Alicyclobacillus acidocaldarius subsp. acidocaldarius DSM 446	521098	NC_013205	Aaci_1201	AIG2 family protein	2.20206e-07	decreased coverage	\N
Alicyclobacillus acidocaldarius subsp. acidocaldarius DSM 446	521098	NC_013205	Aaci_1215	extracellular solute-binding protein family 1	6.4062e-06	decreased coverage	COG1653
Alicyclobacillus acidocaldarius subsp. acidocaldarius DSM 446	521098	NC_013205	Aaci_1216	binding-protein-dependent transport systems inner membrane component	2.28392e-06	decreased coverage	COG1175
Alicyclobacillus acidocaldarius subsp. acidocaldarius DSM 446	521098	NC_013205	Aaci_1217	binding-protein-dependent transport systems inner membrane component	1.78765e-06	decreased coverage	COG0395
Alicyclobacillus acidocaldarius subsp. acidocaldarius DSM 446	521098	NC_013205	Aaci_1218	glycoside hydrolase family 2 TIM barrel	0.000962199	decreased coverage	COG3250
Alicyclobacillus acidocaldarius subsp. acidocaldarius DSM 446	521098	NC_013205	Aaci_1233	Haloacid dehalogenase domain protein hydrolase	0.00126511	decreased coverage	COG0546
Alicyclobacillus acidocaldarius subsp. acidocaldarius DSM 446	521098	NC_013205	Aaci_1246	Rhodanese domain protein	0.000851542	decreased coverage	COG0607
Alicyclobacillus acidocaldarius subsp. acidocaldarius DSM 446	521098	NC_013205	Aaci_1247	thioredoxin	0.000845354	decreased coverage	COG3118
Alicyclobacillus acidocaldarius subsp. acidocaldarius DSM 446	521098	NC_013205	Aaci_1255	protein of unknown function DUF1292	0.000140212	decreased coverage	\N
Alicyclobacillus acidocaldarius subsp. acidocaldarius DSM 446	521098	NC_013205	Aaci_1355	16S rRNA processing protein RimM	1.16768e-08	unclonable	COG0806
Alicyclobacillus acidocaldarius subsp. acidocaldarius DSM 446	521098	NC_013205	Aaci_1356	tRNA (guanine-N1)-methyltransferase	2.65451e-08	unclonable	COG0336
Alicyclobacillus acidocaldarius subsp. acidocaldarius DSM 446	521098	NC_013205	Aaci_1418	hypothetical protein	0.000757039	decreased coverage	\N
Alicyclobacillus acidocaldarius subsp. acidocaldarius DSM 446	521098	NC_013205	Aaci_1419	ribosomal protein S2	3.75862e-05	decreased coverage	COG0052
Alicyclobacillus acidocaldarius subsp. acidocaldarius DSM 446	521098	NC_013205	Aaci_1430	GTP-binding protein TypA	0.000885386	decreased coverage	COG1217
Alicyclobacillus acidocaldarius subsp. acidocaldarius DSM 446	521098	NC_013205	Aaci_1431	protein of unknown function DUF150	1.99616e-05	decreased coverage	COG0779
Alicyclobacillus acidocaldarius subsp. acidocaldarius DSM 446	521098	NC_013205	Aaci_1460	beta-lactamase domain protein	1.7363e-05	decreased coverage	COG0595
Alicyclobacillus acidocaldarius subsp. acidocaldarius DSM 446	521098	NC_013205	Aaci_1472	DEAD/DEAH box helicase domain protein	4.40496e-07	unclonable	COG0513
Alicyclobacillus acidocaldarius subsp. acidocaldarius DSM 446	521098	NC_013205	Aaci_1473	recA protein	1.12388e-07	unclonable	COG0468
Alicyclobacillus acidocaldarius subsp. acidocaldarius DSM 446	521098	NC_013205	Aaci_1500	DNA polymerase III, epsilon subunit	1.53009e-08	unclonable	COG0847
Alicyclobacillus acidocaldarius subsp. acidocaldarius DSM 446	521098	NC_013205	Aaci_1541	\N	3.30462e-06	decreased coverage	\N
Alicyclobacillus acidocaldarius subsp. acidocaldarius DSM 446	521098	NC_013205	Aaci_1542	hypothetical protein	8.12437e-07	decreased coverage	\N
Alicyclobacillus acidocaldarius subsp. acidocaldarius DSM 446	521098	NC_013205	Aaci_1598	thioesterase superfamily protein	1.42015e-07	decreased coverage	COG2050
Alicyclobacillus acidocaldarius subsp. acidocaldarius DSM 446	521098	NC_013205	Aaci_1666	phospho-2-dehydro-3-deoxyheptonate aldolase	1.06955e-06	decreased coverage	COG2876
Alicyclobacillus acidocaldarius subsp. acidocaldarius DSM 446	521098	NC_013205	Aaci_1703	RNA binding S1 domain protein	2.41805e-06	decreased coverage	COG0539
Alicyclobacillus acidocaldarius subsp. acidocaldarius DSM 446	521098	NC_013205	Aaci_1714	hypothetical protein	6.95208e-08	decreased coverage	\N
Alicyclobacillus acidocaldarius subsp. acidocaldarius DSM 446	521098	NC_013205	Aaci_1715	UvrD/REP helicase	3.56586e-06	decreased coverage	COG0210
Alicyclobacillus acidocaldarius subsp. acidocaldarius DSM 446	521098	NC_013205	Aaci_1832	hypothetical protein	0.00111515	decreased coverage	\N
Alicyclobacillus acidocaldarius subsp. acidocaldarius DSM 446	521098	NC_013205	Aaci_1846	trigger factor	3.27269e-06	decreased coverage	COG0544
Alicyclobacillus acidocaldarius subsp. acidocaldarius DSM 446	521098	NC_013205	Aaci_1847	non-canonical purine NTP pyrophosphatase, rdgB/HAM1 family	3.01722e-07	decreased coverage	COG0127
Alicyclobacillus acidocaldarius subsp. acidocaldarius DSM 446	521098	NC_013205	Aaci_2033	arsenate reductase (thioredoxin)	0.00780291	decreased coverage	COG0394
Alicyclobacillus acidocaldarius subsp. acidocaldarius DSM 446	521098	NC_013205	Aaci_2052	Propionyl-CoA carboxylase	0.00336851	decreased coverage	COG4799
Alicyclobacillus acidocaldarius subsp. acidocaldarius DSM 446	521098	NC_013205	Aaci_2172	translation initiation factor IF-3	8.64988e-06	decreased coverage	COG0290
Alicyclobacillus acidocaldarius subsp. acidocaldarius DSM 446	521098	NC_013205	Aaci_2180	xylose isomerase	0.000174675	decreased coverage	COG2115
Alicyclobacillus acidocaldarius subsp. acidocaldarius DSM 446	521098	NC_013205	Aaci_2197	cold-shock DNA-binding domain protein	1.06738e-07	decreased coverage	COG1278
Alicyclobacillus acidocaldarius subsp. acidocaldarius DSM 446	521098	NC_013205	Aaci_2210	hypothetical protein	0.00461361	decreased coverage	COG3212
Alicyclobacillus acidocaldarius subsp. acidocaldarius DSM 446	521098	NC_013205	Aaci_2212	Rhomboid family protein	0.00605445	decreased coverage	COG0705
Alicyclobacillus acidocaldarius subsp. acidocaldarius DSM 446	521098	NC_013205	Aaci_2258	extracellular solute-binding protein family 5	7.52385e-07	unclonable	COG0747
Alicyclobacillus acidocaldarius subsp. acidocaldarius DSM 446	521098	NC_013205	Aaci_2378	transcriptional repressor CodY	5.94267e-07	decreased coverage	COG4465
Alicyclobacillus acidocaldarius subsp. acidocaldarius DSM 446	521098	NC_013205	Aaci_2491	extracellular solute-binding protein family 5	1.17082e-06	unclonable	COG0747
Alicyclobacillus acidocaldarius subsp. acidocaldarius DSM 446	521098	NC_013205	Aaci_2544	hypothetical protein	1.82738e-05	decreased coverage	\N
Alicyclobacillus acidocaldarius subsp. acidocaldarius DSM 446	521098	NC_013205	Aaci_2645	protein of unknown function DUF81	0.000890995	decreased coverage	COG0730
Alicyclobacillus acidocaldarius subsp. acidocaldarius DSM 446	521098	NC_013205	Aaci_2662	protein of unknown function DUF322	7.16199e-06	decreased coverage	COG1302
Alicyclobacillus acidocaldarius subsp. acidocaldarius DSM 446	521098	NC_013205	Aaci_2684	30S ribosomal protein S4	0.000106865	decreased coverage	COG0522
Alicyclobacillus acidocaldarius subsp. acidocaldarius DSM 446	521098	NC_013205	Aaci_2685	30S ribosomal protein S11	0.000312441	decreased coverage	COG0100
Alicyclobacillus acidocaldarius subsp. acidocaldarius DSM 446	521098	NC_013205	Aaci_2686	30S ribosomal protein S13	0.000961805	decreased coverage	COG0099
Alicyclobacillus acidocaldarius subsp. acidocaldarius DSM 446	521098	NC_013205	Aaci_2711	50S ribosomal protein L3	3.99657e-06	decreased coverage	COG0087
Alicyclobacillus acidocaldarius subsp. acidocaldarius DSM 446	521098	NC_013205	Aaci_2712	ribosomal protein S10	1.60608e-06	decreased coverage	COG0051
Alicyclobacillus acidocaldarius subsp. acidocaldarius DSM 446	521098	NC_013205	Aaci_2713	translation elongation factor Tu	1.52961e-05	decreased coverage	COG0050
Alicyclobacillus acidocaldarius subsp. acidocaldarius DSM 446	521098	NC_013205	Aaci_2736	PilT protein domain protein	8.48618e-08	unclonable	COG4956
Alicyclobacillus acidocaldarius subsp. acidocaldarius DSM 446	521098	NC_013205	Aaci_2746	CDP-diacylglycerol/glycerol-3-phosphate3- phospha tidyltransferase	1.68146e-06	decreased coverage	COG0558
Alicyclobacillus acidocaldarius subsp. acidocaldarius DSM 446	521098	NC_013205	Aaci_2782	transcription termination factor Rho	4.23025e-06	decreased coverage	COG1158
Alicyclobacillus acidocaldarius subsp. acidocaldarius DSM 446	521098	NC_013205	Aaci_2844	sulfate ABC transporter, periplasmic sulfate- binding protein	4.16569e-08	unclonable	COG1613
Alicyclobacillus acidocaldarius subsp. acidocaldarius DSM 446	521098	NC_013205	Aaci_2845	ABC transporter related	3.05436e-08	unclonable	COG1116
Alicyclobacillus acidocaldarius subsp. acidocaldarius DSM 446	521098	NC_013205	Aaci_2910	biotin/lipoyl attachment domain-containing protein	2.63786e-06	decreased coverage	COG1566
Alicyclobacillus acidocaldarius subsp. acidocaldarius DSM 446	521098	NC_013205	Aaci_2911	heat shock protein DnaJ domain protein	2.93792e-06	decreased coverage	COG0484
Alicyclobacillus acidocaldarius subsp. acidocaldarius DSM 446	521098	NC_013206	Aaci_2952	hypothetical protein	6.89868e-12	unclonable	\N
Alicyclobacillus acidocaldarius subsp. acidocaldarius DSM 446	521098	NC_013206	Aaci_2953	hypothetical protein	8.32584e-11	unclonable	\N
Alicyclobacillus acidocaldarius subsp. acidocaldarius DSM 446	521098	NC_013206	Aaci_2954	transcriptional regulator, XRE family	4.01895e-12	unclonable	COG1974
Alicyclobacillus acidocaldarius subsp. acidocaldarius DSM 446	521098	NC_013206	Aaci_2987	phosphoribosylglycinamide synthetase	8.75543e-11	unclonable	COG0439
Alicyclobacillus acidocaldarius subsp. acidocaldarius DSM 446	521098	NC_013206	Aaci_2988	major facilitator superfamily MFS_1	3.35031e-11	unclonable	COG2814
Alicyclobacillus acidocaldarius subsp. acidocaldarius DSM 446	521098	NC_013206	Aaci_3000	hypothetical protein	1.81354e-07	decreased coverage	\N
Alicyclobacillus acidocaldarius subsp. acidocaldarius DSM 446	521098	NC_013205	Aaci_R0027	16S ribosomal RNA	2.50907e-07	unclonable	\N
Alicyclobacillus acidocaldarius subsp. acidocaldarius DSM 446	521098	NC_013205	Aaci_R0034	tRNA-Pro	2.21471e-09	unclonable	\N
Alicyclobacillus acidocaldarius subsp. acidocaldarius DSM 446	521098	NC_013205	Aaci_R0046	tRNA-Ser	0.00112591	decreased coverage	\N
Alicyclobacillus acidocaldarius subsp. acidocaldarius DSM 446	521098	NC_013205	Aaci_R0047	tRNA-Met	0.00104453	decreased coverage	\N
Alicyclobacillus acidocaldarius subsp. acidocaldarius DSM 446	521098	NC_013205	Aaci_R0048	tRNA-Thr	0.00108032	decreased coverage	\N
Alicyclobacillus acidocaldarius subsp. acidocaldarius DSM 446	521098	NC_013205	Aaci_R0049	16S ribosomal RNA	2.50907e-07	unclonable	\N
Alicyclobacillus acidocaldarius subsp. acidocaldarius DSM 446	521098	NC_013205	Aaci_R0061	tRNA-Arg	6.31723e-08	decreased coverage	\N
Alicyclobacillus acidocaldarius subsp. acidocaldarius DSM 446	521098	NC_013205	Aaci_R0062	tRNA-Gly	5.96481e-08	decreased coverage	\N
Alicyclobacillus acidocaldarius subsp. acidocaldarius DSM 446	521098	NC_013205	Aaci_R0071	tRNA-Gly	0.00174778	decreased coverage	\N
Alicyclobacillus acidocaldarius subsp. acidocaldarius DSM 446	521098	NC_013205	Aaci_R0072	tRNA-Phe	0.00159323	decreased coverage	\N
Alicyclobacillus acidocaldarius subsp. acidocaldarius DSM 446	521098	NC_013205	Aaci_R0073	tRNA-Ala	0.00171316	decreased coverage	\N
Acidovorax citrulli AAC00-1	397945	NC_008752	Aave_0338	50S ribosomal protein L3	2.74222e-06	decreased coverage	COG0087
Acidovorax citrulli AAC00-1	397945	NC_008752	Aave_0611	50S ribosomal protein L14	0.00801409	decreased coverage	COG0093
Acidovorax citrulli AAC00-1	397945	NC_008752	Aave_0613	50S ribosomal protein L5	0.00554021	decreased coverage	COG0094
Acidovorax citrulli AAC00-1	397945	NC_008752	Aave_0940	methyl-accepting chemotaxis sensory transducer	9.58657e-07	unclonable	COG0840
Acidovorax citrulli AAC00-1	397945	NC_008752	Aave_1347	hypothetical protein	0.000144292	decreased coverage	\N
Acidovorax citrulli AAC00-1	397945	NC_008752	Aave_1368	hypothetical protein	0.0029518	decreased coverage	\N
Acidovorax citrulli AAC00-1	397945	NC_008752	Aave_1369	hypothetical protein	0.00600356	decreased coverage	\N
Acidovorax citrulli AAC00-1	397945	NC_008752	Aave_1520	hypothetical protein	0.00374201	decreased coverage	\N
Acidovorax citrulli AAC00-1	397945	NC_008752	Aave_1539	adenosylcobinamide kinase	6.75661e-06	decreased coverage	COG2087
Acidovorax citrulli AAC00-1	397945	NC_008752	Aave_1717	Arc domain-containing protein	2.98141e-07	decreased coverage	\N
Acidovorax citrulli AAC00-1	397945	NC_008752	Aave_1814	hypothetical protein	0.0045868	decreased coverage	COG1284
Acidovorax citrulli AAC00-1	397945	NC_008752	Aave_1886	tRNA (guanine-N(1)-)-methyltransferase	0.000334711	decreased coverage	COG0336
Acidovorax citrulli AAC00-1	397945	NC_008752	Aave_1888	NUDIX hydrolase	0.00118194	decreased coverage	COG0494
Acidovorax citrulli AAC00-1	397945	NC_008752	Aave_1889	hypothetical protein	0.00289969	decreased coverage	COG1270
Acidovorax citrulli AAC00-1	397945	NC_008752	Aave_1910	hypothetical protein	8.86145e-08	unclonable	\N
Acidovorax citrulli AAC00-1	397945	NC_008752	Aave_1944	zinc/iron permease	0.000552942	decreased coverage	COG0428
Acidovorax citrulli AAC00-1	397945	NC_008752	Aave_1945	argininosuccinate lyase	7.41836e-05	decreased coverage	COG0165
Acidovorax citrulli AAC00-1	397945	NC_008752	Aave_2018	TRAP dicarboxylate transporter, DctM subunit	0.00336754	decreased coverage	COG4664
Acidovorax citrulli AAC00-1	397945	NC_008752	Aave_2039	acriflavin resistance protein	0.00865323	decreased coverage	COG0841
Acidovorax citrulli AAC00-1	397945	NC_008752	Aave_2085	major facilitator superfamily transporter	0.00714059	decreased coverage	COG2814
Acidovorax citrulli AAC00-1	397945	NC_008752	Aave_2171	2-nitropropane dioxygenase, NPD	0.00656202	decreased coverage	COG2070
Acidovorax citrulli AAC00-1	397945	NC_008752	Aave_2241	methyl-accepting chemotaxis sensory transducer	6.11014e-07	unclonable	COG0840
Acidovorax citrulli AAC00-1	397945	NC_008752	Aave_2263	thiamine pyrophosphate protein	1.36096e-06	unclonable	COG0028
Acidovorax citrulli AAC00-1	397945	NC_008752	Aave_2264	hypothetical protein	1.52095e-07	unclonable	COG4637
Acidovorax citrulli AAC00-1	397945	NC_008752	Aave_2265	hypothetical protein	1.16311e-08	unclonable	\N
Acidovorax citrulli AAC00-1	397945	NC_008752	Aave_2285	major facilitator superfamily transporter	0.00827549	decreased coverage	\N
Acidovorax citrulli AAC00-1	397945	NC_008752	Aave_2340	hypothetical protein	2.89954e-05	decreased coverage	\N
Acidovorax citrulli AAC00-1	397945	NC_008752	Aave_2377	chromosome partitioning ATPase	3.29135e-08	unclonable	COG1192
Acidovorax citrulli AAC00-1	397945	NC_008752	Aave_2470	cyclohexadienyl dehydratase	0.00435864	decreased coverage	COG0834
Acidovorax citrulli AAC00-1	397945	NC_008752	Aave_2496	methyl-accepting chemotaxis sensory transducer	8.62286e-06	decreased coverage	COG0840
Acidovorax citrulli AAC00-1	397945	NC_008752	Aave_2539	YaeC family lipoprotein	0.00124943	decreased coverage	COG1464
Acidovorax citrulli AAC00-1	397945	NC_008752	Aave_2582	hypothetical protein	0.00114965	decreased coverage	\N
Acidovorax citrulli AAC00-1	397945	NC_008752	Aave_2591	gluconolactonase	0.000189317	decreased coverage	COG3386
Acidovorax citrulli AAC00-1	397945	NC_008752	Aave_2601	hypothetical protein	0.00112526	decreased coverage	\N
Acidovorax citrulli AAC00-1	397945	NC_008752	Aave_2635	50S ribosomal protein L31P	0.00389942	decreased coverage	COG0254
Acidovorax citrulli AAC00-1	397945	NC_008752	Aave_2659	molybdenum cofactor biosynthesis protein A	0.00949388	decreased coverage	COG2896
Acidovorax citrulli AAC00-1	397945	NC_008752	Aave_2660	3-ketoacyl-(acyl-carrier-protein) reductase	0.00127593	decreased coverage	COG1028
Acidovorax citrulli AAC00-1	397945	NC_008752	Aave_2769	hypothetical protein	8.78874e-09	unclonable	\N
Acidovorax citrulli AAC00-1	397945	NC_008752	Aave_2770	hypothetical protein	4.36346e-09	unclonable	\N
Acidovorax citrulli AAC00-1	397945	NC_008752	Aave_2803	pyridoxamine 5'-phosphate oxidase	0.00595972	decreased coverage	COG0259
Acidovorax citrulli AAC00-1	397945	NC_008752	Aave_3072	hypothetical protein	0.00416255	decreased coverage	\N
Acidovorax citrulli AAC00-1	397945	NC_008752	Aave_3094	OmpW family protein	0.000267766	decreased coverage	COG3047
Acidovorax citrulli AAC00-1	397945	NC_008752	Aave_3114	putative transmembrane protein	0.00774236	decreased coverage	\N
Acidovorax citrulli AAC00-1	397945	NC_008752	Aave_3117	diacylglycerol kinase	0.00354589	decreased coverage	COG0818
Acidovorax citrulli AAC00-1	397945	NC_008752	Aave_3167	putative aminotransferase	0.0026749	decreased coverage	COG0436
Acidovorax citrulli AAC00-1	397945	NC_008752	Aave_3168	putative esterase	0.000470113	decreased coverage	COG0657
Acidovorax citrulli AAC00-1	397945	NC_008752	Aave_3285	30S ribosomal protein S1	0.00279338	decreased coverage	COG0539
Acidovorax citrulli AAC00-1	397945	NC_008752	Aave_3495	putative adenylate/guanylate cyclase	0.00124447	decreased coverage	COG2114
Acidovorax citrulli AAC00-1	397945	NC_008752	Aave_3588	hypothetical protein	6.58538e-08	decreased coverage	\N
Acidovorax citrulli AAC00-1	397945	NC_008752	Aave_3815	amidase	0.000420509	decreased coverage	COG0154
Acidovorax citrulli AAC00-1	397945	NC_008752	Aave_3816	branched chain amino acid ABC transporter periplasmic ligand-binding protein	0.00664463	decreased coverage	COG0683
Acidovorax citrulli AAC00-1	397945	NC_008752	Aave_3902	hypothetical protein	0.00331503	decreased coverage	COG3346
Acidovorax citrulli AAC00-1	397945	NC_008752	Aave_4106	ATPase domain-containing protein	1.14229e-06	decreased coverage	COG1192
Acidovorax citrulli AAC00-1	397945	NC_008752	Aave_4148	hypothetical protein	1.31336e-05	decreased coverage	\N
Acidovorax citrulli AAC00-1	397945	NC_008752	Aave_4471	primosomal protein N'	0.00895191	decreased coverage	COG1198
Acidovorax citrulli AAC00-1	397945	NC_008752	Aave_R0006	16S ribosomal RNA	4.63074e-05	decreased coverage	\N
Acidovorax citrulli AAC00-1	397945	NC_008752	Aave_R0058	tRNA-Thr	3.41468e-07	decreased coverage	\N
'Nostoc azollae' 0708	551115	NC_014248	Aazo_0001	\N	5.15989e-06	unclonable	\N
'Nostoc azollae' 0708	551115	NC_014248	Aazo_0002	hypothetical protein	5.14823e-07	unclonable	\N
'Nostoc azollae' 0708	551115	NC_014248	Aazo_0003	hypothetical protein	5.20094e-07	unclonable	\N
'Nostoc azollae' 0708	551115	NC_014248	Aazo_0004	hypothetical protein	2.24703e-06	unclonable	\N
'Nostoc azollae' 0708	551115	NC_014248	Aazo_0306	HtrA2 peptidase	0.00230132	decreased coverage	\N
'Nostoc azollae' 0708	551115	NC_014248	Aazo_0519	\N	6.00877e-05	decreased coverage	\N
'Nostoc azollae' 0708	551115	NC_014248	Aazo_0520	\N	0.000604478	decreased coverage	\N
'Nostoc azollae' 0708	551115	NC_014248	Aazo_0521	\N	5.73609e-05	decreased coverage	\N
'Nostoc azollae' 0708	551115	NC_014248	Aazo_0779	phosphoribosylamine/glycine ligase	0.00193673	decreased coverage	\N
'Nostoc azollae' 0708	551115	NC_014248	Aazo_0830	photosystem q(b) protein	0.00028698	decreased coverage	\N
'Nostoc azollae' 0708	551115	NC_014248	Aazo_0860	glutamate racemase	2.13664e-06	unclonable	\N
'Nostoc azollae' 0708	551115	NC_014248	Aazo_0861	N-acetylmuramoyl-L-alanine amidase	1.95536e-05	unclonable	\N
'Nostoc azollae' 0708	551115	NC_014248	Aazo_0868	rod shape-determining protein MreD	0.000649677	decreased coverage	\N
'Nostoc azollae' 0708	551115	NC_014248	Aazo_0889	nuclease	0.000805707	decreased coverage	\N
'Nostoc azollae' 0708	551115	NC_014248	Aazo_0890	(2Fe-2S) ferredoxin	0.00054006	decreased coverage	\N
'Nostoc azollae' 0708	551115	NC_014248	Aazo_0891	hypothetical protein	0.000394024	decreased coverage	\N
'Nostoc azollae' 0708	551115	NC_014248	Aazo_0892	hypothetical protein	0.00107222	decreased coverage	\N
'Nostoc azollae' 0708	551115	NC_014248	Aazo_0922	glycyl-tRNA synthetase subunit alpha	4.02813e-05	decreased coverage	\N
'Nostoc azollae' 0708	551115	NC_014248	Aazo_1044	hypothetical protein	2.74038e-07	unclonable	\N
'Nostoc azollae' 0708	551115	NC_014248	Aazo_1045	group 1 glycosyl transferase	1.51909e-06	unclonable	\N
'Nostoc azollae' 0708	551115	NC_014248	Aazo_1060	photosystem II 44 kDa subunit reaction center protein	3.66993e-05	decreased coverage	\N
'Nostoc azollae' 0708	551115	NC_014248	Aazo_1480	RpoD subfamily RNA polymerase sigma 70 subunit	4.52918e-06	unclonable	\N
'Nostoc azollae' 0708	551115	NC_014248	Aazo_1518	\N	2.82763e-05	decreased coverage	\N
'Nostoc azollae' 0708	551115	NC_014248	Aazo_1747	hypothetical protein	0.00929805	decreased coverage	\N
'Nostoc azollae' 0708	551115	NC_014248	Aazo_1748	\N	0.00813162	decreased coverage	\N
'Nostoc azollae' 0708	551115	NC_014248	Aazo_2050	\N	1.5841e-05	unclonable	\N
'Nostoc azollae' 0708	551115	NC_014248	Aazo_2051	\N	3.93528e-06	unclonable	\N
'Nostoc azollae' 0708	551115	NC_014248	Aazo_2085	hypothetical protein	0.00513635	decreased coverage	\N
'Nostoc azollae' 0708	551115	NC_014248	Aazo_2117	\N	0.00222872	decreased coverage	\N
'Nostoc azollae' 0708	551115	NC_014248	Aazo_2118	transposase	0.00219544	decreased coverage	\N
'Nostoc azollae' 0708	551115	NC_014248	Aazo_2119	\N	0.00250691	decreased coverage	\N
'Nostoc azollae' 0708	551115	NC_014248	Aazo_2120	hypothetical protein	0.00258166	decreased coverage	\N
'Nostoc azollae' 0708	551115	NC_014248	Aazo_2122	transposase IS4 family protein	0.00205429	decreased coverage	\N
'Nostoc azollae' 0708	551115	NC_014248	Aazo_2123	transposase	0.00183636	decreased coverage	\N
'Nostoc azollae' 0708	551115	NC_014248	Aazo_2125	hypothetical protein	0.00143591	decreased coverage	\N
'Nostoc azollae' 0708	551115	NC_014248	Aazo_2126	hypothetical protein	0.00135221	decreased coverage	\N
'Nostoc azollae' 0708	551115	NC_014248	Aazo_2133	hypothetical protein	0.0029443	decreased coverage	\N
'Nostoc azollae' 0708	551115	NC_014248	Aazo_2339	GCN5-like N-acetyltransferase	0.00797251	decreased coverage	\N
'Nostoc azollae' 0708	551115	NC_014248	Aazo_2450	\N	0.00689064	decreased coverage	\N
'Nostoc azollae' 0708	551115	NC_014248	Aazo_2473	8-amino-7-oxononanoate synthase	0.00670549	decreased coverage	\N
'Nostoc azollae' 0708	551115	NC_014248	Aazo_2474	Cobyrinic acid ac-diamide synthase	0.00522516	decreased coverage	\N
'Nostoc azollae' 0708	551115	NC_014248	Aazo_2475	\N	0.00175888	decreased coverage	\N
'Nostoc azollae' 0708	551115	NC_014248	Aazo_2737	carbohydrate-selective porin OprB	0.000147214	decreased coverage	\N
'Nostoc azollae' 0708	551115	NC_014248	Aazo_2738	\N	2.93524e-05	decreased coverage	\N
'Nostoc azollae' 0708	551115	NC_014248	Aazo_2817	RpoD subfamily RNA polymerase sigma 70 subunit	0.00156659	decreased coverage	\N
'Nostoc azollae' 0708	551115	NC_014248	Aazo_2897	50S ribosomal protein L9	0.000174347	decreased coverage	\N
'Nostoc azollae' 0708	551115	NC_014248	Aazo_2898	hydroxyacylglutathione hydrolase	0.00113363	decreased coverage	\N
'Nostoc azollae' 0708	551115	NC_014248	Aazo_2899	group 1 glycosyl transferase	0.00186189	decreased coverage	\N
'Nostoc azollae' 0708	551115	NC_014248	Aazo_3060	glutamyl-tRNA synthetase	4.48328e-06	unclonable	\N
'Nostoc azollae' 0708	551115	NC_014248	Aazo_3184	\N	0.00459993	decreased coverage	\N
'Nostoc azollae' 0708	551115	NC_014248	Aazo_3185	\N	0.00730837	decreased coverage	\N
'Nostoc azollae' 0708	551115	NC_014248	Aazo_3186	acetolactate synthase	0.00463399	decreased coverage	\N
'Nostoc azollae' 0708	551115	NC_014248	Aazo_3187	hypothetical protein	0.00459993	decreased coverage	\N
'Nostoc azollae' 0708	551115	NC_014248	Aazo_3188	translation initiation factor SUI1	0.00588203	decreased coverage	\N
'Nostoc azollae' 0708	551115	NC_014248	Aazo_3379	photosystem I reaction center subunit PsaK	1.07099e-05	decreased coverage	\N
'Nostoc azollae' 0708	551115	NC_014248	Aazo_3380	photosystem I reaction center subunit PsaK	1.08124e-05	decreased coverage	\N
'Nostoc azollae' 0708	551115	NC_014248	Aazo_3381	peptidase M50	3.9902e-05	decreased coverage	\N
'Nostoc azollae' 0708	551115	NC_014248	Aazo_3775	hypothetical protein	6.35481e-07	unclonable	\N
'Nostoc azollae' 0708	551115	NC_014248	Aazo_3776	ABC transporter-like protein protein	1.14768e-06	unclonable	\N
'Nostoc azollae' 0708	551115	NC_014248	Aazo_3777	hypothetical protein	6.16585e-07	unclonable	\N
'Nostoc azollae' 0708	551115	NC_014248	Aazo_3778	photosystem II D2 protein	1.6634e-06	unclonable	\N
'Nostoc azollae' 0708	551115	NC_014248	Aazo_3779	carbohydrate-selective porin OprB	7.85609e-06	unclonable	\N
'Nostoc azollae' 0708	551115	NC_014248	Aazo_3846	hypothetical protein	1.12454e-06	unclonable	\N
'Nostoc azollae' 0708	551115	NC_014248	Aazo_3847	\N	1.41613e-06	unclonable	\N
'Nostoc azollae' 0708	551115	NC_014248	Aazo_3848	diacylglycerol kinase catalytic region	4.1794e-06	unclonable	\N
'Nostoc azollae' 0708	551115	NC_014248	Aazo_3903	hypothetical protein	2.80049e-06	unclonable	\N
'Nostoc azollae' 0708	551115	NC_014248	Aazo_4164	\N	0.00670549	decreased coverage	\N
'Nostoc azollae' 0708	551115	NC_014248	Aazo_4165	\N	0.002818	decreased coverage	\N
'Nostoc azollae' 0708	551115	NC_014248	Aazo_4294	polynucleotide adenylyltransferase region	0.00498072	decreased coverage	\N
'Nostoc azollae' 0708	551115	NC_014248	Aazo_4295	photosystem II core protein PsbZ	0.0078659	decreased coverage	\N
'Nostoc azollae' 0708	551115	NC_014248	Aazo_4296	hypothetical protein	0.00870047	decreased coverage	\N
'Nostoc azollae' 0708	551115	NC_014248	Aazo_4421	pyrroline-5-carboxylate reductase	1.64624e-06	unclonable	\N
'Nostoc azollae' 0708	551115	NC_014248	Aazo_4422	hypothetical protein	1.12454e-06	unclonable	\N
'Nostoc azollae' 0708	551115	NC_014248	Aazo_4474	\N	6.41299e-05	decreased coverage	\N
'Nostoc azollae' 0708	551115	NC_014248	Aazo_4505	hypothetical protein	8.08004e-07	unclonable	\N
'Nostoc azollae' 0708	551115	NC_014248	Aazo_4506	\N	0.000131786	decreased coverage	\N
'Nostoc azollae' 0708	551115	NC_014248	Aazo_4610	peptidase M23	1.63265e-05	unclonable	\N
'Nostoc azollae' 0708	551115	NC_014248	Aazo_4692	\N	0.000922531	decreased coverage	\N
'Nostoc azollae' 0708	551115	NC_014248	Aazo_4838	S-adenosylmethionine synthetase	2.20213e-06	unclonable	\N
'Nostoc azollae' 0708	551115	NC_014248	Aazo_4839	Phosphoribulokinase	1.56566e-06	unclonable	\N
'Nostoc azollae' 0708	551115	NC_014248	Aazo_4962	short-chain dehydrogenase/reductase SDR	1.87582e-06	unclonable	\N
'Nostoc azollae' 0708	551115	NC_014248	Aazo_4978	photosystem I reaction center protein PsaF subunit III	1.64624e-06	unclonable	\N
'Nostoc azollae' 0708	551115	NC_014248	Aazo_5025	\N	0.00410262	decreased coverage	\N
'Nostoc azollae' 0708	551115	NC_014248	Aazo_5122	hypothetical protein	9.2192e-06	decreased coverage	\N
'Nostoc azollae' 0708	551115	NC_014248	Aazo_5123	\N	8.94724e-05	decreased coverage	\N
'Nostoc azollae' 0708	551115	NC_014248	Aazo_R0011	tRNA-Ser	0.000337805	decreased coverage	\N
'Nostoc azollae' 0708	551115	NC_014248	Aazo_R0012	tRNA-Ala	0.000301607	decreased coverage	\N
'Nostoc azollae' 0708	551115	NC_014248	Aazo_R0040	tRNA-Asp	3.89023e-07	unclonable	\N
'Nostoc azollae' 0708	551115	NC_014248	Aazo_R0045	tRNA-Asn	3.1214e-07	unclonable	\N
'Nostoc azollae' 0708	551115	NC_014248	Aazo_R0046	tRNA-Tyr	8.58289e-07	unclonable	\N
'Nostoc azollae' 0708	551115	NC_014248	Aazo_R0047	tRNA-Thr	8.41137e-07	unclonable	\N
Aciduliprofundum boonei T469	439481	NC_013926	Aboo_0072	translation elongation factor aEF-2	1.19399e-10	unclonable	\N
Aciduliprofundum boonei T469	439481	NC_013926	Aboo_0089	FAD-dependent pyridine nucleotide-disulfide oxidoreductase	0.000828017	decreased coverage	\N
Aciduliprofundum boonei T469	439481	NC_013926	Aboo_0132	hypothetical protein	0.00263601	decreased coverage	\N
Aciduliprofundum boonei T469	439481	NC_013926	Aboo_0173	ABC-2 type transporter	0.00869778	decreased coverage	\N
Aciduliprofundum boonei T469	439481	NC_013926	Aboo_0182	exosome complex exonuclease 1	2.82409e-05	decreased coverage	\N
Aciduliprofundum boonei T469	439481	NC_013926	Aboo_0183	K-like, type 1, subgroup	9.22938e-06	decreased coverage	\N
Aciduliprofundum boonei T469	439481	NC_013926	Aboo_0197	DEAD/H associated domain protein	0.000798352	unclonable	\N
Aciduliprofundum boonei T469	439481	NC_013926	Aboo_0232	hypothetical protein	1.12199e-14	unclonable	\N
Aciduliprofundum boonei T469	439481	NC_013926	Aboo_0233	type I phosphodiesterase/nucleotide pyrophosphatase	3.9384e-16	unclonable	\N
Aciduliprofundum boonei T469	439481	NC_013926	Aboo_0250	glycosyl transferase family 2	4.44925e-08	decreased coverage	\N
Aciduliprofundum boonei T469	439481	NC_013926	Aboo_0253	polysaccharide biosynthesis protein	1.23579e-06	decreased coverage	\N
Aciduliprofundum boonei T469	439481	NC_013926	Aboo_0340	protein of unknown function DUF35	2.62786e-05	decreased coverage	\N
Aciduliprofundum boonei T469	439481	NC_013926	Aboo_0379	NADH/Ubiquinone/plastoquinone (complex I)	6.19684e-12	unclonable	\N
Aciduliprofundum boonei T469	439481	NC_013926	Aboo_0407	extracellular solute-binding protein family 5	0.00229954	decreased coverage	\N
Aciduliprofundum boonei T469	439481	NC_013926	Aboo_0464	L-lysine 6-transaminase	0.00767316	decreased coverage	\N
Aciduliprofundum boonei T469	439481	NC_013926	Aboo_0536	3-dehydroquinate synthase	6.95262e-09	decreased coverage	\N
Aciduliprofundum boonei T469	439481	NC_013926	Aboo_0571	small GTP-binding protein	6.8839e-09	decreased coverage	\N
Aciduliprofundum boonei T469	439481	NC_013926	Aboo_0572	tRNA intron endonuclease	7.53451e-13	decreased coverage	\N
Aciduliprofundum boonei T469	439481	NC_013926	Aboo_0617	peptidase S15	1.6795e-05	decreased coverage	\N
Aciduliprofundum boonei T469	439481	NC_013926	Aboo_0618	hypothetical protein	1.13896e-06	decreased coverage	\N
Aciduliprofundum boonei T469	439481	NC_013926	Aboo_0711	Transketolase central region	2.02012e-06	decreased coverage	\N
Aciduliprofundum boonei T469	439481	NC_013926	Aboo_0731	Glycine C-acetyltransferase	0.000138233	decreased coverage	\N
Aciduliprofundum boonei T469	439481	NC_013926	Aboo_0749	ammonium transporter	2.61873e-05	decreased coverage	\N
Aciduliprofundum boonei T469	439481	NC_013926	Aboo_0773	NADH/Ubiquinone/plastoquinone (complex I)	0.00397311	decreased coverage	\N
Aciduliprofundum boonei T469	439481	NC_013926	Aboo_0843	binding-protein-dependent transport systems inner membrane component	3.35755e-10	unclonable	\N
Aciduliprofundum boonei T469	439481	NC_013926	Aboo_0876	flavodoxin/nitric oxide synthase	3.51493e-14	unclonable	\N
Aciduliprofundum boonei T469	439481	NC_013926	Aboo_0877	alkyl hydroperoxide reductase/ Thiol specific antioxidant/ Mal allergen	7.75979e-17	unclonable	\N
Aciduliprofundum boonei T469	439481	NC_013926	Aboo_0917	GTP-binding signal recognition particle SRP54 G- domain protein	1.45882e-13	unclonable	\N
Aciduliprofundum boonei T469	439481	NC_013926	Aboo_0977	FAD-dependent pyridine nucleotide-disulfide oxidoreductase	2.8046e-07	unclonable	\N
Aciduliprofundum boonei T469	439481	NC_013926	Aboo_0981	ferredoxin	2.4477e-15	unclonable	\N
Aciduliprofundum boonei T469	439481	NC_013926	Aboo_0982	L-aspartate oxidase	2.58616e-12	unclonable	\N
Aciduliprofundum boonei T469	439481	NC_013926	Aboo_0986	succinyl-CoA synthetase, beta subunit	9.27253e-15	unclonable	\N
Aciduliprofundum boonei T469	439481	NC_013926	Aboo_0987	succinyl-CoA synthetase, alpha subunit	1.73889e-15	unclonable	\N
Aciduliprofundum boonei T469	439481	NC_013926	Aboo_1004	hypothetical protein	1.87126e-15	decreased coverage	\N
Aciduliprofundum boonei T469	439481	NC_013926	Aboo_1005	hypothetical protein	1.13566e-15	decreased coverage	\N
Aciduliprofundum boonei T469	439481	NC_013926	Aboo_1006	hypothetical protein	1.28984e-15	decreased coverage	\N
Aciduliprofundum boonei T469	439481	NC_013926	Aboo_1007	hypothetical protein	1.30329e-15	decreased coverage	\N
Aciduliprofundum boonei T469	439481	NC_013926	Aboo_1008	K08849 mixed lineage kinase domain-like protein	1.09155e-15	decreased coverage	\N
Aciduliprofundum boonei T469	439481	NC_013926	Aboo_1009	hypothetical protein	3.66199e-12	decreased coverage	\N
Aciduliprofundum boonei T469	439481	NC_013926	Aboo_1013	hypothetical protein	8.58271e-11	decreased coverage	\N
Aciduliprofundum boonei T469	439481	NC_013926	Aboo_1024	CRISPR-associated RAMP protein, Csm5 family	3.4991e-07	decreased coverage	\N
Aciduliprofundum boonei T469	439481	NC_013926	Aboo_1032	plasmid stabilization system	2.45088e-17	unclonable	\N
Aciduliprofundum boonei T469	439481	NC_013926	Aboo_1033	hypothetical protein	1.62449e-17	unclonable	\N
Aciduliprofundum boonei T469	439481	NC_013926	Aboo_1054	hypothetical protein	2.40066e-14	unclonable	\N
Aciduliprofundum boonei T469	439481	NC_013926	Aboo_1060	hypothetical protein	3.0234e-14	unclonable	\N
Aciduliprofundum boonei T469	439481	NC_013926	Aboo_1061	hypothetical protein	3.33938e-15	unclonable	\N
Aciduliprofundum boonei T469	439481	NC_013926	Aboo_1090	DNA-directed RNA polymerase subunit A'	4.57669e-05	decreased coverage	\N
Aciduliprofundum boonei T469	439481	NC_013926	Aboo_1094	diacylglycerol kinase	0.000224255	decreased coverage	\N
Aciduliprofundum boonei T469	439481	NC_013926	Aboo_1103	DEAD/DEAH box helicase domain protein	1.46119e-10	unclonable	\N
Aciduliprofundum boonei T469	439481	NC_013926	Aboo_1104	major facilitator superfamily MFS_1	4.38266e-14	unclonable	\N
Aciduliprofundum boonei T469	439481	NC_013926	Aboo_1115	Aldehyde ferredoxin oxidoreductase	0.000328009	decreased coverage	\N
Aciduliprofundum boonei T469	439481	NC_013926	Aboo_1135	glutamate formiminotransferase	2.59237e-07	decreased coverage	\N
Aciduliprofundum boonei T469	439481	NC_013926	Aboo_1295	putative cytoplasmic protein	0.00243456	decreased coverage	\N
Aciduliprofundum boonei T469	439481	NC_013926	Aboo_1296	proteinase inhibitor I4 serpin	0.00386806	decreased coverage	\N
Aciduliprofundum boonei T469	439481	NC_013926	Aboo_1361	methylmalonyl-CoA epimerase	2.7651e-17	unclonable	\N
Aciduliprofundum boonei T469	439481	NC_013926	Aboo_1468	guanine deaminase	0.00567224	decreased coverage	\N
Aciduliprofundum boonei T469	439481	NC_013926	Aboo_1505	ribosomal protein L6P	2.66484e-16	unclonable	\N
Aciduliprofundum boonei T469	439481	NC_013926	Aboo_1506	ribosomal protein S8	1.05998e-16	unclonable	\N
Aciduliprofundum boonei T469	439481	NC_013926	Aboo_1507	ribosomal protein S14	1.59133e-17	unclonable	\N
Aciduliprofundum boonei T469	439481	NC_013926	Aboo_1508	ribosomal protein L5	2.2694e-16	unclonable	\N
Aciduliprofundum boonei T469	439481	NC_013926	Aboo_1509	Ribosomal protein S4E, central domain protein	7.86693e-16	unclonable	\N
Aciduliprofundum boonei T469	439481	NC_013926	Aboo_1510	ribosomal protein L24	1.23231e-16	unclonable	\N
Aciduliprofundum boonei T469	439481	NC_013926	Aboo_1511	50S ribosomal protein L14P	7.30331e-17	unclonable	\N
Aciduliprofundum boonei T469	439481	NC_013926	Aboo_1512	ribosomal protein S17P	2.87974e-17	unclonable	\N
Aciduliprofundum boonei T469	439481	NC_013926	Aboo_1513	Ribonuclease P, Rpp29	2.42497e-17	unclonable	\N
Aciduliprofundum boonei T469	439481	NC_013926	Aboo_1514	ribosomal protein L29	1.42468e-17	unclonable	\N
Aciduliprofundum boonei T469	439481	NC_013926	Aboo_1515	ribosomal protein S3	6.05815e-16	unclonable	\N
Aciduliprofundum boonei T469	439481	NC_013926	Aboo_1516	ribosomal protein L22	9.68145e-17	unclonable	\N
Aciduliprofundum boonei T469	439481	NC_013926	Aboo_1517	ribosomal protein S19	8.41136e-17	unclonable	\N
Aciduliprofundum boonei T469	439481	NC_013926	Aboo_1518	ribosomal protein L2	6.90355e-16	unclonable	\N
Aciduliprofundum boonei T469	439481	NC_013926	Aboo_R0035	tRNA-Cys	0.00020868	decreased coverage	\N
Acidothermus cellulolyticus 11B	351607	NC_008578	Acel_0154	formyltetrahydrofolate deformylase	0.00603763	decreased coverage	COG0788
Acidothermus cellulolyticus 11B	351607	NC_008578	Acel_0241	glutaredoxin 2	0.00557847	decreased coverage	\N
Acidothermus cellulolyticus 11B	351607	NC_008578	Acel_0243	hypothetical protein	0.00312792	decreased coverage	\N
Acidothermus cellulolyticus 11B	351607	NC_008578	Acel_0244	DNA binding domain-containing protein	0.00265398	decreased coverage	\N
Acidothermus cellulolyticus 11B	351607	NC_008578	Acel_0245	hypothetical protein	0.00516721	decreased coverage	\N
Acidothermus cellulolyticus 11B	351607	NC_008578	Acel_0635	glycosyl transferase family protein	0.00269925	decreased coverage	COG1215
Acidothermus cellulolyticus 11B	351607	NC_008578	Acel_0900	hypothetical protein	0.00277153	decreased coverage	COG0327
Acidothermus cellulolyticus 11B	351607	NC_008578	Acel_0976	AMP-dependent synthetase and ligase	0.00986526	decreased coverage	COG1022
Acidothermus cellulolyticus 11B	351607	NC_008578	Acel_1006	UDP-N-acetylmuramoyl-tripeptide--D-alanyl-D- alanine ligase	0.000549268	decreased coverage	COG0770
Acidothermus cellulolyticus 11B	351607	NC_008578	Acel_1075	tryptophan synthase subunit alpha	0.00681111	decreased coverage	COG0159
Acidothermus cellulolyticus 11B	351607	NC_008578	Acel_1163	cell wall surface anchor family protein	0.0024982	decreased coverage	\N
Acidothermus cellulolyticus 11B	351607	NC_008578	Acel_1280	FAD dependent oxidoreductase	0.00857441	decreased coverage	COG0665
Acidothermus cellulolyticus 11B	351607	NC_008578	Acel_1476	vitamin B12-dependent ribonucleotide reductase	0.00514202	decreased coverage	COG0209
Acidothermus cellulolyticus 11B	351607	NC_008578	Acel_1503	dihydrodipicolinate synthase	2.30491e-06	decreased coverage	COG0329
Acidothermus cellulolyticus 11B	351607	NC_008578	Acel_1654	ribonuclease BN	0.00658785	decreased coverage	COG1295
Acidothermus cellulolyticus 11B	351607	NC_008578	Acel_1686	glutamate racemase	0.000161224	decreased coverage	COG0796
Acidothermus cellulolyticus 11B	351607	NC_008578	Acel_R0009	tRNA-Arg	0.000808777	decreased coverage	\N
Candidatus Koribacter versatilis Ellin345	204669	NC_008009	Acid345_0001	chromosomal replication initiator protein DnaA	7.04659e-08	unclonable	COG0593
Candidatus Koribacter versatilis Ellin345	204669	NC_008009	Acid345_0147	protein translocase subunit secF	9.249e-06	decreased coverage	COG0341
Candidatus Koribacter versatilis Ellin345	204669	NC_008009	Acid345_0148	TonB-like protein	9.78892e-06	decreased coverage	COG0810
Candidatus Koribacter versatilis Ellin345	204669	NC_008009	Acid345_0178	hypothetical protein	0.000132954	decreased coverage	\N
Candidatus Koribacter versatilis Ellin345	204669	NC_008009	Acid345_0423	hypothetical protein	0.000804756	decreased coverage	\N
Candidatus Koribacter versatilis Ellin345	204669	NC_008009	Acid345_0512	potassium-transporting ATPase, C subunit	0.00499959	decreased coverage	COG2156
Candidatus Koribacter versatilis Ellin345	204669	NC_008009	Acid345_0560	TonB-like protein	3.37767e-07	decreased coverage	COG0810
Candidatus Koribacter versatilis Ellin345	204669	NC_008009	Acid345_0561	50S ribosomal protein L13	2.24516e-08	decreased coverage	COG0102
Candidatus Koribacter versatilis Ellin345	204669	NC_008009	Acid345_0562	SSU ribosomal protein S9P	1.34066e-08	decreased coverage	COG0103
Candidatus Koribacter versatilis Ellin345	204669	NC_008009	Acid345_0638	hypothetical protein	4.6909e-05	unclonable	\N
Candidatus Koribacter versatilis Ellin345	204669	NC_008009	Acid345_0662	parallel beta-helix repeat-containing protein	0.000522571	decreased coverage	\N
Candidatus Koribacter versatilis Ellin345	204669	NC_008009	Acid345_0895	NAD-dependent epimerase/dehydratase	8.13821e-05	decreased coverage	COG0451
Candidatus Koribacter versatilis Ellin345	204669	NC_008009	Acid345_0933	Cna B-type protein	0.000219871	unclonable	\N
Candidatus Koribacter versatilis Ellin345	204669	NC_008009	Acid345_0934	pyridoxal-dependent decarboxylase	2.18274e-07	unclonable	COG0076
Candidatus Koribacter versatilis Ellin345	204669	NC_008009	Acid345_0982	molecular chaperone DnaK	3.39197e-07	unclonable	COG0443
Candidatus Koribacter versatilis Ellin345	204669	NC_008009	Acid345_1078	PgPepO oligopeptidase	0.00182798	decreased coverage	COG3590
Candidatus Koribacter versatilis Ellin345	204669	NC_008009	Acid345_1079	oxidoreductase	0.00272705	decreased coverage	COG0673
Candidatus Koribacter versatilis Ellin345	204669	NC_008009	Acid345_1098	chaperonin Cpn10/GroES	3.47589e-10	unclonable	COG0234
Candidatus Koribacter versatilis Ellin345	204669	NC_008009	Acid345_1125	CopG family transcriptional regulator	1.21555e-06	decreased coverage	COG3905
Candidatus Koribacter versatilis Ellin345	204669	NC_008009	Acid345_1126	addiction module toxin, RelE/StbE	1.06734e-06	decreased coverage	COG3668
Candidatus Koribacter versatilis Ellin345	204669	NC_008009	Acid345_1134	putative transcriptional regulator	3.16036e-07	decreased coverage	COG3598
Candidatus Koribacter versatilis Ellin345	204669	NC_008009	Acid345_1221	30S ribosomal protein S12	7.86754e-06	decreased coverage	COG0048
Candidatus Koribacter versatilis Ellin345	204669	NC_008009	Acid345_1222	30S ribosomal protein S7	1.88964e-06	decreased coverage	COG0049
Candidatus Koribacter versatilis Ellin345	204669	NC_008009	Acid345_1248	methionine aminopeptidase, type I	4.62112e-06	decreased coverage	COG0024
Candidatus Koribacter versatilis Ellin345	204669	NC_008009	Acid345_1249	translation initiation factor IF-1	1.8307e-05	decreased coverage	COG0361
Candidatus Koribacter versatilis Ellin345	204669	NC_008009	Acid345_1302	hypothetical protein	0.00400766	decreased coverage	COG0596
Candidatus Koribacter versatilis Ellin345	204669	NC_008009	Acid345_1399	hypothetical protein	0.00112999	decreased coverage	\N
Candidatus Koribacter versatilis Ellin345	204669	NC_008009	Acid345_1538	TonB-dependent receptor	0.000318851	unclonable	\N
Candidatus Koribacter versatilis Ellin345	204669	NC_008009	Acid345_1633	hypothetical protein	0.00578112	decreased coverage	COG1232
Candidatus Koribacter versatilis Ellin345	204669	NC_008009	Acid345_1898	glycosyl hydrolase	4.19875e-05	unclonable	\N
Candidatus Koribacter versatilis Ellin345	204669	NC_008009	Acid345_2002	hypothetical protein	0.00963424	decreased coverage	COG4966
Candidatus Koribacter versatilis Ellin345	204669	NC_008009	Acid345_2072	putative outer membrane protein B, OmpB	1.03201e-08	unclonable	\N
Candidatus Koribacter versatilis Ellin345	204669	NC_008009	Acid345_2073	parallel beta-helix repeat-containing protein	6.71194e-09	unclonable	\N
Candidatus Koribacter versatilis Ellin345	204669	NC_008009	Acid345_2223	single-strand binding protein	3.51539e-07	decreased coverage	COG0629
Candidatus Koribacter versatilis Ellin345	204669	NC_008009	Acid345_2261	hypothetical protein	1.57771e-06	decreased coverage	\N
Candidatus Koribacter versatilis Ellin345	204669	NC_008009	Acid345_3217	hypothetical protein	0.00849386	decreased coverage	\N
Candidatus Koribacter versatilis Ellin345	204669	NC_008009	Acid345_3229	transcription termination factor Rho	5.48676e-08	unclonable	COG1158
Candidatus Koribacter versatilis Ellin345	204669	NC_008009	Acid345_3272	hypothetical protein	1.23414e-07	unclonable	\N
Candidatus Koribacter versatilis Ellin345	204669	NC_008009	Acid345_3463	ArsR family transcriptional regulator	1.13736e-05	decreased coverage	COG0640
Candidatus Koribacter versatilis Ellin345	204669	NC_008009	Acid345_3480	diguanylate cyclase with PAS/PAC sensor	0.00742863	decreased coverage	COG2199
Candidatus Koribacter versatilis Ellin345	204669	NC_008009	Acid345_3543	thiol oxidoreductase-like	0.00122263	decreased coverage	COG3488
Candidatus Koribacter versatilis Ellin345	204669	NC_008009	Acid345_3718	hypothetical protein	0.00204077	decreased coverage	COG3059
Candidatus Koribacter versatilis Ellin345	204669	NC_008009	Acid345_3901	hypothetical protein	1.12288e-07	decreased coverage	\N
Candidatus Koribacter versatilis Ellin345	204669	NC_008009	Acid345_3902	histone deacetylase superfamily protein	2.51706e-07	decreased coverage	COG0123
Candidatus Koribacter versatilis Ellin345	204669	NC_008009	Acid345_3909	TonB-dependent receptor	6.52763e-05	unclonable	\N
Candidatus Koribacter versatilis Ellin345	204669	NC_008009	Acid345_4161	N-acetyl-gamma-glutamyl-phosphate reductase	0.0034393	decreased coverage	COG0002
Candidatus Koribacter versatilis Ellin345	204669	NC_008009	Acid345_4162	ArgR family transcriptional regulator	0.00922797	decreased coverage	COG1438
Candidatus Koribacter versatilis Ellin345	204669	NC_008009	Acid345_4218	NusA antitermination factor	1.84689e-05	decreased coverage	COG0195
Candidatus Koribacter versatilis Ellin345	204669	NC_008009	Acid345_4250	hypothetical protein	0.00701403	decreased coverage	\N
Candidatus Koribacter versatilis Ellin345	204669	NC_008009	Acid345_4334	F0F1 ATP synthase subunit alpha	0.00117083	decreased coverage	COG0056
Candidatus Koribacter versatilis Ellin345	204669	NC_008009	Acid345_4349	hypothetical protein	0.00411477	decreased coverage	\N
Candidatus Koribacter versatilis Ellin345	204669	NC_008009	Acid345_4483	TonB-dependent receptor	2.31942e-06	unclonable	COG4206
Candidatus Koribacter versatilis Ellin345	204669	NC_008009	Acid345_4540	ribose-phosphate pyrophosphokinase	2.1567e-06	decreased coverage	COG0462
Candidatus Koribacter versatilis Ellin345	204669	NC_008009	Acid345_4588	hypothetical protein	0.000137158	decreased coverage	\N
Candidatus Koribacter versatilis Ellin345	204669	NC_008009	Acid345_4619	hypothetical protein	0.00487202	decreased coverage	\N
Candidatus Koribacter versatilis Ellin345	204669	NC_008009	Acid345_4681	transcription antitermination protein nusG	0.000131174	decreased coverage	COG0250
Candidatus Koribacter versatilis Ellin345	204669	NC_008009	Acid345_4683	50S ribosomal protein L33	2.76978e-05	decreased coverage	COG0267
Candidatus Koribacter versatilis Ellin345	204669	NC_008009	Acid345_4684	elongation factor Tu	1.25263e-05	decreased coverage	COG0050
Candidatus Koribacter versatilis Ellin345	204669	NC_008009	Acid345_4765	ATPase AAA-2	0.000533628	decreased coverage	COG0542
Candidatus Koribacter versatilis Ellin345	204669	NC_008009	Acid345_4766	heat shock protein Hsp20	4.08851e-05	decreased coverage	COG0071
Candidatus Koribacter versatilis Ellin345	204669	NC_008009	Acid345_R0007	tRNA-Lys	6.8563e-07	decreased coverage	\N
Candidatus Koribacter versatilis Ellin345	204669	NC_008009	Acid345_R0035	tRNA-His	2.46336e-09	decreased coverage	\N
Acidiphilium cryptum JF-5	349163	NC_009484	Acry_0262	glycine cleavage T-protein, C-terminal barrel	0.00715457	decreased coverage	COG0354
Acidiphilium cryptum JF-5	349163	NC_009484	Acry_0325	PhzF family phenazine biosynthesis protein	0.00679482	decreased coverage	COG0384
Acidiphilium cryptum JF-5	349163	NC_009484	Acry_0326	hydrogenase assembly chaperone hypC/hupF	0.00530973	decreased coverage	COG0298
Acidiphilium cryptum JF-5	349163	NC_009484	Acry_0336	Ni/Fe-hydrogenase, b-type cytochrome subunit	0.00129504	decreased coverage	COG1969
Acidiphilium cryptum JF-5	349163	NC_009484	Acry_0488	hypothetical protein	0.00232982	decreased coverage	\N
Acidiphilium cryptum JF-5	349163	NC_009484	Acry_0615	glycosyl transferase, group 1	0.00376413	unclonable	COG0438,COG0463,COG3754
Acidiphilium cryptum JF-5	349163	NC_009484	Acry_0641	hypothetical protein	0.00375147	decreased coverage	\N
Acidiphilium cryptum JF-5	349163	NC_009484	Acry_0735	hypothetical protein	0.00190192	decreased coverage	\N
Acidiphilium cryptum JF-5	349163	NC_009484	Acry_0862	RNA polymerase sigma factor RpoD	0.0093579	decreased coverage	COG0568
Acidiphilium cryptum JF-5	349163	NC_009484	Acry_0888	fimbrial assembly family protein	4.54237e-05	decreased coverage	\N
Acidiphilium cryptum JF-5	349163	NC_009484	Acry_0889	hypothetical protein	1.06051e-05	decreased coverage	COG2165
Acidiphilium cryptum JF-5	349163	NC_009484	Acry_1084	hypothetical protein	0.00362147	decreased coverage	\N
Acidiphilium cryptum JF-5	349163	NC_009484	Acry_1166	triple helix repeat-containing collagen	0.000520628	unclonable	\N
Acidiphilium cryptum JF-5	349163	NC_009484	Acry_1207	protein of unknown function DUF893, YccS/YhfK	0.00411304	decreased coverage	COG1289
Acidiphilium cryptum JF-5	349163	NC_009484	Acry_1215	glucose-1-phosphate thymidylyltransferase	0.00725031	decreased coverage	COG1209
Acidiphilium cryptum JF-5	349163	NC_009484	Acry_1249	hypothetical protein	1.10171e-06	unclonable	\N
Acidiphilium cryptum JF-5	349163	NC_009484	Acry_1250	hypothetical protein	1.21941e-07	unclonable	COG2353
Acidiphilium cryptum JF-5	349163	NC_009484	Acry_1328	tryptophan synthase subunit beta	0.000691779	decreased coverage	COG0133
Acidiphilium cryptum JF-5	349163	NC_009484	Acry_1584	respiratory nitrate reductase, gamma subunit	8.63008e-05	decreased coverage	COG2181
Acidiphilium cryptum JF-5	349163	NC_009484	Acry_1590	alcohol dehydrogenase	0.00466455	decreased coverage	COG1063
Acidiphilium cryptum JF-5	349163	NC_009484	Acry_1746	imidazolonepropionase	1.14698e-06	unclonable	COG1228
Acidiphilium cryptum JF-5	349163	NC_009484	Acry_1747	histidine ammonia-lyase	5.10266e-05	decreased coverage	COG2986
Acidiphilium cryptum JF-5	349163	NC_009484	Acry_1872	hypothetical protein	0.00204012	decreased coverage	COG1814
Acidiphilium cryptum JF-5	349163	NC_009484	Acry_1896	Sel1 domain-containing protein	7.46321e-05	decreased coverage	COG0790
Acidiphilium cryptum JF-5	349163	NC_009484	Acry_2181	carboxymethylenebutenolidase	0.00295739	decreased coverage	COG0412
Acidiphilium cryptum JF-5	349163	NC_009484	Acry_2216	periplasmic binding protein/LacI transcriptional regulator	4.5016e-05	decreased coverage	COG1879
Acidiphilium cryptum JF-5	349163	NC_009484	Acry_2453	hypothetical protein	0.00273719	decreased coverage	COG0716
Acidiphilium cryptum JF-5	349163	NC_009484	Acry_2467	short-chain dehydrogenase/reductase SDR	0.00674966	decreased coverage	COG1028
Acidiphilium cryptum JF-5	349163	NC_009484	Acry_2661	ApaG	0.00116294	decreased coverage	COG2967
Acidiphilium cryptum JF-5	349163	NC_009484	Acry_2688	peptidoglycan-binding LysM	0.00047104	decreased coverage	COG1652
Acidiphilium cryptum JF-5	349163	NC_009484	Acry_2733	hypothetical protein	0.00413498	decreased coverage	\N
Acidiphilium cryptum JF-5	349163	NC_009484	Acry_2799	sulfite reductase subunit beta	0.00507806	decreased coverage	COG0155
Acidiphilium cryptum JF-5	349163	NC_009484	Acry_2898	lytic transglycosylase, catalytic	8.7511e-07	unclonable	\N
Acidiphilium cryptum JF-5	349163	NC_009484	Acry_3080	hypothetical protein	9.2136e-08	unclonable	COG0586
Acidiphilium cryptum JF-5	349163	NC_009484	Acry_3081	phospholipid/glycerol acyltransferase	1.81964e-07	unclonable	COG0204
Acidiphilium cryptum JF-5	349163	NC_009468	Acry_3449	hypothetical protein	0.00537518	decreased coverage	\N
Ammonifex degensii KC4	429009	NC_013385	Adeg_0015	hypothetical protein	1.17096e-08	decreased coverage	\N
Ammonifex degensii KC4	429009	NC_013385	Adeg_0045	outer membrane efflux protein	0.00077566	decreased coverage	COG1538
Ammonifex degensii KC4	429009	NC_013385	Adeg_0046	protein of unknown function UPF0236	0.00191865	decreased coverage	\N
Ammonifex degensii KC4	429009	NC_013385	Adeg_0063	peptide chain release factor 1	3.18273e-09	unclonable	COG0216
Ammonifex degensii KC4	429009	NC_013385	Adeg_0112	sodium:dicarboxylate symporter	2.89227e-06	decreased coverage	COG1301
Ammonifex degensii KC4	429009	NC_013385	Adeg_0128	Integrase catalytic region	8.25928e-09	unclonable	\N
Ammonifex degensii KC4	429009	NC_013385	Adeg_0129	ribosomal protein S21	3.81308e-11	unclonable	\N
Ammonifex degensii KC4	429009	NC_013385	Adeg_0153	transposase IS4 family protein	1.96095e-07	unclonable	COG3666
Ammonifex degensii KC4	429009	NC_013385	Adeg_0178	methylated-DNA/protein-cysteine methyltransferase	1.05952e-05	decreased coverage	COG0350
Ammonifex degensii KC4	429009	NC_013385	Adeg_0190	nicotinate (nicotinamide) nucleotide adenylyltransferase	1.36715e-07	decreased coverage	COG1057
Ammonifex degensii KC4	429009	NC_013385	Adeg_0191	RNP-1 like RNA-binding protein	7.94742e-06	decreased coverage	COG0724
Ammonifex degensii KC4	429009	NC_013385	Adeg_0192	iojap-like protein	1.39024e-05	decreased coverage	COG0799
Ammonifex degensii KC4	429009	NC_013385	Adeg_0211	50S ribosomal protein L13	1.31451e-05	decreased coverage	COG0102
Ammonifex degensii KC4	429009	NC_013385	Adeg_0220	\N	1.83549e-06	decreased coverage	\N
Ammonifex degensii KC4	429009	NC_013385	Adeg_0235	\N	3.39849e-05	decreased coverage	\N
Ammonifex degensii KC4	429009	NC_013385	Adeg_0236	Resolvase domain protein	2.23632e-05	decreased coverage	COG2452
Ammonifex degensii KC4	429009	NC_013385	Adeg_0273	hypothetical protein	9.98469e-08	decreased coverage	\N
Ammonifex degensii KC4	429009	NC_013385	Adeg_0327	transposase, IS605 OrfB family	0.00373732	decreased coverage	\N
Ammonifex degensii KC4	429009	NC_013385	Adeg_0368	\N	9.14909e-05	decreased coverage	\N
Ammonifex degensii KC4	429009	NC_013385	Adeg_0392	protein of unknown function DUF81	2.6561e-05	decreased coverage	COG0730
Ammonifex degensii KC4	429009	NC_013385	Adeg_0400	PilT protein domain protein	2.34721e-06	decreased coverage	COG4956
Ammonifex degensii KC4	429009	NC_013385	Adeg_0408	thiamineS protein	1.85395e-09	decreased coverage	\N
Ammonifex degensii KC4	429009	NC_013385	Adeg_0417	hypothetical protein	3.2467e-10	unclonable	\N
Ammonifex degensii KC4	429009	NC_013385	Adeg_0428	hypothetical protein	6.8891e-08	decreased coverage	\N
Ammonifex degensii KC4	429009	NC_013385	Adeg_0429	hypothetical protein	8.32319e-05	decreased coverage	COG1543
Ammonifex degensii KC4	429009	NC_013385	Adeg_0435	transcription attenuation protein MtrB	0.000796315	decreased coverage	\N
Ammonifex degensii KC4	429009	NC_013385	Adeg_0519	\N	0.000855576	decreased coverage	\N
Ammonifex degensii KC4	429009	NC_013385	Adeg_0520	transposase, IS605 OrfB family	0.000180512	decreased coverage	\N
Ammonifex degensii KC4	429009	NC_013385	Adeg_0533	UspA domain protein	7.25599e-07	decreased coverage	\N
Ammonifex degensii KC4	429009	NC_013385	Adeg_0548	SufBD protein	3.12333e-07	decreased coverage	COG0719
Ammonifex degensii KC4	429009	NC_013385	Adeg_0574	integrase family protein	6.63621e-08	decreased coverage	COG4974
Ammonifex degensii KC4	429009	NC_013385	Adeg_0635	ferrous iron transport protein B	3.06814e-05	decreased coverage	COG0370
Ammonifex degensii KC4	429009	NC_013385	Adeg_0636	hypothetical protein	2.71066e-10	unclonable	COG4378
Ammonifex degensii KC4	429009	NC_013385	Adeg_0682	hypothetical protein	3.17571e-08	unclonable	\N
Ammonifex degensii KC4	429009	NC_013385	Adeg_0710	hypothetical protein	8.86213e-09	unclonable	\N
Ammonifex degensii KC4	429009	NC_013385	Adeg_0723	hypothetical protein	2.62267e-06	decreased coverage	\N
Ammonifex degensii KC4	429009	NC_013385	Adeg_0725	transposase, IS605 OrfB family	0.000155555	decreased coverage	\N
Ammonifex degensii KC4	429009	NC_013385	Adeg_0744	Resolvase domain protein	1.24642e-07	decreased coverage	COG2452
Ammonifex degensii KC4	429009	NC_013385	Adeg_0778	SAF domain protein	4.67873e-05	decreased coverage	COG3745
Ammonifex degensii KC4	429009	NC_013385	Adeg_0824	\N	0.000124895	decreased coverage	COG3505
Ammonifex degensii KC4	429009	NC_013385	Adeg_0870	hypothetical protein	1.35378e-08	decreased coverage	\N
Ammonifex degensii KC4	429009	NC_013385	Adeg_0884	aspartate kinase	3.37521e-06	decreased coverage	COG0527
Ammonifex degensii KC4	429009	NC_013385	Adeg_0885	hypothetical protein	3.8146e-07	decreased coverage	\N
Ammonifex degensii KC4	429009	NC_013385	Adeg_0887	GMP synthase, large subunit	1.75854e-05	decreased coverage	COG0519
Ammonifex degensii KC4	429009	NC_013385	Adeg_0918	hypothetical protein	0.00435551	decreased coverage	COG1503
Ammonifex degensii KC4	429009	NC_013385	Adeg_0919	molybdenum cofactor synthesis domain protein	0.00423779	decreased coverage	COG0303
Ammonifex degensii KC4	429009	NC_013385	Adeg_0950	Hsp33 protein	8.11074e-08	decreased coverage	COG1281
Ammonifex degensii KC4	429009	NC_013385	Adeg_0951	protein of unknown function DUF177	1.2525e-08	decreased coverage	COG1399
Ammonifex degensii KC4	429009	NC_013385	Adeg_1005	transposase IS4 family protein	3.70054e-07	unclonable	COG3666
Ammonifex degensii KC4	429009	NC_013385	Adeg_1069	transposase, IS605 OrfB family	2.26138e-06	decreased coverage	COG0675
Ammonifex degensii KC4	429009	NC_013385	Adeg_1070	RNA-directed DNA polymerase (Reverse transcriptase)	2.76308e-06	decreased coverage	COG3344
Ammonifex degensii KC4	429009	NC_013385	Adeg_1163	protein of unknown function UPF0236	0.00489953	decreased coverage	\N
Ammonifex degensii KC4	429009	NC_013385	Adeg_1175	hypothetical protein	0.00374008	decreased coverage	\N
Ammonifex degensii KC4	429009	NC_013385	Adeg_1207	sodium/hydrogen exchanger	1.56939e-07	decreased coverage	COG0475
Ammonifex degensii KC4	429009	NC_013385	Adeg_1237	adenylate kinase	9.20741e-06	decreased coverage	COG0563
Ammonifex degensii KC4	429009	NC_013385	Adeg_1282	protein of unknown function DUF322	6.7785e-09	decreased coverage	COG1302
Ammonifex degensii KC4	429009	NC_013385	Adeg_1283	acetyl-CoA carboxylase, biotin carboxylase	7.30053e-06	decreased coverage	COG4770
Ammonifex degensii KC4	429009	NC_013385	Adeg_1376	hypothetical protein	4.21618e-07	decreased coverage	\N
Ammonifex degensii KC4	429009	NC_013385	Adeg_1377	hypothetical protein	1.7541e-06	decreased coverage	\N
Ammonifex degensii KC4	429009	NC_013385	Adeg_1417	signal recognition particle protein	1.88375e-08	unclonable	COG0541
Ammonifex degensii KC4	429009	NC_013385	Adeg_1426	4Fe-4S ferredoxin iron-sulfur binding domain protein	1.92957e-09	unclonable	COG0348
Ammonifex degensii KC4	429009	NC_013385	Adeg_1440	alanyl-tRNA synthetase	0.000329754	decreased coverage	COG0013
Ammonifex degensii KC4	429009	NC_013385	Adeg_1447	Cl- channel voltage-gated family protein	5.4528e-06	decreased coverage	COG0038
Ammonifex degensii KC4	429009	NC_013385	Adeg_1458	sodium/hydrogen exchanger	2.46002e-07	decreased coverage	COG0475
Ammonifex degensii KC4	429009	NC_013385	Adeg_1530	hypothetical protein	1.00287e-09	decreased coverage	COG1358
Ammonifex degensii KC4	429009	NC_013385	Adeg_1531	DNA-directed RNA polymerase, beta' subunit	0.00270247	decreased coverage	COG0086
Ammonifex degensii KC4	429009	NC_013385	Adeg_1541	DNA repair protein RadC	8.97994e-06	decreased coverage	COG2003
Ammonifex degensii KC4	429009	NC_013385	Adeg_1555	cell division protein FtsZ	4.89929e-09	unclonable	COG0206
Ammonifex degensii KC4	429009	NC_013385	Adeg_1608	hypothetical protein	1.05791e-10	unclonable	\N
Ammonifex degensii KC4	429009	NC_013385	Adeg_1643	copper amine oxidase domain protein	0.00153148	decreased coverage	\N
Ammonifex degensii KC4	429009	NC_013385	Adeg_1667	thioredoxin	1.31883e-10	unclonable	COG3118
Ammonifex degensii KC4	429009	NC_013385	Adeg_1740	\N	1.15615e-06	decreased coverage	\N
Ammonifex degensii KC4	429009	NC_013385	Adeg_1793	beta-lactamase domain protein	0.000988324	decreased coverage	COG1237
Ammonifex degensii KC4	429009	NC_013385	Adeg_1824	excinuclease ABC, A subunit	0.00152877	decreased coverage	COG0178
Ammonifex degensii KC4	429009	NC_013385	Adeg_1869	transposase, IS605 OrfB family	4.05396e-05	decreased coverage	\N
Ammonifex degensii KC4	429009	NC_013385	Adeg_1870	\N	1.25106e-06	decreased coverage	COG2452
Ammonifex degensii KC4	429009	NC_013385	Adeg_1871	biotin/acetyl-CoA-carboxylase ligase	3.12804e-05	decreased coverage	COG0340
Ammonifex degensii KC4	429009	NC_013385	Adeg_1892	Nitrite reductase (cytochrome; ammonia-forming)	6.6915e-07	decreased coverage	COG3303
Ammonifex degensii KC4	429009	NC_013385	Adeg_1906	transcriptional regulator, BadM/Rrf2 family	4.82606e-05	decreased coverage	COG1959
Ammonifex degensii KC4	429009	NC_013385	Adeg_1913	hypothetical protein	9.15773e-07	decreased coverage	\N
Ammonifex degensii KC4	429009	NC_013385	Adeg_1937	arsenical-resistance protein	5.66056e-05	decreased coverage	COG0798
Ammonifex degensii KC4	429009	NC_013385	Adeg_1993	protein of unknown function UPF0236	7.79773e-07	decreased coverage	\N
Ammonifex degensii KC4	429009	NC_013385	Adeg_2138	ribosomal protein S6	4.3387e-08	decreased coverage	COG0360
Ammonifex degensii KC4	429009	NC_013386	Adeg_2164	hypothetical protein	3.54539e-08	decreased coverage	\N
Ammonifex degensii KC4	429009	NC_013386	Adeg_2177	Domain of unknown function DUF1814	2.11086e-07	decreased coverage	COG2253
Ammonifex degensii KC4	429009	NC_013385	Adeg_R0003	tRNA-Val	5.79556e-09	decreased coverage	\N
Ammonifex degensii KC4	429009	NC_013385	Adeg_R0010	tRNA-Met	5.63126e-10	decreased coverage	\N
Ammonifex degensii KC4	429009	NC_013385	Adeg_R0022	16S ribosomal RNA	0.000353945	decreased coverage	\N
Ammonifex degensii KC4	429009	NC_013385	Adeg_R0028	tRNA-Thr	1.54592e-08	decreased coverage	\N
Ammonifex degensii KC4	429009	NC_013385	Adeg_R0029	tRNA-Gln	3.92756e-09	decreased coverage	\N
Ammonifex degensii KC4	429009	NC_013385	Adeg_R0030	tRNA-Glu	3.92756e-09	decreased coverage	\N
Ammonifex degensii KC4	429009	NC_013385	Adeg_R0034	tRNA-Pro	5.37169e-07	decreased coverage	\N
Anaeromyxobacter dehalogenans 2CP-C	290397	NC_007760	Adeh_0130	hypothetical protein	0.00621734	decreased coverage	\N
Anaeromyxobacter dehalogenans 2CP-C	290397	NC_007760	Adeh_0217	serine/threonine protein kinase	0.00807707	decreased coverage	COG0515
Anaeromyxobacter dehalogenans 2CP-C	290397	NC_007760	Adeh_0296	tRNA-(MS(2)IO(6)A)-hydroxylase-like	0.00711968	decreased coverage	COG4445
Anaeromyxobacter dehalogenans 2CP-C	290397	NC_007760	Adeh_0614	response regulator receiver (CheY-like) modulated CheB methylesterase	0.00621124	decreased coverage	COG2201
Anaeromyxobacter dehalogenans 2CP-C	290397	NC_007760	Adeh_0708	hypothetical protein	0.00451486	decreased coverage	\N
Anaeromyxobacter dehalogenans 2CP-C	290397	NC_007760	Adeh_0737	hypothetical protein	0.000826338	decreased coverage	COG4775
Anaeromyxobacter dehalogenans 2CP-C	290397	NC_007760	Adeh_0779	hypothetical protein	0.00353423	decreased coverage	\N
Anaeromyxobacter dehalogenans 2CP-C	290397	NC_007760	Adeh_0780	methyltransferase	0.00897963	decreased coverage	COG2890
Anaeromyxobacter dehalogenans 2CP-C	290397	NC_007760	Adeh_1204	V-type ATPase, D subunit	0.00302283	decreased coverage	COG1394
Anaeromyxobacter dehalogenans 2CP-C	290397	NC_007760	Adeh_1216	putative ferredoxin	5.29372e-05	decreased coverage	COG3411
Anaeromyxobacter dehalogenans 2CP-C	290397	NC_007760	Adeh_1217	short-chain dehydrogenase/reductase SDR	3.50545e-05	decreased coverage	COG1028
Anaeromyxobacter dehalogenans 2CP-C	290397	NC_007760	Adeh_1290	hypothetical protein	0.00418675	decreased coverage	\N
Anaeromyxobacter dehalogenans 2CP-C	290397	NC_007760	Adeh_1336	hypothetical protein	0.00108006	decreased coverage	\N
Anaeromyxobacter dehalogenans 2CP-C	290397	NC_007760	Adeh_1337	glycosyl transferase family protein	0.00375711	decreased coverage	COG0463
Anaeromyxobacter dehalogenans 2CP-C	290397	NC_007760	Adeh_1338	flagellar protein FliS like protein	0.000272458	decreased coverage	COG1516
Anaeromyxobacter dehalogenans 2CP-C	290397	NC_007760	Adeh_1339	flagellin-like	0.000247158	decreased coverage	COG1344
Anaeromyxobacter dehalogenans 2CP-C	290397	NC_007760	Adeh_1349	flagellar L-ring protein	0.00261084	decreased coverage	COG2063
Anaeromyxobacter dehalogenans 2CP-C	290397	NC_007760	Adeh_1355	sigma 28 (flagella/sporulation)	0.000951359	decreased coverage	COG1191
Anaeromyxobacter dehalogenans 2CP-C	290397	NC_007760	Adeh_1362	flagellar biosynthesis protein FliP	2.57945e-05	decreased coverage	COG1338
Anaeromyxobacter dehalogenans 2CP-C	290397	NC_007760	Adeh_1390	hypothetical protein	0.000398418	decreased coverage	\N
Anaeromyxobacter dehalogenans 2CP-C	290397	NC_007760	Adeh_1391	ATPase FliI/YscN	0.00127996	decreased coverage	COG1157
Anaeromyxobacter dehalogenans 2CP-C	290397	NC_007760	Adeh_1395	flagellar hook-basal body complex protein (FliE)	0.00257587	decreased coverage	COG1677
Anaeromyxobacter dehalogenans 2CP-C	290397	NC_007760	Adeh_1396	flagellar basal-body rod protein FlgC	0.00396064	decreased coverage	COG1558
Anaeromyxobacter dehalogenans 2CP-C	290397	NC_007760	Adeh_1526	cupin domain-containing protein	0.00102244	decreased coverage	COG0662
Anaeromyxobacter dehalogenans 2CP-C	290397	NC_007760	Adeh_1605	hypothetical protein	0.00294222	decreased coverage	\N
Anaeromyxobacter dehalogenans 2CP-C	290397	NC_007760	Adeh_1608	thioredoxin	0.00442059	decreased coverage	COG3118
Anaeromyxobacter dehalogenans 2CP-C	290397	NC_007760	Adeh_1670	hypothetical protein	0.00884296	decreased coverage	\N
Anaeromyxobacter dehalogenans 2CP-C	290397	NC_007760	Adeh_1671	dual specificity protein phosphatase	0.00163756	decreased coverage	COG2453
Anaeromyxobacter dehalogenans 2CP-C	290397	NC_007760	Adeh_1682	ribosomal large subunit pseudouridine synthase B	0.00200841	decreased coverage	COG1187
Anaeromyxobacter dehalogenans 2CP-C	290397	NC_007760	Adeh_1707	ATP-dependent protease La	0.00968626	decreased coverage	COG0466
Anaeromyxobacter dehalogenans 2CP-C	290397	NC_007760	Adeh_1811	glycosyl transferase family protein	0.000206288	decreased coverage	COG1215
Anaeromyxobacter dehalogenans 2CP-C	290397	NC_007760	Adeh_1968	DNA-binding protein Fis	0.000705843	decreased coverage	COG2204
Anaeromyxobacter dehalogenans 2CP-C	290397	NC_007760	Adeh_1969	integration host factor subunit alpha	0.0019696	decreased coverage	COG0776
Anaeromyxobacter dehalogenans 2CP-C	290397	NC_007760	Adeh_2200	PAS/PAC sensor hybrid histidine kinase	0.00863508	decreased coverage	COG4191
Anaeromyxobacter dehalogenans 2CP-C	290397	NC_007760	Adeh_2210	periplasmic sensor hybrid histidine kinase	0.00664902	decreased coverage	COG0642,COG0745
Anaeromyxobacter dehalogenans 2CP-C	290397	NC_007760	Adeh_2213	major facilitator superfamily transporter	0.0023669	decreased coverage	COG2814
Anaeromyxobacter dehalogenans 2CP-C	290397	NC_007760	Adeh_2214	LysR family transcriptional regulator	0.000844726	decreased coverage	COG0583
Anaeromyxobacter dehalogenans 2CP-C	290397	NC_007760	Adeh_2260	4Fe-4S ferredoxin, iron-sulfur binding protein	0.00125851	decreased coverage	COG1148
Anaeromyxobacter dehalogenans 2CP-C	290397	NC_007760	Adeh_2261	molecular chaperone-like	0.00444779	decreased coverage	COG0443
Anaeromyxobacter dehalogenans 2CP-C	290397	NC_007760	Adeh_2285	cytochrome c, class I	0.00711214	decreased coverage	COG4654
Anaeromyxobacter dehalogenans 2CP-C	290397	NC_007760	Adeh_2402	nitrous-oxide reductase	0.00162507	decreased coverage	COG4263
Anaeromyxobacter dehalogenans 2CP-C	290397	NC_007760	Adeh_2418	phosphatidylinositol alpha-mannosyltransferase	0.00701147	decreased coverage	COG0438
Anaeromyxobacter dehalogenans 2CP-C	290397	NC_007760	Adeh_2617	ABC multidrug efflux pump, fused ATPase and inner membrane subunits	0.00654185	decreased coverage	COG1132
Anaeromyxobacter dehalogenans 2CP-C	290397	NC_007760	Adeh_2647	sugar transferase	0.00209327	decreased coverage	COG2148
Anaeromyxobacter dehalogenans 2CP-C	290397	NC_007760	Adeh_2766	undecaprenyl-phosphate galactosephosphotransferase	0.00178659	decreased coverage	COG2148
Anaeromyxobacter dehalogenans 2CP-C	290397	NC_007760	Adeh_2858	hypothetical protein	0.00197139	decreased coverage	COG1913
Anaeromyxobacter dehalogenans 2CP-C	290397	NC_007760	Adeh_2918	hypothetical protein	0.00819813	decreased coverage	\N
Anaeromyxobacter dehalogenans 2CP-C	290397	NC_007760	Adeh_2987	tRNA/rRNA methyltransferase, SpoU	0.000142491	decreased coverage	COG0565
Anaeromyxobacter dehalogenans 2CP-C	290397	NC_007760	Adeh_3085	argininosuccinate synthase	0.0020756	decreased coverage	COG0137
Anaeromyxobacter dehalogenans 2CP-C	290397	NC_007760	Adeh_3100	hypothetical protein	0.00381116	decreased coverage	COG2267
Anaeromyxobacter dehalogenans 2CP-C	290397	NC_007760	Adeh_3127	hypothetical protein	0.00492503	decreased coverage	\N
Anaeromyxobacter dehalogenans 2CP-C	290397	NC_007760	Adeh_3368	twitching motility protein	0.00118657	decreased coverage	COG2805
Anaeromyxobacter dehalogenans 2CP-C	290397	NC_007760	Adeh_3416	hypothetical protein	0.000969861	decreased coverage	\N
Anaeromyxobacter dehalogenans 2CP-C	290397	NC_007760	Adeh_3417	hypothetical protein	0.00291729	decreased coverage	\N
Anaeromyxobacter dehalogenans 2CP-C	290397	NC_007760	Adeh_3423	homogentisate 1,2-dioxygenase	0.00233011	decreased coverage	COG3508
Anaeromyxobacter dehalogenans 2CP-C	290397	NC_007760	Adeh_3621	hypothetical protein	9.26642e-05	decreased coverage	\N
Anaeromyxobacter dehalogenans 2CP-C	290397	NC_007760	Adeh_4009	two component transcriptional regulator	0.00751412	decreased coverage	COG0745
Anaeromyxobacter dehalogenans 2CP-C	290397	NC_007760	Adeh_4036	hypothetical protein	0.00975433	decreased coverage	\N
Anaeromyxobacter dehalogenans 2CP-C	290397	NC_007760	Adeh_4042	HNH endonuclease	0.00210589	decreased coverage	\N
Acidimicrobium ferrooxidans DSM 10331	525909	NC_013124	Afer_0020	Chitinase	0.00474187	decreased coverage	\N
Acidimicrobium ferrooxidans DSM 10331	525909	NC_013124	Afer_1280	\N	5.15274e-07	unclonable	\N
Acidimicrobium ferrooxidans DSM 10331	525909	NC_013124	Afer_1281	hypothetical protein	1.27211e-08	unclonable	\N
Acidimicrobium ferrooxidans DSM 10331	525909	NC_013124	Afer_1282	hypothetical protein	1.49355e-08	unclonable	\N
Acidimicrobium ferrooxidans DSM 10331	525909	NC_013124	Afer_1283	hypothetical protein	1.68478e-08	unclonable	\N
Acidimicrobium ferrooxidans DSM 10331	525909	NC_013124	Afer_1405	FAD-dependent pyridine nucleotide-disulphide oxidoreductase	0.00776945	decreased coverage	COG1252
Acidimicrobium ferrooxidans DSM 10331	525909	NC_013124	Afer_1483	hypothetical protein	4.03097e-06	decreased coverage	\N
Acidimicrobium ferrooxidans DSM 10331	525909	NC_013124	Afer_1505	RNA polymerase, sigma-24 subunit, ECF subfamily	0.00989017	decreased coverage	COG1595
Acidimicrobium ferrooxidans DSM 10331	525909	NC_013124	Afer_1789	transcriptional regulator, TetR family	0.00598195	decreased coverage	\N
Acidimicrobium ferrooxidans DSM 10331	525909	NC_013124	Afer_2004	regulatory protein GntR HTH	0.00794918	decreased coverage	COG2186
Acidimicrobium ferrooxidans DSM 10331	525909	NC_013124	Afer_R0010	tRNA-Tyr	0.00640732	decreased coverage	\N
Acidithiobacillus ferrooxidans ATCC 23270	243159	NC_011761	AFE_0136	hypothetical protein	0.000567334	decreased coverage	\N
Acidithiobacillus ferrooxidans ATCC 23270	243159	NC_011761	AFE_0229	polysaccharide deacetylase family protein	0.00859248	decreased coverage	COG0726
Acidithiobacillus ferrooxidans ATCC 23270	243159	NC_011761	AFE_0252	CDP-6-deoxy-L-threo-D-glycero-4-hexulose-3- dehydrase reductase, putative	0.00410911	unclonable	COG0543,COG0633
Acidithiobacillus ferrooxidans ATCC 23270	243159	NC_011761	AFE_0253	hypothetical protein	0.00023327	unclonable	\N
Acidithiobacillus ferrooxidans ATCC 23270	243159	NC_011761	AFE_0306	OmpA family protein	0.000558154	unclonable	COG2885
Acidithiobacillus ferrooxidans ATCC 23270	243159	NC_011761	AFE_0307	hypothetical protein	9.63451e-05	unclonable	\N
Acidithiobacillus ferrooxidans ATCC 23270	243159	NC_011761	AFE_0308	tRNA-Tyr	5.22223e-05	unclonable	\N
Acidithiobacillus ferrooxidans ATCC 23270	243159	NC_011761	AFE_0367	AhpC/TSA family/glutaredoxin domain protein	0.000740319	unclonable	COG0678,COG0695
Acidithiobacillus ferrooxidans ATCC 23270	243159	NC_011761	AFE_0368	phosphoserine phosphatase	0.00427946	unclonable	COG0560
Acidithiobacillus ferrooxidans ATCC 23270	243159	NC_011761	AFE_0382	ErfK/YbiS/YcfS/YnhG family protein	0.00597114	unclonable	COG1376
Acidithiobacillus ferrooxidans ATCC 23270	243159	NC_011761	AFE_0498	hypothetical protein	0.0035037	decreased coverage	COG5485
Acidithiobacillus ferrooxidans ATCC 23270	243159	NC_011761	AFE_0521	ATP-dependent Clp protease adaptor protein ClpS	0.00128815	decreased coverage	COG2127
Acidithiobacillus ferrooxidans ATCC 23270	243159	NC_011761	AFE_0522	peptidyl-prolyl cis-trans isomerase, PPIC-type	0.000852615	unclonable	COG0760
Acidithiobacillus ferrooxidans ATCC 23270	243159	NC_011761	AFE_0530	carbohydrate kinase, PfkB family	0.00148509	unclonable	COG0524
Acidithiobacillus ferrooxidans ATCC 23270	243159	NC_011761	AFE_0536	phosphoribulokinase	0.00207145	unclonable	COG3954
Acidithiobacillus ferrooxidans ATCC 23270	243159	NC_011761	AFE_0544	hypothetical protein	0.00193081	unclonable	COG2267
Acidithiobacillus ferrooxidans ATCC 23270	243159	NC_011761	AFE_0569	ErfK/YbiS/YcfS/YnhG family	0.00260954	unclonable	COG3034
Acidithiobacillus ferrooxidans ATCC 23270	243159	NC_011761	AFE_0984	ferredoxin	0.00858022	decreased coverage	COG1146
Acidithiobacillus ferrooxidans ATCC 23270	243159	NC_011761	AFE_0995	site-specific recombinase, phage integrase family	0.00503137	unclonable	COG4974
Acidithiobacillus ferrooxidans ATCC 23270	243159	NC_011761	AFE_0996	DNA binding protein, excisionase family	0.000176087	unclonable	\N
Acidithiobacillus ferrooxidans ATCC 23270	243159	NC_011761	AFE_0997	hypothetical protein	0.000287867	unclonable	\N
Acidithiobacillus ferrooxidans ATCC 23270	243159	NC_011761	AFE_0998	transcriptional regulator, putative	0.000689636	unclonable	COG2932
Acidithiobacillus ferrooxidans ATCC 23270	243159	NC_011761	AFE_1009	hypothetical protein	0.00736802	decreased coverage	\N
Acidithiobacillus ferrooxidans ATCC 23270	243159	NC_011761	AFE_1044	hypothetical protein	0.000183384	unclonable	\N
Acidithiobacillus ferrooxidans ATCC 23270	243159	NC_011761	AFE_1045	hypothetical protein	0.000366285	unclonable	\N
Acidithiobacillus ferrooxidans ATCC 23270	243159	NC_011761	AFE_1051	hypothetical protein	8.88837e-05	unclonable	\N
Acidithiobacillus ferrooxidans ATCC 23270	243159	NC_011761	AFE_1052	hypothetical protein	7.48972e-05	unclonable	\N
Acidithiobacillus ferrooxidans ATCC 23270	243159	NC_011761	AFE_1072	hypothetical protein	0.000933482	unclonable	\N
Acidithiobacillus ferrooxidans ATCC 23270	243159	NC_011761	AFE_1073	BRO family protein	0.00174599	unclonable	COG3617
Acidithiobacillus ferrooxidans ATCC 23270	243159	NC_011761	AFE_1074	hypothetical protein	8.28244e-05	unclonable	\N
Acidithiobacillus ferrooxidans ATCC 23270	243159	NC_011761	AFE_1075	hypothetical protein	0.00702033	unclonable	\N
Acidithiobacillus ferrooxidans ATCC 23270	243159	NC_011761	AFE_1085	thiol:disulfide interchange domain protein	0.00153173	unclonable	COG1651
Acidithiobacillus ferrooxidans ATCC 23270	243159	NC_011761	AFE_1145	tyrosine recombinase, phage integrase family	0.00135559	unclonable	COG4974
Acidithiobacillus ferrooxidans ATCC 23270	243159	NC_011761	AFE_1146	hypothetical protein	0.000174281	unclonable	\N
Acidithiobacillus ferrooxidans ATCC 23270	243159	NC_011761	AFE_1147	hypothetical protein	0.000115522	unclonable	\N
Acidithiobacillus ferrooxidans ATCC 23270	243159	NC_011761	AFE_1197	hypothetical protein	0.00120009	unclonable	\N
Acidithiobacillus ferrooxidans ATCC 23270	243159	NC_011761	AFE_1221	modification methylase, putative	0.000763333	unclonable	COG0863
Acidithiobacillus ferrooxidans ATCC 23270	243159	NC_011761	AFE_1222	hypothetical protein	0.00121289	unclonable	\N
Acidithiobacillus ferrooxidans ATCC 23270	243159	NC_011761	AFE_1223	hypothetical protein	0.000755507	unclonable	\N
Acidithiobacillus ferrooxidans ATCC 23270	243159	NC_011761	AFE_1224	hypothetical protein	8.11597e-05	unclonable	\N
Acidithiobacillus ferrooxidans ATCC 23270	243159	NC_011761	AFE_1225	hypothetical protein	5.49164e-05	unclonable	\N
Acidithiobacillus ferrooxidans ATCC 23270	243159	NC_011761	AFE_1244	hypothetical protein	0.000149959	unclonable	\N
Acidithiobacillus ferrooxidans ATCC 23270	243159	NC_011761	AFE_1245	hypothetical protein	0.000341314	unclonable	\N
Acidithiobacillus ferrooxidans ATCC 23270	243159	NC_011761	AFE_1259	hypothetical protein	0.00137396	decreased coverage	\N
Acidithiobacillus ferrooxidans ATCC 23270	243159	NC_011761	AFE_1362	plasmid stability protein, putative	0.00298137	decreased coverage	COG1487
Acidithiobacillus ferrooxidans ATCC 23270	243159	NC_011761	AFE_1363	nucleotidyltransferase, putative	0.00238094	decreased coverage	\N
Acidithiobacillus ferrooxidans ATCC 23270	243159	NC_011761	AFE_1364	hypothetical protein	0.00320209	decreased coverage	COG2250
Acidithiobacillus ferrooxidans ATCC 23270	243159	NC_011761	AFE_1498	ABC transporter, periplasmic substrate-binding protein, putative	0.00436727	unclonable	COG0725
Acidithiobacillus ferrooxidans ATCC 23270	243159	NC_011761	AFE_1509	iron-sulfur cluster assembly accessory protein	0.00886553	decreased coverage	COG0316
Acidithiobacillus ferrooxidans ATCC 23270	243159	NC_011761	AFE_1557	hypothetical protein	0.000105482	unclonable	\N
Acidithiobacillus ferrooxidans ATCC 23270	243159	NC_011761	AFE_1559	hypothetical protein	0.000127709	unclonable	\N
Acidithiobacillus ferrooxidans ATCC 23270	243159	NC_011761	AFE_1560	hypothetical protein	0.000179699	unclonable	\N
Acidithiobacillus ferrooxidans ATCC 23270	243159	NC_011761	AFE_1583	integration host factor, alpha subunit, putative	0.000127709	unclonable	COG0776
Acidithiobacillus ferrooxidans ATCC 23270	243159	NC_011761	AFE_1584	DNA-binding protein HU family protein	0.000100307	unclonable	COG0776
Acidithiobacillus ferrooxidans ATCC 23270	243159	NC_011761	AFE_1669	hypothetical protein	0.00850963	decreased coverage	\N
Acidithiobacillus ferrooxidans ATCC 23270	243159	NC_011761	AFE_1693	hypothetical protein	0.00150047	unclonable	\N
Acidithiobacillus ferrooxidans ATCC 23270	243159	NC_011761	AFE_1783	glutamate 5-kinase	0.00674296	unclonable	COG0263
Acidithiobacillus ferrooxidans ATCC 23270	243159	NC_011761	AFE_1881	hypothetical protein	0.00135559	unclonable	\N
Acidithiobacillus ferrooxidans ATCC 23270	243159	NC_011761	AFE_1922	ammonium transporter family protein	0.00667378	unclonable	COG0004
Acidithiobacillus ferrooxidans ATCC 23270	243159	NC_011761	AFE_1963	hypothetical protein	0.00127622	decreased coverage	\N
Acidithiobacillus ferrooxidans ATCC 23270	243159	NC_011761	AFE_2019	hypothetical protein	0.00266391	unclonable	\N
Acidithiobacillus ferrooxidans ATCC 23270	243159	NC_011761	AFE_2130	virulence-associated protein, putative	0.0065791	decreased coverage	COG4456
Acidithiobacillus ferrooxidans ATCC 23270	243159	NC_011761	AFE_2369	transcriptional regulator, ArsR family	0.000230878	unclonable	COG0640
Acidithiobacillus ferrooxidans ATCC 23270	243159	NC_011761	AFE_2557	hypothetical protein	0.00791893	decreased coverage	COG0425
Acidithiobacillus ferrooxidans ATCC 23270	243159	NC_011761	AFE_2732	iron oxidase	0.00132379	decreased coverage	\N
Acidithiobacillus ferrooxidans ATCC 23270	243159	NC_011761	AFE_2811	lipoprotein, putative	0.000106575	unclonable	\N
Acidithiobacillus ferrooxidans ATCC 23270	243159	NC_011761	AFE_2876	hypothetical protein	0.00403989	decreased coverage	COG2210
Acidithiobacillus ferrooxidans ATCC 23270	243159	NC_011761	AFE_2940	TonB-dependent receptor domain protein	0.00105315	unclonable	COG4771
Acidithiobacillus ferrooxidans ATCC 23270	243159	NC_011761	AFE_2941	hypothetical protein	8.98042e-05	unclonable	\N
Acidithiobacillus ferrooxidans ATCC 23270	243159	NC_011761	AFE_2942	hypothetical protein	0.000655601	unclonable	\N
Acidithiobacillus ferrooxidans ATCC 23270	243159	NC_011761	AFE_3145	hypothetical protein	8.45231e-05	unclonable	\N
Acidithiobacillus ferrooxidans ATCC 23270	243159	NC_011761	AFE_3146	rusticyanin	0.000525489	unclonable	\N
Acidithiobacillus ferrooxidans ATCC 23270	243159	NC_011761	AFE_3147	cytochrome c oxidase, aa3-type, subunit IV	0.000109854	unclonable	\N
Acidithiobacillus ferrooxidans ATCC 23270	243159	NC_011761	AFE_3148	cytochrome c oxidase, aa3-type, subunit III	0.000456698	unclonable	\N
Acidithiobacillus ferrooxidans ATCC 23270	243159	NC_011761	AFE_3240	Rrf2 family protein	0.000396914	unclonable	COG1959
Acidithiobacillus ferrooxidans ATCC 23270	243159	NC_011761	AFE_3272	hypothetical protein	0.00158874	decreased coverage	\N
Acidithiobacillus ferrooxidans ATCC 23270	243159	NC_011761	AFE_3273	hypothetical protein	0.00343994	decreased coverage	\N
Acidithiobacillus ferrooxidans ATCC 23270	243159	NC_011761	AFE_3295	glucose-1-phosphate thymidylyltransferase	0.00238421	unclonable	COG1209
Acidithiobacillus ferrooxidans ATCC 23270	243159	NC_011761	AFE_3306	hypothetical protein	0.00265046	decreased coverage	\N
Acidovorax sp. JS42	232721	NC_008782	Ajs_0276	elongation factor Tu	0.000219388	decreased coverage	COG0050
Acidovorax sp. JS42	232721	NC_008782	Ajs_0277	30S ribosomal protein S10	1.27009e-05	decreased coverage	COG0051
Acidovorax sp. JS42	232721	NC_008782	Ajs_0394	30S ribosomal protein S14	0.000622338	decreased coverage	COG0199
Acidovorax sp. JS42	232721	NC_008782	Ajs_0395	30S ribosomal protein S8	0.00245288	decreased coverage	COG0096
Acidovorax sp. JS42	232721	NC_008782	Ajs_0439	respiratory nitrate reductase gamma subunit	0.00872281	decreased coverage	COG2181
Acidovorax sp. JS42	232721	NC_008782	Ajs_0549	glycosyl transferase family protein	2.33931e-06	unclonable	COG0463
Acidovorax sp. JS42	232721	NC_008782	Ajs_0940	hypothetical protein	4.07685e-06	decreased coverage	\N
Acidovorax sp. JS42	232721	NC_008782	Ajs_0941	hypothetical protein	3.37828e-06	decreased coverage	\N
Acidovorax sp. JS42	232721	NC_008782	Ajs_0942	hypothetical protein	4.47883e-06	decreased coverage	\N
Acidovorax sp. JS42	232721	NC_008782	Ajs_1446	single-stranded DNA-binding protein	0.00973819	decreased coverage	COG0629
Acidovorax sp. JS42	232721	NC_008782	Ajs_1526	hypothetical protein	0.00702216	decreased coverage	\N
Acidovorax sp. JS42	232721	NC_008782	Ajs_1548	hypothetical protein	0.00328644	decreased coverage	\N
Acidovorax sp. JS42	232721	NC_008782	Ajs_1816	UspA domain-containing protein	0.00317647	decreased coverage	COG0589
Acidovorax sp. JS42	232721	NC_008782	Ajs_1895	nitric oxide dioxygenase	0.00231107	decreased coverage	COG1017,COG1018
Acidovorax sp. JS42	232721	NC_008782	Ajs_1994	hypothetical protein	0.00362251	decreased coverage	COG3181
Acidovorax sp. JS42	232721	NC_008782	Ajs_2033	TonB-dependent receptor	0.000947033	decreased coverage	COG1629
Acidovorax sp. JS42	232721	NC_008782	Ajs_2046	short-chain dehydrogenase/reductase SDR	0.00404736	decreased coverage	COG1028
Acidovorax sp. JS42	232721	NC_008782	Ajs_2082	patatin	0.00726346	decreased coverage	COG1752
Acidovorax sp. JS42	232721	NC_008782	Ajs_2099	putative signal peptide	0.00558021	decreased coverage	COG4313
Acidovorax sp. JS42	232721	NC_008782	Ajs_2202	DNA mismatch repair ATPase-like protein	0.000849326	decreased coverage	COG0323
Acidovorax sp. JS42	232721	NC_008782	Ajs_2217	hypothetical protein	0.00749141	decreased coverage	COG5293
Acidovorax sp. JS42	232721	NC_008782	Ajs_2218	TPR repeat-containing protein	0.000600865	unclonable	\N
Acidovorax sp. JS42	232721	NC_008782	Ajs_2253	HipA domain-containing protein	0.00653025	decreased coverage	COG3550
Acidovorax sp. JS42	232721	NC_008782	Ajs_2308	adenylate kinase	0.00367216	decreased coverage	COG0563
Acidovorax sp. JS42	232721	NC_008782	Ajs_2309	asparaginase	0.00324768	decreased coverage	COG0252
Acidovorax sp. JS42	232721	NC_008782	Ajs_2423	polysulphide reductase, NrfD	0.00497953	decreased coverage	COG3301
Acidovorax sp. JS42	232721	NC_008782	Ajs_2426	DEAD/DEAH box helicase domain-containing protein	0.00467654	decreased coverage	COG1204
Acidovorax sp. JS42	232721	NC_008782	Ajs_2494	phasin family protein	3.8642e-07	unclonable	\N
Acidovorax sp. JS42	232721	NC_008782	Ajs_2540	putative OriT-binding protein, TraK	0.00967752	decreased coverage	\N
Acidovorax sp. JS42	232721	NC_008782	Ajs_2717	hypothetical protein	1.53208e-06	decreased coverage	\N
Acidovorax sp. JS42	232721	NC_008782	Ajs_2882	alkyl hydroperoxide reductase subunit C	0.000958869	decreased coverage	COG0450
Acidovorax sp. JS42	232721	NC_008782	Ajs_2947	chromosome partitioning ATPase	1.47107e-05	decreased coverage	COG1192
Acidovorax sp. JS42	232721	NC_008782	Ajs_3036	VanZ family protein	0.000617485	decreased coverage	\N
Acidovorax sp. JS42	232721	NC_008782	Ajs_3416	TatD-related deoxyribonuclease	0.00399053	decreased coverage	COG0084
Acidovorax sp. JS42	232721	NC_008782	Ajs_3417	hypothetical protein	0.0064901	decreased coverage	\N
Acidovorax sp. JS42	232721	NC_008782	Ajs_3418	ArsR family transcriptional regulator	0.00835555	decreased coverage	COG0640
Acidovorax sp. JS42	232721	NC_008782	Ajs_3666	cell division protein FtsA	0.00516103	decreased coverage	COG0849
Acidovorax sp. JS42	232721	NC_008782	Ajs_3803	flagellar export protein FliJ	0.00367216	decreased coverage	COG2882
Acidovorax sp. JS42	232721	NC_008782	Ajs_3884	FAD dependent oxidoreductase	0.00847826	decreased coverage	COG2072
Acidovorax sp. JS42	232721	NC_008782	Ajs_3908	benzoate transporter	0.00157906	decreased coverage	COG3135
Acidovorax sp. JS42	232721	NC_008782	Ajs_3909	K+ potassium transporter	0.000284388	decreased coverage	COG3158
Acidovorax sp. JS42	232721	NC_008782	Ajs_3985	hypothetical protein	3.60213e-07	unclonable	COG1432
Acidovorax sp. JS42	232721	NC_008765	Ajs_4182	hypothetical protein	2.30688e-05	decreased coverage	\N
Acidovorax sp. JS42	232721	NC_008765	Ajs_4183	hypothetical protein	1.32578e-05	decreased coverage	\N
Acidovorax sp. JS42	232721	NC_008765	Ajs_4226	\N	0.00338168	decreased coverage	COG0358
Acidovorax sp. JS42	232721	NC_008766	Ajs_4248	hypothetical protein	0.00909879	decreased coverage	COG4227
Acidovorax sp. JS42	232721	NC_008766	Ajs_4275	conjugal transfer protein TrbA	6.75879e-22	decreased coverage	\N
Acidovorax sp. JS42	232721	NC_008766	Ajs_4296	addiction module antitoxin	2.63758e-08	decreased coverage	COG3041
Acidovorax sp. JS42	232721	NC_008766	Ajs_4297	addiction module antitoxin	8.2937e-08	decreased coverage	COG3077
Actinosynnema mirum DSM 43827	446462	NC_013093	Amir_0320	NADH dehydrogenase (quinone)	0.00131388	decreased coverage	COG0649
Actinosynnema mirum DSM 43827	446462	NC_013093	Amir_0335	ATPase AAA-2 domain protein	0.00535143	decreased coverage	COG0542
Actinosynnema mirum DSM 43827	446462	NC_013093	Amir_0415	hypothetical protein	0.00689765	decreased coverage	\N
Actinosynnema mirum DSM 43827	446462	NC_013093	Amir_0416	hypothetical protein	0.00717555	decreased coverage	\N
Actinosynnema mirum DSM 43827	446462	NC_013093	Amir_0417	hypothetical protein	0.0094002	decreased coverage	\N
Actinosynnema mirum DSM 43827	446462	NC_013093	Amir_0418	short-chain dehydrogenase/reductase SDR	0.00843006	decreased coverage	COG1028
Actinosynnema mirum DSM 43827	446462	NC_013093	Amir_0419	transcriptional regulator, TetR family	0.00785696	decreased coverage	COG1309
Actinosynnema mirum DSM 43827	446462	NC_013093	Amir_0420	putative hydrolase protein	0.00809324	decreased coverage	COG0596
Actinosynnema mirum DSM 43827	446462	NC_013093	Amir_0517	hypothetical protein	3.35621e-06	decreased coverage	\N
Actinosynnema mirum DSM 43827	446462	NC_013093	Amir_0537	hypothetical protein	1.79948e-05	decreased coverage	\N
Actinosynnema mirum DSM 43827	446462	NC_013093	Amir_0538	N-isopropylammelide isopropylaminohydrolase	2.64228e-06	decreased coverage	COG0402
Actinosynnema mirum DSM 43827	446462	NC_013093	Amir_0759	GTP-binding protein TypA	0.00250463	decreased coverage	COG1217
Actinosynnema mirum DSM 43827	446462	NC_013093	Amir_0820	PHP domain protein	4.00643e-05	decreased coverage	COG0613
Actinosynnema mirum DSM 43827	446462	NC_013093	Amir_0821	hypothetical protein	6.66708e-06	decreased coverage	COG2887
Actinosynnema mirum DSM 43827	446462	NC_013093	Amir_0839	nitrite reductase (NAD(P)H), small subunit	1.21321e-09	unclonable	COG2146
Actinosynnema mirum DSM 43827	446462	NC_013093	Amir_0840	Uroporphyrinogen III synthase HEM4	1.57223e-08	unclonable	COG1587
Actinosynnema mirum DSM 43827	446462	NC_013093	Amir_0841	cobalamin (vitamin B12) biosynthesis CbiX protein	6.19723e-09	unclonable	COG2138
Actinosynnema mirum DSM 43827	446462	NC_013093	Amir_0842	hypothetical protein	1.57366e-09	unclonable	\N
Actinosynnema mirum DSM 43827	446462	NC_013093	Amir_0859	hypothetical protein	0.00278552	decreased coverage	\N
Actinosynnema mirum DSM 43827	446462	NC_013093	Amir_1047	Non-specific serine/threonine protein kinase	0.00746664	decreased coverage	COG0553
Actinosynnema mirum DSM 43827	446462	NC_013093	Amir_1070	hypothetical protein	0.000415583	decreased coverage	\N
Actinosynnema mirum DSM 43827	446462	NC_013093	Amir_1178	transcriptional regulator, LuxR family	0.00127631	decreased coverage	COG3899
Actinosynnema mirum DSM 43827	446462	NC_013093	Amir_1179	\N	6.35075e-06	decreased coverage	\N
Actinosynnema mirum DSM 43827	446462	NC_013093	Amir_1306	diguanylate cyclase/phosphodiesterase with PAS/PAC sensor(s)	0.00348549	decreased coverage	COG5001
Actinosynnema mirum DSM 43827	446462	NC_013093	Amir_1330	nicotinamide mononucleotide transporter PnuC	3.81613e-05	decreased coverage	COG3201
Actinosynnema mirum DSM 43827	446462	NC_013093	Amir_1433	Peptidoglycan-binding LysM	0.00640605	decreased coverage	\N
Actinosynnema mirum DSM 43827	446462	NC_013093	Amir_1606	MaoC domain protein dehydratase	0.00168031	decreased coverage	COG2030
Actinosynnema mirum DSM 43827	446462	NC_013093	Amir_1750	40-residue YVTN family beta-propeller repeat protein	0.000566962	decreased coverage	COG3391
Actinosynnema mirum DSM 43827	446462	NC_013093	Amir_1751	major facilitator superfamily MFS_1	0.00152949	decreased coverage	\N
Actinosynnema mirum DSM 43827	446462	NC_013093	Amir_1795	xylose isomerase	0.000406384	decreased coverage	COG2115
Actinosynnema mirum DSM 43827	446462	NC_013093	Amir_1889	WGR domain-containing protein	0.00599399	decreased coverage	\N
Actinosynnema mirum DSM 43827	446462	NC_013093	Amir_1930	Alpha-N-arabinofuranosidase	0.00284341	decreased coverage	COG3534
Actinosynnema mirum DSM 43827	446462	NC_013093	Amir_1969	Triacylglycerol lipase	1.0339e-07	decreased coverage	COG1506
Actinosynnema mirum DSM 43827	446462	NC_013093	Amir_1970	transcriptional regulator, LuxR family	1.57383e-05	decreased coverage	COG2197
Actinosynnema mirum DSM 43827	446462	NC_013093	Amir_1998	dTDP-4-dehydrorhamnose reductase	8.98814e-06	decreased coverage	COG1091
Actinosynnema mirum DSM 43827	446462	NC_013093	Amir_1999	major facilitator superfamily MFS_1	1.99597e-05	decreased coverage	\N
Actinosynnema mirum DSM 43827	446462	NC_013093	Amir_2096	protein of unknown function DUF1696	0.00367109	decreased coverage	\N
Actinosynnema mirum DSM 43827	446462	NC_013093	Amir_2097	hypothetical protein	0.00590505	decreased coverage	\N
Actinosynnema mirum DSM 43827	446462	NC_013093	Amir_2107	elongation factor G	0.000230841	decreased coverage	COG0480
Actinosynnema mirum DSM 43827	446462	NC_013093	Amir_2141	RNA polymerase, sigma-24 subunit, ECF subfamily	5.50599e-07	decreased coverage	COG1595
Actinosynnema mirum DSM 43827	446462	NC_013093	Amir_2142	putative transmembrane transport protein	2.76265e-07	decreased coverage	\N
Actinosynnema mirum DSM 43827	446462	NC_013093	Amir_2152	ANTAR domain protein with unknown sensor	5.02711e-07	decreased coverage	COG3707
Actinosynnema mirum DSM 43827	446462	NC_013093	Amir_2245	transcriptional regulator, LuxR family	4.25814e-06	unclonable	COG3899
Actinosynnema mirum DSM 43827	446462	NC_013093	Amir_2257	5'-3' exonuclease	9.70599e-06	decreased coverage	COG0258
Actinosynnema mirum DSM 43827	446462	NC_013093	Amir_2298	ROK family protein	1.66992e-08	unclonable	COG1940
Actinosynnema mirum DSM 43827	446462	NC_013093	Amir_2363	response regulator receiver protein	3.90057e-07	decreased coverage	COG0745
Actinosynnema mirum DSM 43827	446462	NC_013093	Amir_2375	hypothetical protein	5.5116e-08	decreased coverage	\N
Actinosynnema mirum DSM 43827	446462	NC_013093	Amir_2376	transcriptional regulator, MarR family	6.79791e-08	decreased coverage	COG1846
Actinosynnema mirum DSM 43827	446462	NC_013093	Amir_2377	transcriptional regulator, XRE family	2.01287e-07	decreased coverage	\N
Actinosynnema mirum DSM 43827	446462	NC_013093	Amir_2378	short-chain dehydrogenase/reductase SDR	2.41123e-07	decreased coverage	COG1028
Actinosynnema mirum DSM 43827	446462	NC_013093	Amir_2379	hypothetical protein	3.48743e-08	decreased coverage	\N
Actinosynnema mirum DSM 43827	446462	NC_013093	Amir_2380	PAS/PAC sensor signal transduction histidine kinase	1.86709e-07	unclonable	COG5002
Actinosynnema mirum DSM 43827	446462	NC_013093	Amir_2413	hypothetical protein	2.08245e-09	unclonable	\N
Actinosynnema mirum DSM 43827	446462	NC_013093	Amir_2434	TM1410 hypothetical-related protein	0.00342831	decreased coverage	COG3868
Actinosynnema mirum DSM 43827	446462	NC_013093	Amir_2435	transcriptional regulator, DeoR family	0.0079946	decreased coverage	COG1349
Actinosynnema mirum DSM 43827	446462	NC_013093	Amir_2444	Alcohol dehydrogenase GroES domain protein	0.00100917	decreased coverage	COG0604
Actinosynnema mirum DSM 43827	446462	NC_013093	Amir_2479	hypothetical protein	3.19988e-08	decreased coverage	\N
Actinosynnema mirum DSM 43827	446462	NC_013093	Amir_2480	putative integral membrane protein	1.14797e-07	decreased coverage	COG5660
Actinosynnema mirum DSM 43827	446462	NC_013093	Amir_2483	hypothetical protein	8.55708e-06	decreased coverage	COG3889
Actinosynnema mirum DSM 43827	446462	NC_013093	Amir_2487	serine/threonine protein kinase	3.5224e-06	decreased coverage	COG0515
Actinosynnema mirum DSM 43827	446462	NC_013093	Amir_2510	hypothetical protein	0.00514736	unclonable	\N
Actinosynnema mirum DSM 43827	446462	NC_013093	Amir_2561	hypothetical protein	0.00089878	decreased coverage	\N
Actinosynnema mirum DSM 43827	446462	NC_013093	Amir_2562	hypothetical protein	0.00055451	decreased coverage	\N
Actinosynnema mirum DSM 43827	446462	NC_013093	Amir_2674	hypothetical protein	4.23316e-06	decreased coverage	COG1233
Actinosynnema mirum DSM 43827	446462	NC_013093	Amir_2700	histidine kinase	3.94923e-07	decreased coverage	COG4585
Actinosynnema mirum DSM 43827	446462	NC_013093	Amir_2715	Luciferase-like monooxygenase	1.36256e-07	decreased coverage	COG2141
Actinosynnema mirum DSM 43827	446462	NC_013093	Amir_2716	transcriptional regulator, LuxR family	4.19619e-05	decreased coverage	COG3899
Actinosynnema mirum DSM 43827	446462	NC_013093	Amir_2760	protein of unknown function DUF214	0.000148915	decreased coverage	COG4591
Actinosynnema mirum DSM 43827	446462	NC_013093	Amir_2790	hypothetical protein	0.00546434	decreased coverage	COG2409
Actinosynnema mirum DSM 43827	446462	NC_013093	Amir_2954	transcriptional regulator, putative ATPase, winged helix family	0.00262132	decreased coverage	COG3899
Actinosynnema mirum DSM 43827	446462	NC_013093	Amir_2967	aminotransferase class I and II	0.0077692	decreased coverage	COG1168
Actinosynnema mirum DSM 43827	446462	NC_013093	Amir_3044	rhamnose ABC transporter, periplasmic rhamnose- binding protein	0.00338498	decreased coverage	COG1879
Actinosynnema mirum DSM 43827	446462	NC_013093	Amir_3178	transcriptional regulator, LuxR family	0.00421599	decreased coverage	COG2197
Actinosynnema mirum DSM 43827	446462	NC_013093	Amir_3244	glycoside hydrolase family 25	0.0027526	decreased coverage	COG3757
Actinosynnema mirum DSM 43827	446462	NC_013093	Amir_3307	isochorismatase hydrolase	3.23098e-08	decreased coverage	COG1335
Actinosynnema mirum DSM 43827	446462	NC_013093	Amir_3308	transcriptional regulator, winged helix family	7.6041e-05	decreased coverage	COG3903
Actinosynnema mirum DSM 43827	446462	NC_013093	Amir_3358	hypothetical protein	0.00327264	decreased coverage	\N
Actinosynnema mirum DSM 43827	446462	NC_013093	Amir_3397	Amidohydrolase 3	0.00503125	decreased coverage	COG1574
Actinosynnema mirum DSM 43827	446462	NC_013093	Amir_3441	monooxygenase FAD-binding	6.58933e-07	decreased coverage	COG0654
Actinosynnema mirum DSM 43827	446462	NC_013093	Amir_3442	transcriptional regulator, DeoR family	1.77835e-07	decreased coverage	COG1349
Actinosynnema mirum DSM 43827	446462	NC_013093	Amir_3453	peptidase S9 prolyl oligopeptidase active site domain protein	2.52279e-07	unclonable	COG1506
Actinosynnema mirum DSM 43827	446462	NC_013093	Amir_3454	peptidase U61 LD-carboxypeptidase A	1.29902e-07	decreased coverage	COG1619
Actinosynnema mirum DSM 43827	446462	NC_013093	Amir_3455	hypothetical protein	1.27896e-08	decreased coverage	\N
Actinosynnema mirum DSM 43827	446462	NC_013093	Amir_3456	hypothetical protein	4.30117e-08	decreased coverage	\N
Actinosynnema mirum DSM 43827	446462	NC_013093	Amir_3551	peptidase S8/S53 subtilisin kexin sedolisin	0.00861424	decreased coverage	COG1404
Actinosynnema mirum DSM 43827	446462	NC_013093	Amir_3567	Alpha/beta hydrolase fold-3 domain protein	0.000877582	decreased coverage	COG0657
Actinosynnema mirum DSM 43827	446462	NC_013093	Amir_3569	glycoside hydrolase family 43	0.0058203	decreased coverage	COG3507
Actinosynnema mirum DSM 43827	446462	NC_013093	Amir_3751	hypothetical protein	0.00297726	decreased coverage	\N
Actinosynnema mirum DSM 43827	446462	NC_013093	Amir_3770	major facilitator superfamily MFS_1	0.00377745	decreased coverage	COG2211
Actinosynnema mirum DSM 43827	446462	NC_013093	Amir_3771	Pyridoxal-dependent decarboxylase	0.0013231	decreased coverage	COG0076
Actinosynnema mirum DSM 43827	446462	NC_013093	Amir_3772	hypothetical protein	0.00313382	decreased coverage	\N
Actinosynnema mirum DSM 43827	446462	NC_013093	Amir_3783	hypothetical protein	0.00138484	decreased coverage	\N
Actinosynnema mirum DSM 43827	446462	NC_013093	Amir_3788	hypothetical protein	0.000908085	decreased coverage	\N
Actinosynnema mirum DSM 43827	446462	NC_013093	Amir_3842	putative signal transduction protein with EFhand domain	0.00258503	decreased coverage	COG5126
Actinosynnema mirum DSM 43827	446462	NC_013093	Amir_3864	protein of unknown function DUF181	1.34117e-07	unclonable	COG1944
Actinosynnema mirum DSM 43827	446462	NC_013093	Amir_3865	hypothetical protein	2.12347e-08	unclonable	\N
Actinosynnema mirum DSM 43827	446462	NC_013093	Amir_3866	hypothetical protein	7.13597e-08	unclonable	\N
Actinosynnema mirum DSM 43827	446462	NC_013093	Amir_3867	putative transcriptional regulator, TetR family	3.71985e-09	unclonable	COG1309
Actinosynnema mirum DSM 43827	446462	NC_013093	Amir_3868	putative esterase	5.71996e-09	unclonable	COG2819
Actinosynnema mirum DSM 43827	446462	NC_013093	Amir_3869	hypothetical protein	8.20088e-09	unclonable	\N
Actinosynnema mirum DSM 43827	446462	NC_013093	Amir_3911	transport system permease protein	1.92945e-06	decreased coverage	COG0609
Actinosynnema mirum DSM 43827	446462	NC_013093	Amir_3912	periplasmic binding protein	2.29928e-07	decreased coverage	COG0614
Actinosynnema mirum DSM 43827	446462	NC_013093	Amir_3950	hypothetical protein	0.00763175	decreased coverage	\N
Actinosynnema mirum DSM 43827	446462	NC_013093	Amir_4022	hypothetical protein	0.000110855	decreased coverage	\N
Actinosynnema mirum DSM 43827	446462	NC_013093	Amir_4051	two component transcriptional regulator, LuxR family	0.00308286	decreased coverage	COG2197
Actinosynnema mirum DSM 43827	446462	NC_013093	Amir_4072	protein of unknown function DUF214	3.14908e-05	decreased coverage	COG0577
Actinosynnema mirum DSM 43827	446462	NC_013093	Amir_4166	D-isomer specific 2-hydroxyacid dehydrogenase NAD-binding	1.09629e-08	unclonable	COG0111
Actinosynnema mirum DSM 43827	446462	NC_013093	Amir_4167	hypothetical protein	2.67335e-08	unclonable	\N
Actinosynnema mirum DSM 43827	446462	NC_013093	Amir_4252	hypothetical protein	0.00339299	decreased coverage	\N
Actinosynnema mirum DSM 43827	446462	NC_013093	Amir_4253	Galactoside O-acetyltransferase	0.00506408	decreased coverage	COG0110
Actinosynnema mirum DSM 43827	446462	NC_013093	Amir_4267	hypothetical protein	0.00850389	decreased coverage	\N
Actinosynnema mirum DSM 43827	446462	NC_013093	Amir_4360	glycosyl transferase family 28	4.48703e-06	decreased coverage	COG1819
Actinosynnema mirum DSM 43827	446462	NC_013093	Amir_4411	\N	0.000691245	decreased coverage	COG4222
Actinosynnema mirum DSM 43827	446462	NC_013093	Amir_4519	hypothetical protein	0.00148768	decreased coverage	\N
Actinosynnema mirum DSM 43827	446462	NC_013093	Amir_4520	hypothetical protein	0.00166177	decreased coverage	\N
Actinosynnema mirum DSM 43827	446462	NC_013093	Amir_4542	hypothetical protein	0.00934764	decreased coverage	\N
Actinosynnema mirum DSM 43827	446462	NC_013093	Amir_4738	hypothetical protein	3.91664e-05	decreased coverage	\N
Actinosynnema mirum DSM 43827	446462	NC_013093	Amir_4821	glycerate kinase	3.02317e-06	decreased coverage	COG1929
Actinosynnema mirum DSM 43827	446462	NC_013093	Amir_4823	hypothetical protein	8.42276e-07	decreased coverage	\N
Actinosynnema mirum DSM 43827	446462	NC_013093	Amir_4834	cytochrome P450	5.0774e-05	decreased coverage	COG2124
Actinosynnema mirum DSM 43827	446462	NC_013093	Amir_4835	hypothetical protein	0.000158246	decreased coverage	\N
Actinosynnema mirum DSM 43827	446462	NC_013093	Amir_4836	glycosyl transferase family 2	4.03923e-05	decreased coverage	COG0463
Actinosynnema mirum DSM 43827	446462	NC_013093	Amir_4870	LamG domain protein jellyroll fold domain protein	0.000290642	decreased coverage	\N
Actinosynnema mirum DSM 43827	446462	NC_013093	Amir_4911	Beta-ketoacyl synthase	0.000703058	unclonable	COG3321
Actinosynnema mirum DSM 43827	446462	NC_013093	Amir_4915	aldo/keto reductase	5.79413e-05	decreased coverage	COG0667
Actinosynnema mirum DSM 43827	446462	NC_013093	Amir_4940	transcriptional regulator, LysR family	9.53992e-06	decreased coverage	COG0583
Actinosynnema mirum DSM 43827	446462	NC_013093	Amir_4941	hypothetical protein	2.21953e-06	decreased coverage	\N
Actinosynnema mirum DSM 43827	446462	NC_013093	Amir_4942	short-chain dehydrogenase/reductase SDR	1.2318e-05	decreased coverage	COG1028
Actinosynnema mirum DSM 43827	446462	NC_013093	Amir_4950	CDP-alcohol phosphatidyltransferase	1.01187e-08	unclonable	COG0558
Actinosynnema mirum DSM 43827	446462	NC_013093	Amir_4959	hypothetical protein	0.00651235	decreased coverage	COG1807
Actinosynnema mirum DSM 43827	446462	NC_013093	Amir_5060	Mandelate racemase/muconate lactonizing protein	5.50231e-07	decreased coverage	COG4948
Actinosynnema mirum DSM 43827	446462	NC_013093	Amir_5090	protein serine/threonine phosphatase	0.000290329	decreased coverage	COG2208
Actinosynnema mirum DSM 43827	446462	NC_013093	Amir_5212	Helix-turn-helix type 11 domain protein	0.000701081	decreased coverage	COG2378
Actinosynnema mirum DSM 43827	446462	NC_013093	Amir_5299	hypothetical protein	0.000634886	decreased coverage	\N
Actinosynnema mirum DSM 43827	446462	NC_013093	Amir_5315	transcriptional regulator, LuxR family	0.00819594	decreased coverage	COG3899
Actinosynnema mirum DSM 43827	446462	NC_013093	Amir_5434	NUDIX hydrolase	0.000494994	decreased coverage	COG0494
Actinosynnema mirum DSM 43827	446462	NC_013093	Amir_5459	transposase IS4 family protein	0.00365854	decreased coverage	COG3293
Actinosynnema mirum DSM 43827	446462	NC_013093	Amir_5486	beta-lactamase domain protein	6.86385e-08	decreased coverage	COG0491
Actinosynnema mirum DSM 43827	446462	NC_013093	Amir_5500	helix-turn-helix domain protein	1.65306e-08	unclonable	\N
Actinosynnema mirum DSM 43827	446462	NC_013093	Amir_5501	protein of unknown function DUF540	3.95042e-09	unclonable	COG2981
Actinosynnema mirum DSM 43827	446462	NC_013093	Amir_5780	hypothetical protein	1.90201e-08	unclonable	\N
Actinosynnema mirum DSM 43827	446462	NC_013093	Amir_5781	hypothetical protein	1.16441e-08	unclonable	\N
Actinosynnema mirum DSM 43827	446462	NC_013093	Amir_5849	hypothetical protein	0.000227019	decreased coverage	COG3022
Actinosynnema mirum DSM 43827	446462	NC_013093	Amir_6166	transcriptional regulator, SARP family	0.000170258	decreased coverage	COG3629,COG3899
Actinosynnema mirum DSM 43827	446462	NC_013093	Amir_6389	biotin/acetyl-CoA-carboxylase ligase	0.00441767	decreased coverage	COG0340
Actinosynnema mirum DSM 43827	446462	NC_013093	Amir_6629	hypothetical protein	0.000250395	decreased coverage	\N
Actinosynnema mirum DSM 43827	446462	NC_013093	Amir_6630	ABC-type transport system involved in resistance to organic solvents periplasmic component	0.000794553	decreased coverage	COG1463
Actinosynnema mirum DSM 43827	446462	NC_013093	Amir_6786	protein of unknown function DUF214	0.00462962	decreased coverage	COG3127
Actinosynnema mirum DSM 43827	446462	NC_013093	Amir_6855	peptidyl-tRNA hydrolase domain protein	0.000218203	decreased coverage	COG1186
Actinosynnema mirum DSM 43827	446462	NC_013093	Amir_7013	hypothetical protein	0.00663505	decreased coverage	COG0071
Actinosynnema mirum DSM 43827	446462	NC_013093	Amir_R0050	tRNA-His	0.000553151	decreased coverage	\N
Actinosynnema mirum DSM 43827	446462	NC_013093	Amir_R0054	tRNA-Ala	0.00173253	decreased coverage	\N
Akkermansia muciniphila ATCC BAA-835	349741	NC_010655	Amuc_0057	UvrB/UvrC protein	0.00323429	decreased coverage	COG3880
Akkermansia muciniphila ATCC BAA-835	349741	NC_010655	Amuc_0058	ATP:guanido phosphotransferase	0.00335671	decreased coverage	COG3869
Akkermansia muciniphila ATCC BAA-835	349741	NC_010655	Amuc_0075	PfkB domain protein	5.23624e-08	unclonable	COG0524
Akkermansia muciniphila ATCC BAA-835	349741	NC_010655	Amuc_0198	ribosomal protein L19	4.92639e-09	unclonable	COG0335
Akkermansia muciniphila ATCC BAA-835	349741	NC_010655	Amuc_0270	Shikimate kinase	2.87272e-07	decreased coverage	COG0703
Akkermansia muciniphila ATCC BAA-835	349741	NC_010655	Amuc_0280	ribonuclease HIII	7.20364e-06	decreased coverage	COG1039
Akkermansia muciniphila ATCC BAA-835	349741	NC_010655	Amuc_0281	histone family protein DNA-binding protein	5.12973e-09	unclonable	COG0776
Akkermansia muciniphila ATCC BAA-835	349741	NC_010655	Amuc_0282	hypothetical protein	2.54697e-06	decreased coverage	\N
Akkermansia muciniphila ATCC BAA-835	349741	NC_010655	Amuc_0307	30S ribosomal protein S7	2.18135e-07	decreased coverage	COG0049
Akkermansia muciniphila ATCC BAA-835	349741	NC_010655	Amuc_0308	30S ribosomal protein S12	7.73303e-09	unclonable	COG0048
Akkermansia muciniphila ATCC BAA-835	349741	NC_010655	Amuc_0327	hypothetical protein	0.00725297	decreased coverage	\N
Akkermansia muciniphila ATCC BAA-835	349741	NC_010655	Amuc_0328	hypothetical protein	0.00012649	decreased coverage	COG1196
Akkermansia muciniphila ATCC BAA-835	349741	NC_010655	Amuc_0371	two component regulator propeller domain protein	8.33804e-06	unclonable	COG3292
Akkermansia muciniphila ATCC BAA-835	349741	NC_010655	Amuc_0386	hypothetical protein	0.00110205	decreased coverage	\N
Akkermansia muciniphila ATCC BAA-835	349741	NC_010655	Amuc_0436	HAD-superfamily subfamily IB hydrolase, TIGR01490	4.08173e-07	decreased coverage	COG0560
Akkermansia muciniphila ATCC BAA-835	349741	NC_010655	Amuc_0544	Tetratricopeptide TPR_2 repeat protein	3.21228e-05	unclonable	COG1729
Akkermansia muciniphila ATCC BAA-835	349741	NC_010655	Amuc_0545	hypothetical protein	0.000789801	decreased coverage	\N
Akkermansia muciniphila ATCC BAA-835	349741	NC_010655	Amuc_0717	amino acid permease-associated region	1.67398e-06	decreased coverage	COG1113
Akkermansia muciniphila ATCC BAA-835	349741	NC_010655	Amuc_0718	HAD-superfamily hydrolase, subfamily IA, variant 1	2.86264e-06	decreased coverage	COG0546
Akkermansia muciniphila ATCC BAA-835	349741	NC_010655	Amuc_0799	pyruvate flavodoxin/ferredoxin oxidoreductase domain protein	7.6441e-05	unclonable	COG0674,COG1013
Akkermansia muciniphila ATCC BAA-835	349741	NC_010655	Amuc_0824	glycoside hydrolase family 2 TIM barrel	9.54733e-05	unclonable	COG3250
Akkermansia muciniphila ATCC BAA-835	349741	NC_010655	Amuc_0889	efflux transporter, RND family, MFP subunit	7.56331e-07	decreased coverage	COG0845
Akkermansia muciniphila ATCC BAA-835	349741	NC_010655	Amuc_0925	KOW domain protein	6.00412e-07	decreased coverage	COG0198
Akkermansia muciniphila ATCC BAA-835	349741	NC_010655	Amuc_0926	ribosomal protein L5	2.08834e-06	decreased coverage	COG0094
Akkermansia muciniphila ATCC BAA-835	349741	NC_010655	Amuc_0970	SSS sodium solute transporter superfamily	0.000363528	decreased coverage	COG4146
Akkermansia muciniphila ATCC BAA-835	349741	NC_010655	Amuc_1046	NusG antitermination factor	1.49181e-07	decreased coverage	COG0250
Akkermansia muciniphila ATCC BAA-835	349741	NC_010655	Amuc_1047	preprotein translocase, SecE subunit	5.68369e-08	decreased coverage	\N
Akkermansia muciniphila ATCC BAA-835	349741	NC_010655	Amuc_1048	elongation factor Tu	7.67064e-08	unclonable	COG0050
Akkermansia muciniphila ATCC BAA-835	349741	NC_010655	Amuc_1085	Carbohydrate-selective porin OprB	1.16954e-07	unclonable	\N
Akkermansia muciniphila ATCC BAA-835	349741	NC_010655	Amuc_1086	hypothetical protein	8.29745e-09	unclonable	\N
Akkermansia muciniphila ATCC BAA-835	349741	NC_010655	Amuc_1095	heavy metal translocating P-type ATPase	1.23465e-05	decreased coverage	COG2217
Akkermansia muciniphila ATCC BAA-835	349741	NC_010655	Amuc_1096	transcription termination factor Rho	2.20234e-06	decreased coverage	COG1158
Akkermansia muciniphila ATCC BAA-835	349741	NC_010655	Amuc_1189	50S ribosomal protein L28	4.38944e-08	decreased coverage	COG0227
Akkermansia muciniphila ATCC BAA-835	349741	NC_010655	Amuc_1234	ribosomal protein L13	0.00635155	decreased coverage	COG0102
Akkermansia muciniphila ATCC BAA-835	349741	NC_010655	Amuc_1255	protein of unknown function DUF37	2.04155e-09	unclonable	COG0759
Akkermansia muciniphila ATCC BAA-835	349741	NC_010655	Amuc_1256	ribonuclease P protein component	2.86956e-09	unclonable	COG0594
Akkermansia muciniphila ATCC BAA-835	349741	NC_010655	Amuc_1257	ribosomal protein L34	1.62136e-09	unclonable	\N
Akkermansia muciniphila ATCC BAA-835	349741	NC_010655	Amuc_1352	hypothetical protein	0.000463404	decreased coverage	\N
Akkermansia muciniphila ATCC BAA-835	349741	NC_010655	Amuc_1367	prophage antirepressor	2.14644e-08	unclonable	COG3617
Akkermansia muciniphila ATCC BAA-835	349741	NC_010655	Amuc_1396	aspartyl-tRNA synthetase	0.000259545	decreased coverage	COG0173
Akkermansia muciniphila ATCC BAA-835	349741	NC_010655	Amuc_1411	hypothetical protein	2.37297e-05	decreased coverage	\N
Akkermansia muciniphila ATCC BAA-835	349741	NC_010655	Amuc_1519	helicase domain protein	0.00298818	decreased coverage	COG0553
Akkermansia muciniphila ATCC BAA-835	349741	NC_010655	Amuc_1520	hypothetical protein	3.78207e-06	decreased coverage	\N
Akkermansia muciniphila ATCC BAA-835	349741	NC_010655	Amuc_1539	homoserine O-acetyltransferase	1.20571e-07	unclonable	COG2021
Akkermansia muciniphila ATCC BAA-835	349741	NC_010655	Amuc_1686	Beta-galactosidase	0.00233252	decreased coverage	COG1874
Akkermansia muciniphila ATCC BAA-835	349741	NC_010655	Amuc_1714	Histidinol dehydrogenase	1.3465e-07	unclonable	COG0141
Akkermansia muciniphila ATCC BAA-835	349741	NC_010655	Amuc_1769	Non-specific serine/threonine protein kinase	8.89358e-05	unclonable	COG0553
Akkermansia muciniphila ATCC BAA-835	349741	NC_010655	Amuc_1813	MATE efflux family protein	1.45997e-07	unclonable	COG0534
Akkermansia muciniphila ATCC BAA-835	349741	NC_010655	Amuc_1829	class II aldolase/adducin family protein	0.00738652	decreased coverage	COG0235
Akkermansia muciniphila ATCC BAA-835	349741	NC_010655	Amuc_2015	thiamine-phosphate pyrophosphorylase	0.0030252	decreased coverage	COG0352
Akkermansia muciniphila ATCC BAA-835	349741	NC_010655	Amuc_R0006	tRNA-Leu	5.31495e-08	decreased coverage	\N
Akkermansia muciniphila ATCC BAA-835	349741	NC_010655	Amuc_R0033	tRNA-Trp	3.98886e-08	decreased coverage	\N
Anaeromyxobacter sp. Fw109-5	404589	NC_009675	Anae109_0106	integral membrane sensor signal transduction histidine kinase	0.00764508	decreased coverage	COG0642
Anaeromyxobacter sp. Fw109-5	404589	NC_009675	Anae109_0135	glycoside hydrolase family protein	9.20685e-05	decreased coverage	COG1449
Anaeromyxobacter sp. Fw109-5	404589	NC_009675	Anae109_0281	methylmalonyl-CoA mutase, large subunit	0.000219849	decreased coverage	COG1884
Anaeromyxobacter sp. Fw109-5	404589	NC_009675	Anae109_0317	maltooligosyl trehalose synthase	0.0021368	decreased coverage	COG3280
Anaeromyxobacter sp. Fw109-5	404589	NC_009675	Anae109_0332	OPT family oligopeptide transporter	0.00861331	decreased coverage	COG1297
Anaeromyxobacter sp. Fw109-5	404589	NC_009675	Anae109_0358	TPR repeat-containing protein	0.00659721	decreased coverage	\N
Anaeromyxobacter sp. Fw109-5	404589	NC_009675	Anae109_0444	uracil-DNA glycosylase superfamily protein	0.00359006	decreased coverage	COG1573
Anaeromyxobacter sp. Fw109-5	404589	NC_009675	Anae109_0614	putative GAF sensor protein	0.00376401	decreased coverage	COG2204
Anaeromyxobacter sp. Fw109-5	404589	NC_009675	Anae109_0666	riboflavin biosynthesis protein RibF	0.000211041	decreased coverage	COG0196
Anaeromyxobacter sp. Fw109-5	404589	NC_009675	Anae109_0716	glycosyl transferase family protein	0.000599057	decreased coverage	COG0463
Anaeromyxobacter sp. Fw109-5	404589	NC_009675	Anae109_0764	ribonuclease H	0.00463107	decreased coverage	COG0328
Anaeromyxobacter sp. Fw109-5	404589	NC_009675	Anae109_0805	transporter DMT superfamily protein	0.00148413	decreased coverage	COG2962
Anaeromyxobacter sp. Fw109-5	404589	NC_009675	Anae109_0874	ICE-like protease	0.00749471	decreased coverage	\N
Anaeromyxobacter sp. Fw109-5	404589	NC_009675	Anae109_0914	hypothetical protein	1.26609e-05	decreased coverage	\N
Anaeromyxobacter sp. Fw109-5	404589	NC_009675	Anae109_0981	cytochrome bd ubiquinol oxidase subunit I	0.00380609	decreased coverage	COG1271
Anaeromyxobacter sp. Fw109-5	404589	NC_009675	Anae109_0982	cytochrome bd ubiquinol oxidase subunit II	0.00231711	decreased coverage	COG1294
Anaeromyxobacter sp. Fw109-5	404589	NC_009675	Anae109_0991	major facilitator transporter	0.00118055	decreased coverage	COG2814
Anaeromyxobacter sp. Fw109-5	404589	NC_009675	Anae109_1372	thioredoxin	0.00473089	decreased coverage	COG3118
Anaeromyxobacter sp. Fw109-5	404589	NC_009675	Anae109_1518	(dimethylallyl)adenosine tRNA methylthiotransferase	9.84197e-06	decreased coverage	COG0621
Anaeromyxobacter sp. Fw109-5	404589	NC_009675	Anae109_1612	hypothetical protein	0.00192145	decreased coverage	COG0217
Anaeromyxobacter sp. Fw109-5	404589	NC_009675	Anae109_1655	cytochrome bd ubiquinol oxidase subunit I	0.00557901	decreased coverage	COG1271
Anaeromyxobacter sp. Fw109-5	404589	NC_009675	Anae109_1773	hypothetical protein	0.00954847	decreased coverage	COG4591
Anaeromyxobacter sp. Fw109-5	404589	NC_009675	Anae109_2142	histidine kinase	0.000590991	decreased coverage	COG0642
Anaeromyxobacter sp. Fw109-5	404589	NC_009675	Anae109_2143	hypothetical protein	6.27943e-05	decreased coverage	\N
Anaeromyxobacter sp. Fw109-5	404589	NC_009675	Anae109_2286	cupin 2 domain-containing protein	0.00929016	decreased coverage	COG0662
Anaeromyxobacter sp. Fw109-5	404589	NC_009675	Anae109_2456	FHA domain-containing protein	0.00798291	decreased coverage	COG1716
Anaeromyxobacter sp. Fw109-5	404589	NC_009675	Anae109_2628	glycosyl transferase group 1	0.00259804	decreased coverage	COG0438
Anaeromyxobacter sp. Fw109-5	404589	NC_009675	Anae109_3003	aldehyde dehydrogenase	2.80927e-05	decreased coverage	COG1012
Anaeromyxobacter sp. Fw109-5	404589	NC_009675	Anae109_3076	FAD dependent oxidoreductase	0.00183108	decreased coverage	COG2303
Anaeromyxobacter sp. Fw109-5	404589	NC_009675	Anae109_3108	multicopper oxidase type 2	0.00507653	decreased coverage	\N
Anaeromyxobacter sp. Fw109-5	404589	NC_009675	Anae109_3400	HNH endonuclease	0.00340791	decreased coverage	\N
Anaeromyxobacter sp. Fw109-5	404589	NC_009675	Anae109_3408	histidine kinase	0.0068838	decreased coverage	COG5000
Anaeromyxobacter sp. Fw109-5	404589	NC_009675	Anae109_3753	deaminase-reductase domain-containing protein	0.00221324	decreased coverage	COG0262
Anaeromyxobacter sp. Fw109-5	404589	NC_009675	Anae109_4208	amidohydrolase	0.00909299	decreased coverage	COG0402
Anaeromyxobacter sp. Fw109-5	404589	NC_009675	Anae109_4280	hypothetical protein	0.00356586	decreased coverage	\N
Anaeromyxobacter sp. K	447217	NC_011145	AnaeK_0710	hypothetical protein	0.00400804	decreased coverage	\N
Anaeromyxobacter sp. K	447217	NC_011145	AnaeK_0711	hypothetical protein	0.00618028	decreased coverage	\N
Anaeromyxobacter sp. K	447217	NC_011145	AnaeK_0713	hypothetical protein	0.00484228	decreased coverage	\N
Anaeromyxobacter sp. K	447217	NC_011145	AnaeK_0765	hypothetical protein	0.00448786	decreased coverage	COG5373
Anaeromyxobacter sp. K	447217	NC_011145	AnaeK_0784	CRISPR-associated protein Cas1	0.00721188	decreased coverage	COG1518
Anaeromyxobacter sp. K	447217	NC_011145	AnaeK_0807	RarD protein, DMT superfamily transporter	0.00187361	decreased coverage	COG2962
Anaeromyxobacter sp. K	447217	NC_011145	AnaeK_0822	heat shock protein DnaJ domain protein	0.00264889	unclonable	\N
Anaeromyxobacter sp. K	447217	NC_011145	AnaeK_0903	pyridoxamine 5'-phosphate oxidase-related FMN-binding	0.00546716	decreased coverage	COG0748
Anaeromyxobacter sp. K	447217	NC_011145	AnaeK_0945	hypothetical protein	0.00380617	decreased coverage	\N
Anaeromyxobacter sp. K	447217	NC_011145	AnaeK_0992	YceI family protein	0.00460227	decreased coverage	COG2353
Anaeromyxobacter sp. K	447217	NC_011145	AnaeK_0993	Extradiol ring-cleavage dioxygenase class III protein subunit B	0.00681173	decreased coverage	COG3384
Anaeromyxobacter sp. K	447217	NC_011145	AnaeK_1121	Alcohol dehydrogenase zinc-binding domain protein	0.00941244	decreased coverage	COG1063
Anaeromyxobacter sp. K	447217	NC_011145	AnaeK_1134	hypothetical protein	0.00871122	decreased coverage	COG3330
Anaeromyxobacter sp. K	447217	NC_011145	AnaeK_1386	hypothetical protein	0.00598227	decreased coverage	\N
Anaeromyxobacter sp. K	447217	NC_011145	AnaeK_1397	ABC-2 type transporter	0.00114129	decreased coverage	COG1682
Anaeromyxobacter sp. K	447217	NC_011145	AnaeK_1398	ABC transporter-related protein	0.00437719	decreased coverage	COG1134
Anaeromyxobacter sp. K	447217	NC_011145	AnaeK_1492	phosphopantothenoylcysteine decarboxylase/phosphopantothenate/cysteine ligase	0.00438441	decreased coverage	COG0452
Anaeromyxobacter sp. K	447217	NC_011145	AnaeK_1509	TonB family protein	0.00129543	decreased coverage	COG0810
Anaeromyxobacter sp. K	447217	NC_011145	AnaeK_1510	Biopolymer transport protein ExbD/TolR	0.00059438	decreased coverage	COG0848
Anaeromyxobacter sp. K	447217	NC_011145	AnaeK_1512	Ste24 endopeptidase	0.00450516	decreased coverage	COG0501
Anaeromyxobacter sp. K	447217	NC_011145	AnaeK_1639	hypothetical protein	0.000107287	unclonable	\N
Anaeromyxobacter sp. K	447217	NC_011145	AnaeK_1655	hypothetical protein	0.00579042	decreased coverage	\N
Anaeromyxobacter sp. K	447217	NC_011145	AnaeK_1670	PKD domain containing protein	0.00387943	unclonable	\N
Anaeromyxobacter sp. K	447217	NC_011145	AnaeK_1677	hypothetical protein	0.00196958	decreased coverage	\N
Anaeromyxobacter sp. K	447217	NC_011145	AnaeK_1678	oxidoreductase	0.00133842	unclonable	COG1028
Anaeromyxobacter sp. K	447217	NC_011145	AnaeK_1683	cytochrome c assembly protein	0.00910499	unclonable	COG0755
Anaeromyxobacter sp. K	447217	NC_011145	AnaeK_1709	hypothetical protein	0.0053762	decreased coverage	\N
Anaeromyxobacter sp. K	447217	NC_011145	AnaeK_1733	outer membrane lipoprotein, putative	0.00359299	decreased coverage	COG3133
Anaeromyxobacter sp. K	447217	NC_011145	AnaeK_1773	cytochrome c assembly protein	0.00408104	unclonable	COG0755
Anaeromyxobacter sp. K	447217	NC_011145	AnaeK_1879	hypothetical protein	0.00409947	decreased coverage	\N
Anaeromyxobacter sp. K	447217	NC_011145	AnaeK_1969	hypothetical protein	0.00399816	decreased coverage	COG0792
Anaeromyxobacter sp. K	447217	NC_011145	AnaeK_2040	serine/threonine protein kinase	0.00475654	decreased coverage	COG0515
Anaeromyxobacter sp. K	447217	NC_011145	AnaeK_2123	aminotransferase class I and II	0.00510874	decreased coverage	COG0436
Anaeromyxobacter sp. K	447217	NC_011145	AnaeK_2212	Propionyl-CoA carboxylase	0.000980367	unclonable	COG4799
Anaeromyxobacter sp. K	447217	NC_011145	AnaeK_2225	hypothetical protein	0.00433627	unclonable	COG5373
Anaeromyxobacter sp. K	447217	NC_011145	AnaeK_2232	succinyl-CoA synthetase, alpha subunit	0.00256463	decreased coverage	COG0074
Anaeromyxobacter sp. K	447217	NC_011145	AnaeK_2299	small GTP-binding protein	0.00736056	unclonable	COG0370
Anaeromyxobacter sp. K	447217	NC_011145	AnaeK_2363	hypothetical protein	0.00416749	decreased coverage	\N
Anaeromyxobacter sp. K	447217	NC_011145	AnaeK_2374	hypothetical protein	0.00210499	decreased coverage	\N
Anaeromyxobacter sp. K	447217	NC_011145	AnaeK_2409	hypothetical protein	0.00628306	decreased coverage	\N
Anaeromyxobacter sp. K	447217	NC_011145	AnaeK_2450	protein of unknown function DUF323	0.00600286	decreased coverage	COG1262
Anaeromyxobacter sp. K	447217	NC_011145	AnaeK_2463	\N	0.00094172	unclonable	COG1766
Anaeromyxobacter sp. K	447217	NC_011145	AnaeK_2465	flagellar assembly protein FliH	0.000780406	decreased coverage	COG1317
Anaeromyxobacter sp. K	447217	NC_011145	AnaeK_2488	hypothetical protein	0.00975112	decreased coverage	\N
Anaeromyxobacter sp. K	447217	NC_011145	AnaeK_2506	flagellar basal-body rod protein FlgG	0.0019956	decreased coverage	COG4786
Anaeromyxobacter sp. K	447217	NC_011145	AnaeK_2513	flagellar hook-associated protein FlgK	0.00819132	decreased coverage	COG1256
Anaeromyxobacter sp. K	447217	NC_011145	AnaeK_2519	flagellin domain protein	0.000201488	unclonable	COG1344
Anaeromyxobacter sp. K	447217	NC_011145	AnaeK_2544	HAD-superfamily subfamily IB hydrolase, TIGR01490	0.00145664	decreased coverage	COG0560
Anaeromyxobacter sp. K	447217	NC_011145	AnaeK_2555	glycyl-tRNA synthetase subunit alpha	0.00956697	decreased coverage	COG0752
Anaeromyxobacter sp. K	447217	NC_011145	AnaeK_2560	hypothetical protein	0.000532786	decreased coverage	\N
Anaeromyxobacter sp. K	447217	NC_011145	AnaeK_2561	hypothetical protein	0.00464069	decreased coverage	\N
Anaeromyxobacter sp. K	447217	NC_011145	AnaeK_2562	Radical SAM domain protein	0.00464069	decreased coverage	COG0602
Anaeromyxobacter sp. K	447217	NC_011145	AnaeK_2598	adenylosuccinate synthetase	0.0051551	decreased coverage	COG0104
Anaeromyxobacter sp. K	447217	NC_011145	AnaeK_2672	H+transporting two-sector ATPase C subunit	0.000356712	decreased coverage	\N
Anaeromyxobacter sp. K	447217	NC_011145	AnaeK_2736	lipopolysaccharide biosynthesis protein	0.00743206	decreased coverage	COG3206
Anaeromyxobacter sp. K	447217	NC_011145	AnaeK_2747	ABC transporter-related protein	0.00686798	decreased coverage	COG1136
Anaeromyxobacter sp. K	447217	NC_011145	AnaeK_2799	hypothetical protein	0.00757414	decreased coverage	\N
Anaeromyxobacter sp. K	447217	NC_011145	AnaeK_2890	RNA polymerase, sigma-24 subunit, ECF subfamily	0.00371276	decreased coverage	\N
Anaeromyxobacter sp. K	447217	NC_011145	AnaeK_2948	sodium:dicarboxylate symporter	0.00484228	decreased coverage	COG1301
Anaeromyxobacter sp. K	447217	NC_011145	AnaeK_2950	protein of unknown function UPF0153	0.0053762	decreased coverage	\N
Anaeromyxobacter sp. K	447217	NC_011145	AnaeK_2951	protein of unknown function DUF224 cysteine-rich region domain protein	0.00704386	decreased coverage	COG0247
Anaeromyxobacter sp. K	447217	NC_011145	AnaeK_2984	NAD-dependent epimerase/dehydratase	0.00120492	decreased coverage	COG0451
Anaeromyxobacter sp. K	447217	NC_011145	AnaeK_3022	hypothetical protein	0.00904522	decreased coverage	\N
Anaeromyxobacter sp. K	447217	NC_011145	AnaeK_3289	\N	0.00553872	decreased coverage	COG1473
Anaeromyxobacter sp. K	447217	NC_011145	AnaeK_3425	Dipeptidyl-peptidase 7. Serine peptidase. MEROPS family S46	0.00839556	unclonable	\N
Anaeromyxobacter sp. K	447217	NC_011145	AnaeK_3550	HNH nuclease	0.00633328	decreased coverage	\N
Anaeromyxobacter sp. K	447217	NC_011145	AnaeK_3609	response regulator receiver protein	0.00744744	decreased coverage	COG0745
Anaeromyxobacter sp. K	447217	NC_011145	AnaeK_3717	NADH-ubiquinone oxidoreductase chain 49kDa	0.000990438	unclonable	COG3261
Anaeromyxobacter sp. K	447217	NC_011145	AnaeK_3749	protein serine/threonine phosphatase	0.00230331	decreased coverage	COG0631
Anaeromyxobacter sp. K	447217	NC_011145	AnaeK_4148	General secretory system II protein E domain protein	0.00811827	decreased coverage	\N
Anaeromyxobacter sp. K	447217	NC_011145	AnaeK_4357	hypothetical protein	0.00560456	decreased coverage	\N
Anaeromyxobacter sp. K	447217	NC_011145	AnaeK_4358	histidine kinase	0.00933399	decreased coverage	COG0642
Anaeromyxobacter sp. K	447217	NC_011145	AnaeK_R0022	tRNA-Sec	0.00457339	decreased coverage	\N
Aspergillus nidulans FGSC A4	227321	BN001308	ANIA_00004	conserved hypothetical protein	0.00275092	unclonable	\N
Aspergillus nidulans FGSC A4	227321	BN001308	ANIA_00144	serine/threonine protein kinase (Nrc-2), putative (AFU_orthologue; AFUA_5G11520)	9.50101e-06	decreased coverage	\N
Aspergillus nidulans FGSC A4	227321	BN001308	ANIA_00163	rho-gdp dissociation inhibitor (AFU_orthologue; AFUA_5G11380)	1.41551e-06	decreased coverage	\N
Aspergillus nidulans FGSC A4	227321	BN001308	ANIA_00164	hypothetical protein similar to ser/Thr protein phosphatase (Broad)	0.000203729	decreased coverage	\N
Aspergillus nidulans FGSC A4	227321	BN001308	ANIA_00217	phosphate permease (AFU_orthologue; AFUA_5G01320)	0.00909973	decreased coverage	\N
Aspergillus nidulans FGSC A4	227321	BN001308	ANIA_00243	phosphatidylinositol transporter, putative (AFU_orthologue; AFUA_5G09260)	3.50361e-13	unclonable	\N
Aspergillus nidulans FGSC A4	227321	BN001308	ANIA_00264	hypothetical protein	0.00072616	decreased coverage	\N
Aspergillus nidulans FGSC A4	227321	BN001308	ANIA_00289	cell cycle control protein (Cwf22), putative (AFU_orthologue; AFUA_1G03010)	0.000674874	decreased coverage	\N
Aspergillus nidulans FGSC A4	227321	BN001308	ANIA_00299	class V chitinase, putative (AFU_orthologue; AFUA_1G02800)	0.00128486	decreased coverage	\N
Aspergillus nidulans FGSC A4	227321	BN001308	ANIA_00338	cytochrome P450, putative (Eurofung)	4.50285e-05	decreased coverage	\N
Aspergillus nidulans FGSC A4	227321	BN001308	ANIA_00410	Serine/threonine-protein phosphatase PP1 (EC 3.1.3.16) [Source:UniProtKB/Swiss-Prot;Acc:P20654]	0.0016522	decreased coverage	\N
Aspergillus nidulans FGSC A4	227321	BN001308	ANIA_00414	calmodulin-binding protein Sha1, putative (AFU_orthologue; AFUA_1G04920)	0.00462741	decreased coverage	\N
Aspergillus nidulans FGSC A4	227321	BN001308	ANIA_00592	RNA binding protein MSSP-2, putative (AFU_orthologue; AFUA_6G11030)	1.79552e-06	decreased coverage	\N
Aspergillus nidulans FGSC A4	227321	BN001308	ANIA_00634	ADP-ribosylation factor family protein (AFU_orthologue; AFUA_1G16970)	0.00256949	decreased coverage	\N
Aspergillus nidulans FGSC A4	227321	BN001308	ANIA_00641	Translationally-controlled tumor protein homolog (TCTP) [Source:UniProtKB/Swiss-Prot;Acc:Q5BFN9]	0.000197492	decreased coverage	\N
Aspergillus nidulans FGSC A4	227321	BN001308	ANIA_00761	conserved hypothetical protein	0.00390915	decreased coverage	\N
Aspergillus nidulans FGSC A4	227321	BN001308	ANIA_00778	chitin binding protein, putative (AFU_orthologue; AFUA_1G14430)	0.000546999	decreased coverage	\N
Aspergillus nidulans FGSC A4	227321	BN001308	ANIA_00811	MFS allantoate transporter, putative (AFU_orthologue; AFUA_1G14700)	1.61001e-05	decreased coverage	\N
Aspergillus nidulans FGSC A4	227321	BN001308	ANIA_00884	conserved hypothetical protein	0.00135266	decreased coverage	\N
Aspergillus nidulans FGSC A4	227321	BN001308	ANIA_00906	Putative karyopherin/importin beta-1Putative uncharacterized protein ; [Source:UniProtKB/TrEMBL;Acc:Q7Z9L0]	0.00266285	decreased coverage	\N
Aspergillus nidulans FGSC A4	227321	BN001308	ANIA_00923	conserved glutamic acid-rich protein (AFU_orthologue; AFUA_1G15870)	0.00232149	decreased coverage	\N
Aspergillus nidulans FGSC A4	227321	BN001308	ANIA_00930	auxin efflux transporter family protein (Eurofung)	0.00307938	decreased coverage	\N
Aspergillus nidulans FGSC A4	227321	BN001308	ANIA_01115	nucleoside hydrolase, putative (AFU_orthologue; AFUA_1G11790)	0.000945493	decreased coverage	\N
Aspergillus nidulans FGSC A4	227321	BN001308	ANIA_01129	conserved hypothetical protein	0.00253051	decreased coverage	\N
Aspergillus nidulans FGSC A4	227321	BN001308	ANIA_01215	Myosin-related protein homolog MlpA Fragment [Source:UniProtKB/TrEMBL;Acc:Q9UVC7]	0.00107626	decreased coverage	\N
Aspergillus nidulans FGSC A4	227321	BN001308	ANIA_01323	conserved hypothetical protein	0.00496175	decreased coverage	\N
Aspergillus nidulans FGSC A4	227321	BN001308	ANIA_01343	NIF domain protein (AFU_orthologue; AFUA_1G09460)	3.75841e-06	decreased coverage	\N
Aspergillus nidulans FGSC A4	227321	BN001308	ANIA_01367	Ribosome biogenesis protein erb1 (Eukaryotic ribosome biogenesis protein 1) [Source:UniProtKB/Swiss-Prot;Acc:Q5BDL3]	0.000573535	decreased coverage	\N
Aspergillus nidulans FGSC A4	227321	BN001308	ANIA_01387	meiotic recombination protein Ski8/Rec14, putative (AFU_orthologue; AFUA_1G08860)	6.49458e-07	decreased coverage	\N
Aspergillus nidulans FGSC A4	227321	BN001307	ANIA_01543	hypothetical fumarate reductase (Eurofung)	0.000554356	decreased coverage	\N
Aspergillus nidulans FGSC A4	227321	BN001307	ANIA_01604	putative alpha 1,3 glucanase GH71 (Eurofung)	0.000126712	decreased coverage	\N
Aspergillus nidulans FGSC A4	227321	BN001307	ANIA_01627	hypothetical protein	0.000420501	decreased coverage	\N
Aspergillus nidulans FGSC A4	227321	BN001307	ANIA_01640	conserved hypothetical protein	0.00227991	decreased coverage	\N
Aspergillus nidulans FGSC A4	227321	BN001307	ANIA_01656	conserved hypothetical protein	8.98037e-06	decreased coverage	\N
Aspergillus nidulans FGSC A4	227321	BN001307	ANIA_01659	amino acid transporter (Eurofung)	0.00286365	decreased coverage	\N
Aspergillus nidulans FGSC A4	227321	BN001307	ANIA_01661	conserved hypothetical protein	0.000639839	decreased coverage	\N
Aspergillus nidulans FGSC A4	227321	BN001307	ANIA_01768	VHS domain protein (AFU_orthologue; AFUA_6G09080)	0.000645299	decreased coverage	\N
Aspergillus nidulans FGSC A4	227321	BN001307	ANIA_01813	conserved hypothetical protein	0.000356415	decreased coverage	\N
Aspergillus nidulans FGSC A4	227321	BN001307	ANIA_01821	FAD-binding monooxygenase, putative (AFU_orthologue; AFUA_8G07040)	0.00520599	decreased coverage	\N
Aspergillus nidulans FGSC A4	227321	BN001307	ANIA_01834	conserved hypothetical protein	0.000874174	decreased coverage	\N
Aspergillus nidulans FGSC A4	227321	BN001307	ANIA_01905	hypothetical protein	0.0086932	decreased coverage	\N
Aspergillus nidulans FGSC A4	227321	BN001307	ANIA_01952	conserved hypothetical protein	0.000481034	decreased coverage	\N
Aspergillus nidulans FGSC A4	227321	BN001307	ANIA_01970	50S ribosomal protein L24 (AFU_orthologue; AFUA_4G10740)	5.53302e-09	decreased coverage	\N
Aspergillus nidulans FGSC A4	227321	BN001307	ANIA_01995	conserved hypothetical protein	0.00680781	decreased coverage	\N
Aspergillus nidulans FGSC A4	227321	BN001307	ANIA_02012	RfeF [Source:UniProtKB/TrEMBL;Acc:Q8J174]	0.00625491	decreased coverage	\N
Aspergillus nidulans FGSC A4	227321	BN001307	ANIA_02048	SNARE complex subunit (Tlg2), putative (Eurofung)	0.000241869	decreased coverage	\N
Aspergillus nidulans FGSC A4	227321	BN001307	ANIA_02059	Putative uncharacterized proteinVelC ; [Source:UniProtKB/TrEMBL;Acc:Q5BBM1]	1.38964e-06	decreased coverage	\N
Aspergillus nidulans FGSC A4	227321	BN001307	ANIA_02067	Serine/threonine-protein kinase ste20 (EC 2.7.11.1) [Source:UniProtKB/Swiss-Prot;Acc:Q5BBL3]	0.00224499	decreased coverage	\N
Aspergillus nidulans FGSC A4	227321	BN001307	ANIA_02122	Putative Zn(II)2Cys6 transcription factor (Eurofung)	0.00393645	decreased coverage	\N
Aspergillus nidulans FGSC A4	227321	BN001307	ANIA_02167	HET-C domain protein HetC (AFU_orthologue; AFUA_2G15840)	0.00183003	decreased coverage	\N
Aspergillus nidulans FGSC A4	227321	BN001307	ANIA_02171	conserved hypothetical protein	0.000492729	decreased coverage	\N
Aspergillus nidulans FGSC A4	227321	BN001307	ANIA_02173	calcium-dependent mitochondrial carrier protein, putative (Eurofung)	0.00497794	decreased coverage	\N
Aspergillus nidulans FGSC A4	227321	BN001307	ANIA_02220	conserved hypothetical protein	3.53378e-05	decreased coverage	\N
Aspergillus nidulans FGSC A4	227321	BN001307	ANIA_02296	DNA damage and replication checkpoint protein Rfx1, putative (AFU_orthologue; AFUA_5G06120)	0.00552688	decreased coverage	\N
Aspergillus nidulans FGSC A4	227321	BN001307	ANIA_02303	GPI mannosyltransferase 4 (EC 2.4.1.-)(GPI mannosyltransferase IV)(GPI-MT-IV) [Source:UniProtKB/Swiss-Prot;Acc:Q5BAX7]	0.00235199	decreased coverage	\N
Aspergillus nidulans FGSC A4	227321	BN001307	ANIA_02311	phosphomevalonate kinase (AFU_orthologue; AFUA_5G10680)	8.9901e-09	decreased coverage	\N
Aspergillus nidulans FGSC A4	227321	BN001307	ANIA_02502	hypothetical protein	3.05516e-07	decreased coverage	\N
Aspergillus nidulans FGSC A4	227321	BN001307	ANIA_02520	Pheromone receptor PREB [Source:UniProtKB/TrEMBL;Acc:Q7SI72]	1.65068e-05	decreased coverage	\N
Aspergillus nidulans FGSC A4	227321	BN001307	ANIA_02573	conserved hypothetical protein	1.09595e-05	decreased coverage	\N
Aspergillus nidulans FGSC A4	227321	BN001307	ANIA_02590	conserved hypothetical protein	0.000954672	decreased coverage	\N
Aspergillus nidulans FGSC A4	227321	BN001307	ANIA_02610	cytochrome P450, putative (Eurofung)	2.44519e-07	decreased coverage	\N
Aspergillus nidulans FGSC A4	227321	BN001306	ANIA_02657	conserved hypothetical protein	2.5246e-06	decreased coverage	\N
Aspergillus nidulans FGSC A4	227321	BN001306	ANIA_02692	conserved hypothetical protein	0.000190542	decreased coverage	\N
Aspergillus nidulans FGSC A4	227321	BN001306	ANIA_02744	conserved hypothetical protein	0.00580281	decreased coverage	\N
Aspergillus nidulans FGSC A4	227321	BN001306	ANIA_02755	Mating type alpha box proteinMating-type protein MAT-1Putative uncharacterized protein ;; [Source:UniProtKB/TrEMBL;Acc:Q7Z896]	3.14226e-06	decreased coverage	\N
Aspergillus nidulans FGSC A4	227321	BN001306	ANIA_02795	conserved hypothetical protein	1.09355e-05	decreased coverage	\N
Aspergillus nidulans FGSC A4	227321	BN001306	ANIA_02819	conserved hypothetical protein	1.09067e-05	decreased coverage	\N
Aspergillus nidulans FGSC A4	227321	BN001306	ANIA_02838	conserved hypothetical protein	0.002534	decreased coverage	\N
Aspergillus nidulans FGSC A4	227321	BN001306	ANIA_02899	hypothetical protein	0.00343952	decreased coverage	\N
Aspergillus nidulans FGSC A4	227321	BN001306	ANIA_02950	hypothetical protein	9.6838e-08	decreased coverage	\N
Aspergillus nidulans FGSC A4	227321	BN001306	ANIA_02984	Putative transcription factor RlmAPutative uncharacterized protein ; [Source:UniProtKB/TrEMBL;Acc:Q76C71]	0.00020733	decreased coverage	\N
Aspergillus nidulans FGSC A4	227321	BN001306	ANIA_03097	conserved hypothetical protein	0.00191099	decreased coverage	\N
Aspergillus nidulans FGSC A4	227321	BN001306	ANIA_03110	serine/threonine protein kinase, putative (AFU_orthologue; AFUA_3G12670)	0.00206737	decreased coverage	\N
Aspergillus nidulans FGSC A4	227321	BN001306	ANIA_03130	conserved proline-rich protein (AFU_orthologue; AFUA_3G12990)	2.71187e-05	decreased coverage	\N
Aspergillus nidulans FGSC A4	227321	BN001306	ANIA_03137	conserved hypothetical protein	0.000478181	decreased coverage	\N
Aspergillus nidulans FGSC A4	227321	BN001306	ANIA_03145	conserved hypothetical protein	0.000166823	decreased coverage	\N
Aspergillus nidulans FGSC A4	227321	BN001306	ANIA_03415	ADP-ribosylglycohydrolase family protein (AFU_orthologue; AFUA_8G01570)	0.00015397	decreased coverage	\N
Aspergillus nidulans FGSC A4	227321	BN001302	ANIA_03490	conserved hypothetical protein	0.00117781	decreased coverage	\N
Aspergillus nidulans FGSC A4	227321	BN001302	ANIA_03524	NAD binding Rossmann fold oxidoreductase, putative (AFU_orthologue; AFUA_8G04870)	0.00618611	decreased coverage	\N
Aspergillus nidulans FGSC A4	227321	BN001302	ANIA_03544	hypothetical protein	9.86656e-06	decreased coverage	\N
Aspergillus nidulans FGSC A4	227321	BN001302	ANIA_03554	conserved hypothetical protein	0.00141072	decreased coverage	\N
Aspergillus nidulans FGSC A4	227321	BN001302	ANIA_03565	metallo-beta-lactamase domain protein, putative (AFU_orthologue; AFUA_3G00280)	3.15394e-06	decreased coverage	\N
Aspergillus nidulans FGSC A4	227321	BN001302	ANIA_03575	conserved hypothetical protein	4.17881e-11	decreased coverage	\N
Aspergillus nidulans FGSC A4	227321	BN001302	ANIA_03627	conserved hypothetical protein	1.58129e-05	decreased coverage	\N
Aspergillus nidulans FGSC A4	227321	BN001302	ANIA_03630	conserved hypothetical protein	6.13226e-08	decreased coverage	\N
Aspergillus nidulans FGSC A4	227321	BN001302	ANIA_03675	CPCA [Source:UniProtKB/TrEMBL;Acc:Q96V78]	0.00322234	decreased coverage	\N
Aspergillus nidulans FGSC A4	227321	BN001302	ANIA_03713	conserved hypothetical protein	0.00536056	decreased coverage	\N
Aspergillus nidulans FGSC A4	227321	BN001302	ANIA_03780	rhamnosidase B, putative (AFU_orthologue; AFUA_7G05040)	0.00577514	decreased coverage	\N
Aspergillus nidulans FGSC A4	227321	BN001302	ANIA_03781	sodium/phosphate symporter, putative (AFU_orthologue; AFUA_7G06350)	0.000997443	decreased coverage	\N
Aspergillus nidulans FGSC A4	227321	BN001302	ANIA_03795	G1/S-specific cyclin Cln1, putative (AFU_orthologue; AFUA_2G03920)	2.80939e-05	decreased coverage	\N
Aspergillus nidulans FGSC A4	227321	BN001302	ANIA_03796	hypothetical protein	8.01295e-06	decreased coverage	\N
Aspergillus nidulans FGSC A4	227321	BN001302	ANIA_03798	heme/steroid binding protein, putative (AFU_orthologue; AFUA_2G03880)	0.00146693	decreased coverage	\N
Aspergillus nidulans FGSC A4	227321	BN001302	ANIA_03805	carboxyphosphonoenolpyruvate phosphonomutase, putative (AFU_orthologue; AFUA_2G03820)	0.00106331	decreased coverage	\N
Aspergillus nidulans FGSC A4	227321	BN001302	ANIA_03821	Golgi to endosome transport protein (Ent3), putative (AFU_orthologue; AFUA_2G03650)	0.00560775	decreased coverage	\N
Aspergillus nidulans FGSC A4	227321	BN001302	ANIA_03939	SCF ubiquitin ligase subunit CulC, putative (AFU_orthologue; AFUA_6G08220)	0.00875329	decreased coverage	\N
Aspergillus nidulans FGSC A4	227321	BN001302	ANIA_03976	isoflavone reductase family protein (AFU_orthologue; AFUA_2G05290)	0.00351276	decreased coverage	\N
Aspergillus nidulans FGSC A4	227321	BN001302	ANIA_03981	conserved hypothetical protein	0.00679138	decreased coverage	\N
Aspergillus nidulans FGSC A4	227321	BN001302	ANIA_04055	acid phosphatase PHOa (AFU_orthologue; AFUA_1G03570)	0.00237417	decreased coverage	\N
Aspergillus nidulans FGSC A4	227321	BN001302	ANIA_04137	conserved hypothetical protein	0.00103385	decreased coverage	\N
Aspergillus nidulans FGSC A4	227321	BN001302	ANIA_04172	conserved hypothetical protein	5.69174e-07	decreased coverage	\N
Aspergillus nidulans FGSC A4	227321	BN001302	ANIA_04246	hypothetical protein	1.42535e-05	decreased coverage	\N
Aspergillus nidulans FGSC A4	227321	BN001303	ANIA_04297	NADH-ubiquinone oxidoreductase subunit B, putative (AFU_orthologue; AFUA_4G05860)	3.00852e-05	decreased coverage	\N
Aspergillus nidulans FGSC A4	227321	BN001303	ANIA_04314	conserved hypothetical protein	0.00374749	decreased coverage	\N
Aspergillus nidulans FGSC A4	227321	BN001303	ANIA_04324	putative b-zip transcription factor (Eurofung)	0.000504709	decreased coverage	\N
Aspergillus nidulans FGSC A4	227321	BN001303	ANIA_04329	progesterone binding protein, putative (AFU_orthologue; AFUA_4G06240)	0.00163821	decreased coverage	\N
Aspergillus nidulans FGSC A4	227321	BN001303	ANIA_04414	diphosphomevalonate decarboxylase (AFU_orthologue; AFUA_4G07130)	0.00225214	decreased coverage	\N
Aspergillus nidulans FGSC A4	227321	BN001303	ANIA_04423	conserved hypothetical protein	1.73391e-05	decreased coverage	\N
Aspergillus nidulans FGSC A4	227321	BN001303	ANIA_04487	conserved hypothetical protein	1.62154e-05	decreased coverage	\N
Aspergillus nidulans FGSC A4	227321	BN001303	ANIA_04489	Putative Zn(II)2Cys6 transcription factor (Eurofung)	0.000654882	decreased coverage	\N
Aspergillus nidulans FGSC A4	227321	BN001303	ANIA_04515	putative transglycosidase, GH16 family (Eurofung)	3.84453e-05	decreased coverage	\N
Aspergillus nidulans FGSC A4	227321	BN001303	ANIA_04542	C2H2 finger domain protein, putative (AFU_orthologue; AFUA_2G02730)	0.000118492	decreased coverage	\N
Aspergillus nidulans FGSC A4	227321	BN001303	ANIA_04546	KH domain RNA-binding protein (AFU_orthologue; AFUA_2G02780)	4.59967e-06	decreased coverage	\N
Aspergillus nidulans FGSC A4	227321	BN001303	ANIA_04695	Woronin body major protein [Source:UniProtKB/Swiss-Prot;Acc:Q9P8K9]	0.000213252	decreased coverage	\N
Aspergillus nidulans FGSC A4	227321	BN001303	ANIA_04744	Putative Zn(II)2Cys6 transcription factor (Eurofung)	0.000672297	decreased coverage	\N
Aspergillus nidulans FGSC A4	227321	BN001303	ANIA_04809	Glutaminase A [Source:UniProtKB/TrEMBL;Acc:Q9UVX8]	3.77599e-06	decreased coverage	\N
Aspergillus nidulans FGSC A4	227321	BN001303	ANIA_04839	conserved hypothetical protein	8.37287e-07	decreased coverage	\N
Aspergillus nidulans FGSC A4	227321	BN001303	ANIA_04891	Histone chaperone asf1 (Anti-silencing function protein 1) [Source:UniProtKB/Swiss-Prot;Acc:Q5B3I9]	0.000745224	decreased coverage	\N
Aspergillus nidulans FGSC A4	227321	BN001303	ANIA_04893	eukaryotic translation initiation factor eIF-2C4, putative (AFU_orthologue; AFUA_3G11010)	5.33189e-11	decreased coverage	\N
Aspergillus nidulans FGSC A4	227321	BN001303	ANIA_04894	transcriptional activator spt7 (AFU_orthologue; AFUA_3G11000)	0.000259105	decreased coverage	\N
Aspergillus nidulans FGSC A4	227321	BN001303	ANIA_04923	hydroxymethylglutaryl-CoA synthase, expressed (Eurofung)	0.000140052	decreased coverage	\N
Aspergillus nidulans FGSC A4	227321	BN001303	ANIA_04963	cell division control protein (Cdc15), putative (AFU_orthologue; AFUA_3G10250)	0.00898549	decreased coverage	\N
Aspergillus nidulans FGSC A4	227321	BN001303	ANIA_04981	cyclin, putative (AFU_orthologue; AFUA_3G10070)	4.8024e-07	decreased coverage	\N
Aspergillus nidulans FGSC A4	227321	BN001303	ANIA_05049	CDF divalent metal cation transporter (Eurofung)	0.000185539	decreased coverage	\N
Aspergillus nidulans FGSC A4	227321	BN001303	ANIA_05059	conserved hypothetical protein	0.000277675	decreased coverage	\N
Aspergillus nidulans FGSC A4	227321	BN001303	ANIA_05069	integral membrane protein, putative (AFU_orthologue; AFUA_5G02860)	5.79173e-10	decreased coverage	\N
Aspergillus nidulans FGSC A4	227321	BN001303	ANIA_05090	hypothetical protein	2.00346e-05	decreased coverage	\N
Aspergillus nidulans FGSC A4	227321	BN001305	ANIA_05148	Fe superoxide dismutase, putative (AFU_orthologue; AFUA_6G07210)	0.000120882	decreased coverage	\N
Aspergillus nidulans FGSC A4	227321	BN001305	ANIA_05164	30S ribosomal subunit S4, putative (AFU_orthologue; AFUA_1G06980)	0.00412047	decreased coverage	\N
Aspergillus nidulans FGSC A4	227321	BN001305	ANIA_05186	ubiquitin C-terminal hydrolase, putative (AFU_orthologue; AFUA_1G07160)	0.000787837	decreased coverage	\N
Aspergillus nidulans FGSC A4	227321	BN001305	ANIA_05237	conserved hypothetical protein	0.00419082	decreased coverage	\N
Aspergillus nidulans FGSC A4	227321	BN001305	ANIA_05241	conserved hypothetical protein	0.000534718	decreased coverage	\N
Aspergillus nidulans FGSC A4	227321	BN001305	ANIA_05245	hypothetical protein	2.17339e-14	unclonable	\N
Aspergillus nidulans FGSC A4	227321	BN001305	ANIA_05250	conserved hypothetical protein	9.70536e-05	decreased coverage	\N
Aspergillus nidulans FGSC A4	227321	BN001305	ANIA_05311	tyrosinase, putative (AFU_orthologue; AFUA_3G01070)	0.00354279	decreased coverage	\N
Aspergillus nidulans FGSC A4	227321	BN001305	ANIA_05345	conserved hypothetical protein	0.00681608	decreased coverage	\N
Aspergillus nidulans FGSC A4	227321	BN001305	ANIA_05351	ubiquitin conjugating enzyme, putative (AFU_orthologue; AFUA_6G14130)	0.000233397	decreased coverage	\N
Aspergillus nidulans FGSC A4	227321	BN001305	ANIA_05374	conserved hypothetical protein	0.000483904	decreased coverage	\N
Aspergillus nidulans FGSC A4	227321	BN001305	ANIA_05427	chromate ion transporter (Eurofung)	0.00300888	decreased coverage	\N
Aspergillus nidulans FGSC A4	227321	BN001305	ANIA_05430	hypothetical protein	2.87707e-05	decreased coverage	\N
Aspergillus nidulans FGSC A4	227321	BN001305	ANIA_05432	conserved hypothetical protein	0.000576174	decreased coverage	\N
Aspergillus nidulans FGSC A4	227321	BN001305	ANIA_05453	arrestin (or S-antigen), N-terminal domain protein (AFU_orthologue; AFUA_6G13380)	0.000665406	decreased coverage	\N
Aspergillus nidulans FGSC A4	227321	BN001305	ANIA_05455	U3 small nucleolar RNA-associated protein 10 [Source:UniProtKB/Swiss-Prot;Acc:Q5B1X5]	0.008098	decreased coverage	\N
Aspergillus nidulans FGSC A4	227321	BN001305	ANIA_05466	conserved hypothetical protein	0.000886581	decreased coverage	\N
Aspergillus nidulans FGSC A4	227321	BN001305	ANIA_05474	conserved hypothetical protein	3.23968e-09	decreased coverage	\N
Aspergillus nidulans FGSC A4	227321	BN001305	ANIA_05493	nucleoside transporter (Eurofung)	0.00128768	decreased coverage	\N
Aspergillus nidulans FGSC A4	227321	BN001305	ANIA_05504	HET domain protein (AFU_orthologue; AFUA_8G01020)	0.00377896	decreased coverage	\N
Aspergillus nidulans FGSC A4	227321	BN001305	ANIA_05535	cell cycle control protein (Cwf19), putative (AFU_orthologue; AFUA_4G11830)	1.04315e-06	decreased coverage	\N
Aspergillus nidulans FGSC A4	227321	BN001305	ANIA_05543	conserved hypothetical protein	0.00417215	decreased coverage	\N
Aspergillus nidulans FGSC A4	227321	BN001305	ANIA_05605	conserved hypothetical protein	0.000358689	decreased coverage	\N
Aspergillus nidulans FGSC A4	227321	BN001305	ANIA_05619	ADAM family of metalloprotease ADM-B (AFU_orthologue; AFUA_4G11150)	0.00103668	decreased coverage	\N
Aspergillus nidulans FGSC A4	227321	BN001305	ANIA_05752	Mediator of RNA polymerase II transcription subunit 18 (Mediator complex subunit 18) [Source:UniProtKB/Swiss-Prot;Acc:Q5B128]	0.00400845	decreased coverage	\N
Aspergillus nidulans FGSC A4	227321	BN001301	ANIA_05886	alpha isopropylmalate isomerase (Eurofung)	0.00198619	decreased coverage	\N
Aspergillus nidulans FGSC A4	227321	BN001301	ANIA_05900	AMFR protein, putative (AFU_orthologue; AFUA_2G11100)	0.00127544	decreased coverage	\N
Aspergillus nidulans FGSC A4	227321	BN001301	ANIA_05944	conserved hypothetical protein	8.73432e-05	decreased coverage	\N
Aspergillus nidulans FGSC A4	227321	BN001301	ANIA_06038	hypothetical protein	0.00689104	decreased coverage	\N
Aspergillus nidulans FGSC A4	227321	BN001301	ANIA_06103	conserved hypothetical protein	9.66613e-07	decreased coverage	\N
Aspergillus nidulans FGSC A4	227321	BN001301	ANIA_06111	exosome complex endonuclease 2/ribosomal RNA processing protein, putative (AFU_orthologue; AFUA_2G08860)	7.32301e-07	decreased coverage	\N
Aspergillus nidulans FGSC A4	227321	BN001301	ANIA_06231	Bifunctional tryptophan synthase TRPB (EC 4.2.1.20) [Source:UniProtKB/TrEMBL;Acc:Q9P4D5]	0.000243667	decreased coverage	\N
Aspergillus nidulans FGSC A4	227321	BN001301	ANIA_06232	Vacuolar ATP synthase subunit B Fragment [Source:UniProtKB/TrEMBL;Acc:Q9P495]	0.000329525	decreased coverage	\N
Aspergillus nidulans FGSC A4	227321	BN001301	ANIA_06271	conserved hypothetical protein	0.000214789	decreased coverage	\N
Aspergillus nidulans FGSC A4	227321	BN001301	ANIA_06285	hypothetical protein	0.00230177	decreased coverage	\N
Aspergillus nidulans FGSC A4	227321	BN001301	ANIA_06305	CAMP-dependent protein kinase PKAC catalytic subunitPutative uncharacterized protein ; [Source:UniProtKB/TrEMBL;Acc:Q9P472]	8.08086e-06	decreased coverage	\N
Aspergillus nidulans FGSC A4	227321	BN001301	ANIA_06355	hypothetical protein	2.34438e-05	decreased coverage	\N
Aspergillus nidulans FGSC A4	227321	BN001301	ANIA_06429	conserved hypothetical protein	3.14614e-07	decreased coverage	\N
Aspergillus nidulans FGSC A4	227321	BN001301	ANIA_06594	Cell division cycle protein 123 [Source:UniProtKB/Swiss-Prot;Acc:Q5AYN6]	3.74717e-05	decreased coverage	\N
Aspergillus nidulans FGSC A4	227321	BN001301	ANIA_06601	CLPTM1 domain protein (AFU_orthologue; AFUA_6G04110)	0.000178249	decreased coverage	\N
Aspergillus nidulans FGSC A4	227321	BN001301	ANIA_06668	conserved hypothetical protein	1.06113e-07	decreased coverage	\N
Aspergillus nidulans FGSC A4	227321	BN001301	ANIA_06747	Putative transcription factor with C2H2 and Zn(2)-Cys(6) DNA binding domain (Eurofung)	0.00110078	decreased coverage	\N
Aspergillus nidulans FGSC A4	227321	BN001301	ANIA_06777	conserved hypothetical protein	5.88303e-05	decreased coverage	\N
Aspergillus nidulans FGSC A4	227321	BN001301	ANIA_06861	DUF1275 domain protein (AFU_orthologue; AFUA_5G13060)	1.08871e-08	decreased coverage	\N
Aspergillus nidulans FGSC A4	227321	BN001304	ANIA_07078	conserved hypothetical protein	0.00576497	decreased coverage	\N
Aspergillus nidulans FGSC A4	227321	BN001304	ANIA_07095	conserved hypothetical protein	0.000100685	decreased coverage	\N
Aspergillus nidulans FGSC A4	227321	BN001304	ANIA_07173	Vacuolar Ca(2+)/H(+) exchanger, putative (Eurofung)	0.000380184	decreased coverage	\N
Aspergillus nidulans FGSC A4	227321	BN001304	ANIA_07256	putative microbody (peroxisome) proliferation protein peroxin 11C (Eurofung)	0.00620411	decreased coverage	\N
Aspergillus nidulans FGSC A4	227321	BN001304	ANIA_07276	conserved hypothetical protein	2.59476e-08	decreased coverage	\N
Aspergillus nidulans FGSC A4	227321	BN001304	ANIA_07301	Dolichyl pyrophosphate Glc1Man9GlcNAc2 alpha-1,3-glucosyltransferase (EC 2.4.1.-)(Dolichyl-P-Glc:Glc1Man9GlcNAc2-PP-dolichyl glucosyltransferase)(Asparagine-linked glycosylation protein 8) [Source:UniProtKB/Swiss-Prot;Acc:Q5AWM9]	0.00231216	decreased coverage	\N
Aspergillus nidulans FGSC A4	227321	BN001304	ANIA_07608	conserved hypothetical protein	0.000148334	decreased coverage	\N
Aspergillus nidulans FGSC A4	227321	BN001304	ANIA_07612	hypothetical protein	0.000222985	decreased coverage	\N
Aspergillus nidulans FGSC A4	227321	BN001304	ANIA_07649	Mitochondrial import inner membrane translocase subunit tim9 [Source:UniProtKB/Swiss-Prot;Acc:Q9Y8A7]	5.92703e-13	decreased coverage	\N
Aspergillus nidulans FGSC A4	227321	BN001304	ANIA_07650	conserved hypothetical protein similar to Rho GTPase activating proteins (Eurofung)	0.00375231	decreased coverage	\N
Aspergillus nidulans FGSC A4	227321	BN001304	ANIA_07756	conserved hypothetical protein	0.00325762	decreased coverage	\N
Aspergillus nidulans FGSC A4	227321	BN001304	ANIA_07807	Putative sterigmatocystin biosynthesis protein stcT [Source:UniProtKB/Swiss-Prot;Acc:Q00717]	0.000242501	decreased coverage	\N
Aspergillus nidulans FGSC A4	227321	BN001304	ANIA_07829	hypothetical protein	0.00406873	decreased coverage	\N
Aspergillus nidulans FGSC A4	227321	BN001302	ANIA_07950	Beta-1,3-endoglucanasePutative uncharacterized protein ; [Source:UniProtKB/TrEMBL;Acc:Q5AUT0]	0.000158341	decreased coverage	\N
Aspergillus nidulans FGSC A4	227321	BN001302	ANIA_07964	conserved hypothetical protein	0.000279907	decreased coverage	\N
Aspergillus nidulans FGSC A4	227321	BN001302	ANIA_07975	conserved hypothetical protein	0.00518345	decreased coverage	\N
Aspergillus nidulans FGSC A4	227321	BN001302	ANIA_08037	GPI anchored protein, putative (AFU_orthologue; AFUA_5G01920)	7.25769e-05	decreased coverage	\N
Aspergillus nidulans FGSC A4	227321	BN001302	ANIA_08088	C6 transcription factor, putative (AFU_orthologue; AFUA_7G00410)	1.00415e-08	decreased coverage	\N
Aspergillus nidulans FGSC A4	227321	BN001302	ANIA_08095	MFS toxin efflux pump (AflT), putative (AFU_orthologue; AFUA_1G12620)	0.00148493	decreased coverage	\N
Aspergillus nidulans FGSC A4	227321	BN001302	ANIA_08168	Nitrogen metabolite repression regulator NmrA [Source:UniProtKB/TrEMBL;Acc:O59919]	0.0063095	decreased coverage	\N
Aspergillus nidulans FGSC A4	227321	BN001302	ANIA_08229	mitochondrial export translocase Oxa1, putative (AFU_orthologue; AFUA_5G03640)	0.00429676	decreased coverage	\N
Aspergillus nidulans FGSC A4	227321	BN001302	ANIA_08248	mitochondrial fusion protein (Ugo1), putative (AFU_orthologue; AFUA_5G03910)	3.11483e-05	decreased coverage	\N
Aspergillus nidulans FGSC A4	227321	BN001302	ANIA_08283	14-alpha sterol demethylase Fragment [Source:UniProtKB/TrEMBL;Acc:Q96W77]	0.00402354	decreased coverage	\N
Aspergillus nidulans FGSC A4	227321	BN001305	ANIA_08382	hypothetical protein	4.80691e-05	decreased coverage	\N
Aspergillus nidulans FGSC A4	227321	BN001305	ANIA_08393	conserved hypothetical protein	0.00148588	decreased coverage	\N
Aspergillus nidulans FGSC A4	227321	BN001305	ANIA_08438	cytochrome P450, putative (Eurofung)	0.000836245	decreased coverage	\N
Aspergillus nidulans FGSC A4	227321	BN001305	ANIA_08507	conserved hypothetical protein	2.72571e-07	decreased coverage	\N
Aspergillus nidulans FGSC A4	227321	BN001303	ANIA_08638	HHE domain protein (AFU_orthologue; AFUA_4G00730)	0.000349477	decreased coverage	\N
Aspergillus nidulans FGSC A4	227321	BN001303	ANIA_08659	amino acid transporter (Eurofung)	2.86904e-05	decreased coverage	\N
Aspergillus nidulans FGSC A4	227321	BN001303	ANIA_08666	Putative Zn(II)2Cys6 transcription factor (Eurofung)	0.00267711	decreased coverage	\N
Aspergillus nidulans FGSC A4	227321	BN001303	ANIA_08723	hypothetical protein	4.52844e-06	decreased coverage	\N
Aspergillus nidulans FGSC A4	227321	BN001303	ANIA_08766	Assembly factor cbp4 (Cytochrome b mRNA-processing protein 4) [Source:UniProtKB/Swiss-Prot;Acc:Q5ASG4]	0.000379851	decreased coverage	\N
Aspergillus nidulans FGSC A4	227321	BN001303	ANIA_08802	hypothetical protein	0.00314193	decreased coverage	\N
Aspergillus nidulans FGSC A4	227321	BN001303	ANIA_08818	conserved hypothetical protein	0.00113375	decreased coverage	\N
Aspergillus nidulans FGSC A4	227321	BN001303	ANIA_08842	Calcium channel MID1Putative uncharacterized protein ; [Source:UniProtKB/TrEMBL;Acc:Q8J0B5]	0.00467051	decreased coverage	\N
Aspergillus nidulans FGSC A4	227321	BN001307	ANIA_08976	conserved hypothetical protein	7.10919e-05	decreased coverage	\N
Aspergillus nidulans FGSC A4	227321	BN001307	ANIA_08990	GABA transporter, putative (Eurofung)	0.00206587	decreased coverage	\N
Aspergillus nidulans FGSC A4	227321	BN001307	ANIA_08991	conserved hypothetical protein	2.5122e-05	decreased coverage	\N
Aspergillus nidulans FGSC A4	227321	BN001306	ANIA_09098	conserved hypothetical protein	0.000689737	decreased coverage	\N
Aspergillus nidulans FGSC A4	227321	BN001306	ANIA_09147	Putative Zn(II)2Cys6 transcription factor (Eurofung)	0.0074212	decreased coverage	\N
Aspergillus nidulans FGSC A4	227321	BN001306	ANIA_09165	conserved hypothetical protein	0.000731915	decreased coverage	\N
Aspergillus nidulans FGSC A4	227321	BN001308	ANIA_09294	hypothetical protein	0.00338794	decreased coverage	\N
Aspergillus nidulans FGSC A4	227321	BN001308	ANIA_09321	hypothetical protein	0.00200533	decreased coverage	\N
Aspergillus nidulans FGSC A4	227321	BN001308	ANIA_09366	conserved hypothetical protein	0.00133141	decreased coverage	\N
Aspergillus nidulans FGSC A4	227321	BN001301	ANIA_09451	OefBPutative uncharacterized protein ; [Source:UniProtKB/TrEMBL;Acc:Q5ICC4]	0.00109758	decreased coverage	\N
Aspergillus nidulans FGSC A4	227321	BN001305	ANIA_09477	conserved hypothetical protein	0.000477869	decreased coverage	\N
Aspergillus nidulans FGSC A4	227321	BN001306	ANIA_09524	endo-1,4-beta-glucanase, putative (AFU_orthologue; AFUA_3G03870)	3.93841e-08	decreased coverage	\N
Aspergillus nidulans FGSC A4	227321	BN001307	ANIA_09538	C2H2 finger domain protein, putative (AFU_orthologue; AFUA_2G16230)	2.21271e-06	decreased coverage	\N
Aspergillus nidulans FGSC A4	227321	BN001308	ANIA_10018	mitochondrial carrier protein (Pet8), putative (AFU_orthologue; AFUA_5G11850)	2.77983e-05	decreased coverage	\N
Aspergillus nidulans FGSC A4	227321	BN001308	ANIA_10068	C2H2 finger domain protein, putative (AFU_orthologue; AFUA_1G02010)	0.00193901	decreased coverage	\N
Aspergillus nidulans FGSC A4	227321	BN001308	ANIA_10090	conserved hypothetical protein	0.00130663	decreased coverage	\N
Aspergillus nidulans FGSC A4	227321	BN001308	ANIA_10107	conserved hypothetical protein	0.000404535	decreased coverage	\N
Aspergillus nidulans FGSC A4	227321	BN001307	ANIA_10215	peroxisomal targeting signal (PTS1) receptor protein peroxin 5 (Eurofung)	6.12411e-06	decreased coverage	\N
Aspergillus nidulans FGSC A4	227321	BN001307	ANIA_10253	sister chromatid cohesion protein Ctf8, putative (AFU_orthologue; AFUA_4G10630)	0.0015771	decreased coverage	\N
Aspergillus nidulans FGSC A4	227321	BN001306	ANIA_10344	CobW domain protein (AFU_orthologue; AFUA_8G02620)	5.58186e-06	decreased coverage	\N
Aspergillus nidulans FGSC A4	227321	BN001306	ANIA_10355	GTPase activating protein (Gyp3), putative (AFU_orthologue; AFUA_3G12870)	0.000127228	decreased coverage	\N
Aspergillus nidulans FGSC A4	227321	BN001302	ANIA_10425	hypothetical protein	3.79577e-13	unclonable	\N
Aspergillus nidulans FGSC A4	227321	BN001302	ANIA_10440	NADH-ubiquinone oxidoreductase 39 kDa subunit, putative (AFU_orthologue; AFUA_6G12790)	0.00432444	decreased coverage	\N
Aspergillus nidulans FGSC A4	227321	BN001302	ANIA_10495	coenzyme A transferase, putative (AFU_orthologue; AFUA_1G04120)	0.00529511	decreased coverage	\N
Aspergillus nidulans FGSC A4	227321	BN001302	ANIA_10516	SCF E3 ubiquitin ligase complex F-box protein grrA (SCF substrate adapter protein grrA)(F-box and leucine-rich repeat protein grrA)(F-box/LRR-repeat protein grrA) [Source:UniProtKB/Swiss-Prot;Acc:Q15I80]	0.000155754	decreased coverage	\N
Aspergillus nidulans FGSC A4	227321	BN001303	ANIA_10595	Septin [Source:UniProtKB/TrEMBL;Acc:Q9C1M0]	0.000111129	decreased coverage	\N
Aspergillus nidulans FGSC A4	227321	BN001303	ANIA_10601	LPS glycosyltransferase, putative (AFU_orthologue; AFUA_8G00650)	0.00351469	decreased coverage	\N
Aspergillus nidulans FGSC A4	227321	BN001305	ANIA_10649	conserved hypothetical protein	0.000556846	unclonable	\N
Aspergillus nidulans FGSC A4	227321	BN001305	ANIA_10657	conserved hypothetical protein	0.00945329	decreased coverage	\N
Aspergillus nidulans FGSC A4	227321	BN001301	ANIA_10754	nuclear protein export protein Yrb2, putative (AFU_orthologue; AFUA_2G10810)	0.000820278	decreased coverage	\N
Aspergillus nidulans FGSC A4	227321	BN001301	ANIA_10788	Vacuolar protein-sorting protein bro1 (BRO domain-containing protein 1) [Source:UniProtKB/Swiss-Prot;Acc:Q6XPR4]	0.00671573	decreased coverage	\N
Aspergillus nidulans FGSC A4	227321	BN001301	ANIA_10837	amidophosphoribosyltransferase (Eurofung)	0.00672767	decreased coverage	\N
Aspergillus nidulans FGSC A4	227321	BN001304	ANIA_10974	conserved hypothetical protein	0.00688168	decreased coverage	\N
Aspergillus nidulans FGSC A4	227321	BN001302	ANIA_11045	actin interacting protein 2 (AFU_orthologue; AFUA_5G02230)	7.45867e-06	decreased coverage	\N
Aspergillus nidulans FGSC A4	227321	BN001303	ANIA_11097	conserved hypothetical protein	0.00013392	decreased coverage	\N
Aspergillus nidulans FGSC A4	227321	BN001308	ANIA_11203	conserved hypothetical protein	3.16478e-05	decreased coverage	\N
Aspergillus nidulans FGSC A4	227321	BN001302	ANIA_11225	conserved hypothetical protein	0.0015214	decreased coverage	\N
Aspergillus nidulans FGSC A4	227321	BN001308	ANIA_11280	hypothetical protein	0.00207576	decreased coverage	\N
Aspergillus nidulans FGSC A4	227321	BN001308	ANIA_11292	hypothetical protein	0.00982726	decreased coverage	\N
Aspergillus nidulans FGSC A4	227321	BN001307	ANIA_11315	hypothetical protein	0.00610608	decreased coverage	\N
Aspergillus nidulans FGSC A4	227321	BN001305	ANIA_11483	hypothetical protein	0.00092524	decreased coverage	\N
Aspergillus nidulans FGSC A4	227321	BN001301	ANIA_11667	hypothetical protein	0.000210131	decreased coverage	\N
Atopobium parvulum DSM 20469	521095	NC_013203	Apar_0016	GTP-binding protein TypA	1.19023e-07	unclonable	COG1217
Atopobium parvulum DSM 20469	521095	NC_013203	Apar_0017	protein of unknown function UPF0126	4.29816e-09	unclonable	COG2860
Atopobium parvulum DSM 20469	521095	NC_013203	Apar_0018	hypothetical protein	4.21814e-08	unclonable	\N
Atopobium parvulum DSM 20469	521095	NC_013203	Apar_0119	HAD-superfamily subfamily IB hydrolase, TIGR01490	4.00181e-09	unclonable	COG0560
Atopobium parvulum DSM 20469	521095	NC_013203	Apar_0120	transcriptional regulator, BadM/Rrf2 family	2.13431e-09	unclonable	COG1959
Atopobium parvulum DSM 20469	521095	NC_013203	Apar_0121	HhH-GPD family protein	7.56832e-09	unclonable	COG1194
Atopobium parvulum DSM 20469	521095	NC_013203	Apar_0122	Rubrerythrin	1.48271e-09	unclonable	COG1592
Atopobium parvulum DSM 20469	521095	NC_013203	Apar_0123	endonuclease III	2.15731e-09	unclonable	COG0177
Atopobium parvulum DSM 20469	521095	NC_013203	Apar_0240	peptidase	7.87577e-08	unclonable	COG0624
Atopobium parvulum DSM 20469	521095	NC_013203	Apar_0283	short-chain dehydrogenase/reductase SDR	1.06623e-07	decreased coverage	COG1028
Atopobium parvulum DSM 20469	521095	NC_013203	Apar_0284	2-keto-3-deoxygluconate permease	1.89316e-07	decreased coverage	\N
Atopobium parvulum DSM 20469	521095	NC_013203	Apar_0290	heavy metal translocating P-type ATPase	3.72175e-06	decreased coverage	COG2217
Atopobium parvulum DSM 20469	521095	NC_013203	Apar_0312	transcriptional regulator, TetR family	3.80117e-09	unclonable	COG1309
Atopobium parvulum DSM 20469	521095	NC_013203	Apar_0313	hypothetical protein	3.95913e-09	unclonable	\N
Atopobium parvulum DSM 20469	521095	NC_013203	Apar_0322	1-phosphofructokinase	0.000799963	decreased coverage	COG1105
Atopobium parvulum DSM 20469	521095	NC_013203	Apar_0402	FeS assembly ATPase SufC	7.98388e-06	decreased coverage	COG0396
Atopobium parvulum DSM 20469	521095	NC_013203	Apar_0403	histidyl-tRNA synthetase	7.68069e-07	decreased coverage	COG0124
Atopobium parvulum DSM 20469	521095	NC_013203	Apar_0433	peptidase S1 and S6 chymotrypsin/Hap	4.34978e-08	unclonable	COG0265
Atopobium parvulum DSM 20469	521095	NC_013203	Apar_0464	Protein-N(pi)-phosphohistidine--sugar phosphotransferase	2.7828e-07	decreased coverage	COG2893,COG3444
Atopobium parvulum DSM 20469	521095	NC_013203	Apar_0465	phosphotransferase system PTS sorbose-specific IIC subunit	6.77014e-09	unclonable	COG3715
Atopobium parvulum DSM 20469	521095	NC_013203	Apar_0489	cell division protein FtsZ	3.9115e-07	decreased coverage	COG0206
Atopobium parvulum DSM 20469	521095	NC_013203	Apar_0522	translation initiation factor IF-3	6.92532e-08	decreased coverage	COG0290
Atopobium parvulum DSM 20469	521095	NC_013203	Apar_0523	ribosomal protein L35	2.50837e-08	decreased coverage	COG0291
Atopobium parvulum DSM 20469	521095	NC_013203	Apar_0524	ribosomal protein L20	4.08752e-08	decreased coverage	COG0292
Atopobium parvulum DSM 20469	521095	NC_013203	Apar_0593	hypothetical protein	0.00835781	decreased coverage	\N
Atopobium parvulum DSM 20469	521095	NC_013203	Apar_0650	4Fe-4S ferredoxin, iron-sulfur binding protein	5.24122e-10	unclonable	COG1141
Atopobium parvulum DSM 20469	521095	NC_013203	Apar_0651	\N	7.68037e-10	unclonable	\N
Atopobium parvulum DSM 20469	521095	NC_013203	Apar_0679	ribosomal protein L27	2.46581e-06	decreased coverage	COG0211
Atopobium parvulum DSM 20469	521095	NC_013203	Apar_0686	iojap-like protein	2.89548e-09	unclonable	COG0799
Atopobium parvulum DSM 20469	521095	NC_013203	Apar_0687	DNA-directed DNA polymerase	3.44848e-08	unclonable	COG0389
Atopobium parvulum DSM 20469	521095	NC_013203	Apar_0688	ribosomal protein S16	2.24694e-09	unclonable	COG0228
Atopobium parvulum DSM 20469	521095	NC_013203	Apar_0697	deoxyguanosinetriphosphate triphosphohydrolase	1.3673e-08	unclonable	COG0232
Atopobium parvulum DSM 20469	521095	NC_013203	Apar_0698	ribosomal protein L19	1.27437e-09	unclonable	COG0335
Atopobium parvulum DSM 20469	521095	NC_013203	Apar_0699	Ribonuclease H	4.99736e-09	unclonable	COG0164
Atopobium parvulum DSM 20469	521095	NC_013203	Apar_0700	protein of unknown function UPF0102	2.02877e-09	unclonable	COG0792
Atopobium parvulum DSM 20469	521095	NC_013203	Apar_0705	ribosomal protein S2	4.21001e-09	unclonable	COG0052
Atopobium parvulum DSM 20469	521095	NC_013203	Apar_0749	CDP-alcohol phosphatidyltransferase	8.01084e-08	decreased coverage	COG0558
Atopobium parvulum DSM 20469	521095	NC_013203	Apar_0750	Serine-type D-Ala-D-Ala carboxypeptidase	1.67123e-08	unclonable	COG1686
Atopobium parvulum DSM 20469	521095	NC_013203	Apar_0777	RNA binding metal dependent phosphohydrolase	7.96077e-08	unclonable	COG1418
Atopobium parvulum DSM 20469	521095	NC_013203	Apar_0778	regulatory protein RecX	7.05154e-09	unclonable	COG2137
Atopobium parvulum DSM 20469	521095	NC_013203	Apar_0787	beta-lactamase domain protein	1.29126e-07	unclonable	COG0595
Atopobium parvulum DSM 20469	521095	NC_013203	Apar_0788	Polyribonucleotide nucleotidyltransferase	6.77019e-07	unclonable	COG1185
Atopobium parvulum DSM 20469	521095	NC_013203	Apar_0789	ribosomal protein S15	1.01038e-09	unclonable	COG0184
Atopobium parvulum DSM 20469	521095	NC_013203	Apar_0790	DNA repair protein RecO	5.58246e-09	unclonable	COG1381
Atopobium parvulum DSM 20469	521095	NC_013203	Apar_0832	protein of unknown function DUF150	1.30104e-09	unclonable	COG0779
Atopobium parvulum DSM 20469	521095	NC_013203	Apar_0833	leucyl-tRNA synthetase	1.49617e-06	unclonable	COG0495
Atopobium parvulum DSM 20469	521095	NC_013203	Apar_0863	ribosomal protein L28	6.49528e-09	unclonable	COG0227
Atopobium parvulum DSM 20469	521095	NC_013203	Apar_0864	thiamine pyrophosphokinase	1.34495e-07	unclonable	COG0637,COG1564
Atopobium parvulum DSM 20469	521095	NC_013203	Apar_0889	HAD-superfamily hydrolase, subfamily IA, variant 3	3.45367e-06	decreased coverage	COG0637
Atopobium parvulum DSM 20469	521095	NC_013203	Apar_0896	amidohydrolase-like protein	0.000474495	decreased coverage	COG0388
Atopobium parvulum DSM 20469	521095	NC_013203	Apar_0908	peroxiredoxin	1.79552e-09	unclonable	COG0450
Atopobium parvulum DSM 20469	521095	NC_013203	Apar_0953	peptidase T	2.7828e-07	decreased coverage	COG2195
Atopobium parvulum DSM 20469	521095	NC_013203	Apar_0954	peptidase C26	2.8221e-05	decreased coverage	COG2071
Atopobium parvulum DSM 20469	521095	NC_013203	Apar_0967	hypothetical protein	1.12946e-09	unclonable	\N
Atopobium parvulum DSM 20469	521095	NC_013203	Apar_0974	Phosphoenolpyruvate carboxylase	5.78394e-05	decreased coverage	COG2352
Atopobium parvulum DSM 20469	521095	NC_013203	Apar_1139	methionine aminopeptidase, type I	8.63177e-07	decreased coverage	COG0024
Atopobium parvulum DSM 20469	521095	NC_013203	Apar_1140	adenylate kinase	5.92914e-07	decreased coverage	COG0563
Atopobium parvulum DSM 20469	521095	NC_013203	Apar_1141	preprotein translocase, SecY subunit	4.40606e-06	decreased coverage	COG0201
Atopobium parvulum DSM 20469	521095	NC_013203	Apar_1142	ribosomal protein L15	4.49259e-07	decreased coverage	COG0200
Atopobium parvulum DSM 20469	521095	NC_013203	Apar_1143	ribosomal protein L30	2.5708e-07	decreased coverage	COG1841
Atopobium parvulum DSM 20469	521095	NC_013203	Apar_1144	ribosomal protein S5	7.88101e-07	decreased coverage	COG0098
Atopobium parvulum DSM 20469	521095	NC_013203	Apar_1145	ribosomal protein L18	5.49459e-07	decreased coverage	COG0256
Atopobium parvulum DSM 20469	521095	NC_013203	Apar_1146	ribosomal protein L6	1.04709e-06	decreased coverage	COG0097
Atopobium parvulum DSM 20469	521095	NC_013203	Apar_1147	ribosomal protein S8	6.86706e-07	decreased coverage	COG0096
Atopobium parvulum DSM 20469	521095	NC_013203	Apar_1161	ribosomal protein L3	2.66904e-09	unclonable	COG0087
Atopobium parvulum DSM 20469	521095	NC_013203	Apar_1162	protein tyrosine phosphatase	1.63981e-09	unclonable	COG0394
Atopobium parvulum DSM 20469	521095	NC_013203	Apar_1163	ribosomal protein S10	9.40072e-10	unclonable	COG0051
Atopobium parvulum DSM 20469	521095	NC_013203	Apar_1164	translation elongation factor G	3.82661e-07	unclonable	COG0480
Atopobium parvulum DSM 20469	521095	NC_013203	Apar_1165	ribosomal protein S7	2.69779e-09	unclonable	COG0049
Atopobium parvulum DSM 20469	521095	NC_013203	Apar_1166	ribosomal protein S12	1.85152e-09	unclonable	COG0048
Atopobium parvulum DSM 20469	521095	NC_013203	Apar_1172	ribosomal protein L10	3.57466e-09	unclonable	COG0244
Atopobium parvulum DSM 20469	521095	NC_013203	Apar_1173	ribosomal protein L1	6.49528e-09	unclonable	COG0081
Atopobium parvulum DSM 20469	521095	NC_013203	Apar_1174	ribosomal protein L11	2.46208e-09	unclonable	COG0080
Atopobium parvulum DSM 20469	521095	NC_013203	Apar_1175	NusG antitermination factor	3.64949e-09	unclonable	COG0250
Atopobium parvulum DSM 20469	521095	NC_013203	Apar_1176	preprotein translocase, SecE subunit	1.87146e-09	unclonable	COG0690
Atopobium parvulum DSM 20469	521095	NC_013203	Apar_1177	ribosomal protein L33	9.79821e-10	unclonable	COG0267
Atopobium parvulum DSM 20469	521095	NC_013203	Apar_1178	translation elongation factor Tu	2.42479e-08	unclonable	COG0050
Atopobium parvulum DSM 20469	521095	NC_013203	Apar_1188	transcription elongation factor GreA	0.00439545	decreased coverage	COG0782
Atopobium parvulum DSM 20469	521095	NC_013203	Apar_1218	UDP-N-acetylmuramyl-tripeptide synthetase	0.000328794	decreased coverage	COG0769
Atopobium parvulum DSM 20469	521095	NC_013203	Apar_1232	beta-lactamase domain protein	6.15653e-06	decreased coverage	COG2333
Atopobium parvulum DSM 20469	521095	NC_013203	Apar_1304	ATP synthase F0, A subunit	6.5102e-05	decreased coverage	COG0356
Atopobium parvulum DSM 20469	521095	NC_013203	Apar_1326	CobB/CobQ domain protein glutamine amidotransferase	5.36393e-06	decreased coverage	COG3442
Atopobium parvulum DSM 20469	521095	NC_013203	Apar_1327	Mur ligase middle domain protein	3.99076e-06	decreased coverage	COG0769
Atopobium parvulum DSM 20469	521095	NC_013203	Apar_1331	GCN5-related N-acetyltransferase	5.99156e-09	unclonable	\N
Atopobium parvulum DSM 20469	521095	NC_013203	Apar_1354	ferric uptake regulator, Fur family	2.36384e-09	unclonable	COG0735
Atopobium parvulum DSM 20469	521095	NC_013203	Apar_R0003	tRNA-Ser	6.41066e-10	unclonable	\N
Atopobium parvulum DSM 20469	521095	NC_013203	Apar_R0004	tRNA-Ser	5.51383e-10	unclonable	\N
Atopobium parvulum DSM 20469	521095	NC_013203	Apar_R0006	tRNA-Asp	4.33123e-10	unclonable	\N
Atopobium parvulum DSM 20469	521095	NC_013203	Apar_R0030	tRNA-Val	8.57099e-09	decreased coverage	\N
Atopobium parvulum DSM 20469	521095	NC_013203	Apar_R0036	tRNA-Trp	7.84105e-10	unclonable	\N
Atopobium parvulum DSM 20469	521095	NC_013203	Apar_R0037	tRNA-Met	9.50191e-10	unclonable	\N
Atopobium parvulum DSM 20469	521095	NC_013203	Apar_R0038	tRNA-Thr	9.20806e-10	unclonable	\N
Atopobium parvulum DSM 20469	521095	NC_013203	Apar_R0039	tRNA-Tyr	1.01038e-09	unclonable	\N
Anaerococcus prevotii DSM 20548	525919	NC_013171	Apre_0009	RNA polymerase, sigma 28 subunit, FliA/WhiG subfamily	4.98773e-09	decreased coverage	COG1191
Anaerococcus prevotii DSM 20548	525919	NC_013171	Apre_0010	hypothetical protein	4.57156e-08	decreased coverage	COG2461
Anaerococcus prevotii DSM 20548	525919	NC_013171	Apre_0015	extracellular solute-binding protein family 5	9.73096e-08	unclonable	COG0747
Anaerococcus prevotii DSM 20548	525919	NC_013171	Apre_0016	binding-protein-dependent transport systems inner membrane component	4.61837e-10	unclonable	COG0601
Anaerococcus prevotii DSM 20548	525919	NC_013171	Apre_0038	Na+ dependent nucleoside transporter domain protein	9.07116e-05	decreased coverage	COG1972
Anaerococcus prevotii DSM 20548	525919	NC_013171	Apre_0069	Galactose-6-phosphate isomerase	1.7744e-08	decreased coverage	COG0698
Anaerococcus prevotii DSM 20548	525919	NC_013171	Apre_0083	PTS system, N-acetylglucosamine-specific IIBC subunit	6.36511e-09	unclonable	COG1263
Anaerococcus prevotii DSM 20548	525919	NC_013171	Apre_0084	hypothetical protein	4.35503e-09	decreased coverage	\N
Anaerococcus prevotii DSM 20548	525919	NC_013171	Apre_0095	MaoC domain protein dehydratase	5.82569e-09	decreased coverage	COG2030
Anaerococcus prevotii DSM 20548	525919	NC_013171	Apre_0106	Mg2 transporter protein CorA family protein	1.84046e-07	decreased coverage	COG0598
Anaerococcus prevotii DSM 20548	525919	NC_013171	Apre_0112	\N	5.09087e-08	decreased coverage	COG1263
Anaerococcus prevotii DSM 20548	525919	NC_013171	Apre_0121	potassium uptake protein, TrkH family	2.17077e-09	unclonable	COG0168
Anaerococcus prevotii DSM 20548	525919	NC_013171	Apre_0136	DNA repair protein RadA	3.64921e-08	decreased coverage	COG1066
Anaerococcus prevotii DSM 20548	525919	NC_013171	Apre_0181	hypothetical protein	6.72216e-05	decreased coverage	COG3601
Anaerococcus prevotii DSM 20548	525919	NC_013171	Apre_0200	protein-N(pi)-phosphohistidine--sugar phosphotransferase	2.59121e-07	decreased coverage	COG3444
Anaerococcus prevotii DSM 20548	525919	NC_013171	Apre_0201	phosphotransferase system PTS sorbose-specific IIC subunit	8.93723e-09	decreased coverage	COG3715
Anaerococcus prevotii DSM 20548	525919	NC_013171	Apre_0262	uracil transporter	1.45951e-09	unclonable	COG2233
Anaerococcus prevotii DSM 20548	525919	NC_013171	Apre_0266	carboxyl-terminal protease	5.03976e-08	decreased coverage	COG0793
Anaerococcus prevotii DSM 20548	525919	NC_013171	Apre_0267	magnesium transporter	1.06938e-07	decreased coverage	COG2239
Anaerococcus prevotii DSM 20548	525919	NC_013171	Apre_0295	basic membrane lipoprotein	1.88211e-09	unclonable	COG1744
Anaerococcus prevotii DSM 20548	525919	NC_013171	Apre_0296	ABC transporter related	6.7661e-09	unclonable	COG3845
Anaerococcus prevotii DSM 20548	525919	NC_013171	Apre_0320	AzlC family protein	2.18958e-10	unclonable	COG1296
Anaerococcus prevotii DSM 20548	525919	NC_013171	Apre_0321	hypothetical protein	2.14801e-09	unclonable	COG2509
Anaerococcus prevotii DSM 20548	525919	NC_013171	Apre_0322	dipeptidylaminopeptidase/acylaminoacyl- peptidase-like protein	3.37661e-10	unclonable	COG1506
Anaerococcus prevotii DSM 20548	525919	NC_013171	Apre_0323	hypothetical protein	1.75392e-09	unclonable	COG1196
Anaerococcus prevotii DSM 20548	525919	NC_013171	Apre_0359	hypothetical protein	3.92e-06	decreased coverage	\N
Anaerococcus prevotii DSM 20548	525919	NC_013171	Apre_0360	hypothetical protein	7.17889e-08	decreased coverage	COG2068
Anaerococcus prevotii DSM 20548	525919	NC_013171	Apre_0379	CutC family protein	7.28727e-09	decreased coverage	COG3142
Anaerococcus prevotii DSM 20548	525919	NC_013171	Apre_0386	protein of unknown function DUF77	3.21713e-09	decreased coverage	COG0011
Anaerococcus prevotii DSM 20548	525919	NC_013171	Apre_0397	sodium:dicarboxylate symporter	2.67322e-06	decreased coverage	COG1301
Anaerococcus prevotii DSM 20548	525919	NC_013171	Apre_0453	PTS system, alpha-glucoside-specific IIBC subunit	8.81865e-09	unclonable	COG1263,COG1264
Anaerococcus prevotii DSM 20548	525919	NC_013171	Apre_0454	glycoside hydrolase family 4	2.62925e-09	unclonable	COG1486
Anaerococcus prevotii DSM 20548	525919	NC_013171	Apre_0455	putative transcriptional regulator, RpiR family	1.71967e-10	unclonable	COG1737
Anaerococcus prevotii DSM 20548	525919	NC_013171	Apre_0456	transcriptional regulator, RpiR family	2.84572e-10	unclonable	COG1737
Anaerococcus prevotii DSM 20548	525919	NC_013171	Apre_0457	ribosomal protein S12	9.30962e-11	unclonable	COG0048
Anaerococcus prevotii DSM 20548	525919	NC_013171	Apre_0465	binding-protein-dependent transport systems inner membrane component	2.43016e-07	decreased coverage	COG0601
Anaerococcus prevotii DSM 20548	525919	NC_013171	Apre_0476	putative virion core protein	4.18694e-07	decreased coverage	COG4260
Anaerococcus prevotii DSM 20548	525919	NC_013171	Apre_0477	sortase B cell surface sorting signal	3.83377e-08	decreased coverage	\N
Anaerococcus prevotii DSM 20548	525919	NC_013171	Apre_0486	membrane-bound proton-translocating pyrophosphatase	2.46606e-08	unclonable	COG3808
Anaerococcus prevotii DSM 20548	525919	NC_013171	Apre_0499	YodA domain protein	3.47899e-09	decreased coverage	COG3443
Anaerococcus prevotii DSM 20548	525919	NC_013171	Apre_0557	hypothetical protein	5.98736e-07	decreased coverage	\N
Anaerococcus prevotii DSM 20548	525919	NC_013171	Apre_0558	hypothetical protein	6.23163e-08	decreased coverage	\N
Anaerococcus prevotii DSM 20548	525919	NC_013171	Apre_0561	copper-translocating P-type ATPase	7.8607e-08	unclonable	COG2217
Anaerococcus prevotii DSM 20548	525919	NC_013171	Apre_0573	Citrate transporter	1.30469e-09	unclonable	\N
Anaerococcus prevotii DSM 20548	525919	NC_013171	Apre_0605	carbon starvation protein CstA	1.90307e-09	unclonable	COG1966
Anaerococcus prevotii DSM 20548	525919	NC_013171	Apre_0606	protein of unknown function DUF150	6.62285e-11	unclonable	COG0779
Anaerococcus prevotii DSM 20548	525919	NC_013171	Apre_0634	periplasmic binding protein	1.0772e-09	unclonable	COG4607
Anaerococcus prevotii DSM 20548	525919	NC_013171	Apre_0655	acetate kinase	4.14678e-08	decreased coverage	COG0282
Anaerococcus prevotii DSM 20548	525919	NC_013171	Apre_0670	ribosomal protein L28	4.25645e-11	unclonable	COG0227
Anaerococcus prevotii DSM 20548	525919	NC_013171	Apre_0701	periplasmic solute binding protein	7.05514e-10	unclonable	COG0803
Anaerococcus prevotii DSM 20548	525919	NC_013171	Apre_0750	transcription termination factor Rho	7.55075e-08	decreased coverage	COG1158
Anaerococcus prevotii DSM 20548	525919	NC_013171	Apre_0751	ribosomal protein L31	2.24583e-09	decreased coverage	COG0254
Anaerococcus prevotii DSM 20548	525919	NC_013171	Apre_0752	modification methylase, HemK family	1.41124e-08	decreased coverage	COG2890
Anaerococcus prevotii DSM 20548	525919	NC_013171	Apre_0813	endodeoxyribonuclease RusA	4.38837e-11	unclonable	\N
Anaerococcus prevotii DSM 20548	525919	NC_013171	Apre_0849	phage tail tape measure protein, TP901 family	0.000280434	decreased coverage	COG5280
Anaerococcus prevotii DSM 20548	525919	NC_013171	Apre_0850	hypothetical protein	0.000175347	decreased coverage	\N
Anaerococcus prevotii DSM 20548	525919	NC_013171	Apre_0864	peptidoglycan hydrolase	9.39547e-09	decreased coverage	\N
Anaerococcus prevotii DSM 20548	525919	NC_013171	Apre_0865	hypothetical protein	1.50603e-09	decreased coverage	\N
Anaerococcus prevotii DSM 20548	525919	NC_013171	Apre_0885	protein of unknown function DUF161	4.34482e-10	unclonable	COG1284
Anaerococcus prevotii DSM 20548	525919	NC_013171	Apre_0925	thiamine biosynthesis/tRNA modification protein ThiI	1.71827e-09	unclonable	COG0301
Anaerococcus prevotii DSM 20548	525919	NC_013171	Apre_0926	ribosomal protein L21	5.98947e-11	unclonable	COG0261
Anaerococcus prevotii DSM 20548	525919	NC_013171	Apre_0964	histone family protein DNA-binding protein	9.94236e-09	decreased coverage	COG0776
Anaerococcus prevotii DSM 20548	525919	NC_013171	Apre_0965	hypothetical protein	9.47907e-08	decreased coverage	\N
Anaerococcus prevotii DSM 20548	525919	NC_013171	Apre_0985	domain of unknown function DUF1727	2.65712e-09	unclonable	COG0769
Anaerococcus prevotii DSM 20548	525919	NC_013171	Apre_1042	pyruvate ferredoxin/flavodoxin oxidoreductase	5.72924e-06	unclonable	COG0674
Anaerococcus prevotii DSM 20548	525919	NC_013171	Apre_1064	sodium:dicarboxylate symporter	1.88211e-09	unclonable	COG1301
Anaerococcus prevotii DSM 20548	525919	NC_013171	Apre_1113	major facilitator superfamily MFS_1	3.78306e-07	decreased coverage	COG2814
Anaerococcus prevotii DSM 20548	525919	NC_013171	Apre_1125	PSP1 domain protein	7.05514e-10	unclonable	COG1774
Anaerococcus prevotii DSM 20548	525919	NC_013171	Apre_1126	DNA polymerase III gamma/tau subunits-like protein	6.50925e-10	unclonable	COG2812
Anaerococcus prevotii DSM 20548	525919	NC_013171	Apre_1127	protein of unknown function DUF970	1.58497e-10	unclonable	COG3870
Anaerococcus prevotii DSM 20548	525919	NC_013171	Apre_1128	thymidylate kinase	3.77122e-10	unclonable	COG0125
Anaerococcus prevotii DSM 20548	525919	NC_013171	Apre_1129	ribosomal 5S rRNA E-loop binding protein Ctc/L25/TL5	4.8094e-10	unclonable	COG1825
Anaerococcus prevotii DSM 20548	525919	NC_013171	Apre_1130	Redoxin domain protein	2.3732e-10	unclonable	COG2077
Anaerococcus prevotii DSM 20548	525919	NC_013171	Apre_1131	tetrahydrofolate dehydrogenase/cyclohydrolase	6.2507e-10	unclonable	COG0190
Anaerococcus prevotii DSM 20548	525919	NC_013171	Apre_1132	NLP/P60 protein	1.55845e-08	unclonable	COG0791
Anaerococcus prevotii DSM 20548	525919	NC_013171	Apre_1137	transcriptional regulator, AraC family	1.01216e-07	decreased coverage	COG2207
Anaerococcus prevotii DSM 20548	525919	NC_013171	Apre_1138	hypothetical protein	1.96047e-10	unclonable	\N
Anaerococcus prevotii DSM 20548	525919	NC_013171	Apre_1146	ribosomal protein L1	2.84572e-10	unclonable	COG0081
Anaerococcus prevotii DSM 20548	525919	NC_013171	Apre_1188	ABC transporter related	1.2355e-08	unclonable	COG1132
Anaerococcus prevotii DSM 20548	525919	NC_013171	Apre_1196	SNARE associated Golgi protein	1.86388e-10	unclonable	COG0398
Anaerococcus prevotii DSM 20548	525919	NC_013171	Apre_1218	hypothetical protein	3.75715e-08	decreased coverage	\N
Anaerococcus prevotii DSM 20548	525919	NC_013171	Apre_1225	putative protein of poly-gamma-glutamate biosynthesis (capsule formation)	3.0938e-09	unclonable	COG2843
Anaerococcus prevotii DSM 20548	525919	NC_013171	Apre_1226	extracellular solute-binding protein family 1	1.35939e-09	unclonable	COG0687
Anaerococcus prevotii DSM 20548	525919	NC_013171	Apre_1227	binding-protein-dependent transport systems inner membrane component	3.77122e-10	unclonable	COG1177
Anaerococcus prevotii DSM 20548	525919	NC_013171	Apre_1228	binding-protein-dependent transport systems inner membrane component	4.9585e-10	unclonable	COG1176
Anaerococcus prevotii DSM 20548	525919	NC_013171	Apre_1229	ABC transporter related	1.35939e-09	unclonable	COG3842
Anaerococcus prevotii DSM 20548	525919	NC_013171	Apre_1230	sodium:dicarboxylate symporter	1.70025e-09	unclonable	COG1301
Anaerococcus prevotii DSM 20548	525919	NC_013171	Apre_1245	sodium:neurotransmitter symporter	5.15099e-09	unclonable	COG0733
Anaerococcus prevotii DSM 20548	525919	NC_013171	Apre_1262	hypothetical protein	5.05046e-11	unclonable	\N
Anaerococcus prevotii DSM 20548	525919	NC_013171	Apre_1263	hypothetical protein	1.70167e-10	unclonable	\N
Anaerococcus prevotii DSM 20548	525919	NC_013171	Apre_1275	cell envelope-related transcriptional attenuator	1.50477e-09	unclonable	COG1316
Anaerococcus prevotii DSM 20548	525919	NC_013171	Apre_1292	Ribonuclease H	3.58144e-07	decreased coverage	COG0164
Anaerococcus prevotii DSM 20548	525919	NC_013171	Apre_1293	GTP-binding protein HSR1-related	2.7879e-10	unclonable	COG1161
Anaerococcus prevotii DSM 20548	525919	NC_013171	Apre_1305	putative helix-turn-helix protein YlxM/p13 family protein	1.61782e-10	unclonable	COG2739
Anaerococcus prevotii DSM 20548	525919	NC_013171	Apre_1306	peptidase S1 and S6 chymotrypsin/Hap	6.92323e-08	decreased coverage	COG0265
Anaerococcus prevotii DSM 20548	525919	NC_013171	Apre_1307	ABC-2 type transporter	3.98946e-08	decreased coverage	\N
Anaerococcus prevotii DSM 20548	525919	NC_013171	Apre_1308	hypothetical protein	3.75715e-08	decreased coverage	COG0842
Anaerococcus prevotii DSM 20548	525919	NC_013171	Apre_1309	ABC transporter related	2.89319e-08	decreased coverage	COG1131
Anaerococcus prevotii DSM 20548	525919	NC_013171	Apre_1321	protein of unknown function DUF1312	1.02941e-10	unclonable	COG5341
Anaerococcus prevotii DSM 20548	525919	NC_013171	Apre_1322	electron transport complex, RnfABCDGE type, B subunit	1.22015e-08	decreased coverage	COG2878
Anaerococcus prevotii DSM 20548	525919	NC_013171	Apre_1323	electron transport complex, RnfABCDGE type, A subunit	5.34206e-09	decreased coverage	COG4657
Anaerococcus prevotii DSM 20548	525919	NC_013171	Apre_1324	electron transport complex, RnfABCDGE type, E subunit	6.80415e-09	decreased coverage	COG4660
Anaerococcus prevotii DSM 20548	525919	NC_013171	Apre_1344	translation initiation factor IF-3	1.82733e-06	decreased coverage	COG0290
Anaerococcus prevotii DSM 20548	525919	NC_013171	Apre_1345	transcriptional regulator, MarR family	1.42864e-06	decreased coverage	COG1846
Anaerococcus prevotii DSM 20548	525919	NC_013171	Apre_1356	acyl-CoA dehydrogenase domain protein	1.00384e-09	unclonable	COG1960
Anaerococcus prevotii DSM 20548	525919	NC_013171	Apre_1357	D-lactate dehydrogenase (cytochrome)	3.25772e-09	unclonable	COG0277
Anaerococcus prevotii DSM 20548	525919	NC_013171	Apre_1367	transcriptional regulator, MarR family	1.23372e-10	unclonable	COG1846
Anaerococcus prevotii DSM 20548	525919	NC_013171	Apre_1368	ATPase associated with various cellular activities AAA_5	5.2679e-10	unclonable	COG0714
Anaerococcus prevotii DSM 20548	525919	NC_013171	Apre_1370	integral membrane protein MviN	4.11577e-09	unclonable	COG0728
Anaerococcus prevotii DSM 20548	525919	NC_013171	Apre_1379	ABC-type phosphate transport system periplasmic component-like protein	7.88807e-10	unclonable	COG0226
Anaerococcus prevotii DSM 20548	525919	NC_013171	Apre_1380	PfkB domain protein	8.7223e-10	unclonable	COG0524
Anaerococcus prevotii DSM 20548	525919	NC_013171	Apre_1381	TRAP dicarboxylate transporter, DctM subunit	2.4748e-09	unclonable	COG1593
Anaerococcus prevotii DSM 20548	525919	NC_013171	Apre_1395	ribosomal protein L13	1.19663e-10	unclonable	COG0102
Anaerococcus prevotii DSM 20548	525919	NC_013171	Apre_1396	hydroxymethylpyrimidine transporter CytX	1.55309e-09	unclonable	COG1457
Anaerococcus prevotii DSM 20548	525919	NC_013171	Apre_1397	phosphomethylpyrimidine kinase	3.85147e-10	unclonable	COG0351
Anaerococcus prevotii DSM 20548	525919	NC_013171	Apre_1398	cation transporter	2.71372e-09	unclonable	COG0168
Anaerococcus prevotii DSM 20548	525919	NC_013171	Apre_1399	TrkA-N domain protein	2.00171e-09	unclonable	COG0569
Anaerococcus prevotii DSM 20548	525919	NC_013171	Apre_1400	Na+/H+ antiporter NhaC	5.09696e-09	unclonable	COG1757
Anaerococcus prevotii DSM 20548	525919	NC_013171	Apre_1425	xanthine permease	4.66476e-08	decreased coverage	COG2233
Anaerococcus prevotii DSM 20548	525919	NC_013171	Apre_1507	hypothetical protein	1.23255e-08	decreased coverage	\N
Anaerococcus prevotii DSM 20548	525919	NC_013171	Apre_1508	glutaredoxin	1.14631e-09	decreased coverage	COG0695
Anaerococcus prevotii DSM 20548	525919	NC_013171	Apre_1509	dimethyladenosine transferase	4.52453e-10	unclonable	COG0030
Anaerococcus prevotii DSM 20548	525919	NC_013171	Apre_1510	primase/topoisomerase like protein	4.57105e-09	decreased coverage	COG1658
Anaerococcus prevotii DSM 20548	525919	NC_013171	Apre_1511	hydrolase, TatD family	9.02805e-09	decreased coverage	COG0084
Anaerococcus prevotii DSM 20548	525919	NC_013171	Apre_1512	methionyl-tRNA synthetase	5.47947e-07	decreased coverage	COG0143
Anaerococcus prevotii DSM 20548	525919	NC_013171	Apre_1513	amino acid carrier protein	7.93212e-08	decreased coverage	COG1115
Anaerococcus prevotii DSM 20548	525919	NC_013171	Apre_1514	tyrosyl-tRNA synthetase	1.30469e-09	unclonable	COG0162
Anaerococcus prevotii DSM 20548	525919	NC_013171	Apre_1532	polar amino acid ABC transporter, inner membrane subunit	7.42364e-09	unclonable	COG0765
Anaerococcus prevotii DSM 20548	525919	NC_013171	Apre_1576	protein of unknown function DUF344	3.6062e-09	unclonable	COG2326
Anaerococcus prevotii DSM 20548	525919	NC_013171	Apre_1577	protein of unknown function DUF1113	2.70408e-10	unclonable	COG4905
Anaerococcus prevotii DSM 20548	525919	NC_013171	Apre_1578	Na+/H+ antiporter NhaC	3.32533e-09	unclonable	COG1757
Anaerococcus prevotii DSM 20548	525919	NC_013171	Apre_1592	sugar (Glycoside-Pentoside-Hexuronide) transporter	0.00442608	decreased coverage	COG2211
Anaerococcus prevotii DSM 20548	525919	NC_013171	Apre_1603	alpha amylase catalytic region	9.68128e-06	decreased coverage	COG0366
Anaerococcus prevotii DSM 20548	525919	NC_013171	Apre_1614	Alcohol dehydrogenase GroES domain protein	2.16473e-08	decreased coverage	COG1063
Anaerococcus prevotii DSM 20548	525919	NC_013171	Apre_1642	RNA polymerase, sigma 32 subunit, RpoH	1.92835e-08	decreased coverage	COG0568
Anaerococcus prevotii DSM 20548	525919	NC_013171	Apre_1665	PTS system fructose subfamily IIA component	4.18969e-08	decreased coverage	COG2893
Anaerococcus prevotii DSM 20548	525919	NC_013171	Apre_1666	\N	4.20349e-09	unclonable	COG1653
Anaerococcus prevotii DSM 20548	525919	NC_013171	Apre_1682	protein of unknown function DUF21	4.71578e-05	decreased coverage	COG1253
Anaerococcus prevotii DSM 20548	525919	NC_013171	Apre_1683	Na+/H+ antiporter NhaC	0.00319882	decreased coverage	COG1757
Anaerococcus prevotii DSM 20548	525919	NC_013171	Apre_1701	RDD domain containing protein	4.82282e-08	decreased coverage	COG1714
Anaerococcus prevotii DSM 20548	525919	NC_013171	Apre_1702	signal peptide peptidase SppA, 36K type	2.1867e-08	decreased coverage	COG0616
Anaerococcus prevotii DSM 20548	525919	NC_013171	Apre_1734	Na/Pi-cotransporter II-related protein	1.08248e-08	unclonable	COG1283
Anaerococcus prevotii DSM 20548	525919	NC_013164	Apre_1745	ABC transporter related	0.000253121	decreased coverage	COG1132
Anaerococcus prevotii DSM 20548	525919	NC_013164	Apre_1851	hypothetical protein	1.13905e-05	decreased coverage	COG4585
Anaerococcus prevotii DSM 20548	525919	NC_013164	Apre_1852	two component transcriptional regulator, LuxR family	0.000213283	decreased coverage	COG2197
Arthrobacter sp. FB24	290399	NC_008541	Arth_0483	NAD-dependent epimerase/dehydratase	0.00129402	decreased coverage	COG0451
Arthrobacter sp. FB24	290399	NC_008541	Arth_0813	ATP-dependent DNA helicase PcrA	0.00156939	decreased coverage	COG0210
Arthrobacter sp. FB24	290399	NC_008541	Arth_0833	inositol 2-dehydrogenase	0.000914593	decreased coverage	COG0673
Arthrobacter sp. FB24	290399	NC_008541	Arth_0955	UBA/THIF-type NAD/FAD binding protein	5.16657e-05	decreased coverage	COG0476
Arthrobacter sp. FB24	290399	NC_008541	Arth_1091	hypothetical protein	6.77339e-08	decreased coverage	COG3591
Arthrobacter sp. FB24	290399	NC_008541	Arth_1177	peptidase A24A, prepilin type IV	0.00632906	decreased coverage	\N
Arthrobacter sp. FB24	290399	NC_008541	Arth_1178	NUDIX hydrolase	0.0049447	decreased coverage	COG2816
Arthrobacter sp. FB24	290399	NC_008541	Arth_1179	EmrB/QacA family drug resistance transporter	0.00903391	decreased coverage	COG2814
Arthrobacter sp. FB24	290399	NC_008541	Arth_1415	hypothetical protein	0.00199803	decreased coverage	COG2740
Arthrobacter sp. FB24	290399	NC_008541	Arth_1438	LuxR family transcriptional regulator	0.0017227	decreased coverage	\N
Arthrobacter sp. FB24	290399	NC_008541	Arth_1458	MarR family transcriptional regulator	0.00644177	decreased coverage	COG1846
Arthrobacter sp. FB24	290399	NC_008541	Arth_1459	hypothetical protein	0.00288018	decreased coverage	\N
Arthrobacter sp. FB24	290399	NC_008541	Arth_1466	small GTP-binding protein	0.00807526	decreased coverage	COG2262
Arthrobacter sp. FB24	290399	NC_008541	Arth_1615	major facilitator transporter	0.000129753	decreased coverage	COG2271
Arthrobacter sp. FB24	290399	NC_008541	Arth_1634	hypothetical protein	0.00156977	decreased coverage	\N
Arthrobacter sp. FB24	290399	NC_008541	Arth_1655	acetyl-CoA acetyltransferases	0.00972339	decreased coverage	COG0183
Arthrobacter sp. FB24	290399	NC_008541	Arth_1686	hypothetical protein	0.00366824	decreased coverage	\N
Arthrobacter sp. FB24	290399	NC_008541	Arth_1744	L-alanine dehydrogenase	0.00361156	decreased coverage	COG0686
Arthrobacter sp. FB24	290399	NC_008541	Arth_1800	D-isomer specific 2-hydroxyacid dehydrogenase, NAD-binding	0.00330988	decreased coverage	COG0111
Arthrobacter sp. FB24	290399	NC_008541	Arth_1811	ABC transporter related	0.00289263	decreased coverage	COG1129
Arthrobacter sp. FB24	290399	NC_008541	Arth_1891	glycoside hydrolase family protein	0.001415	decreased coverage	COG2723
Arthrobacter sp. FB24	290399	NC_008541	Arth_1892	PTS system, beta-glucoside-specific IIABC subunit	2.4125e-05	decreased coverage	COG1263,COG2190
Arthrobacter sp. FB24	290399	NC_008541	Arth_2065	30S ribosomal protein S1	0.00632138	decreased coverage	COG0539
Arthrobacter sp. FB24	290399	NC_008541	Arth_2081	phospholipid/glycerol acyltransferase	0.00967199	decreased coverage	COG0204
Arthrobacter sp. FB24	290399	NC_008541	Arth_2130	hypothetical protein	0.000290153	decreased coverage	COG2855
Arthrobacter sp. FB24	290399	NC_008541	Arth_2131	hypothetical protein	0.0038643	decreased coverage	COG2308
Arthrobacter sp. FB24	290399	NC_008541	Arth_2167	undecaprenyl pyrophosphate phosphatase	0.00790926	decreased coverage	COG1968
Arthrobacter sp. FB24	290399	NC_008541	Arth_2172	tRNA (adenine-58-N(1)-) methyltransferase	0.00868355	decreased coverage	COG2519
Arthrobacter sp. FB24	290399	NC_008541	Arth_2176	proteasome subunit beta	0.00215811	decreased coverage	COG0638
Arthrobacter sp. FB24	290399	NC_008541	Arth_2177	20S proteasome, A and B subunits	0.0017271	decreased coverage	COG0638
Arthrobacter sp. FB24	290399	NC_008541	Arth_2194	hypothetical protein	0.000105855	decreased coverage	\N
Arthrobacter sp. FB24	290399	NC_008541	Arth_2203	antibiotic biosynthesis monooxygenase	0.00034688	decreased coverage	\N
Arthrobacter sp. FB24	290399	NC_008541	Arth_2216	cytochrome-c oxidase	0.00587232	decreased coverage	COG0843
Arthrobacter sp. FB24	290399	NC_008541	Arth_2229	GTP-binding protein Era	0.00352178	decreased coverage	COG1159
Arthrobacter sp. FB24	290399	NC_008541	Arth_2233	hypothetical protein	0.00153941	decreased coverage	\N
Arthrobacter sp. FB24	290399	NC_008541	Arth_2234	16S ribosomal RNA methyltransferase RsmE	0.00121971	decreased coverage	COG1385
Arthrobacter sp. FB24	290399	NC_008541	Arth_2249	major intrinsic protein	2.22007e-05	decreased coverage	COG0580
Arthrobacter sp. FB24	290399	NC_008541	Arth_2278	alanyl-tRNA synthetase	0.00416969	decreased coverage	COG0013
Arthrobacter sp. FB24	290399	NC_008541	Arth_2295	hypothetical protein	0.00478543	decreased coverage	\N
Arthrobacter sp. FB24	290399	NC_008541	Arth_2296	hypothetical protein	0.00826774	decreased coverage	\N
Arthrobacter sp. FB24	290399	NC_008541	Arth_2308	NUDIX hydrolase	0.000433057	decreased coverage	COG1051
Arthrobacter sp. FB24	290399	NC_008541	Arth_2316	histidine triad (HIT) protein	0.00279696	decreased coverage	COG0537
Arthrobacter sp. FB24	290399	NC_008541	Arth_2318	DNA polymerase III, alpha subunit	0.00938531	decreased coverage	COG0587
Arthrobacter sp. FB24	290399	NC_008541	Arth_2319	hypothetical protein	0.00289895	decreased coverage	\N
Arthrobacter sp. FB24	290399	NC_008541	Arth_2337	polysaccharide deacetylase	0.00797389	decreased coverage	COG0726
Arthrobacter sp. FB24	290399	NC_008541	Arth_2382	alkylphosphonate utilization operon protein PhnA	0.00334109	decreased coverage	COG2824
Arthrobacter sp. FB24	290399	NC_008541	Arth_2406	trigger factor	0.0022242	decreased coverage	COG0544
Arthrobacter sp. FB24	290399	NC_008541	Arth_2416	hypothetical protein	0.000448238	decreased coverage	\N
Arthrobacter sp. FB24	290399	NC_008541	Arth_2442	hypothetical protein	0.00412496	decreased coverage	COG3022
Arthrobacter sp. FB24	290399	NC_008541	Arth_2466	putative malonyl-CoA:acyl carrier protein malonyltransferase	9.80715e-05	decreased coverage	COG0331
Arthrobacter sp. FB24	290399	NC_008541	Arth_2467	3-oxoacyl-(acyl carrier protein) synthase III	0.000376191	decreased coverage	COG0332
Arthrobacter sp. FB24	290399	NC_008541	Arth_2529	branched chain amino acid aminotransferase	0.00227274	decreased coverage	COG0115
Arthrobacter sp. FB24	290399	NC_008541	Arth_2530	3-isopropylmalate dehydrogenase	0.000736484	decreased coverage	COG0473
Arthrobacter sp. FB24	290399	NC_008541	Arth_2537	ketol-acid reductoisomerase	0.00800327	decreased coverage	COG0059
Arthrobacter sp. FB24	290399	NC_008541	Arth_2544	hypothetical protein	0.00622914	decreased coverage	\N
Arthrobacter sp. FB24	290399	NC_008541	Arth_2545	MarR family transcriptional regulator	0.00936337	decreased coverage	COG1846
Arthrobacter sp. FB24	290399	NC_008541	Arth_2549	malate:quinone oxidoreductase	0.00140506	decreased coverage	COG0579
Arthrobacter sp. FB24	290399	NC_008541	Arth_2582	hypothetical protein	0.000119552	decreased coverage	COG1234
Arthrobacter sp. FB24	290399	NC_008541	Arth_2583	glutamate racemase	0.00016554	decreased coverage	COG0796
Arthrobacter sp. FB24	290399	NC_008541	Arth_2601	hypothetical protein	0.00218331	decreased coverage	COG2898
Arthrobacter sp. FB24	290399	NC_008541	Arth_2602	putative esterase	0.00037083	decreased coverage	COG2382
Arthrobacter sp. FB24	290399	NC_008541	Arth_2616	WecB/TagA/CpsF family glycosyl transferase	0.00218629	decreased coverage	COG1922
Arthrobacter sp. FB24	290399	NC_008541	Arth_2633	histidine triad (HIT) protein	0.00206121	decreased coverage	COG0537
Arthrobacter sp. FB24	290399	NC_008541	Arth_2634	alcohol dehydrogenase	0.00621728	decreased coverage	COG1064
Arthrobacter sp. FB24	290399	NC_008541	Arth_2653	3-phosphoshikimate 1-carboxyvinyltransferase	0.000365317	decreased coverage	COG0128
Arthrobacter sp. FB24	290399	NC_008541	Arth_2676	glycosyl transferase, group 1	0.00158142	decreased coverage	COG0438
Arthrobacter sp. FB24	290399	NC_008541	Arth_2704	hypothetical protein	0.00973242	decreased coverage	\N
Arthrobacter sp. FB24	290399	NC_008541	Arth_2713	integral membrane protein	0.000899465	decreased coverage	COG4781
Arthrobacter sp. FB24	290399	NC_008541	Arth_2746	hypothetical protein	2.46717e-05	decreased coverage	\N
Arthrobacter sp. FB24	290399	NC_008541	Arth_2767	porphobilinogen deaminase	0.00352178	decreased coverage	COG0181
Arthrobacter sp. FB24	290399	NC_008541	Arth_2809	TetR family transcriptional regulator	0.00640157	decreased coverage	COG3226
Arthrobacter sp. FB24	290399	NC_008541	Arth_2838	aminotransferase AlaT	0.00546919	decreased coverage	COG0436
Arthrobacter sp. FB24	290399	NC_008541	Arth_2840	binding-protein-dependent transport systems inner membrane component	0.00306406	decreased coverage	COG1174
Arthrobacter sp. FB24	290399	NC_008541	Arth_2841	binding-protein-dependent transport systems inner membrane component	0.00717598	decreased coverage	COG1174
Arthrobacter sp. FB24	290399	NC_008541	Arth_2842	ABC transporter related	0.00414619	decreased coverage	COG1125
Arthrobacter sp. FB24	290399	NC_008541	Arth_2874	inosine 5-monophosphate dehydrogenase	0.00446551	decreased coverage	COG0516
Arthrobacter sp. FB24	290399	NC_008541	Arth_2888	hypothetical protein	0.00389281	decreased coverage	\N
Arthrobacter sp. FB24	290399	NC_008541	Arth_2923	hypothetical protein	0.00621975	decreased coverage	\N
Arthrobacter sp. FB24	290399	NC_008541	Arth_2960	50S ribosomal protein L18P	0.00477287	decreased coverage	COG0256
Arthrobacter sp. FB24	290399	NC_008541	Arth_2962	30S ribosomal protein S8	0.00876753	decreased coverage	COG0096
Arthrobacter sp. FB24	290399	NC_008541	Arth_3045	hypothetical protein	1.14501e-06	decreased coverage	\N
Arthrobacter sp. FB24	290399	NC_008541	Arth_3046	ECF subfamily RNA polymerase sigma-24 factor	1.87373e-07	decreased coverage	COG1595
Arthrobacter sp. FB24	290399	NC_008541	Arth_3053	glutathionylspermidine synthase	0.00288809	decreased coverage	COG0754
Arthrobacter sp. FB24	290399	NC_008541	Arth_3148	binding-protein-dependent transport systems inner membrane component	0.00417428	decreased coverage	COG0395
Arthrobacter sp. FB24	290399	NC_008541	Arth_3178	S-layer domain-containing protein	0.0033347	unclonable	\N
Arthrobacter sp. FB24	290399	NC_008541	Arth_3258	Ferritin, Dps family protein	0.000744438	decreased coverage	COG1528
Arthrobacter sp. FB24	290399	NC_008541	Arth_3325	Beta-galactosidase	0.0011475	decreased coverage	COG1874
Arthrobacter sp. FB24	290399	NC_008541	Arth_3326	extracellular solute-binding protein	3.98294e-06	decreased coverage	COG1653
Arthrobacter sp. FB24	290399	NC_008541	Arth_3633	hypothetical protein	4.48571e-08	unclonable	\N
Arthrobacter sp. FB24	290399	NC_008541	Arth_3679	FG-GAP repeat-containing protein	6.68501e-06	decreased coverage	\N
Arthrobacter sp. FB24	290399	NC_008541	Arth_3955	xylose isomerase domain-containing protein	0.00177251	decreased coverage	COG1082
Arthrobacter sp. FB24	290399	NC_008539	Arth_4228	hypothetical protein	3.90985e-08	decreased coverage	\N
Arthrobacter sp. FB24	290399	NC_008539	Arth_4240	hypothetical protein	0.0072533	decreased coverage	COG5483
Arthrobacter sp. FB24	290399	NC_008538	Arth_4355	ABC-type nitrate/sulfonate/bicarbonate transport systems periplasmic components	4.18029e-05	decreased coverage	COG0715
Arthrobacter sp. FB24	290399	NC_008537	Arth_4399	hypothetical protein	0.000669872	decreased coverage	\N
Arthrobacter sp. FB24	290399	NC_008541	Arth_R0041	tRNA-Ala	0.00164455	decreased coverage	\N
Anaerocellum thermophilum DSM 6725	521460	NC_012034	Athe_0006	DNA gyrase, B subunit	2.73734e-06	decreased coverage	COG0187
Anaerocellum thermophilum DSM 6725	521460	NC_012034	Athe_0014	hypothetical protein	1.08222e-06	decreased coverage	\N
Anaerocellum thermophilum DSM 6725	521460	NC_012034	Athe_0015	hypothetical protein	7.31921e-08	decreased coverage	\N
Anaerocellum thermophilum DSM 6725	521460	NC_012034	Athe_0016	hypothetical protein	1.29291e-06	decreased coverage	\N
Anaerocellum thermophilum DSM 6725	521460	NC_012034	Athe_0017	hypothetical protein	1.00891e-07	decreased coverage	\N
Anaerocellum thermophilum DSM 6725	521460	NC_012034	Athe_0022	LexA repressor	1.8035e-05	decreased coverage	COG1974
Anaerocellum thermophilum DSM 6725	521460	NC_012034	Athe_0050	Zn-dependent hydrolase of the beta-lactamase fold-like protein	3.02941e-09	decreased coverage	COG2220
Anaerocellum thermophilum DSM 6725	521460	NC_012034	Athe_0066	hypothetical protein	1.22111e-10	unclonable	\N
Anaerocellum thermophilum DSM 6725	521460	NC_012034	Athe_0067	hypothetical protein	7.00421e-10	unclonable	\N
Anaerocellum thermophilum DSM 6725	521460	NC_012034	Athe_0068	Abortive infection protein	8.58649e-10	unclonable	\N
Anaerocellum thermophilum DSM 6725	521460	NC_012034	Athe_0069	hypothetical protein	5.77809e-11	unclonable	\N
Anaerocellum thermophilum DSM 6725	521460	NC_012034	Athe_0070	hypothetical protein	2.32176e-11	unclonable	\N
Anaerocellum thermophilum DSM 6725	521460	NC_012034	Athe_0071	\N	1.08711e-09	unclonable	\N
Anaerocellum thermophilum DSM 6725	521460	NC_012034	Athe_0088	hypothetical protein	6.1303e-06	decreased coverage	\N
Anaerocellum thermophilum DSM 6725	521460	NC_012034	Athe_0118	transcriptional regulator, GntR family	8.89333e-10	decreased coverage	COG1725
Anaerocellum thermophilum DSM 6725	521460	NC_012034	Athe_0119	hypothetical protein	2.13582e-09	decreased coverage	\N
Anaerocellum thermophilum DSM 6725	521460	NC_012034	Athe_0146	transcriptional regulator, DeoR family	2.30525e-10	unclonable	COG1349
Anaerocellum thermophilum DSM 6725	521460	NC_012034	Athe_0161	hypothetical protein	1.58146e-09	unclonable	\N
Anaerocellum thermophilum DSM 6725	521460	NC_012034	Athe_0172	Uroporphyrin-III C/tetrapyrrole (Corrin/Porphyrin) methyltransferase	1.23849e-09	unclonable	COG0313
Anaerocellum thermophilum DSM 6725	521460	NC_012034	Athe_0173	transcriptional regulator, AbrB family	9.01689e-11	unclonable	COG2002
Anaerocellum thermophilum DSM 6725	521460	NC_012034	Athe_0181	extracellular solute-binding protein family 1	4.97192e-05	decreased coverage	COG1653
Anaerocellum thermophilum DSM 6725	521460	NC_012034	Athe_0202	ABC transporter related	5.28171e-07	unclonable	COG1132
Anaerocellum thermophilum DSM 6725	521460	NC_012034	Athe_0230	hypothetical protein	1.28695e-09	decreased coverage	\N
Anaerocellum thermophilum DSM 6725	521460	NC_012034	Athe_0251	ABC-type bacteriocin transporter	0.000911417	decreased coverage	COG2274
Anaerocellum thermophilum DSM 6725	521460	NC_012034	Athe_0271	hypothetical protein	1.42448e-08	decreased coverage	\N
Anaerocellum thermophilum DSM 6725	521460	NC_012034	Athe_0272	PilT protein domain protein	9.77844e-11	unclonable	COG1848
Anaerocellum thermophilum DSM 6725	521460	NC_012034	Athe_0297	hypothetical protein	2.22565e-05	decreased coverage	\N
Anaerocellum thermophilum DSM 6725	521460	NC_012034	Athe_0328	hypothetical protein	0.00489922	decreased coverage	COG1566
Anaerocellum thermophilum DSM 6725	521460	NC_012034	Athe_0347	hypothetical protein	6.01753e-10	unclonable	\N
Anaerocellum thermophilum DSM 6725	521460	NC_012034	Athe_0348	hypothetical protein	7.00421e-10	unclonable	\N
Anaerocellum thermophilum DSM 6725	521460	NC_012034	Athe_0351	hypothetical protein	4.3926e-10	unclonable	\N
Anaerocellum thermophilum DSM 6725	521460	NC_012034	Athe_0352	hypothetical protein	5.2743e-10	unclonable	\N
Anaerocellum thermophilum DSM 6725	521460	NC_012034	Athe_0353	hypothetical protein	6.3307e-10	unclonable	\N
Anaerocellum thermophilum DSM 6725	521460	NC_012034	Athe_0354	hypothetical protein	9.14442e-10	unclonable	\N
Anaerocellum thermophilum DSM 6725	521460	NC_012034	Athe_0355	hypothetical protein	8.58649e-10	unclonable	\N
Anaerocellum thermophilum DSM 6725	521460	NC_012034	Athe_0356	hypothetical protein	2.72846e-11	unclonable	\N
Anaerocellum thermophilum DSM 6725	521460	NC_012034	Athe_0373	thiamine biosynthesis protein ThiC	3.21341e-09	unclonable	COG0422
Anaerocellum thermophilum DSM 6725	521460	NC_012034	Athe_0374	\N	2.32294e-09	unclonable	COG5421
Anaerocellum thermophilum DSM 6725	521460	NC_012034	Athe_0388	GtrA family protein	6.65591e-11	unclonable	COG2246
Anaerocellum thermophilum DSM 6725	521460	NC_012034	Athe_0389	hypothetical protein	2.44478e-09	unclonable	COG1807
Anaerocellum thermophilum DSM 6725	521460	NC_012034	Athe_0399	extracellular solute-binding protein family 1	1.95685e-09	unclonable	COG1653
Anaerocellum thermophilum DSM 6725	521460	NC_012034	Athe_0400	binding-protein-dependent transport systems inner membrane component	5.06379e-10	unclonable	COG1175
Anaerocellum thermophilum DSM 6725	521460	NC_012034	Athe_0401	binding-protein-dependent transport systems inner membrane component	4.57855e-10	unclonable	COG0395
Anaerocellum thermophilum DSM 6725	521460	NC_012034	Athe_0402	transcriptional regulator, LacI family	1.59796e-09	unclonable	COG1609
Anaerocellum thermophilum DSM 6725	521460	NC_012034	Athe_0463	SsrA-binding protein	1.43287e-09	decreased coverage	COG0691
Anaerocellum thermophilum DSM 6725	521460	NC_012034	Athe_0464	Non-specific serine/threonine protein kinase	8.98251e-05	unclonable	COG0553
Anaerocellum thermophilum DSM 6725	521460	NC_012034	Athe_0470	hypothetical protein	4.50661e-09	decreased coverage	\N
Anaerocellum thermophilum DSM 6725	521460	NC_012034	Athe_0471	hypothetical protein	8.37687e-10	decreased coverage	\N
Anaerocellum thermophilum DSM 6725	521460	NC_012034	Athe_0472	protein of unknown function DUF541	4.43999e-10	unclonable	COG2859
Anaerocellum thermophilum DSM 6725	521460	NC_012034	Athe_0481	hypothetical protein	8.59311e-09	unclonable	\N
Anaerocellum thermophilum DSM 6725	521460	NC_012034	Athe_0525	Isocitrate dehydrogenase (NAD(+))	1.87732e-09	unclonable	COG0473
Anaerocellum thermophilum DSM 6725	521460	NC_012034	Athe_0526	transcriptional regulator, GntR family	4.81506e-10	unclonable	COG1802
Anaerocellum thermophilum DSM 6725	521460	NC_012034	Athe_0527	Mur ligase middle domain protein	4.48446e-07	unclonable	COG0771
Anaerocellum thermophilum DSM 6725	521460	NC_012034	Athe_0528	hypothetical protein	6.20149e-11	unclonable	\N
Anaerocellum thermophilum DSM 6725	521460	NC_012034	Athe_0529	hypothetical protein	8.66022e-11	unclonable	\N
Anaerocellum thermophilum DSM 6725	521460	NC_012034	Athe_0535	3D domain protein	4.18011e-08	decreased coverage	COG3583
Anaerocellum thermophilum DSM 6725	521460	NC_012034	Athe_0571	MscS Mechanosensitive ion channel	0.000639441	decreased coverage	COG0668
Anaerocellum thermophilum DSM 6725	521460	NC_012034	Athe_0572	prolyl-tRNA synthetase	0.00211854	decreased coverage	COG0442
Anaerocellum thermophilum DSM 6725	521460	NC_012034	Athe_0590	CrcB protein	3.37717e-08	decreased coverage	COG0239
Anaerocellum thermophilum DSM 6725	521460	NC_012034	Athe_0621	fructose-1,6-bisphosphate aldolase, class II	1.56456e-09	unclonable	COG0191
Anaerocellum thermophilum DSM 6725	521460	NC_012034	Athe_0623	Radical SAM domain protein	6.46743e-09	unclonable	COG0641
Anaerocellum thermophilum DSM 6725	521460	NC_012034	Athe_0624	carbonic anhydrase	1.0495e-10	unclonable	COG0663
Anaerocellum thermophilum DSM 6725	521460	NC_012034	Athe_0625	preprotein translocase subunit SecD	4.18015e-09	unclonable	COG0342
Anaerocellum thermophilum DSM 6725	521460	NC_012034	Athe_0645	oxidoreductase FAD/NAD(P)-binding domain protein	1.0542e-09	unclonable	COG0543
Anaerocellum thermophilum DSM 6725	521460	NC_012034	Athe_0646	hypothetical protein	4.80732e-11	unclonable	\N
Anaerocellum thermophilum DSM 6725	521460	NC_012034	Athe_0647	MazG family protein	5.43691e-10	unclonable	COG3956
Anaerocellum thermophilum DSM 6725	521460	NC_012034	Athe_0648	histone family protein DNA-binding protein	4.17185e-11	unclonable	COG0776
Anaerocellum thermophilum DSM 6725	521460	NC_012034	Athe_0655	threonine synthase	1.23828e-08	unclonable	COG0498
Anaerocellum thermophilum DSM 6725	521460	NC_012034	Athe_0656	MgtE intracellular region	7.6098e-09	unclonable	COG2239
Anaerocellum thermophilum DSM 6725	521460	NC_012034	Athe_0657	natural resistance-associated macrophage protein	6.66945e-09	unclonable	COG1914
Anaerocellum thermophilum DSM 6725	521460	NC_012034	Athe_0664	branched-chain amino acid aminotransferase	0.000154508	decreased coverage	COG0115
Anaerocellum thermophilum DSM 6725	521460	NC_012034	Athe_0682	\N	4.17685e-10	unclonable	COG2452
Anaerocellum thermophilum DSM 6725	521460	NC_012034	Athe_0699	Alcohol dehydrogenase zinc-binding domain protein	6.32921e-05	decreased coverage	COG1063
Anaerocellum thermophilum DSM 6725	521460	NC_012034	Athe_0743	RNA polymerase, sigma 28 subunit, FliA/WhiG subfamily	9.24316e-10	unclonable	COG1191
Anaerocellum thermophilum DSM 6725	521460	NC_012034	Athe_0744	helix-turn-helix domain protein	3.27469e-11	unclonable	\N
Anaerocellum thermophilum DSM 6725	521460	NC_012034	Athe_0782	hypothetical protein	8.14853e-06	decreased coverage	COG3856
Anaerocellum thermophilum DSM 6725	521460	NC_012034	Athe_0783	cell division protein FtsZ	3.21341e-09	unclonable	COG0206
Anaerocellum thermophilum DSM 6725	521460	NC_012034	Athe_0790	diaminopimelate decarboxylase	9.40034e-08	decreased coverage	COG0019
Anaerocellum thermophilum DSM 6725	521460	NC_012034	Athe_0801	threonyl-tRNA synthetase	0.00121365	decreased coverage	COG0441
Anaerocellum thermophilum DSM 6725	521460	NC_012034	Athe_0805	DNA-directed RNA polymerase subunit beta'	9.08086e-05	unclonable	COG0086
Anaerocellum thermophilum DSM 6725	521460	NC_012034	Athe_0806	ribosomal protein L7Ae/L30e/S12e/Gadd45	1.24413e-11	unclonable	COG1358
Anaerocellum thermophilum DSM 6725	521460	NC_012034	Athe_0807	30S ribosomal protein S12	2.5178e-11	unclonable	COG0048
Anaerocellum thermophilum DSM 6725	521460	NC_012034	Athe_0808	30S ribosomal protein S7	4.12886e-11	unclonable	COG0049
Anaerocellum thermophilum DSM 6725	521460	NC_012034	Athe_0809	elongation factor G	9.20124e-08	unclonable	COG0480
Anaerocellum thermophilum DSM 6725	521460	NC_012034	Athe_0821	Aldehyde ferredoxin oxidoreductase	6.02903e-07	decreased coverage	COG2414
Anaerocellum thermophilum DSM 6725	521460	NC_012034	Athe_0822	thiamineS protein	3.95067e-10	decreased coverage	\N
Anaerocellum thermophilum DSM 6725	521460	NC_012034	Athe_0823	UBA/THIF-type NAD/FAD binding protein	2.72432e-09	decreased coverage	COG0476
Anaerocellum thermophilum DSM 6725	521460	NC_012034	Athe_0841	carbohydrate kinase FGGY	1.41344e-08	unclonable	COG1070
Anaerocellum thermophilum DSM 6725	521460	NC_012034	Athe_0859	cobalt transport protein	7.07607e-07	decreased coverage	COG0619
Anaerocellum thermophilum DSM 6725	521460	NC_012034	Athe_0860	ABC transporter related	6.37207e-07	decreased coverage	COG1122
Anaerocellum thermophilum DSM 6725	521460	NC_012034	Athe_0874	pyruvate/ketoisovalerate oxidoreductase, gamma subunit	7.29207e-08	decreased coverage	COG1014
Anaerocellum thermophilum DSM 6725	521460	NC_012034	Athe_0884	amidohydrolase	3.93523e-09	unclonable	COG0402
Anaerocellum thermophilum DSM 6725	521460	NC_012034	Athe_0890	MMPL domain protein	2.50771e-05	unclonable	COG2409
Anaerocellum thermophilum DSM 6725	521460	NC_012034	Athe_0933	glycerol-3-phosphate responsive antiterminator, GlpP	4.87081e-09	decreased coverage	COG1954
Anaerocellum thermophilum DSM 6725	521460	NC_012034	Athe_0934	ATP-dependent protease La	7.6135e-07	unclonable	COG0466
Anaerocellum thermophilum DSM 6725	521460	NC_012034	Athe_0954	hypothetical protein	0.000910199	unclonable	\N
Anaerocellum thermophilum DSM 6725	521460	NC_012034	Athe_0967	signal recognition particle protein	1.09658e-08	unclonable	COG0541
Anaerocellum thermophilum DSM 6725	521460	NC_012034	Athe_0968	30S ribosomal protein S16	5.4377e-11	unclonable	COG0228
Anaerocellum thermophilum DSM 6725	521460	NC_012034	Athe_0969	RNA-binding protein	5.37782e-11	unclonable	COG1837
Anaerocellum thermophilum DSM 6725	521460	NC_012034	Athe_0970	16S rRNA-processing protein RimM	1.5249e-10	unclonable	COG0806
Anaerocellum thermophilum DSM 6725	521460	NC_012034	Athe_0971	\N	4.43999e-10	unclonable	COG0336
Anaerocellum thermophilum DSM 6725	521460	NC_012034	Athe_0983	MiaB-like tRNA modifying enzyme YliG	7.30864e-09	unclonable	COG0621
Anaerocellum thermophilum DSM 6725	521460	NC_012034	Athe_0984	CDP-diacylglycerol/glycerol-3-phosphate 3-phosphatidyltransferase	1.55627e-10	unclonable	COG0558
Anaerocellum thermophilum DSM 6725	521460	NC_012034	Athe_0985	competence/damage-inducible protein CinA	4.22375e-09	unclonable	COG1058
Anaerocellum thermophilum DSM 6725	521460	NC_012034	Athe_1005	major facilitator superfamily MFS_1	7.60178e-08	decreased coverage	\N
Anaerocellum thermophilum DSM 6725	521460	NC_012034	Athe_1048	hypothetical protein	1.20853e-10	unclonable	COG0779
Anaerocellum thermophilum DSM 6725	521460	NC_012034	Athe_1049	NusA antitermination factor	2.59791e-09	unclonable	COG0195
Anaerocellum thermophilum DSM 6725	521460	NC_012034	Athe_1054	tRNA pseudouridine synthase B	1.56302e-08	decreased coverage	COG0130
Anaerocellum thermophilum DSM 6725	521460	NC_012034	Athe_1063	transcription termination factor Rho	3.84674e-08	unclonable	COG1158
Anaerocellum thermophilum DSM 6725	521460	NC_012034	Athe_1121	GTPase ObgE	1.27765e-07	decreased coverage	COG0536
Anaerocellum thermophilum DSM 6725	521460	NC_012034	Athe_1122	hypothetical protein	7.52599e-10	decreased coverage	\N
Anaerocellum thermophilum DSM 6725	521460	NC_012034	Athe_1123	protein of unknown function UPF0044	9.3514e-10	decreased coverage	COG1534
Anaerocellum thermophilum DSM 6725	521460	NC_012034	Athe_1149	hypothetical protein	2.20773e-11	unclonable	\N
Anaerocellum thermophilum DSM 6725	521460	NC_012034	Athe_1157	acyl carrier protein	5.67099e-10	decreased coverage	COG0236
Anaerocellum thermophilum DSM 6725	521460	NC_012034	Athe_1173	hydroxylamine reductase	3.2867e-06	decreased coverage	COG1151
Anaerocellum thermophilum DSM 6725	521460	NC_012034	Athe_1203	hypothetical protein	2.65898e-07	decreased coverage	\N
Anaerocellum thermophilum DSM 6725	521460	NC_012034	Athe_1204	translation initiation factor IF-3	2.44125e-08	decreased coverage	COG0290
Anaerocellum thermophilum DSM 6725	521460	NC_012034	Athe_1205	50S ribosomal protein L35	4.157e-07	decreased coverage	COG0291
Anaerocellum thermophilum DSM 6725	521460	NC_012034	Athe_1235	beta-lactamase domain protein	5.21991e-10	unclonable	COG2333
Anaerocellum thermophilum DSM 6725	521460	NC_012034	Athe_1245	transcriptional regulator, CarD family	6.22315e-08	decreased coverage	COG1329
Anaerocellum thermophilum DSM 6725	521460	NC_012034	Athe_1251	metal dependent phosphohydrolase	6.64219e-08	decreased coverage	COG1713
Anaerocellum thermophilum DSM 6725	521460	NC_012034	Athe_1258	protein of unknown function DUF177	1.35148e-10	unclonable	COG1399
Anaerocellum thermophilum DSM 6725	521460	NC_012034	Athe_1266	pyruvate kinase	1.0731e-06	decreased coverage	COG0469
Anaerocellum thermophilum DSM 6725	521460	NC_012034	Athe_1267	thioesterase superfamily protein	7.90915e-11	unclonable	COG0824
Anaerocellum thermophilum DSM 6725	521460	NC_012034	Athe_1285	UvrD/REP helicase	9.16129e-06	decreased coverage	COG0210
Anaerocellum thermophilum DSM 6725	521460	NC_012034	Athe_1286	acid phosphatase/vanadium-dependent haloperoxidase related	1.22111e-10	unclonable	COG1963
Anaerocellum thermophilum DSM 6725	521460	NC_012034	Athe_1305	septum site-determining protein MinC	1.96227e-10	unclonable	COG0850
Anaerocellum thermophilum DSM 6725	521460	NC_012034	Athe_1306	septum site-determining protein MinD	1.07586e-07	decreased coverage	COG2894
Anaerocellum thermophilum DSM 6725	521460	NC_012034	Athe_1339	pyrroline-5-carboxylate reductase	1.3369e-08	decreased coverage	COG0345
Anaerocellum thermophilum DSM 6725	521460	NC_012034	Athe_1340	Ribonuclease H	1.54889e-09	decreased coverage	COG0328
Anaerocellum thermophilum DSM 6725	521460	NC_012034	Athe_1341	hypothetical protein	1.30295e-09	unclonable	\N
Anaerocellum thermophilum DSM 6725	521460	NC_012034	Athe_1363	transcriptional regulator, TraR/DksA family	2.85999e-08	decreased coverage	COG1734
Anaerocellum thermophilum DSM 6725	521460	NC_012034	Athe_1364	von Willebrand factor type A	0.000145336	unclonable	COG1240
Anaerocellum thermophilum DSM 6725	521460	NC_012034	Athe_1391	Peptidoglycan-binding LysM	1.3388e-09	decreased coverage	\N
Anaerocellum thermophilum DSM 6725	521460	NC_012034	Athe_1401	CopG domain protein DNA-binding domain protein	6.17665e-07	decreased coverage	\N
Anaerocellum thermophilum DSM 6725	521460	NC_012034	Athe_1402	glucuronate isomerase	1.12502e-05	decreased coverage	COG1904
Anaerocellum thermophilum DSM 6725	521460	NC_012034	Athe_1407	transcriptional regulator, DeoR family	1.56456e-09	unclonable	COG2390
Anaerocellum thermophilum DSM 6725	521460	NC_012034	Athe_1408	hypothetical protein	2.09932e-11	unclonable	\N
Anaerocellum thermophilum DSM 6725	521460	NC_012034	Athe_1409	pyruvate phosphate dikinase	1.66258e-06	unclonable	COG0574
Anaerocellum thermophilum DSM 6725	521460	NC_012034	Athe_1431	hypothetical protein	0.000121796	decreased coverage	\N
Anaerocellum thermophilum DSM 6725	521460	NC_012034	Athe_1456	two component transcriptional regulator, winged helix family	0.000183373	decreased coverage	COG0745
Anaerocellum thermophilum DSM 6725	521460	NC_012034	Athe_1484	protein of unknown function DUF47	5.48446e-05	decreased coverage	COG1392
Anaerocellum thermophilum DSM 6725	521460	NC_012034	Athe_1485	phosphate transporter	1.64623e-06	decreased coverage	COG0306
Anaerocellum thermophilum DSM 6725	521460	NC_012034	Athe_1495	LexA repressor	2.62911e-10	unclonable	COG1974
Anaerocellum thermophilum DSM 6725	521460	NC_012034	Athe_1527	hypothetical protein	3.27469e-11	unclonable	\N
Anaerocellum thermophilum DSM 6725	521460	NC_012034	Athe_1528	ribosomal protein L7/L12	2.0563e-11	unclonable	COG0222
Anaerocellum thermophilum DSM 6725	521460	NC_012034	Athe_1529	ribosomal protein L10	5.54953e-11	unclonable	COG0244
Anaerocellum thermophilum DSM 6725	521460	NC_012034	Athe_1530	50S ribosomal protein L1	1.27232e-10	unclonable	COG0081
Anaerocellum thermophilum DSM 6725	521460	NC_012034	Athe_1531	50S ribosomal protein L11	3.30995e-11	unclonable	COG0080
Anaerocellum thermophilum DSM 6725	521460	NC_012034	Athe_1532	NusG antitermination factor	5.37782e-11	unclonable	COG0250
Anaerocellum thermophilum DSM 6725	521460	NC_012034	Athe_1533	preprotein translocase, SecE subunit	2.34675e-11	unclonable	COG0690
Anaerocellum thermophilum DSM 6725	521460	NC_012034	Athe_1553	heat-inducible transcription repressor HrcA	1.53808e-05	decreased coverage	COG1420
Anaerocellum thermophilum DSM 6725	521460	NC_012034	Athe_1554	oxygen-independent coproporphyrinogen III oxidase	7.69723e-05	decreased coverage	COG0635
Anaerocellum thermophilum DSM 6725	521460	NC_012034	Athe_1576	hypothetical protein	4.69738e-07	decreased coverage	COG0845
Anaerocellum thermophilum DSM 6725	521460	NC_012034	Athe_1600	protein of unknown function DUF1156	9.70911e-06	unclonable	COG1743
Anaerocellum thermophilum DSM 6725	521460	NC_012034	Athe_1618	DNA ligase, NAD-dependent	1.64842e-06	decreased coverage	COG0272
Anaerocellum thermophilum DSM 6725	521460	NC_012034	Athe_1627	transcriptional regulator, AraC family	1.16038e-06	decreased coverage	COG2207
Anaerocellum thermophilum DSM 6725	521460	NC_012034	Athe_1628	protein of unknown function DUF6 transmembrane	2.13352e-07	decreased coverage	COG2510
Anaerocellum thermophilum DSM 6725	521460	NC_012034	Athe_1641	signal peptidase I	3.47267e-08	decreased coverage	COG0681
Anaerocellum thermophilum DSM 6725	521460	NC_012034	Athe_1642	MutS2 family protein	5.90377e-05	decreased coverage	COG1193
Anaerocellum thermophilum DSM 6725	521460	NC_012034	Athe_1659	hypothetical protein	8.77289e-10	unclonable	\N
Anaerocellum thermophilum DSM 6725	521460	NC_012034	Athe_1708	pyruvate flavodoxin/ferredoxin oxidoreductase domain protein	0.00336009	decreased coverage	COG0674
Anaerocellum thermophilum DSM 6725	521460	NC_012034	Athe_1726	preprotein translocase, SecY subunit	7.16119e-09	unclonable	COG0201
Anaerocellum thermophilum DSM 6725	521460	NC_012034	Athe_1727	50S ribosomal protein L15	7.74697e-11	unclonable	COG0200
Anaerocellum thermophilum DSM 6725	521460	NC_012034	Athe_1728	30S ribosomal protein S5	1.23427e-10	unclonable	COG0098
Anaerocellum thermophilum DSM 6725	521460	NC_012034	Athe_1729	50S ribosomal protein L18	5.00708e-11	unclonable	COG0256
Anaerocellum thermophilum DSM 6725	521460	NC_012034	Athe_1730	50S ribosomal protein L6	6.72522e-11	unclonable	COG0097
Anaerocellum thermophilum DSM 6725	521460	NC_012034	Athe_1731	30S ribosomal protein S8	3.37802e-11	unclonable	COG0096
Anaerocellum thermophilum DSM 6725	521460	NC_012034	Athe_1732	30S ribosomal protein S14	1.29581e-11	unclonable	COG0199
Anaerocellum thermophilum DSM 6725	521460	NC_012034	Athe_1733	ribosomal protein L5	7.36649e-11	unclonable	COG0094
Anaerocellum thermophilum DSM 6725	521460	NC_012034	Athe_1734	50S ribosomal protein L24	2.98754e-11	unclonable	COG0198
Anaerocellum thermophilum DSM 6725	521460	NC_012034	Athe_1735	50S ribosomal protein L14	2.98754e-11	unclonable	COG0093
Anaerocellum thermophilum DSM 6725	521460	NC_012034	Athe_1736	30S ribosomal protein S17	2.0777e-11	unclonable	COG0186
Anaerocellum thermophilum DSM 6725	521460	NC_012034	Athe_1737	50S ribosomal protein L29	1.40424e-11	unclonable	COG0255
Anaerocellum thermophilum DSM 6725	521460	NC_012034	Athe_1738	50S ribosomal protein L16	5.21329e-11	unclonable	COG0197
Anaerocellum thermophilum DSM 6725	521460	NC_012034	Athe_1761	2-alkenal reductase	3.80843e-07	decreased coverage	COG0265
Anaerocellum thermophilum DSM 6725	521460	NC_012034	Athe_1780	inner-membrane translocator	2.59791e-09	unclonable	COG4603
Anaerocellum thermophilum DSM 6725	521460	NC_012034	Athe_1801	cell division ATP-binding protein FtsE	2.1053e-08	decreased coverage	COG2884
Anaerocellum thermophilum DSM 6725	521460	NC_012034	Athe_1802	transcriptional regulator, CdaR	7.01672e-09	unclonable	COG3835
Anaerocellum thermophilum DSM 6725	521460	NC_012034	Athe_1814	uridylate kinase	4.87081e-09	decreased coverage	COG0528
Anaerocellum thermophilum DSM 6725	521460	NC_012034	Athe_1828	transcriptional repressor, CtsR	5.26756e-11	unclonable	COG4463
Anaerocellum thermophilum DSM 6725	521460	NC_012034	Athe_1829	polysaccharide deacetylase	4.3926e-10	unclonable	COG0726
Anaerocellum thermophilum DSM 6725	521460	NC_012034	Athe_1830	hypothetical protein	3.24096e-11	unclonable	\N
Anaerocellum thermophilum DSM 6725	521460	NC_012034	Athe_1857	glycoside hydrolase family 48	0.00499056	unclonable	COG3693
Anaerocellum thermophilum DSM 6725	521460	NC_012034	Athe_1864	glycosyl transferase family 39	4.0084e-08	unclonable	COG1928
Anaerocellum thermophilum DSM 6725	521460	NC_012034	Athe_1884	type II secretion system protein E	6.26903e-07	decreased coverage	COG2804
Anaerocellum thermophilum DSM 6725	521460	NC_012034	Athe_1896	periplasmic binding protein	7.91854e-09	decreased coverage	COG0614
Anaerocellum thermophilum DSM 6725	521460	NC_012034	Athe_1897	glycine cleavage H-protein	2.81988e-06	decreased coverage	COG0509
Anaerocellum thermophilum DSM 6725	521460	NC_012034	Athe_1917	binding-protein-dependent transport systems inner membrane component	7.94188e-07	decreased coverage	COG0601
Anaerocellum thermophilum DSM 6725	521460	NC_012034	Athe_1925	hypothetical protein	1.01879e-08	decreased coverage	\N
Anaerocellum thermophilum DSM 6725	521460	NC_012034	Athe_1926	Radical SAM domain protein	5.17647e-09	unclonable	COG4277
Anaerocellum thermophilum DSM 6725	521460	NC_012034	Athe_1942	extracellular solute-binding protein family 3	2.37139e-05	decreased coverage	COG0834
Anaerocellum thermophilum DSM 6725	521460	NC_012034	Athe_1951	(p)ppGpp synthetase I, SpoT/RelA	5.67155e-07	unclonable	COG0317
Anaerocellum thermophilum DSM 6725	521460	NC_012034	Athe_1960	homoserine kinase	1.60344e-06	decreased coverage	COG0083
Anaerocellum thermophilum DSM 6725	521460	NC_012034	Athe_1985	DNA binding domain protein, excisionase family	3.0807e-11	unclonable	\N
Anaerocellum thermophilum DSM 6725	521460	NC_012034	Athe_2044	FAD-dependent thymidylate synthase	3.90103e-06	decreased coverage	COG1351
Anaerocellum thermophilum DSM 6725	521460	NC_012034	Athe_2045	primosome, DnaD subunit	9.03409e-06	decreased coverage	COG3935
Anaerocellum thermophilum DSM 6725	521460	NC_012034	Athe_2046	DNA replication protein DnaC	8.31596e-06	decreased coverage	COG1484
Anaerocellum thermophilum DSM 6725	521460	NC_012034	Athe_2047	(3R)-hydroxymyristoyl-ACP dehydratase	9.07097e-07	decreased coverage	COG0764
Anaerocellum thermophilum DSM 6725	521460	NC_012034	Athe_2062	glycosyl transferase, WecB/TagA/CpsF family	4.6039e-05	decreased coverage	COG1922
Anaerocellum thermophilum DSM 6725	521460	NC_012034	Athe_2069	30S ribosomal protein S9	8.31765e-11	unclonable	COG0103
Anaerocellum thermophilum DSM 6725	521460	NC_012034	Athe_2070	50S ribosomal protein L13	7.21803e-11	unclonable	COG0102
Anaerocellum thermophilum DSM 6725	521460	NC_012034	Athe_2086	Beta-glucuronidase	0.000473091	decreased coverage	COG3250
Anaerocellum thermophilum DSM 6725	521460	NC_012034	Athe_2093	binding-protein-dependent transport systems inner membrane component	8.58649e-10	unclonable	COG4209
Anaerocellum thermophilum DSM 6725	521460	NC_012034	Athe_2094	glycoside hydrolase family 2 sugar binding	1.80475e-06	unclonable	\N
Anaerocellum thermophilum DSM 6725	521460	NC_012034	Athe_2095	30S ribosomal protein S18	5.37782e-11	unclonable	COG0238
Anaerocellum thermophilum DSM 6725	521460	NC_012034	Athe_2096	single-strand binding protein	1.79273e-10	unclonable	COG0629
Anaerocellum thermophilum DSM 6725	521460	NC_012034	Athe_2097	ribosomal protein S6	7.74697e-11	unclonable	COG0360
Anaerocellum thermophilum DSM 6725	521460	NC_012034	Athe_2098	\N	3.02287e-09	unclonable	COG1453
Anaerocellum thermophilum DSM 6725	521460	NC_012034	Athe_2104	preprotein translocase, SecA subunit	2.51511e-05	decreased coverage	COG0653
Anaerocellum thermophilum DSM 6725	521460	NC_012034	Athe_2122	S-adenosylmethionine decarboxylase proenzyme	4.3873e-11	unclonable	COG1586
Anaerocellum thermophilum DSM 6725	521460	NC_012034	Athe_2123	Cof-like hydrolase	2.04309e-10	unclonable	COG0561
Anaerocellum thermophilum DSM 6725	521460	NC_012034	Athe_2124	hypothetical protein	2.34804e-09	unclonable	COG4198
Anaerocellum thermophilum DSM 6725	521460	NC_012034	Athe_2125	D-3-phosphoglycerate dehydrogenase	1.8587e-08	unclonable	COG0111
Anaerocellum thermophilum DSM 6725	521460	NC_012034	Athe_2144	RNA polymerase, sigma 28 subunit, FliA/WhiG	0.000102302	decreased coverage	COG1191
Anaerocellum thermophilum DSM 6725	521460	NC_012034	Athe_2160	flagellar motor switch protein	0.000995507	decreased coverage	COG1776
Anaerocellum thermophilum DSM 6725	521460	NC_012034	Athe_2180	tRNA (uracil-5-)-methyltransferase Gid	0.00339849	decreased coverage	COG1206
Anaerocellum thermophilum DSM 6725	521460	NC_012034	Athe_2181	DNA topoisomerase I	0.0024842	decreased coverage	COG0550
Anaerocellum thermophilum DSM 6725	521460	NC_012034	Athe_2187	VanZ family protein	9.88027e-11	unclonable	\N
Anaerocellum thermophilum DSM 6725	521460	NC_012034	Athe_2188	hypothetical protein	2.92734e-11	unclonable	\N
Anaerocellum thermophilum DSM 6725	521460	NC_012034	Athe_2189	ferric uptake regulator, Fur family	5.32241e-11	unclonable	COG0735
Anaerocellum thermophilum DSM 6725	521460	NC_012034	Athe_2190	periplasmic solute binding protein	3.21353e-10	unclonable	COG0803
Anaerocellum thermophilum DSM 6725	521460	NC_012034	Athe_2196	GCN5-related N-acetyltransferase	2.83618e-07	decreased coverage	COG0456
Anaerocellum thermophilum DSM 6725	521460	NC_012034	Athe_2211	protein of unknown function DUF1634	2.37451e-06	decreased coverage	\N
Anaerocellum thermophilum DSM 6725	521460	NC_012034	Athe_2229	ribulokinase	0.00201608	decreased coverage	COG1069
Anaerocellum thermophilum DSM 6725	521460	NC_012034	Athe_2253	cysteinyl-tRNA synthetase	1.05277e-08	unclonable	COG0215
Anaerocellum thermophilum DSM 6725	521460	NC_012034	Athe_2254	serine O-acetyltransferase	4.04898e-10	unclonable	COG1045
Anaerocellum thermophilum DSM 6725	521460	NC_012034	Athe_2265	Monosaccharide-transporting ATPase	2.67957e-08	decreased coverage	COG1172
Anaerocellum thermophilum DSM 6725	521460	NC_012034	Athe_2288	tRNA methyltransferase complex GCD14 subunit	0.00198385	decreased coverage	COG2519
Anaerocellum thermophilum DSM 6725	521460	NC_012034	Athe_2310	extracellular solute-binding protein family 1	5.23246e-09	unclonable	COG1653
Anaerocellum thermophilum DSM 6725	521460	NC_012034	Athe_2311	transcriptional regulator, LacI family	1.06518e-09	unclonable	COG1609
Anaerocellum thermophilum DSM 6725	521460	NC_012034	Athe_2339	rod shape-determining protein MreB	0.000198225	decreased coverage	COG1077
Anaerocellum thermophilum DSM 6725	521460	NC_012034	Athe_2340	carboxyl-terminal protease	0.000278022	decreased coverage	COG0793
Anaerocellum thermophilum DSM 6725	521460	NC_012034	Athe_2357	glutamate synthase alpha subunit domain protein	8.00072e-09	decreased coverage	COG0070
Anaerocellum thermophilum DSM 6725	521460	NC_012034	Athe_2358	FAD-dependent pyridine nucleotide-disulphide oxidoreductase	4.91843e-09	unclonable	COG1251
Anaerocellum thermophilum DSM 6725	521460	NC_012034	Athe_2364	sodium/calcium exchanger membrane region	6.67432e-05	decreased coverage	COG0530
Anaerocellum thermophilum DSM 6725	521460	NC_012034	Athe_2365	hypothetical protein	3.5405e-09	decreased coverage	\N
Anaerocellum thermophilum DSM 6725	521460	NC_012034	Athe_2388	D-isomer specific 2-hydroxyacid dehydrogenase NAD-binding	0.00285003	decreased coverage	COG1052
Anaerocellum thermophilum DSM 6725	521460	NC_012034	Athe_2411	hypothetical protein	2.88879e-06	decreased coverage	\N
Anaerocellum thermophilum DSM 6725	521460	NC_012034	Athe_2440	transcriptional repressor, LexA family	2.54374e-09	decreased coverage	COG1974
Anaerocellum thermophilum DSM 6725	521460	NC_012034	Athe_2464	hypothetical protein	1.72399e-07	unclonable	\N
Anaerocellum thermophilum DSM 6725	521460	NC_012034	Athe_2465	hypothetical protein	1.4793e-10	unclonable	COG2405
Anaerocellum thermophilum DSM 6725	521460	NC_012034	Athe_2466	protein of unknown function DUF955	4.13379e-10	unclonable	COG2856
Anaerocellum thermophilum DSM 6725	521460	NC_012034	Athe_2467	transcriptional regulator, XRE family	4.61389e-11	unclonable	\N
Anaerocellum thermophilum DSM 6725	521460	NC_012034	Athe_2475	prophage antirepressor	5.54878e-10	unclonable	COG3617
Anaerocellum thermophilum DSM 6725	521460	NC_012034	Athe_2494	hypothetical protein	4.61389e-11	unclonable	\N
Anaerocellum thermophilum DSM 6725	521460	NC_012034	Athe_2495	hypothetical protein	4.85737e-11	unclonable	\N
Anaerocellum thermophilum DSM 6725	521460	NC_012034	Athe_2496	hypothetical protein	4.66358e-11	unclonable	\N
Anaerocellum thermophilum DSM 6725	521460	NC_012034	Athe_2497	hypothetical protein	6.58733e-11	unclonable	\N
Anaerocellum thermophilum DSM 6725	521460	NC_012034	Athe_2498	hypothetical protein	9.01689e-11	unclonable	\N
Anaerocellum thermophilum DSM 6725	521460	NC_012034	Athe_2499	hypothetical protein	1.08185e-10	unclonable	\N
Anaerocellum thermophilum DSM 6725	521460	NC_012034	Athe_2501	IS605 family transposase OrfB	3.51713e-11	unclonable	\N
Anaerocellum thermophilum DSM 6725	521460	NC_012034	Athe_2502	transcriptional regulator, XRE family	3.18024e-09	unclonable	\N
Anaerocellum thermophilum DSM 6725	521460	NC_012034	Athe_2512	hypothetical protein	1.95532e-11	unclonable	\N
Anaerocellum thermophilum DSM 6725	521460	NC_012034	Athe_2513	hypothetical protein	5.83825e-11	unclonable	\N
Anaerocellum thermophilum DSM 6725	521460	NC_012034	Athe_2514	hypothetical protein	1.93594e-09	unclonable	\N
Anaerocellum thermophilum DSM 6725	521460	NC_012034	Athe_2515	hypothetical protein	3.0807e-11	unclonable	\N
Anaerocellum thermophilum DSM 6725	521460	NC_012034	Athe_2516	hypothetical protein	1.28247e-11	unclonable	\N
Anaerocellum thermophilum DSM 6725	521460	NC_012034	Athe_2517	RNA binding S1 domain protein	2.25878e-10	unclonable	COG0539
Anaerocellum thermophilum DSM 6725	521460	NC_012034	Athe_2544	BioY protein	2.69732e-09	decreased coverage	COG1268
Anaerocellum thermophilum DSM 6725	521460	NC_012034	Athe_2556	transcriptional regulator, LacI family	9.04675e-10	unclonable	COG1609
Anaerocellum thermophilum DSM 6725	521460	NC_012034	Athe_2557	N-acylglucosamine 2-epimerase	3.38325e-09	unclonable	COG2942
Anaerocellum thermophilum DSM 6725	521460	NC_012034	Athe_2567	Hedgehog/intein hint domain protein	0.00023287	decreased coverage	\N
Anaerocellum thermophilum DSM 6725	521460	NC_012034	Athe_2574	extracellular solute-binding protein family 1	6.02333e-09	unclonable	COG2182
Anaerocellum thermophilum DSM 6725	521460	NC_012034	Athe_2575	transcriptional regulator, LacI family	1.66441e-09	unclonable	COG1609
Anaerocellum thermophilum DSM 6725	521460	NC_012034	Athe_2576	alpha-glucan phosphorylase	2.51576e-08	unclonable	COG0058
Anaerocellum thermophilum DSM 6725	521460	NC_012034	Athe_2578	binding-protein-dependent transport systems inner membrane component	7.15095e-10	unclonable	COG1175
Anaerocellum thermophilum DSM 6725	521460	NC_012034	Athe_2588	protein of unknown function DUF214	7.60178e-08	decreased coverage	COG0577
Anaerocellum thermophilum DSM 6725	521460	NC_012034	Athe_2589	histidine kinase	1.69153e-06	decreased coverage	COG0642
Anaerocellum thermophilum DSM 6725	521460	NC_012034	Athe_2602	iron permease FTR1	4.55168e-09	decreased coverage	COG0672
Anaerocellum thermophilum DSM 6725	521460	NC_012034	Athe_2603	regulatory protein, FmdB family	4.06925e-10	decreased coverage	\N
Anaerocellum thermophilum DSM 6725	521460	NC_012034	Athe_2604	hypothetical protein	1.93837e-09	decreased coverage	\N
Anaerocellum thermophilum DSM 6725	521460	NC_012034	Athe_2605	hypothetical protein	1.37841e-09	decreased coverage	\N
Anaerocellum thermophilum DSM 6725	521460	NC_012034	Athe_2606	Thioredoxin-disulfide reductase	2.34008e-08	decreased coverage	COG0492
Anaerocellum thermophilum DSM 6725	521460	NC_012034	Athe_2607	protein of unknown function DUF970	1.53353e-09	decreased coverage	COG3870
Anaerocellum thermophilum DSM 6725	521460	NC_012034	Athe_2633	hypothetical protein	2.75588e-08	unclonable	\N
Anaerocellum thermophilum DSM 6725	521460	NC_012034	Athe_2646	hypothetical protein	1.10411e-10	unclonable	\N
[truncated: 39,822 more rows]
