# Supplementary material for: A vast collection of microbial genes that are toxic to bacteria
Source: HighWire-hosted journal article supplement (doi:10.1101/gr.133850.111), 2012-02-01
Supplement: TableS2.xlsx [file TableS2.xlsx]

## Sheet: Sheet1
Organism	NCBI taxon id	Replicon accession	Locus tag	IMG OID	Gene product	Clonability	COG annotation	Was the gene clonable when expression was silent	Toxicity upon induction of gene expression	Bactericidal
Thiomicrospira crunogena XCL-2	317025	NC_007520	Tcr_0270	637784975	hypothetical protein	unclonable	NA	Yes	Mildly toxic	No
Synechococcus elongatus PCC 7942	1140	NC_007604	Synpcc7942_2459	637800908	hypothetical protein	unclonable	NA	Yes	Mildly toxic	No
Psychrobacter cryohalolentis K5	335284	NC_007969	Pcryo_1172	637973637	hypothetical protein	unclonable	NA	Yes	Mildly toxic	No
Novosphingobium aromaticivorans DSM 12444	279238	NC_007794	Saro_2202	640444957	hypothetical protein	decreased coverage	COG0546	Yes	Mildly toxic	Yes
Nitrosococcus oceani ATCC 19707	323261	NC_007484	Noc_2502	637738981	ammonia monooxygenase	unclonable	NA	Yes	Mildly toxic	No
Nitrosococcus oceani ATCC 19707	323261	NC_007484	Noc_1816	637738299	hemolysin-type calcium-binding region	unclonable	NA	Yes	Mildly toxic	No
Chelativorans sp. BNC1	266779	NC_008254	Meso_2389	638068279	hypothetical protein	decreased coverage	COG3181	Yes	Mildly toxic	No
Burkholderia sp. 383	269483	NC_007511	Bcep18194_B1049	637765898	hypothetical protein	unclonable	NA	Yes	Mildly toxic	No
Burkholderia sp. 383	269483	NC_007510	Bcep18194_A5258	637763557	hypothetical protein	unclonable	NA	Yes	Mildly toxic	No
Chelativorans sp. BNC1	266779	NC_008254	Meso_1203	638067089	hypothetical protein	unclonable	NA	No	NA	NA
Synechococcus elongatus PCC 7942	1140	NC_007604	Synpcc7942_1061	637799483	hypothetical protein	decreased coverage	NA	Yes	Not toxic	No
Shewanella denitrificans OS217	318161	NC_007954	Sden_0282	637954264	hypothetical protein	unclonable	NA	Yes	Not toxic	No
Pseudomonas syringae pv. syringae B728a	205918	NC_007005	Psyr_0840	637651178	pentapeptide repeat-containing protein	unclonable	NA	Yes	Not toxic	No
Polaromonas sp. JS666	296591	NC_007950	Bpro_5371	637944993	hypothetical protein	decreased coverage	NA	Yes	Not toxic	No
Geobacter metallireducens GS-15	269799	NC_007517	Gmet_0341	637777614	hypothetical protein	unclonable	NA	Yes	Not toxic	No
Geobacter metallireducens GS-15	269799	NC_007517	Gmet_1267	637778547	hypothetical protein	unclonable	COG1611	Yes	Not toxic	No
Geobacter metallireducens GS-15	269799	NC_007517	Gmet_2481	637779773	hypothetical protein	unclonable	NA	Yes	Not toxic	No
Burkholderia sp. 383	269483	NC_007511	Bcep18194_B0515	637765363	hypothetical protein	decreased coverage	NA	Yes	Not toxic	No
Burkholderia cenocepacia HI2424	331272	NC_008543	Bcen2424_4928	639696984	hypothetical protein	decreased coverage	NA	Yes	Not toxic	No
Candidatus Koribacter versatilis Ellin345	204669	NC_008009	Acid345_2072	637984087	putative outer membrane protein B, OmpB	unclonable	NA	Yes	Not toxic	No
Sulfurimonas denitrificans DSM 1251	326298	NC_007575	Suden_0945	\N	hypothetical protein	decreased coverage	NA	Yes	Not toxic	No
Thiomicrospira crunogena XCL-2	317025	NC_007520	Tcr_1315	637786047	putative signal peptide protein	decreased coverage	NA	Yes	Toxic	Yes?
Shewanella denitrificans OS217	318161	NC_007954	Sden_2273	637956295	hypothetical protein	unclonable	COG4067	Yes	Toxic	No
Rubrobacter xylanophilus DSM 9941	266117	NC_008148	Rxyl_2700	638037475	hypothetical protein	unclonable	NA	Yes	Toxic	No
Pseudomonas syringae pv. syringae B728a	205918	NC_007005	Psyr_4019	637654377	transcriptional regulator, putative	decreased coverage	NA	Yes	Toxic	Yes
Pseudoalteromonas atlantica T6c	342610	NC_008228	Patl_4115	638057151	hypothetical protein	unclonable	NA	Yes	Toxic	Yes
Pseudoalteromonas atlantica T6c	342610	NC_008228	Patl_1998	638055006	hypothetical protein	unclonable	NA	Yes	Toxic	Yes
Nitrosococcus oceani ATCC 19707	323261	NC_007484	Noc_2503	637738982	ammonia monooxygenase/methane monooxygenase, subunit C	unclonable	NA	Yes	Toxic	No
Nitrobacter winogradskyi Nb-255	323098	NC_007406	Nwi_1793	637713355	hypothetical protein	unclonable	NA	Yes	Toxic	No
Methylobacillus flagellatus KT	265072	NC_007947	Mfla_1718	637938632	hypothetical protein	unclonable	NA	Yes	Toxic	Yes?
Methylobacillus flagellatus KT	265072	NC_007947	Mfla_1284	637938188	hypothetical protein	decreased coverage	COG5412	Yes	Toxic	No
Methylobacillus flagellatus KT	265072	NC_007947	Mfla_2397	637939323	hypothetical protein	unclonable	NA	Yes	Toxic	Yes
Methanosarcina barkeri str. Fusaro	269797	NC_007355	Mbar_A2007	637700885	hypothetical protein	unclonable	NA	Yes	Toxic	No?
Methanosarcina barkeri str. Fusaro	269797	NC_007355	Mbar_A3040	637701882	hypothetical protein	unclonable	NA	Yes	Toxic	No
Methanosarcina barkeri str. Fusaro	269797	NC_007355	Mbar_A1797	637700679	hypothetical protein	unclonable	COG3291	Yes	Toxic	Yes
Chelativorans sp. BNC1	266779	NC_008254	Meso_0120	638066000	hypothetical protein	decreased coverage	NA	Yes	Toxic	No
Geobacter metallireducens GS-15	269799	NC_007517	Gmet_3255	637780542	hypothetical protein	decreased coverage	NA	Yes	Toxic	No
Geobacter metallireducens GS-15	269799	NC_007517	Gmet_3254	637780541	LamB porin family protein, putative	decreased coverage	NA	Yes	Toxic	No
Ehrlichia canis str. Jake	269484	NC_007354	Ecaj_0213	637698158	hypothetical protein	unclonable	NA	Yes	Toxic	No
Ralstonia eutropha JMP134	264198	NC_007347	Reut_A2378	637691784	hypothetical protein	unclonable	NA	Yes	Toxic	No
Sulfurimonas denitrificans DSM 1251	326298	NC_007575	Suden_0946	\N	hypothetical protein	unclonable	NA	Yes	Toxic	Yes
Nitrobacter winogradskyi Nb-255	323098	NC_007406	Nwi_0828	637712379	hypothetical protein	unclonable	NA	Yes	Very toxic	Yes
Shewanella denitrificans OS217	318161	NC_007954	Sden_1266	637955262	hypothetical protein	unclonable	NA	Yes	Very toxic	Yes
Psychrobacter cryohalolentis K5	335284	NC_007969	Pcryo_0017	637972457	HNH endonuclease	unclonable	NA	Yes	Very toxic	Yes
Methylobacillus flagellatus KT	265072	NC_007947	Mfla_2253	637939179	hypothetical protein	unclonable	NA	Yes	Very toxic	Yes
Methylobacillus flagellatus KT	265072	NC_007947	Mfla_2731	637939656	hypothetical protein	unclonable	NA	Yes	Very toxic	Yes
Ehrlichia canis str. Jake	269484	NC_007354	Ecaj_0325	637698267	hypothetical protein	unclonable	COG3814	Yes	Very toxic	Yes
Ehrlichia canis str. Jake	269484	NC_007354	Ecaj_0918	637698867	major outer membrane protein P30- 20;surface antigen	unclonable	NA	Yes	Very toxic	No?
Deinococcus geothermalis DSM 11300	319795	NC_008025	Dgeo_1908	641230936	hypothetical protein	decreased coverage	NA	Yes	Very toxic	Yes
Burkholderia sp. 383	269483	NC_007511	Bcep18194_B0516	637765364	hypothetical protein	unclonable	NA	Yes	Very toxic	Yes
Anaeromyxobacter dehalogenans 2CP-C	290397	NC_007760	Adeh_3621	637865176	hypothetical protein	decreased coverage	NA	Yes	Very toxic	Yes
Candidatus Koribacter versatilis Ellin345	204669	NC_008009	Acid345_2073	637984088	parallel beta-helix repeat-containing protein	unclonable	NA	Yes	Very toxic	Yes
Sulfurimonas denitrificans DSM 1251	326298	NC_007575	Suden_1955	\N	hypothetical protein	decreased coverage	NA	Yes	Very toxic	Yes
Rhodoferax ferrireducens T118	338969	NC_007908	Rfer_1746	637916569	PE-PGRS family protein	unclonable	NA	Yes	Weak toxicity?	No
Dechloromonas aromatica RCB	159087	NC_007298	Daro_3524	637681996	hypothetical protein	unclonable	NA	Yes	Weak toxicity?	No
Candidatus Koribacter versatilis Ellin345	204669	NC_008009	Acid345_1898	637983908	glycosyl hydrolase	unclonable	NA	Yes	Weak toxicity?	No
