# Supplementary material for: A vast collection of microbial genes that are toxic to bacteria
Source: HighWire-hosted journal article supplement (doi:10.1101/gr.133850.111), 2012-02-01
Supplement: TableS3.xlsx [file TableS3.xlsx]

## Sheet: restriction_genes
Organism	NCBI taxon id	Replicon accession	locus tag	Gene product	p-value	Clonability	COG ID
Alicyclobacillus acidocaldarius subsp. acidocaldarius DSM 446	521098	NC_013205	Aaci_0480	type III restriction protein res subunit	9.16808e-06	decreased coverage	COG1061
Alicyclobacillus acidocaldarius subsp. acidocaldarius DSM 446	521098	NC_013205	Aaci_1080	type III restriction protein res subunit	8.86806e-05	decreased coverage	COG1061
Bacillus anthracis str. Sterne	260799	NC_005945	BAS3519	hypothetical protein	1.95013e-11	unclonable	COG3183
Bacillus cereus AH187	405534	NC_011658	BCAH187_A5300	type III restriction enzyme, res subunit family	8.32274e-08	unclonable	COG1061
Bacillus weihenstephanensis KBAB4	315730	NC_010184	BcerKBAB4_0824	HNH endonuclease	0.00962018	decreased coverage	COG1403
Bacillus cereus ATCC 10987	222523	NC_003909	BCE_0369	restriction endonuclease, putative	2.00287e-08	unclonable	\N
Bacillus cereus ATCC 10987	222523	NC_003909	BCE_4604	Type II restriction endonuclease, putative	2.26675e-09	unclonable	\N
Bacillus cereus G9842	405531	NC_011772	BCG9842_B4342	type II restriction endonuclease family protein	0.000331313	decreased coverage	COG1787
Burkholderia phytofirmans PsJN	398527	NC_010679	Bphyt_7298	DNA restriction methylase	8.85633e-07	unclonable	COG4123
Bacillus thuringiensis serovar konkukian str. 97-27	281309	NC_005957	BT9727_0842	type II restriction enzyme HpaII (endonuclease HpaII)	7.90153e-19	unclonable	\N
Burkholderia pseudomallei 1710b	320372	NC_007434	BURPS1710b_3655	Type III restriction-modification enzyme helicase subunit	3.24142e-06	decreased coverage	COG3421
Catenulispora acidiphila DSM 44928	479433	NC_013131	Caci_1412	type III restriction protein res subunit	0.00105152	decreased coverage	COG1061
Catenulispora acidiphila DSM 44928	479433	NC_013131	Caci_6961	ATPase associated with various cellular activities AAA_5	0.00535787	decreased coverage	COG1401
Chloroflexus aggregans DSM 9485	326427	NC_011831	Cagg_3339	type II restriction enzyme, SfiI family	2.81957e-07	unclonable	\N
Campylobacter concisus 13826	360104	NC_009802	CCC13826_0822	polysulfide reductase chain C (sulfur reductase chain C)	0.000697352	decreased coverage	COG1401
Clostridium cellulolyticum H10	394503	NC_011898	Ccel_2866	Restriction endonuclease MspI	1.94297e-08	unclonable	\N
Cytophaga hutchinsonii ATCC 33406	269798	NC_008255	CHU_3352	type I site-specific deoxyribonuclease S subunit	5.13186e-05	decreased coverage	COG0732
Campylobacter jejuni subsp. jejuni 81-176	354242	NC_008787	CJJ81176_0777	type I restriction modification DNA specificity domain-containing protein	0.00318537	decreased coverage	COG0732
Campylobacter lari RM2100	306263	NC_012039	Cla_0344	type I restriction-modification system, R subunit	1.08762e-06	decreased coverage	COG4096
Clostridium perfringens ATCC 13124	195103	NC_008261	CPF_0140	putative type II restriction endonuclease	2.24977e-07	decreased coverage	\N
Clostridium perfringens ATCC 13124	195103	NC_008261	CPF_0361	type III restriction-modification system, Mod subunit	3.61373e-05	unclonable	COG2189
Clostridium perfringens ATCC 13124	195103	NC_008261	CPF_1016	putative type II restriction endonuclease	5.61814e-07	unclonable	COG3066
Chitinophaga pinensis DSM 2588	485918	NC_013132	Cpin_3470	McrBC 5-methylcytosine restriction system component-like protein	0.00801853	decreased coverage	COG4268
Cyanothece sp. PCC 8802	395962	NC_013161	Cyan8802_4247	HNH endonuclease	4.85502e-07	unclonable	COG1403
Delftia acidovorans SPH-1	398578	NC_010002	Daci_3155	HNH endonuclease	1.47515e-11	unclonable	COG3183
Dickeya zeae Ech1591	561229	NC_012912	Dd1591_0925	type I restriction-modification system, M subunit	0.000528021	decreased coverage	COG0286
Desulfovibrio desulfuricans subsp. desulfuricans str. ATCC 27774	525146	NC_011883	Ddes_2242	BamHI-like type II restriction endonuclease	4.89366e-07	unclonable	\N
Dehalococcoides ethenogenes 195	243164	NC_002936	DET1269	HNH endonuclease domain-containing protein	3.09683e-05	decreased coverage	COG1403
Dinoroseobacter shibae DFL 12	398580	NC_009952	Dshi_1687	putative HNH endonuclease	0.00321972	decreased coverage	COG1403
Desulfotomaculum acetoxidans DSM 771	485916	NC_013216	Dtox_1530	restriction endonuclease R.NgoMIII	2.68327e-09	unclonable	\N
Escherichia coli DH1	536056	CP001637	EcDH1_1473	type III restriction protein res subunit	8.7246e-07	decreased coverage	\N
Elusimicrobium minutum Pei191	445932	NC_010644	Emin_0855	HNH endonuclease	1.64704e-10	unclonable	COG1403
Geobacter lovleyi SZ	398767	NC_010814	Glov_1414	restriction modification system DNA specificity domain	0.00014984	decreased coverage	COG0732
Geobacillus sp. WCH70	471223	NC_012793	GWCH70_1406	restriction endonuclease	5.55478e-11	unclonable	COG4127
Geobacillus sp. WCH70	471223	NC_012790	GWCH70_3473	type II restriction endonuclease, putative	2.42117e-08	unclonable	\N
Geobacillus sp. Y412MC61	544556	NC_013412	GYMC61_3573	Restriction endonuclease, type II, AlwI	5.73232e-10	unclonable	\N
Halorhabdus utahensis DSM 12940	519442	NC_013158	Huta_0240	HNH endonuclease	0.00719063	decreased coverage	COG3183
Lactobacillus gasseri ATCC 33323	324831	NC_008530	LGAS_0899	restriction endonuclease S subunit	6.81459e-08	decreased coverage	COG0732
Alteromonas macleodii 'Deep ecotype'	314275	NC_011138	MADE_01815	restriction endonuclease	1.33785e-06	unclonable	COG1403
Methanosarcina barkeri str. Fusaro	269797	NC_007355	Mbar_A1996	Mrr restriction system protein-like	0.00366255	decreased coverage	COG1715
Methanosarcina barkeri str. Fusaro	269797	NC_007355	Mbar_A2210	type II restriction enzyme, methylase subunit	0.000292861	decreased coverage	COG0286
Methanospirillum hungatei JF-1	323259	NC_007796	Mhun_1298	ATPase	0.00022527	decreased coverage	COG1401
Natranaerobius thermophilus JW/NM-WN-LF	457570	NC_010718	Nther_1993	type I restriction enzyme EcoKI subunit R	0.000937848	decreased coverage	COG4096
Nitrobacter winogradskyi Nb-255	323098	NC_007406	Nwi_1253	Type I restriction enzyme EcoAI specificity protein	0.00376854	decreased coverage	COG0732
Pseudomonas aeruginosa UCBPP-PA14	208963	NC_008463	PA14_53670	hypothetical protein	4.3823e-10	decreased coverage	COG3183
Pelobacter carbinolicus DSM 2380	338963	NC_007498	Pcar_0418	restriction endonuclease Sac I	6.29913e-20	unclonable	\N
Pseudomonas mendocina ymp	399739	NC_009439	Pmen_0564	restriction modification system DNA specificity subunit	0.00017151	decreased coverage	COG0732
Prochlorococcus marinus str. MIT 9312	74546	NC_007577	PMT9312_1471	type I restriction modification DNA-like	0.00678808	decreased coverage	\N
Pseudomonas putida GB-1	76869	NC_010322	PputGB1_4746	restriction endonuclease EcoRII	0.00392459	decreased coverage	\N
Pseudomonas putida F1	351746	NC_009512	Pput_3214	HNH endonuclease	2.45895e-11	unclonable	COG3183
Pseudomonas putida F1	351746	NC_009512	Pput_4619	McrBC 5-methylcytosine restriction system component-like protein	0.000187053	decreased coverage	COG4268
Roseiflexus castenholzii DSM 13941	383372	NC_009767	Rcas_2226	putative uncharacterized restriction enzyme	0.000214566	unclonable	\N
Roseiflexus castenholzii DSM 13941	383372	NC_009767	Rcas_2237	restriction endonuclease EcoRV	0.000657606	decreased coverage	\N
Ralstonia eutropha JMP134	264198	NC_007347	Reut_A0008	HNH endonuclease	3.12042e-10	unclonable	COG3183
Rhodopseudomonas palustris BisB5	316057	NC_007958	RPD_1974	hypothetical protein	0.00010435	decreased coverage	COG4268
Rhodobacter sphaeroides ATCC 17025	349102	NC_009429	Rsph17025_3533	Type I restriction-modification system methyltransferase subunit-like protein	0.000840506	decreased coverage	\N
Salmonella enterica subsp. enterica serovar Agona str. SL483	454166	NC_011149	SeAg_B0393	type III restriction-modification system StyLTI enzyme res	0.00360009	decreased coverage	COG3587
Staphylococcus epidermidis RP62A	176279	NC_002976	SERP2471	type I restriction-modification system S subunit	0.0091078	decreased coverage	COG0732
Shewanella sp. MR-4	60480	NC_008321	Shewmr4_3203	hypothetical protein	4.90402e-09	unclonable	COG3183
Shewanella loihica PV-4	323850	NC_009092	Shew_0992	BsuBIPstI restriction endonuclease domain-containing protein	0.00476736	decreased coverage	\N
Spirosoma linguale DSM 74	504472	NC_013730	Slin_4847	putative restriction enzyme	5.21229e-05	decreased coverage	\N
Shewanella oneidensis MR-1	211586	NC_004349	SO_A0003	type II restriction endonuclease, putative	6.52415e-06	unclonable	\N
Streptococcus thermophilus LMD-9	322159	NC_008532	STER_1331	type II restriction-modification system modification subunit	7.10469e-05	decreased coverage	\N
Thermofilum pendens Hrk 5	368408	NC_008698	Tpen_0652	type III restriction enzyme, res subunit	7.32435e-07	unclonable	COG1061
