# Supplementary material for: A vast collection of microbial genes that are toxic to bacteria
Source: HighWire-hosted journal article supplement (doi:10.1101/gr.133850.111), 2012-02-01
Supplement: TableS4.xlsx [file TableS4.xlsx]

## Sheet: Table_S5_Unclonable_Intergenic_
Organism	Organism classification	Refseq Accession	Uncloned intergenic region start	Uncloned intergenic region end	Number of clones covering intergenic region	Number of clones covering upstream gene	Number of clones covering downstream gene	Product of upstream gene	Product of downstream gene	Predicted conserved ORF coordinates	Predicted transcript (Promoter and Terminator)	Predicted transcript type	Predicted ncRNA cluster ID	Ribosomal RNA promoter
Ralstonia solanacearum GMI1000	Bacteria; Proteobacteria; Betaproteobacteria	NC_003295	526742	527430	0	5	4	hypothetical protein	50S ribosomal protein L13		TRANSCRIPT_527074-527187+;	ncRNA:114 bp;	cluster:1,size:7;	-
Burkholderia pseudomallei 1710b	Bacteria; Proteobacteria; Betaproteobacteria	NC_007434	3739852	3740478	0	1	1	50S ribosomal protein L13	OsmC/Ohr family protein		TRANSCRIPT_3740106-3740197-;	ncRNA:92 bp;	cluster:1,size:7;	-
Burkholderia ambifaria AMMD	Bacteria; Proteobacteria; Betaproteobacteria	NC_008390	645531	646007	0	3	2	OsmC family protein	hypothetical protein		TRANSCRIPT_645857-645948+;	ncRNA:92 bp;	cluster:1,size:7;	-
Burkholderia pseudomallei 1106a	Bacteria; Proteobacteria; Betaproteobacteria	NC_009076	3330595	3331221	0	2	3	50S ribosomal protein L13	OsmC/Ohr family protein		TRANSCRIPT_3330849-3330940-;	ncRNA:92 bp;	cluster:1,size:7;	-
Burkholderia ambifaria MC40-6	Bacteria; Proteobacteria; Betaproteobacteria	NC_010551	676297	676773	0	1	2	OsmC family protein	hypothetical protein		TRANSCRIPT_676623-676714+;	ncRNA:92 bp;	cluster:1,size:7;	-
Burkholderia phymatum STM815	Bacteria; Proteobacteria; Betaproteobacteria	NC_010622	2885118	2885660	0	1	1	50S ribosomal protein L13	OsmC family protein		TRANSCRIPT_2885239-2885328-;	ncRNA:90 bp;	cluster:1,size:7;	-
Ralstonia pickettii 12J	Bacteria; Proteobacteria; Betaproteobacteria	NC_010682	391018	391717	0	6	3	OsmC family protein	50S ribosomal protein L13		TRANSCRIPT_391353-391464+;	ncRNA:112 bp;	cluster:1,size:7;	-
Burkholderia xenovorans LB400	Bacteria; Proteobacteria; Betaproteobacteria	NC_007951	4570410	4570680	0	1	3	OmpW family outer membrane porin	amino acid efflux pump, RhtB family protein		TRANSCRIPT_4570493-4570553-;	ncRNA:61 bp;	cluster:2,size:6;	-
Burkholderia cenocepacia AU 1054	Bacteria; Proteobacteria; Betaproteobacteria	NC_008060	3074557	3074740	0	1	3	OmpW	LysR family transcriptional regulator		TRANSCRIPT_3074604-3074662-;	ncRNA:59 bp;	cluster:2,size:6;	-
Burkholderia cenocepacia HI2424	Bacteria; Proteobacteria; Betaproteobacteria	NC_008542	351907	352091	0	3	2	LysR family transcriptional regulator	OmpW family protein		TRANSCRIPT_351985-352044+;	ncRNA:60 bp;	cluster:2,size:6;	-
Burkholderia cenocepacia MC0-3	Bacteria; Proteobacteria; Betaproteobacteria	NC_010508	319856	320040	0	4	2	LysR family transcriptional regulator	OmpW family protein		TRANSCRIPT_319934-319993+;	ncRNA:60 bp;	cluster:2,size:6;	-
Burkholderia ambifaria MC40-6	Bacteria; Proteobacteria; Betaproteobacteria	NC_010551	273091	273295	0	3	1	LysR family transcriptional regulator	OmpW family protein		TRANSCRIPT_273177-273236+;	ncRNA:60 bp;	cluster:2,size:6;	-
Burkholderia phytofirmans PsJN	Bacteria; Proteobacteria; Betaproteobacteria	NC_010681	4130803	4131073	0	1	4	OmpW family protein	Lysine exporter protein (LYSE/YGGA)		TRANSCRIPT_4130885-4130984-;	ncRNA:100 bp;	cluster:2,size:6;	-
Burkholderia thailandensis E264	Bacteria; Proteobacteria; Betaproteobacteria	NC_007651	89180	89581	0	2	1	glyoxalase family protein	ADA regulatory protein		TRANSCRIPT_89266-89343-;	ncRNA:78 bp;	cluster:3,size:11;	-
Burkholderia xenovorans LB400	Bacteria; Proteobacteria; Betaproteobacteria	NC_007951	4875287	4875693	0	3	1	AraC family transcriptional regulator	putative lactoylglutathione lyase		TRANSCRIPT_4875500-4875595+;	ncRNA:96 bp;	cluster:3,size:11;	-
Burkholderia cenocepacia AU 1054	Bacteria; Proteobacteria; Betaproteobacteria	NC_008060	2791420	2791850	0	3	1	AraC family transcriptional regulator	glyoxalase/bleomycin resistance protein/dioxygenase		TRANSCRIPT_2791669-2791762+;	ncRNA:94 bp;	cluster:3,size:11;	-
Burkholderia ambifaria AMMD	Bacteria; Proteobacteria; Betaproteobacteria	NC_008390	3545805	3546161	0	4	3	AraC family transcriptional regulator	glyoxalase/bleomycin resistance protein/dioxygenase		TRANSCRIPT_3546030-3546096+;	ncRNA:67 bp;	cluster:3,size:11;	-
Burkholderia mallei SAVP1	Bacteria; Proteobacteria; Betaproteobacteria	NC_008785	2817648	2818048	0	1	2	ADA regulatory protein	glyoxalase family protein		TRANSCRIPT_2817874-2817963+;	ncRNA:90 bp;	cluster:3,size:11;	-
Burkholderia mallei NCTC 10229	Bacteria; Proteobacteria; Betaproteobacteria	NC_008836	2277065	2277465	0	1	5	glyoxalase family protein	ADA regulatory protein		TRANSCRIPT_2277150-2277239-;	ncRNA:90 bp;	cluster:3,size:11;	-
Burkholderia mallei NCTC 10247	Bacteria; Proteobacteria; Betaproteobacteria	NC_009080	2266732	2267132	0	1	3	glyoxalase family protein	regulatory protein ada (regulatory protein of adaptative response)		TRANSCRIPT_2266817-2266906-;	ncRNA:90 bp;	cluster:3,size:11;	-
Burkholderia mallei NCTC 10247	Bacteria; Proteobacteria; Betaproteobacteria	NC_009080	2285259	2285659	0	1	1	glyoxalase family protein	ADA regulatory protein		TRANSCRIPT_2285344-2285433-;	ncRNA:90 bp;	cluster:3,size:11;	-
Burkholderia cenocepacia MC0-3	Bacteria; Proteobacteria; Betaproteobacteria	NC_010508	3522257	3522686	0	3	3	AraC family transcriptional regulator	glyoxalase/bleomycin resistance protein/dioxygenase		TRANSCRIPT_3522505-3522598+;	ncRNA:94 bp;	cluster:3,size:11;	-
Burkholderia ambifaria MC40-6	Bacteria; Proteobacteria; Betaproteobacteria	NC_010551	3433056	3433480	0	3	1	AraC family transcriptional regulator	glyoxalase/bleomycin resistance protein/dioxygenase		TRANSCRIPT_3433332-3433398+;	ncRNA:67 bp;	cluster:3,size:11;	-
Burkholderia phymatum STM815	Bacteria; Proteobacteria; Betaproteobacteria	NC_010622	3468222	3468599	0	2	2	AraC family transcriptional regulator	glyoxalase/bleomycin resistance protein/dioxygenase		TRANSCRIPT_3468430-3468511+;	ncRNA:82 bp;	cluster:3,size:11;	-
Burkholderia cenocepacia HI2424	Bacteria; Proteobacteria; Betaproteobacteria	NC_008543	1713431	1713635	0	2	3	hypothetical protein	hypothetical protein		TRANSCRIPT_1713535-1713591+;	ncRNA:57 bp;	cluster:4,size:4;	-
Burkholderia multivorans ATCC 17616	Bacteria; Proteobacteria; Betaproteobacteria	NC_010086	942389	942592	0	4	3	amidohydrolase	hypothetical protein		TRANSCRIPT_942451-942506-;	ncRNA:56 bp;	cluster:4,size:4;	-
Burkholderia cenocepacia MC0-3	Bacteria; Proteobacteria; Betaproteobacteria	NC_010515	2716647	2716851	0	1	1	hypothetical protein	hypothetical protein		TRANSCRIPT_2716691-2716747-;	ncRNA:57 bp;	cluster:4,size:4;	-
Burkholderia ambifaria MC40-6	Bacteria; Proteobacteria; Betaproteobacteria	NC_010552	1691364	1691725	0	1	1	hypothetical protein	pseudogene		TRANSCRIPT_1691573-1691628+;	ncRNA:56 bp;	cluster:4,size:4;	-
Pseudomonas putida KT2440	Bacteria; Proteobacteria; Gammaproteobacteria	NC_002947	4595082	4595529	0	2	2	hypothetical protein	hypothetical protein		TRANSCRIPT_4595237-4595349+;	ncRNA:113 bp;	cluster:5,size:13;	-
Pseudomonas putida KT2440	Bacteria; Proteobacteria; Gammaproteobacteria	NC_002947	5325365	5325544	0	2	5	hypothetical protein	hypothetical protein		TRANSCRIPT_5325416-5325526+;	ncRNA:111 bp;	cluster:5,size:13;	-
Pseudomonas fluorescens Pf0-1	Bacteria; Proteobacteria; Gammaproteobacteria	NC_007492	4145056	4145534	0	3	5	hypothetical protein	peptidase M14, carboxypeptidase A		TRANSCRIPT_4145103-4145318-;TRANSCRIPT_4145145-4145258+;	ncRNA:216 bp;ncRNA:114 bp;	-1;cluster:5,size:13;	-
Pseudomonas aeruginosa UCBPP-PA14	Bacteria; Proteobacteria; Gammaproteobacteria	NC_008463	5555839	5556301	0	2	4	hypothetical protein	hypothetical protein		TRANSCRIPT_5555926-5556042+;TRANSCRIPT_5556138-5556251+;	ncRNA:117 bp;ncRNA:114 bp;	cluster:5,size:13;cluster:5,size:13;	-
Pseudomonas mendocina ymp	Bacteria; Proteobacteria; Gammaproteobacteria	NC_009439	1126602	1126862	0	3	3	hypothetical protein	cyclic nucleotide-binding protein		TRANSCRIPT_1126631-1126745-;TRANSCRIPT_1126763-1126844+;	ncRNA:115 bp;ncRNA:82 bp;	cluster:5,size:13;-1;	-
Pseudomonas putida F1	Bacteria; Proteobacteria; Gammaproteobacteria	NC_009512	2024221	2024668	0	3	2	sigma-70, region 4 type 2	hypothetical protein		TRANSCRIPT_2024401-2024513-;	ncRNA:113 bp;	cluster:5,size:13;	-
Pseudomonas putida F1	Bacteria; Proteobacteria; Gammaproteobacteria	NC_009512	5089125	5089304	0	5	1	TfoX domain-containing protein	hypothetical protein		TRANSCRIPT_5089173-5089286+;	ncRNA:114 bp;	cluster:5,size:13;	-
Pseudomonas aeruginosa PA7	Bacteria; Proteobacteria; Gammaproteobacteria	NC_009656	5586006	5586451	0	1	1	hypothetical protein	hypothetical protein		TRANSCRIPT_5586091-5586207+;TRANSCRIPT_5586304-5586419+;	ncRNA:117 bp;ncRNA:116 bp;	cluster:5,size:13;cluster:5,size:13;	-
Pseudomonas putida GB-1	Bacteria; Proteobacteria; Gammaproteobacteria	NC_010322	4082109	4082540	0	4	6	hypothetical protein	sigma-70 region 4 type 2		TRANSCRIPT_4082247-4082357+;	ncRNA:111 bp;	cluster:5,size:13;	-
Pseudomonas putida GB-1	Bacteria; Proteobacteria; Gammaproteobacteria	NC_010322	5234008	5234188	0	2	3	TfoX domain-containing protein	hypothetical protein		TRANSCRIPT_5234056-5234169+;	ncRNA:114 bp;	cluster:5,size:13;	-
Pseudomonas putida W619	Bacteria; Proteobacteria; Gammaproteobacteria	NC_010501	826931	827131	0	1	1	hypothetical protein	TfoX domain-containing protein		TRANSCRIPT_826968-827083-;	ncRNA:116 bp;	cluster:5,size:13;	-
Bacillus anthracis str. Sterne	Bacteria; Firmicutes; Bacillales	NC_005945	625977	626812	0	1	6	L-lactate permease	ArsR family transcriptional regulator		TRANSCRIPT_626147-626506-;	ncRNA:360 bp;	cluster:6,size:3;	-
Bacillus cereus E33L	Bacteria; Firmicutes; Bacillales	NC_006274	613569	614403	0	2	3	L-lactate permease	ArsR family transcriptional regulator		TRANSCRIPT_613739-614148-;	ncRNA:410 bp;	cluster:6,size:3;	-
Bacillus anthracis str. 'Ames Ancestor'	Bacteria; Firmicutes; Bacillales	NC_007530	625934	626769	0	1	1	L-lactate permease	ArsR family transcriptional regulator		TRANSCRIPT_626104-626463-;	ncRNA:360 bp;	cluster:6,size:3;	-
Shewanella amazonensis SB2B	Bacteria; Proteobacteria; Gammaproteobacteria	NC_008700	141959	142807	0	1	1	sensor histidine kinase	acetyltransferase		TRANSCRIPT_141971-142072-;TRANSCRIPT_142638-142752-;	ncRNA:102 bp;ncRNA:115 bp;	-1;cluster:7,size:3;	-
Shewanella baltica OS185	Bacteria; Proteobacteria; Gammaproteobacteria	NC_009665	5147384	5147732	0	3	6	GCN5-related N-acetyltransferase	integral membrane sensor signal transduction histidine kinase		TRANSCRIPT_5147481-5147607+;	ncRNA:127 bp;	cluster:7,size:3;	-
Shewanella baltica OS223	Bacteria; Proteobacteria; Gammaproteobacteria	NC_011663	5063052	5063400	0	1	1	acetyltransferase	histidine kinase		TRANSCRIPT_5063149-5063275+;	ncRNA:127 bp;	cluster:7,size:3;	-
Ralstonia solanacearum GMI1000	Bacteria; Proteobacteria; Betaproteobacteria	NC_003295	3651219	3652130	0	2	5	putative outermembrane signal peptide protein	two-component response regulator transcription regulator protein		TRANSCRIPT_3651444-3651497+;TRANSCRIPT_3651562-3651675+;TRANSCRIPT_3651827-3651896+;	ncRNA:54 bp;ncRNA:114 bp;ncRNA:70 bp;	cluster:9,size:3;-1;cluster:8,size:3;	-
Ralstonia pickettii 12J	Bacteria; Proteobacteria; Betaproteobacteria	NC_010682	3764792	3765734	0	3	9	lipoprotein, YaeC family	response regulator receiver modulated diguanylate phosphodiesterase		TRANSCRIPT_3765028-3765086+;TRANSCRIPT_3765429-3765493+;	ncRNA:59 bp;ncRNA:65 bp;	cluster:9,size:3;cluster:8,size:3;	-
Ralstonia pickettii 12D	Bacteria; Proteobacteria; Betaproteobacteria	NC_012856	3454702	3455642	0	2	3	lipoprotein, YaeC family	response regulator receiver modulated diguanylate phosphodiesterase		TRANSCRIPT_3454936-3454994+;TRANSCRIPT_3455337-3455401+;	ncRNA:59 bp;ncRNA:65 bp;	cluster:9,size:3;cluster:8,size:3;	-
Dehalococcoides ethenogenes 195	Bacteria; Chloroflexi; Dehalococcoidetes	NC_002936	1297551	1298040	0	2	1	putative DNA-binding/iron metalloprotein/AP endonuclease	chaperonin GroES		TRANSCRIPT_1297576-1297757-;	ncRNA:182 bp;	cluster:10,size:2;	-
Dehalococcoides sp. VS	Bacteria; Chloroflexi; Dehalococcoidetes	NC_013552	1121639	1122129	0	5	1	metal-dependent protease with chaperone activity	co-chaperonin GroES (HSP10)		TRANSCRIPT_1121666-1121914-;	ncRNA:249 bp;	cluster:10,size:2;	-
Burkholderia mallei SAVP1	Bacteria; Proteobacteria; Betaproteobacteria	NC_008785	585047	585578	0	1	3	cold-shock domain-contain protein	ATP-dependent Clp protease adaptor protein ClpS		TRANSCRIPT_585235-585471+;	ncRNA:237 bp;	cluster:11,size:2;	-
Burkholderia pseudomallei 1106a	Bacteria; Proteobacteria; Betaproteobacteria	NC_009076	943502	944033	0	1	5	cold shock protein	ATP-dependent Clp protease adaptor protein ClpS		TRANSCRIPT_943690-943926+;	ncRNA:237 bp;	cluster:11,size:2;	-
Escherichia coli DH1	Bacteria; Proteobacteria; Gammaproteobacteria	CP001637	2121058	2121367	0	1	2	LPP repeat-containing protein	pyruvate kinase		TRANSCRIPT_2121110-2121337+;	ncRNA:228 bp;	cluster:12,size:2;	-
Shigella boydii CDC 3083-94	Bacteria; Proteobacteria; Gammaproteobacteria	NC_010658	1720085	1720394	0	1	1	pyruvate kinase	major outer membrane lipoprotein		TRANSCRIPT_1720115-1720342-;	ncRNA:228 bp;	cluster:12,size:2;	-
Bacillus cereus AH187	Bacteria; Firmicutes; Bacillales	NC_011658	1305389	1305914	0	1	2	sodium/proline symporter family protein	hypothetical protein		TRANSCRIPT_1305537-1305749-;	ncRNA:213 bp;	cluster:13,size:2;	-
Bacillus cereus G9842	Bacteria; Firmicutes; Bacillales	NC_011772	1192492	1193017	0	2	2	sodium/proline symporter family protein	hypothetical protein		TRANSCRIPT_1192640-1192822-;	ncRNA:183 bp;	cluster:13,size:2;	-
Bacillus anthracis str. Sterne	Bacteria; Firmicutes; Bacillales	NC_005945	106266	106497	0	1	1	50S ribosomal protein L1	50S ribosomal protein L10		TRANSCRIPT_106311-106448+;	ncRNA:138 bp;	cluster:14,size:2;	-
Bacillus weihenstephanensis KBAB4	Bacteria; Firmicutes; Bacillales	NC_010184	111830	112063	0	1	1	50S ribosomal protein L1	50S ribosomal protein L10		TRANSCRIPT_111875-112014+;	ncRNA:140 bp;	cluster:14,size:2;	-
Salmonella enterica subsp. enterica serovar Schwarzengrund str. CVM19633	Bacteria; Proteobacteria; Gammaproteobacteria	NC_011094	1316148	1316522	0	1	3	putative cytoplasmic protein	chorismate mutase		TRANSCRIPT_1316306-1316349-;	ncRNA:44 bp;	cluster:15,size:2;	-
Salmonella enterica subsp. enterica serovar Agona str. SL483	Bacteria; Proteobacteria; Gammaproteobacteria	NC_011149	1863606	1863921	0	4	1	chorismate mutase	putative cytoplasmic protein		TRANSCRIPT_1863779-1863822+;	ncRNA:44 bp;	cluster:15,size:2;	-
Geobacter metallireducens GS-15	Bacteria; Proteobacteria; Deltaproteobacteria	NC_007517	34215	34353	0	4	2	hypothetical protein	co-chaperonin GroES		TRANSCRIPT_34270-34306+;	ncRNA:37 bp;	cluster:16,size:2;	-
Geobacter bemidjiensis Bem	Bacteria; Proteobacteria; Deltaproteobacteria	NC_011146	290989	291146	0	2	2	uncharacterized protein-like protein	chaperonin Cpn10		TRANSCRIPT_291066-291104+;	ncRNA:39 bp;	cluster:16,size:2;	-
Bacillus thuringiensis serovar konkukian str. 97-27	Bacteria; Firmicutes; Bacillales	NC_005957	409633	409837	0	4	1	alpha-glucosidase	protein-N(pi)-phosphohistidine-sugar phosphotransferase (enzyme II of the phosphotransferase system) (PTS system glucose-specific IIBC component)		TRANSCRIPT_409634-409656-;	ncRNA:23 bp;	cluster:17,size:2;	-
Bacillus cereus E33L	Bacteria; Firmicutes; Bacillales	NC_006274	402103	402308	0	1	2	alpha-glucosidase	protein-N(pi)-phosphohistidine-sugar phosphotransferase (enzyme II of the phosphotransferase system) (PTS system glucose-specific IIBC component)		TRANSCRIPT_402104-402126-;	ncRNA:23 bp;	cluster:17,size:2;	-
Geobacter sulfurreducens PCA	Bacteria; Proteobacteria; Deltaproteobacteria	NC_002939	1281319	1281851	0	3	1	queuine tRNA-ribosyltransferase	fumarate reductase, cytochrome b subunit, putative		TRANSCRIPT_1281439-1281617-;	ncRNA:179 bp;	-1;	-
Pseudomonas putida KT2440	Bacteria; Proteobacteria; Gammaproteobacteria	NC_002947	68313	68486	0	2	2	major facilitator family transporter	phospholipid/glycerol acyltransferase		TRANSCRIPT_68327-68405-;	ncRNA:79 bp;	-1;	-
Bacillus cereus ATCC 10987	Bacteria; Firmicutes; Bacillales	NC_003909	492652	492858	0	1	2	glycosyl hydrolase family protein	PTS system, IIBC component		TRANSCRIPT_492653-492802-;	ncRNA:150 bp;	-1;	-
Bacillus cereus ATCC 10987	Bacteria; Firmicutes; Bacillales	NC_003909	700272	701004	0	1	2	L-lactate permease	hypothetical protein		TRANSCRIPT_700448-700776-;	ncRNA:329 bp;	-1;	-
Bacillus cereus ATCC 10987	Bacteria; Firmicutes; Bacillales	NC_003909	4247846	4248300	0	1	2	hypothetical protein	tRNA-Gly		TRANSCRIPT_4247900-4248118-;	ncRNA:219 bp;	-1;	-
Colwellia psychrerythraea 34H	Bacteria; Proteobacteria; Gammaproteobacteria	NC_003910	3685010	3685329	0	1	1	DNA-binding transcriptional activator GcvA	hypothetical protein		TRANSCRIPT_3685167-3685237+;	ncRNA:71 bp;	-1;	-
Bacillus anthracis str. Sterne	Bacteria; Firmicutes; Bacillales	NC_005945	837312	837471	0	4	2	hypothetical protein	hypothetical protein		TRANSCRIPT_837339-837435-;	ncRNA:97 bp;	-1;	-
Bacillus anthracis str. Sterne	Bacteria; Firmicutes; Bacillales	NC_005945	3234217	3234594	0	2	4	hypothetical protein	hypothetical protein		TRANSCRIPT_3234314-3234560+;	ncRNA:247 bp;	-1;	-
Bacillus thuringiensis serovar konkukian str. 97-27	Bacteria; Firmicutes; Bacillales	NC_005957	1396285	1396779	0	2	1	cell wall endopeptidase	proton/sodium-glutamate symport protein		TRANSCRIPT_1396461-1396587+;	ncRNA:127 bp;	-1;	-
Bacillus thuringiensis serovar konkukian str. 97-27	Bacteria; Firmicutes; Bacillales	NC_005957	4962700	4963245	0	1	4	hypothetical protein	sulfatase		TRANSCRIPT_4962810-4962974-;	ncRNA:165 bp;	-1;	-
Bacillus cereus E33L	Bacteria; Firmicutes; Bacillales	NC_006274	3538724	3539548	0	2	7	hypothetical protein	ATP-binding protein		TRANSCRIPT_3538925-3539004-;TRANSCRIPT_3538928-3538952+;TRANSCRIPT_3539142-3539181+;TRANSCRIPT_3539144-3539251-;	ncRNA:80 bp;ncRNA:25 bp;ncRNA:40 bp;ncRNA:108 bp;	-1;-1;-1;-1;	-
Pseudomonas syringae pv. syringae B728a	Bacteria; Proteobacteria; Gammaproteobacteria	NC_007005	4786335	4786692	0	9	1	formyltetrahydrofolate deformylase	transcriptional regulator, putative		TRANSCRIPT_4786358-4786588-;	ncRNA:231 bp;	-1;	-
Dechloromonas aromatica RCB	Bacteria; Proteobacteria; Betaproteobacteria	NC_007298	1206634	1207597	0	9	9	hypothetical protein	hypothetical protein		TRANSCRIPT_1207018-1207051-;TRANSCRIPT_1207232-1207323-;	ncRNA:34 bp;ncRNA:92 bp;	-1;-1;	-
Dechloromonas aromatica RCB	Bacteria; Proteobacteria; Betaproteobacteria	NC_007298	3673895	3674128	0	1	1	OstA-like protein	phasin		TRANSCRIPT_3673931-3674010-;	ncRNA:80 bp;	-1;	-
Nitrosococcus oceani ATCC 19707	Bacteria; Proteobacteria; Gammaproteobacteria	NC_007483	1668	2200	0	1	3	hypothetical protein	HicB		TRANSCRIPT_1710-2085-;	ncRNA:376 bp;	-1;	-
Nitrosococcus oceani ATCC 19707	Bacteria; Proteobacteria; Gammaproteobacteria	NC_007484	1983709	1984271	0	2	3	Integrins alpha chain	hypothetical protein		TRANSCRIPT_1984088-1984126-;TRANSCRIPT_1983809-1984128+;	ncRNA:39 bp;ncRNA:320 bp;	-1;-1;	-
Pseudomonas fluorescens Pf0-1	Bacteria; Proteobacteria; Gammaproteobacteria	NC_007492	2538709	2539655	0	7	1	LuxR family transcriptional regulator	glycolate oxidase iron-sulfur subunit		TRANSCRIPT_2538946-2539018+;TRANSCRIPT_2538983-2539478-;TRANSCRIPT_2539542-2539626+;	ncRNA:73 bp;ncRNA:496 bp;ncRNA:85 bp;	-1;-1;-1;	-
Chlorobium luteolum DSM 273	Bacteria; Chlorobi; Chlorobia	NC_007512	1739524	1740259	0	4	5	cystathionine gamma-synthase	O-acetylhomoserine/O-acetylserine sulfhydrylase		TRANSCRIPT_1739579-1739841-;TRANSCRIPT_1739871-1740134+;	ncRNA:263 bp;ncRNA:264 bp;	-1;-1;	-
Chlorobium chlorochromatii CaD3	Bacteria; Chlorobi; Chlorobia	NC_007514	1613986	1614211	0	1	1	hypothetical protein	hypothetical protein		TRANSCRIPT_1614024-1614111+;	ncRNA:88 bp;	-1;	-
Geobacter metallireducens GS-15	Bacteria; Proteobacteria; Deltaproteobacteria	NC_007517	3316772	3316946	0	3	2	cytochrome B561	cytochrome c family protein		TRANSCRIPT_3316792-3316848-;	ncRNA:57 bp;	-1;	-
Nitrosospira multiformis ATCC 25196	Bacteria; Proteobacteria; Betaproteobacteria	NC_007614	800861	801291	0	1	1	TetR family transcriptional regulator	BadM/Rrf2 family transcriptional regulator		TRANSCRIPT_800928-801120+;	ncRNA:193 bp;	-1;	-
Nitrosospira multiformis ATCC 25196	Bacteria; Proteobacteria; Betaproteobacteria	NC_007614	2552432	2552711	0	1	4	cold-shock DNA-binding domain-containing protein	ATP-dependent Clp protease adaptor protein ClpS		TRANSCRIPT_2552449-2552539-;	ncRNA:91 bp;	-1;	-
Moorella thermoacetica ATCC 39073	Bacteria; Firmicutes; Clostridia	NC_007644	1768484	1769933	0	3	10	thiamine biosynthesis protein ThiC	transposase		TRANSCRIPT_1768654-1768907-;	ncRNA:254 bp;	-1;	-
Rhodoferax ferrireducens T118	Bacteria; Proteobacteria; Betaproteobacteria	NC_007908	1216476	1217395	0	1	3	co-chaperonin GroES	sodium/calcium exchanger membrane protein		TRANSCRIPT_1216512-1216598-;	ncRNA:87 bp;	-1;	-
Shewanella denitrificans OS217	Bacteria; Proteobacteria; Gammaproteobacteria	NC_007954	1166141	1166286	0	1	1	polynucleotide phosphorylase/polyadenylase	lipoprotein NlpI		TRANSCRIPT_1166157-1166240-;	ncRNA:84 bp;	-1;	-
Shewanella denitrificans OS217	Bacteria; Proteobacteria; Gammaproteobacteria	NC_007954	2870792	2871364	0	4	1	phosphate acetyltransferase	hypothetical protein		TRANSCRIPT_2870862-2871181-;TRANSCRIPT_2870853-2870890+;	ncRNA:320 bp;ncRNA:38 bp;	-1;-1;	-
Chromohalobacter salexigens DSM 3043	Bacteria; Proteobacteria; Gammaproteobacteria	NC_007963	1878615	1879192	0	5	1	Na+/H+ antiporter NhaC	H-NS family protein MvaT		TRANSCRIPT_1878879-1879099-;	ncRNA:221 bp;	-1;	-
Chromohalobacter salexigens DSM 3043	Bacteria; Proteobacteria; Gammaproteobacteria	NC_007963	3501464	3501801	0	2	4	D-isomer specific 2-hydroxyacid dehydrogenase, NAD-binding	hypothetical protein		TRANSCRIPT_3501543-3501659+;	ncRNA:117 bp;	-1;	-
Pseudoalteromonas atlantica T6c	Bacteria; Proteobacteria; Gammaproteobacteria	NC_008228	3043972	3044462	0	2	2	hypothetical protein	hypothetical protein		TRANSCRIPT_3044175-3044419-;	ncRNA:245 bp;	-1;	-
Pseudoalteromonas atlantica T6c	Bacteria; Proteobacteria; Gammaproteobacteria	NC_008228	3565728	3566330	0	1	1	4-hydroxybenzoyl-CoA thioesterase	Holliday junction DNA helicase RuvB		TRANSCRIPT_3566048-3566277+;	ncRNA:230 bp;	-1;	-
Syntrophomonas wolfei subsp. wolfei str. Goettingen	Bacteria; Firmicutes; Clostridia	NC_008346	923664	924174	0	1	1	beta-lactamase-like protein	phospho-2-dehydro-3-deoxyheptonate aldolase		TRANSCRIPT_923980-924038+;	ncRNA:59 bp;	-1;	-
Maricaulis maris MCS10	Bacteria; Proteobacteria; Alphaproteobacteria	NC_008347	1861997	1862445	0	4	1	RND family efflux transporter MFP subunit	calcium-binding EF-hand-containing protein		TRANSCRIPT_1862095-1862385-;	ncRNA:291 bp;	-1;	-
Burkholderia ambifaria AMMD	Bacteria; Proteobacteria; Betaproteobacteria	NC_008390	2827087	2827634	0	4	2	ATP-dependent Clp protease adaptor protein ClpS	cold-shock DNA-binding domain-containing protein		TRANSCRIPT_2827196-2827325-;TRANSCRIPT_2827453-2827499+;	ncRNA:130 bp;ncRNA:47 bp;	-1;-1;	-
Pseudomonas aeruginosa UCBPP-PA14	Bacteria; Proteobacteria; Gammaproteobacteria	NC_008463	4531771	4532539	0	3	13	hypothetical protein	hypothetical protein		TRANSCRIPT_4531900-4531934-;	ncRNA:35 bp;	-1;	-
Pseudomonas aeruginosa UCBPP-PA14	Bacteria; Proteobacteria; Gammaproteobacteria	NC_008463	5355290	5355823	0	2	1	putative deoxycytidine deaminase	hypothetical protein		TRANSCRIPT_5355546-5355695-;	ncRNA:150 bp;	-1;	-
Lactococcus lactis subsp. cremoris SK11	Bacteria; Firmicutes; Lactobacillales	NC_008527	704591	705512	0	1	1	hypothetical protein	ABC-type polysaccharide transport system, permease component		TRANSCRIPT_704853-705356+;TRANSCRIPT_705321-705374-;	ncRNA:504 bp;ncRNA:54 bp;	-1;-1;	-
Lactococcus lactis subsp. cremoris SK11	Bacteria; Firmicutes; Lactobacillales	NC_008527	1426057	1426314	0	1	1	cation transport ATPase	hypothetical protein		TRANSCRIPT_1426082-1426244-;	ncRNA:163 bp;	-1;	-
Leuconostoc mesenteroides subsp. mesenteroides ATCC 8293	Bacteria; Firmicutes; Lactobacillales	NC_008531	67309	67774	0	2	5	ABC-type uncharacterized transport system, periplasmic component	XRE family transcriptional regulator		TRANSCRIPT_67437-67565-;TRANSCRIPT_67661-67683-;	ncRNA:129 bp;ncRNA:23 bp;	-1;-1;	-
Leuconostoc mesenteroides subsp. mesenteroides ATCC 8293	Bacteria; Firmicutes; Lactobacillales	NC_008531	594241	594403	0	2	2	TPR repeat-containing protein	elongation factor Tu		TRANSCRIPT_594281-594346-;	ncRNA:66 bp;	-1;	-
Leuconostoc mesenteroides subsp. mesenteroides ATCC 8293	Bacteria; Firmicutes; Lactobacillales	NC_008531	805271	805566	0	5	2	glutamate synthase subunit beta	Co/Zn/Cd cation transporter		TRANSCRIPT_805403-805461-;	ncRNA:59 bp;	-1;	-
Leuconostoc mesenteroides subsp. mesenteroides ATCC 8293	Bacteria; Firmicutes; Lactobacillales	NC_008531	1464756	1465134	0	5	1	membrane protein, putative toxin regulator	hypothetical protein		TRANSCRIPT_1464818-1465033-;TRANSCRIPT_1464807-1464850+;	ncRNA:216 bp;ncRNA:44 bp;	-1;-1;	-
Leuconostoc mesenteroides subsp. mesenteroides ATCC 8293	Bacteria; Firmicutes; Lactobacillales	NC_008531	1484554	1484691	0	1	1	SSU ribosomal protein S16P	hypothetical protein		TRANSCRIPT_1484617-1484662+;	ncRNA:46 bp;	-1;	-
Leuconostoc mesenteroides subsp. mesenteroides ATCC 8293	Bacteria; Firmicutes; Lactobacillales	NC_008531	1546803	1547323	0	5	5	ABC-type cobalt transport system, membrane component	putative transcription activator		TRANSCRIPT_1546873-1547022-;TRANSCRIPT_1547131-1547293+;	ncRNA:150 bp;ncRNA:163 bp;	-1;-1;	-
Streptococcus thermophilus LMD-9	Bacteria; Firmicutes; Lactobacillales	NC_008532	82642	82955	0	4	2	tRNA-Cys	30S ribosomal protein S2		TRANSCRIPT_82663-82726-;	ncRNA:64 bp;	-1;	-
Streptococcus thermophilus LMD-9	Bacteria; Firmicutes; Lactobacillales	NC_008532	215566	215734	0	1	1	ABC transporter ATP-binding protein	co-chaperonin GroES		TRANSCRIPT_215574-215682-;	ncRNA:109 bp;	-1;	-
Streptococcus thermophilus LMD-9	Bacteria; Firmicutes; Lactobacillales	NC_008532	1397239	1397427	0	3	5	pseudogene	spermidine/putrescine-binding periplasmic protein		TRANSCRIPT_1397296-1397387+;	ncRNA:92 bp;	-1;	-
Streptococcus thermophilus LMD-9	Bacteria; Firmicutes; Lactobacillales	NC_008532	1479634	1480347	0	1	6	ATP-dependent proteinase ATP-binding subunit	hypothetical protein		TRANSCRIPT_1479735-1479930+;TRANSCRIPT_1480005-1480132+;	ncRNA:196 bp;ncRNA:128 bp;	-1;-1;	-
Streptococcus thermophilus LMD-9	Bacteria; Firmicutes; Lactobacillales	NC_008532	1676394	1677295	0	4	1	argininosuccinate synthase	glutamyl-tRNA synthetase		TRANSCRIPT_1676653-1676962-;TRANSCRIPT_1677022-1677139-;	ncRNA:310 bp;ncRNA:118 bp;	-1;-1;	-
Magnetococcus sp. MC-1	Bacteria; Proteobacteria; Magnetococcus.	NC_008576	1167978	1168910	0	2	8	redoxin domain-containing protein	hypothetical protein		TRANSCRIPT_1168014-1168173-;TRANSCRIPT_1168502-1168771-;TRANSCRIPT_1168216-1168545+;	ncRNA:160 bp;ncRNA:270 bp;ncRNA:330 bp;	-1;-1;-1;	-
Magnetococcus sp. MC-1	Bacteria; Proteobacteria; Magnetococcus.	NC_008576	4342750	4343381	0	1	6	autotransporter beta-domain-containing protein	transketolase		TRANSCRIPT_4343026-4343144-;	ncRNA:119 bp;	-1;	-
Magnetococcus sp. MC-1	Bacteria; Proteobacteria; Magnetococcus.	NC_008576	4573943	4574223	0	1	2	tRNA-Val	Lon-A peptidase		TRANSCRIPT_4574048-4574194+;	ncRNA:147 bp;	-1;	-
Shewanella sp. ANA-3	Bacteria; Proteobacteria; Gammaproteobacteria	NC_008577	480754	481357	0	1	2	methylation site containing protein	nicotinate-nucleotide pyrophosphorylase [carboxylating]		TRANSCRIPT_480884-481016-;	ncRNA:133 bp;	-1;	-
Shewanella sp. ANA-3	Bacteria; Proteobacteria; Gammaproteobacteria	NC_008577	2790072	2791093	0	1	1	hypothetical protein	hypothetical protein		TRANSCRIPT_2790670-2790692-;	ncRNA:23 bp;	-1;	-
Pelobacter propionicus DSM 2379	Bacteria; Proteobacteria; Deltaproteobacteria	NC_008609	2690737	2691189	0	1	1	succinate dehydrogenase/fumarate reductase cytochrome b subunit	queuine tRNA-ribosyltransferase		TRANSCRIPT_2690814-2690947-;	ncRNA:134 bp;	-1;	-
Pelobacter propionicus DSM 2379	Bacteria; Proteobacteria; Deltaproteobacteria	NC_008609	3110159	3110715	0	1	1	phosphate binding protein	GreA/GreB family elongation factor		TRANSCRIPT_3110345-3110534+;	ncRNA:190 bp;	-1;	-
Thermofilum pendens Hrk 5	Archaea; Crenarchaeota; Thermoprotei	NC_008698	1249234	1250392	0	1	6	hypothetical protein	paREP6		TRANSCRIPT_1250198-1250255-;	ncRNA:58 bp;	-1;	-
Shewanella amazonensis SB2B	Bacteria; Proteobacteria; Gammaproteobacteria	NC_008700	103757	104677	0	1	1	ribosome biogenesis GTP-binding protein YsxC	DNA-directed DNA polymerase		TRANSCRIPT_103838-103948-;TRANSCRIPT_104013-104117-;	ncRNA:111 bp;ncRNA:105 bp;	-1;-1;	-
Shewanella amazonensis SB2B	Bacteria; Proteobacteria; Gammaproteobacteria	NC_008700	1847971	1848493	0	1	3	hypothetical protein	putative metal dependent phosphohydrolase		TRANSCRIPT_1848182-1848271-;	ncRNA:90 bp;	-1;	-
Shewanella amazonensis SB2B	Bacteria; Proteobacteria; Gammaproteobacteria	NC_008700	3024355	3025210	0	4	2	xanthine/uracil permease family protein	cytosol aminopeptidase, putative		TRANSCRIPT_3024543-3025031-;TRANSCRIPT_3025154-3025188+;	ncRNA:489 bp;ncRNA:35 bp;	-1;-1;	-
Shewanella amazonensis SB2B	Bacteria; Proteobacteria; Gammaproteobacteria	NC_008700	3120262	3120563	0	1	1	putative lipoprotein	tRNA-Phe		TRANSCRIPT_3120280-3120472-;	ncRNA:193 bp;	-1;	-
Psychromonas ingrahamii 37	Bacteria; Proteobacteria; Gammaproteobacteria	NC_008709	2327525	2328156	0	1	2	GCN5-related N-acetyltransferase	hypothetical protein		TRANSCRIPT_2327655-2327817-;TRANSCRIPT_2327751-2327964+;	ncRNA:163 bp;ncRNA:214 bp;	-1;-1;	-
Polaromonas naphthalenivorans CJ2	Bacteria; Proteobacteria; Betaproteobacteria	NC_008781	1411673	1412239	0	2	2	OmpA/MotB domain-containing protein	hypothetical protein		TRANSCRIPT_1411726-1412156-;	ncRNA:431 bp;	-1;	-
Verminephrobacter eiseniae EF01-2	Bacteria; Proteobacteria; Betaproteobacteria	NC_008786	874141	874484	0	2	2	thiamine pyrophosphate protein	thiamine pyrophosphate binding domain-containing protein		TRANSCRIPT_874160-874414-;	ncRNA:255 bp;	-1;	-
Halorhodospira halophila SL1	Bacteria; Proteobacteria; Gammaproteobacteria	NC_008789	2419820	2420176	0	3	3	alpha/beta hydrolase fold	acetoacetyl-CoA reductase		TRANSCRIPT_2419923-2420096-;	ncRNA:174 bp;	-1;	-
Methylibium petroleiphilum PM1	Bacteria; Proteobacteria; Betaproteobacteria	NC_008825	3325421	3325733	0	3	5	hypothetical protein	L-threonine ammonia-lyase		TRANSCRIPT_3325543-3325637+;	ncRNA:95 bp;	-1;	-
Clostridium thermocellum ATCC 27405	Bacteria; Firmicutes; Clostridia	NC_009012	999337	999687	0	1	8	coagulation factor 5/8 type-like protein	IstB-like ATP-binding protein		TRANSCRIPT_999570-999656+;	ncRNA:87 bp;	-1;	-
Clostridium thermocellum ATCC 27405	Bacteria; Firmicutes; Clostridia	NC_009012	2320149	2320418	0	1	1	hypothetical protein	thioredoxin-disulfide reductase		TRANSCRIPT_2320200-2320349-;	ncRNA:150 bp;	-1;	-
Clostridium thermocellum ATCC 27405	Bacteria; Firmicutes; Clostridia	NC_009012	3549147	3549649	0	1	3	GreA/GreB family elongation factor	citrate synthase		TRANSCRIPT_3549197-3549240-;TRANSCRIPT_3549195-3549246+;	ncRNA:44 bp;ncRNA:52 bp;	-1;-1;	-
Burkholderia pseudomallei 1106a	Bacteria; Proteobacteria; Betaproteobacteria	NC_009076	3735230	3735595	0	1	1	hypothetical protein	GDSL-like lipase/acylhydrolase domain-containing protein		TRANSCRIPT_3735341-3735540+;	ncRNA:200 bp;	-1;	-
Shewanella loihica PV-4	Bacteria; Proteobacteria; Gammaproteobacteria	NC_009092	1170431	1171054	0	1	4	citrate transporter	glutamate-1-semialdehyde aminotransferase		TRANSCRIPT_1170779-1171009+;	ncRNA:231 bp;	-1;	-
Desulfotomaculum reducens MI-1	Bacteria; Firmicutes; Clostridia	NC_009253	705578	706010	0	2	1	carbon-monoxide dehydrogenase, catalytic subunit	NifU domain-containing protein		TRANSCRIPT_705588-705918-;	ncRNA:331 bp;	-1;	-
Desulfotomaculum reducens MI-1	Bacteria; Firmicutes; Clostridia	NC_009253	2809509	2810111	0	1	3	XRE family transcriptional regulator	hypothetical protein		TRANSCRIPT_2809612-2809724+;TRANSCRIPT_2809702-2810073-;	ncRNA:113 bp;ncRNA:372 bp;	-1;-1;	-
Shewanella putrefaciens CN-32	Bacteria; Proteobacteria; Gammaproteobacteria	NC_009438	2761650	2762131	0	2	3	phosphate acetyltransferase	hypothetical protein		TRANSCRIPT_2761674-2761833-;TRANSCRIPT_2761746-2761991+;TRANSCRIPT_2761966-2762056-;	ncRNA:160 bp;ncRNA:246 bp;ncRNA:91 bp;	-1;-1;-1;	-
Pseudomonas mendocina ymp	Bacteria; Proteobacteria; Gammaproteobacteria	NC_009439	4532981	4533650	0	6	2	serine hydroxymethyltransferase	hypothetical protein		TRANSCRIPT_4533166-4533205-;	ncRNA:40 bp;	-1;	-
Pseudomonas mendocina ymp	Bacteria; Proteobacteria; Gammaproteobacteria	NC_009439	4669492	4670145	0	7	2	hypothetical protein	resolvase domain-containing protein		TRANSCRIPT_4669705-4669802-;	ncRNA:98 bp;	-1;	-
Geobacter uraniireducens Rf4	Bacteria; Proteobacteria; Deltaproteobacteria	NC_009483	1344260	1344533	0	2	1	peptidase M48, Ste24p	response regulator receiver/ANTAR domain-containing protein		TRANSCRIPT_1344300-1344455-;	ncRNA:156 bp;	-1;	-
Geobacter uraniireducens Rf4	Bacteria; Proteobacteria; Deltaproteobacteria	NC_009483	1420794	1421036	0	1	1	hypothetical protein	hypothetical protein		TRANSCRIPT_1420821-1420953-;	ncRNA:133 bp;	-1;	-
Geobacter uraniireducens Rf4	Bacteria; Proteobacteria; Deltaproteobacteria	NC_009483	2245137	2245534	0	1	1	hypothetical protein	bifunctional aconitate hydratase 2/2-methylisocitrate dehydratase		TRANSCRIPT_2245319-2245357-;	ncRNA:39 bp;	-1;	-
Geobacter uraniireducens Rf4	Bacteria; Proteobacteria; Deltaproteobacteria	NC_009483	2469036	2469482	0	1	2	hypothetical protein	peptidase S10, serine carboxypeptidase		TRANSCRIPT_2469263-2469296-;TRANSCRIPT_2469119-2469297+;	ncRNA:34 bp;ncRNA:179 bp;	-1;-1;	-
Geobacter uraniireducens Rf4	Bacteria; Proteobacteria; Deltaproteobacteria	NC_009483	2562601	2563137	0	1	5	L-lactate transport	pseudogene		TRANSCRIPT_2562749-2563109+;	ncRNA:361 bp;	-1;	-
Geobacter uraniireducens Rf4	Bacteria; Proteobacteria; Deltaproteobacteria	NC_009483	4465228	4465809	0	2	3	hypothetical protein	hypothetical protein		TRANSCRIPT_4465513-4465620+;	ncRNA:108 bp;	-1;	-
Geobacter uraniireducens Rf4	Bacteria; Proteobacteria; Deltaproteobacteria	NC_009483	4665534	4666132	0	1	2	lytic transglycosylase, catalytic	hypothetical protein		TRANSCRIPT_4665890-4666075-;	ncRNA:186 bp;	-1;	-
Staphylococcus aureus subsp. aureus JH9	Bacteria; Firmicutes; Bacillales	NC_009487	617964	618233	0	2	1	50S ribosomal protein L1	50S ribosomal protein L10		TRANSCRIPT_617978-618186-;TRANSCRIPT_618056-618188+;	ncRNA:209 bp;ncRNA:133 bp;	-1;-1;	-
Staphylococcus aureus subsp. aureus JH9	Bacteria; Firmicutes; Bacillales	NC_009487	1208444	1208626	0	1	1	manganese transport protein MntH	hypothetical protein		TRANSCRIPT_1208480-1208511+;TRANSCRIPT_1208550-1208607+;	ncRNA:32 bp;ncRNA:58 bp;	-1;-1;	-
Pseudomonas putida F1	Bacteria; Proteobacteria; Gammaproteobacteria	NC_009512	4513338	4513625	0	3	3	hypothetical protein	peptidylprolyl isomerase, FKBP-type		TRANSCRIPT_4513353-4513588-;	ncRNA:236 bp;	-1;	-
Lactobacillus reuteri DSM 20016	Bacteria; Firmicutes; Lactobacillales	NC_009513	1861316	1861669	0	2	2	hypothetical protein	branched-chain amino acid transport system II carrier protein		TRANSCRIPT_1861365-1861642+;	ncRNA:278 bp;	-1;	-
Psychrobacter sp. PRwf-1	Bacteria; Proteobacteria; Gammaproteobacteria	NC_009524	2174571	2175309	0	3	3	peptidase M23B	hypothetical protein		TRANSCRIPT_2174599-2174746-;	ncRNA:148 bp;	-1;	-
Pseudomonas aeruginosa PA7	Bacteria; Proteobacteria; Gammaproteobacteria	NC_009656	2431624	2432605	0	1	1	hypothetical protein	hypothetical protein		TRANSCRIPT_2432036-2432476-;	ncRNA:441 bp;	-1;	-
Shewanella baltica OS185	Bacteria; Proteobacteria; Gammaproteobacteria	NC_009665	3229464	3229943	0	1	2	phosphate acetyltransferase	hypothetical protein		TRANSCRIPT_3229493-3229703-;TRANSCRIPT_3229536-3229802+;TRANSCRIPT_3229777-3229849-;	ncRNA:211 bp;ncRNA:267 bp;ncRNA:73 bp;	-1;-1;-1;	-
Shewanella baltica OS185	Bacteria; Proteobacteria; Gammaproteobacteria	NC_009665	4014720	4015275	0	5	1	hypothetical protein	hypothetical protein		TRANSCRIPT_4014768-4015227+;	ncRNA:460 bp;	-1;	-
Shewanella baltica OS185	Bacteria; Proteobacteria; Gammaproteobacteria	NC_009665	5185920	5186740	0	1	7	cytochrome c class I	hypothetical protein		TRANSCRIPT_5186296-5186476-;TRANSCRIPT_5186041-5186647+;	ncRNA:181 bp;ncRNA:607 bp;	-1;-1;	-
Ochrobactrum anthropi ATCC 49188	Bacteria; Proteobacteria; Alphaproteobacteria	NC_009667	2811858	2812364	0	1	4	hypothetical protein	1A family penicillin-binding protein		TRANSCRIPT_2812107-2812247-;	ncRNA:141 bp;	-1;	-
Ochrobactrum anthropi ATCC 49188	Bacteria; Proteobacteria; Alphaproteobacteria	NC_009668	1892065	1892417	0	2	4	replication initiation protein RepC	parB-like partition protein		TRANSCRIPT_1892159-1892208+;	ncRNA:50 bp;	-1;	-
Bacillus cytotoxicus NVH 391-98	Bacteria; Firmicutes; Bacillales	NC_009674	2304841	2305655	0	1	1	MgtC/SapB transporter	VanW family protein		TRANSCRIPT_2305054-2305467-;	ncRNA:414 bp;	-1;	-
Yersinia pseudotuberculosis IP 31758	Bacteria; Proteobacteria; Gammaproteobacteria	NC_009708	2703813	2704256	0	3	1	LuxR family DNA-binding response regulator	tRNA-Asn		TRANSCRIPT_2703865-2704128-;	ncRNA:264 bp;	-1;	-
Fervidobacterium nodosum Rt17-B1	Bacteria; Thermotogae; Thermotogales	NC_009718	1636	1975	0	1	1	4Fe-4S ferredoxin iron-sulfur binding domain-containing protein	hypothetical protein		TRANSCRIPT_1677-1898-;	ncRNA:222 bp;	-1;	-
Fervidobacterium nodosum Rt17-B1	Bacteria; Thermotogae; Thermotogales	NC_009718	936206	936651	0	1	1		pseudogene		TRANSCRIPT_936335-936558-;TRANSCRIPT_936265-936378+;	ncRNA:224 bp;ncRNA:114 bp;	-1;-1;	-
Parvibaculum lavamentivorans DS-1	Bacteria; Proteobacteria; Alphaproteobacteria	NC_009719	140517	141575	0	7	5	FAD-dependent pyridine nucleotide-disulphide oxidoreductase	2-keto-4-pentenoate hydratase/2-oxohepta-3-ene-1 7-dioic acid hydratase (catechol pathway)-like protein		TRANSCRIPT_140795-140900-;TRANSCRIPT_141056-141272-;TRANSCRIPT_141317-141357-;	ncRNA:106 bp;ncRNA:217 bp;ncRNA:41 bp;	-1;-1;-1;	-
Coxiella burnetii Dugway 5J108-111	Bacteria; Proteobacteria; Gammaproteobacteria	NC_009727	260085	260622	0	2	4	biotin carboxyl carrier protein of acetyl-CoA carboxylase	pseudogene		TRANSCRIPT_260146-260289-;	ncRNA:144 bp;	-1;	-
Roseiflexus castenholzii DSM 13941	Bacteria; Chloroflexi; Chloroflexales	NC_009767	3856284	3856646	0	1	1	tRNA-Pro	RpoD family RNA polymerase sigma factor		TRANSCRIPT_3856484-3856621+;	ncRNA:138 bp;	-1;	-
Escherichia coli HS	Bacteria; Proteobacteria; Gammaproteobacteria	NC_009800	2063506	2064502	0	2	4	hypothetical protein	hypothetical protein		TRANSCRIPT_2063643-2064034+;TRANSCRIPT_2064267-2064323+;	ncRNA:392 bp;ncRNA:57 bp;	-1;-1;	-
Escherichia coli E24377A	Bacteria; Proteobacteria; Gammaproteobacteria	NC_009801	1924973	1925213	0	1	1	hypothetical protein	50S ribosomal protein L20		TRANSCRIPT_1924975-1925123-;TRANSCRIPT_1925046-1925205+;	ncRNA:149 bp;ncRNA:160 bp;	-1;-1;	-
Shewanella sediminis HAW-EB3	Bacteria; Proteobacteria; Gammaproteobacteria	NC_009831	2041290	2041697	0	1	2	hypothetical protein	phosphate acetyltransferase		TRANSCRIPT_2041491-2041614+;	ncRNA:124 bp;	-1;	-
Serratia proteamaculans 568	Bacteria; Proteobacteria; Gammaproteobacteria	NC_009832	309403	309659	0	1	1	elongation factor Tu	preprotein translocase subunit SecE		TRANSCRIPT_309433-309524-;TRANSCRIPT_309571-309598+;	ncRNA:92 bp;ncRNA:28 bp;	-1;-1;	-
Serratia proteamaculans 568	Bacteria; Proteobacteria; Gammaproteobacteria	NC_009832	1446304	1447441	0	4	3	ABC transporter-related protein	excinuclease ABC subunit B		TRANSCRIPT_1446911-1447312-;	ncRNA:402 bp;	-1;	-
Shewanella pealeana ATCC 700345	Bacteria; Proteobacteria; Gammaproteobacteria	NC_009901	1243517	1244207	0	1	1	DNA mismatch repair protein	dinucleoside polyphosphate hydrolase		TRANSCRIPT_1244012-1244073+;TRANSCRIPT_1244041-1244155-;	ncRNA:62 bp;ncRNA:115 bp;	-1;-1;	-
Shewanella pealeana ATCC 700345	Bacteria; Proteobacteria; Gammaproteobacteria	NC_009901	2020122	2020750	0	1	2	hypothetical protein	phosphate acetyltransferase		TRANSCRIPT_2020317-2020726+;	ncRNA:410 bp;	-1;	-
Desulfococcus oleovorans Hxd3	Bacteria; Proteobacteria; Deltaproteobacteria	NC_009943	11675	11992	0	3	1	hypothetical protein	integrin-like repeat-containing protein		TRANSCRIPT_11714-11847+;	ncRNA:134 bp;	-1;	-
Desulfococcus oleovorans Hxd3	Bacteria; Proteobacteria; Deltaproteobacteria	NC_009943	1012949	1013299	0	1	1	hypothetical protein	hypothetical protein		TRANSCRIPT_1013143-1013172-;	ncRNA:30 bp;	-1;	-
Desulfococcus oleovorans Hxd3	Bacteria; Proteobacteria; Deltaproteobacteria	NC_009943	2624684	2625047	0	1	3	acyl-CoA dehydrogenase domain-containing protein	diguanylate cyclase		TRANSCRIPT_2624735-2624768-;TRANSCRIPT_2624838-2624899-;	ncRNA:34 bp;ncRNA:62 bp;	-1;-1;	-
Herpetosiphon aurantiacus ATCC 23779	Bacteria; Chloroflexi; Herpetosiphonales	NC_009972	4477889	4478385	0	1	1	hypothetical protein	prolyl-tRNA synthetase		TRANSCRIPT_4478068-4478363+;	ncRNA:296 bp;	-1;	-
Shewanella baltica OS195	Bacteria; Proteobacteria; Gammaproteobacteria	NC_009997	1527634	1527893	0	1	1	50S ribosomal protein L19	phospho-2-dehydro-3-deoxyheptonate aldolase		TRANSCRIPT_1527674-1527741-;	ncRNA:68 bp;	-1;	-
Clostridium phytofermentans ISDg	Bacteria; Firmicutes; Clostridia	NC_010001	1384072	1384260	0	1	1	GTP-binding proten HflX	ECF subfamily RNA polymerase sigma-24 factor		TRANSCRIPT_1384131-1384187+;	ncRNA:57 bp;	-1;	-
Clostridium phytofermentans ISDg	Bacteria; Firmicutes; Clostridia	NC_010001	2018097	2018689	0	2	5	hypothetical protein	hypothetical protein		TRANSCRIPT_2018172-2018289-;	ncRNA:118 bp;	-1;	-
Clostridium phytofermentans ISDg	Bacteria; Firmicutes; Clostridia	NC_010001	3255542	3255878	0	3	2	threonyl-tRNA synthetase	periplasmic binding protein		TRANSCRIPT_3255583-3255644-;	ncRNA:62 bp;	-1;	-
Clostridium phytofermentans ISDg	Bacteria; Firmicutes; Clostridia	NC_010001	4419778	4420611	0	8	1	hypothetical protein	hypothetical protein		TRANSCRIPT_4420495-4420561-;	ncRNA:67 bp;	-1;	-
Clostridium phytofermentans ISDg	Bacteria; Firmicutes; Clostridia	NC_010001	4567730	4568099	0	2	1	hypothetical protein	hypothetical protein		TRANSCRIPT_4567779-4567934+;TRANSCRIPT_4567906-4568036-;	ncRNA:156 bp;ncRNA:131 bp;	-1;-1;	-
Clostridium phytofermentans ISDg	Bacteria; Firmicutes; Clostridia	NC_010001	4669863	4670156	0	1	1	rubrerythrin	HAD family hydrolase		TRANSCRIPT_4669963-4670008+;TRANSCRIPT_4669968-4670060-;	ncRNA:46 bp;ncRNA:93 bp;	-1;-1;	-
Petrotoga mobilis SJ95	Bacteria; Thermotogae; Thermotogales	NC_010003	1815523	1815975	0	1	3	extracellular solute-binding protein	asparagine synthetase A		TRANSCRIPT_1815834-1815918-;TRANSCRIPT_1815734-1815918+;	ncRNA:85 bp;ncRNA:185 bp;	-1;-1;	-
Petrotoga mobilis SJ95	Bacteria; Thermotogae; Thermotogales	NC_010003	1950499	1950862	0	9	1	pseudogene	extracellular solute-binding protein		TRANSCRIPT_1950670-1950763+;	ncRNA:94 bp;	-1;	-
Yersinia pestis Angola	Bacteria; Proteobacteria; Gammaproteobacteria	NC_010158	39992	40229	0	1	9	pseudogene	IS605 family transposase		TRANSCRIPT_40095-40138-;	ncRNA:44 bp;	-1;	-
Bacillus weihenstephanensis KBAB4	Bacteria; Firmicutes; Bacillales	NC_010184	811589	811900	0	1	1	hypothetical protein	hypothetical protein		TRANSCRIPT_811705-811832+;	ncRNA:128 bp;	-1;	-
Pseudomonas putida GB-1	Bacteria; Proteobacteria; Gammaproteobacteria	NC_010322	1462236	1462523	0	3	1	peptidylprolyl isomerase FKBP-type	hypothetical protein		TRANSCRIPT_1462253-1462326-;	ncRNA:74 bp;	-1;	-
Yersinia pseudotuberculosis YPIII	Bacteria; Proteobacteria; Gammaproteobacteria	NC_010465	2910781	2911077	0	4	1	asparaginyl-tRNA synthetase	porin		TRANSCRIPT_2910818-2910875-;	ncRNA:58 bp;	-1;	-
Escherichia coli ATCC 8739	Bacteria; Proteobacteria; Gammaproteobacteria	NC_010468	1891608	1891904	0	2	1	mannosyl-3-phosphoglycerate phosphatase	hypothetical protein		TRANSCRIPT_1891805-1891895+;	ncRNA:91 bp;	-1;	-
Polynucleobacter necessarius subsp. necessarius STIR1	Bacteria; Proteobacteria; Betaproteobacteria	NC_010531	1389842	1390265	0	1	1	50S ribosomal protein L13	OsmC family protein		TRANSCRIPT_1390004-1390183-;	ncRNA:180 bp;	-1;	-
Xylella fastidiosa M23	Bacteria; Proteobacteria; Gammaproteobacteria	NC_010577	2449356	2450341	0	4	4	cellulase	glutamate synthase subunit beta		TRANSCRIPT_2450161-2450242-;	ncRNA:82 bp;	-1;	-
Elusimicrobium minutum Pei191	Bacteria; Elusimicrobia; Elusimicrobia (class)	NC_010644	799398	799794	0	2	1	trigger factor domain-containing protein	hypothetical protein		TRANSCRIPT_799677-799737-;	ncRNA:61 bp;	-1;	-
Akkermansia muciniphila ATCC BAA-835	Bacteria; Verrucomicrobia; Verrucomicrobiae	NC_010655	2475432	2475864	0	1	1	PUR-alpha/beta/gamma DNA/RNA-binding	putative alpha-isopropylmalate/homocitrate synthase family transferase		TRANSCRIPT_2475530-2475638-;	ncRNA:109 bp;	-1;	-
Sulfurihydrogenibium sp. YO3AOP1	Bacteria; Aquificae; Aquificales	NC_010730	1389466	1389865	0	3	5	protein of unknown function DUF399	protein of unknown function DUF107		TRANSCRIPT_1389465-1389592-;	ncRNA:128 bp;	-1;	-
Chlorobium limicola DSM 245	Bacteria; Chlorobi; Chlorobia	NC_010803	767893	768268	0	6	3	cobyrinic acid a,c-diamide synthase	sulfur relay protein, TusE/DsrC/DsvC family		TRANSCRIPT_768086-768225-;	ncRNA:140 bp;	-1;	-
Geobacter lovleyi SZ	Bacteria; Proteobacteria; Deltaproteobacteria	NC_010814	644862	645300	0	2	4	hypothetical protein	Fibronectin type III domain protein		TRANSCRIPT_644884-645010-;TRANSCRIPT_645037-645176+;	ncRNA:127 bp;ncRNA:140 bp;	-1;-1;	-
Geobacter lovleyi SZ	Bacteria; Proteobacteria; Deltaproteobacteria	NC_010814	1727805	1728010	0	1	1	Peptidoglycan-binding LysM	isocitrate dehydrogenase, NADP-dependent		TRANSCRIPT_1727923-1727976+;	ncRNA:54 bp;	-1;	-
Bifidobacterium longum DJO10A	Bacteria; Actinobacteria; Actinobacteridae	NC_010816	1606566	1607198	0	3	8	putative septation inhibitor protein	hypothetical protein		TRANSCRIPT_1606639-1606911-;	ncRNA:273 bp;	-1;	-
Bifidobacterium longum DJO10A	Bacteria; Actinobacteria; Actinobacteridae	NC_010816	2186799	2187023	0	1	4	UDP-glucose 4-epimerase	tRNA-Asp		TRANSCRIPT_2186846-2186934-;	ncRNA:89 bp;	-1;	-
Salmonella enterica subsp. enterica serovar Schwarzengrund str. CVM19633	Bacteria; Proteobacteria; Gammaproteobacteria	NC_011092	26538	27047	0	1	1	IS1 protein InsB	transposase		TRANSCRIPT_26813-27002-;TRANSCRIPT_26612-26859+;	ncRNA:190 bp;ncRNA:248 bp;	-1;-1;	-
Alteromonas macleodii 'Deep ecotype'	Bacteria; Proteobacteria; Gammaproteobacteria	NC_011138	835878	836129	0	1	3	TonB system transport protein ExbD2	phage-related DNA polymerase		TRANSCRIPT_835950-835977+;	ncRNA:28 bp;	-1;	-
Alteromonas macleodii 'Deep ecotype'	Bacteria; Proteobacteria; Gammaproteobacteria	NC_011138	1062324	1062603	0	1	2	hypothetical protein	aromatic amino acid aminotransferase		TRANSCRIPT_1062377-1062575+;	ncRNA:199 bp;	-1;	-
Alteromonas macleodii 'Deep ecotype'	Bacteria; Proteobacteria; Gammaproteobacteria	NC_011138	1732762	1733449	0	2	1	regulator of pathogenicity factors	putative fucose permease		TRANSCRIPT_1733262-1733342-;	ncRNA:81 bp;	-1;	-
Alteromonas macleodii 'Deep ecotype'	Bacteria; Proteobacteria; Gammaproteobacteria	NC_011138	1872867	1873527	0	2	1	hypothetical protein	hypothetical protein		TRANSCRIPT_1873273-1873302-;TRANSCRIPT_1873410-1873463-;	ncRNA:30 bp;ncRNA:54 bp;	-1;-1;	-
Geobacter bemidjiensis Bem	Bacteria; Proteobacteria; Deltaproteobacteria	NC_011146	382358	382718	0	3	1	Auxin Efflux Carrier	hypothetical protein		TRANSCRIPT_382519-382655+;	ncRNA:137 bp;	-1;	-
Geobacter bemidjiensis Bem	Bacteria; Proteobacteria; Deltaproteobacteria	NC_011146	1042723	1042946	0	1	1	hydro-lyase, Fe-S type, tartrate/fumarate subfamily, beta subunit	hypothetical protein		TRANSCRIPT_1042774-1042914+;	ncRNA:141 bp;	-1;	-
Geobacter bemidjiensis Bem	Bacteria; Proteobacteria; Deltaproteobacteria	NC_011146	1500965	1501423	0	1	1	threonine synthase	hypothetical protein		TRANSCRIPT_1501037-1501407+;	ncRNA:371 bp;	-1;	-
Geobacter bemidjiensis Bem	Bacteria; Proteobacteria; Deltaproteobacteria	NC_011146	1921026	1921842	0	4	6	AMMECR1 domain protein	nucleoside diphosphate kinase		TRANSCRIPT_1921429-1921455-;TRANSCRIPT_1921723-1921790-;TRANSCRIPT_1921419-1921753+;	ncRNA:27 bp;ncRNA:68 bp;ncRNA:335 bp;	-1;-1;-1;	-
Geobacter bemidjiensis Bem	Bacteria; Proteobacteria; Deltaproteobacteria	NC_011146	3086032	3086265	0	1	1	glucose/sorbosone dehydrogenase-like protein	hypothetical protein		TRANSCRIPT_3086199-3086264+;	ncRNA:66 bp;	-1;	-
Escherichia coli O157:H7 str. EC4115	Bacteria; Proteobacteria; Gammaproteobacteria	NC_011353	1460255	1460548	0	2	2	putative metallodependent hydrolase	PTS system glucose-specific transporter subunits IIBC		TRANSCRIPT_1460300-1460330-;	ncRNA:31 bp;	-1;	-
Ureaplasma urealyticum serovar 10 str. ATCC 33699	Bacteria; Tenericutes; Mollicutes	NC_011374	444428	445310	0	1	3	hypothetical protein	hypothetical protein		TRANSCRIPT_444435-445168-;TRANSCRIPT_444614-444784+;TRANSCRIPT_445215-445237-;	ncRNA:734 bp;ncRNA:171 bp;ncRNA:23 bp;	-1;-1;-1;	-
Bacillus cereus AH187	Bacteria; Firmicutes; Bacillales	NC_011658	182837	183118	0	3	1	putative ABC transporter, substrate-binding protein	oxidoreductase, zinc-binding dehydrogenase family		TRANSCRIPT_182870-183063-;	ncRNA:194 bp;	-1;	-
Bacillus cereus AH187	Bacteria; Firmicutes; Bacillales	NC_011658	237254	237485	0	1	1	putative homogentisate 1,2-dioxygenase	amino acid transporter, cationic amino acid transporter (CAT) family		TRANSCRIPT_237256-237321-;	ncRNA:66 bp;	-1;	-
Thauera sp. MZ1T	Bacteria; Proteobacteria; Betaproteobacteria	NC_011662	1267625	1268040	0	1	2	molybdopterin oxidoreductase	D-isomer specific 2-hydroxyacid dehydrogenase NAD-binding		TRANSCRIPT_1267629-1267693-;	ncRNA:65 bp;	-1;	-
Thauera sp. MZ1T	Bacteria; Proteobacteria; Betaproteobacteria	NC_011662	1365601	1366228	0	3	1	OsmC family protein	50S ribosomal protein L13		TRANSCRIPT_1365993-1366112+;	ncRNA:120 bp;	-1;	-
Desulfitobacterium hafniense DCB-2	Bacteria; Firmicutes; Clostridia	NC_011830	439310	439787	0	5	5	glutamyl-tRNA synthetase	serine O-acetyltransferase		TRANSCRIPT_439451-439725+;	ncRNA:275 bp;	-1;	-
Desulfitobacterium hafniense DCB-2	Bacteria; Firmicutes; Clostridia	NC_011830	545972	546105	0	1	1	response regulator receiver and SARP domain protein	Immunoglobulin I-set domain protein		TRANSCRIPT_545988-546014-;	ncRNA:27 bp;	-1;	-
Desulfitobacterium hafniense DCB-2	Bacteria; Firmicutes; Clostridia	NC_011830	1248509	1248841	0	1	2	DNA-directed DNA polymerase	hypothetical protein		TRANSCRIPT_1248651-1248734-;	ncRNA:84 bp;	-1;	-
Desulfitobacterium hafniense DCB-2	Bacteria; Firmicutes; Clostridia	NC_011830	2442175	2442360	0	1	4	CheC domain protein	diguanylate cyclase and metal dependent phosphohydrolase		TRANSCRIPT_2442197-2442222-;	ncRNA:26 bp;	-1;	-
Desulfitobacterium hafniense DCB-2	Bacteria; Firmicutes; Clostridia	NC_011830	3481799	3482196	0	4	4	hypothetical protein	periplasmic binding protein		TRANSCRIPT_3481936-3482161+;	ncRNA:226 bp;	-1;	-
Desulfitobacterium hafniense DCB-2	Bacteria; Firmicutes; Clostridia	NC_011830	4096790	4097163	0	1	1	protein of unknown function DUF74	uracil-xanthine permease		TRANSCRIPT_4097021-4097137+;	ncRNA:117 bp;	-1;	-
Desulfitobacterium hafniense DCB-2	Bacteria; Firmicutes; Clostridia	NC_011830	4324106	4324284	0	3	1	Xanthine/uracil/vitamin C permease	dihydrolipoamide dehydrogenase		TRANSCRIPT_4324196-4324271+;	ncRNA:76 bp;	-1;	-
Acidovorax ebreus TPSY	Bacteria; Proteobacteria; Betaproteobacteria	NC_011992	1428061	1428294	0	1	2	fumarate lyase	phasin family protein		TRANSCRIPT_1428124-1428239-;	ncRNA:116 bp;	-1;	-
Slackia heliotrinireducens DSM 20476	Bacteria; Actinobacteria; Coriobacteridae	NC_013165	285598	286603	0	1	5	DNA replication and repair protein RecR	arginine deiminase		TRANSCRIPT_285757-285824+;TRANSCRIPT_285788-286411-;	ncRNA:68 bp;ncRNA:624 bp;	-1;-1;	-
Slackia heliotrinireducens DSM 20476	Bacteria; Actinobacteria; Coriobacteridae	NC_013165	2439266	2439815	0	1	3	LSU ribosomal protein L13P	N-acetyl-gamma-glutamyl-phosphate reductase, common form		TRANSCRIPT_2439659-2439767-;TRANSCRIPT_2439605-2439699+;	ncRNA:109 bp;ncRNA:95 bp;	-1;-1;	-
Anaerococcus prevotii DSM 20548	Bacteria; Firmicutes; Clostridia	NC_013171	935937	936826	0	1	2	hypothetical protein	hypothetical protein		TRANSCRIPT_936104-936143+;TRANSCRIPT_936443-936611+;TRANSCRIPT_936712-936754+;	ncRNA:40 bp;ncRNA:169 bp;ncRNA:43 bp;	-1;-1;-1;	-
Desulfotomaculum acetoxidans DSM 771	Bacteria; Firmicutes; Clostridia	NC_013216	4509151	4510310	0	1	1	BioY protein	hypothetical protein		TRANSCRIPT_4509279-4509344-;TRANSCRIPT_4509392-4509873-;TRANSCRIPT_4509596-4509796+;TRANSCRIPT_4509886-4509987+;	ncRNA:66 bp;ncRNA:482 bp;ncRNA:201 bp;ncRNA:102 bp;	-1;-1;-1;-1;	-
Pectobacterium wasabiae WPP163	Bacteria; Proteobacteria; Gammaproteobacteria	NC_013421	3696577	3697391	0	1	2	Amidohydrolase 3	SecY interacting protein Syd		TRANSCRIPT_3696619-3696808+;TRANSCRIPT_3696778-3697258-;TRANSCRIPT_3697296-3697338-;	ncRNA:190 bp;ncRNA:481 bp;ncRNA:43 bp;	-1;-1;-1;	-
Halothiobacillus neapolitanus c2	Bacteria; Proteobacteria; Gammaproteobacteria	NC_013422	1222758	1223001	0	2	2	cytochrome c prime	methyl-accepting chemotaxis sensory transducer		TRANSCRIPT_1222834-1222958-;	ncRNA:125 bp;	-1;	-
Sebaldella termitidis ATCC 33386	Bacteria; Fusobacteria; Fusobacteriales	NC_013517	2464888	2465198	0	3	3	hypothetical protein	competence/damage-inducible protein CinA		TRANSCRIPT_2464929-2464997+;	ncRNA:69 bp;	-1;	-
Sebaldella termitidis ATCC 33386	Bacteria; Fusobacteria; Fusobacteriales	NC_013517	2928773	2929296	0	1	1	hypothetical protein	GTP-binding proten HflX		TRANSCRIPT_2928995-2929197+;	ncRNA:203 bp;	-1;	-
Sebaldella termitidis ATCC 33386	Bacteria; Fusobacteria; Fusobacteriales	NC_013517	4232393	4232790	0	1	1	ribosomal protein S12	hypothetical protein		TRANSCRIPT_4232575-4232667+;	ncRNA:93 bp;	-1;	-
Dehalococcoides sp. VS	Bacteria; Chloroflexi; Dehalococcoidetes	NC_013552	46764	47030	0	2	1	alcohol dehydrogenase, iron-containing	23S ribosomal RNA		TRANSCRIPT_46869-46971+;	ncRNA:103 bp;	-1;	-
Dehalococcoides sp. VS	Bacteria; Chloroflexi; Dehalococcoidetes	NC_013552	396606	396773	0	1	1	hypothetical protein	ribosomal protein S12		TRANSCRIPT_396660-396720+;	ncRNA:61 bp;	-1;	-
Haloterrigena turkmenica DSM 5511	Archaea; Euryarchaeota; Halobacteria	NC_013746	156876	157539	0	1	2	hypothetical protein	hypothetical protein		TRANSCRIPT_157222-157422-;	ncRNA:201 bp;	-1;	-
Escherichia coli BL21(DE3)	Bacteria; Proteobacteria; Gammaproteobacteria	CP001509	2807259	2807942	0	2	1	dinucleoside polyphosphate hydrolase	DNA mismatch repair protein	ORF 53AA:2807703-2807864+;				-
Escherichia coli DH1	Bacteria; Proteobacteria; Gammaproteobacteria	CP001637	3849971	3850298	0	6	2	riboflavin biosynthesis protein RibF	ribosomal protein S20	ORF 72AA:3849978-3850196-;				-
Sulfolobus solfataricus 98/2	Archaea; Crenarchaeota; Thermoprotei	CP001800	2435680	2436783	0	1	1	Transposase, ISC1234/ST1916, Sulfolobus	hypothetical protein	ORF 109AA:2435773-2436102-;				-
Dehalococcoides ethenogenes 195	Bacteria; Chloroflexi; Dehalococcoidetes	NC_002936	1400914	1401623	0	5	1	hypothetical protein	DNA-binding protein	ORF 196AA:1400945-1401535-;				-
Treponema denticola ATCC 35405	Bacteria; Spirochaetes; Spirochaetales	NC_002967	1084422	1085349	0	2	3	MATE efflux family protein	hypothetical protein	ORF 112AA:1084846-1085184+;				-
Pseudomonas syringae pv. syringae B728a	Bacteria; Proteobacteria; Gammaproteobacteria	NC_007005	5542542	5542944	0	4	5	hypothetical protein	Acyl-CoA dehydrogenase, C-terminal:Acyl-CoA dehydrogenase, central region	ORF 91AA:5542581-5542856-;				-
Psychrobacter arcticus 273-4	Bacteria; Proteobacteria; Gammaproteobacteria	NC_007204	1179641	1180569	0	3	4	hypothetical protein	DNA binding protein	ORF 57AA:1180202-1180375+;				-
Nitrosococcus oceani ATCC 19707	Bacteria; Proteobacteria; Gammaproteobacteria	NC_007484	526221	527265	0	2	2	hypothetical protein	peptidoglycan-binding LysM	ORF 58AA:526937-527113-;				-
Rhodobacter sphaeroides 2.4.1	Bacteria; Proteobacteria; Alphaproteobacteria	NC_007490	100271	435	0	3	5	hypothetical protein	hypothetical protein	ORF 160AA:100485-139+;				-
Burkholderia sp. 383	Bacteria; Proteobacteria; Betaproteobacteria	NC_007510	1648758	1649693	0	7	7	hypothetical protein	peptidase A24A, prepilin type IV	ORF 86AA:1649344-1649604+;				-
Chlorobium luteolum DSM 273	Bacteria; Chlorobi; Chlorobia	NC_007512	2067928	2068733	0	1	1	putative transposase	hypothetical protein	ORF 57AA:2067957-2068130-;				-
Chlorobium chlorochromatii CaD3	Bacteria; Chlorobi; Chlorobia	NC_007514	148796	149293	0	1	3	6,7-dimethyl-8-ribityllumazine synthase	hypothetical protein	ORF 78AA:148946-149182+;				-
Saccharophagus degradans 2-40	Bacteria; Proteobacteria; Gammaproteobacteria	NC_007912	666314	666795	0	5	2	LamB/YcsF family protein	D-tyrosyl-tRNA(Tyr) deacylase	ORF 74AA:666338-666562-;				-
Pseudomonas aeruginosa UCBPP-PA14	Bacteria; Proteobacteria; Gammaproteobacteria	NC_008463	1312362	1312654	0	3	1	oriT-binding protein, TraK	conjugal transfer relaxosome component TraJ	ORF 91AA:1312379-1312654+;				-
Clostridium thermocellum ATCC 27405	Bacteria; Firmicutes; Clostridia	NC_009012	810554	811068	0	2	5	type IV pilus assembly protein PilM	hypothetical protein	ORF 57AA:810809-810982+;				-
Enterobacter sp. 638	Bacteria; Proteobacteria; Gammaproteobacteria	NC_009436	655047	655374	0	1	2	30S ribosomal protein S20	bifunctional riboflavin kinase/FMN adenylyltransferase	ORF 66AA:655062-655262+;				-
Yersinia pseudotuberculosis IP 31758	Bacteria; Proteobacteria; Gammaproteobacteria	NC_009708	1172563	1173258	0	6	2	DNA mismatch repair protein	dinucleoside polyphosphate hydrolase	ORF 63AA:1172795-1172986+;				-
Campylobacter curvus 525.92	Bacteria; Proteobacteria; Epsilonproteobacteria	NC_009715	876482	876985	0	1	1	tRNA-Leu	hypothetical protein	ORF 100AA:876557-876859-;				-
Escherichia coli E24377A	Bacteria; Proteobacteria; Gammaproteobacteria	NC_009801	1447835	1448306	0	2	1	hypothetical protein	hypothetical protein	ORF 55AA:1447872-1448039-;				-
Escherichia coli E24377A	Bacteria; Proteobacteria; Gammaproteobacteria	NC_009801	3734668	3735239	0	1	1	pseudogene	acetyl-CoA carboxylase biotin carboxyl carrier protein subunit	ORF 53AA:3734937-3735098-;				-
Serratia proteamaculans 568	Bacteria; Proteobacteria; Gammaproteobacteria	NC_009832	4232671	4233366	0	2	3	dinucleoside polyphosphate hydrolase	DNA mismatch repair protein	ORF 51AA:4233108-4233263-;				-
Herpetosiphon aurantiacus ATCC 23779	Bacteria; Chloroflexi; Herpetosiphonales	NC_009972	1677252	1677568	0	3	1	SsrA-binding protein	orotidine 5'-phosphate decarboxylase	ORF 52AA:1677324-1677482-;				-
Burkholderia multivorans ATCC 17616	Bacteria; Proteobacteria; Betaproteobacteria	NC_010086	640372	640984	0	3	2	Beta-lactamase	integral membrane sensor signal transduction histidine kinase	ORF 59AA:640393-640572+;				-
Yersinia pestis Angola	Bacteria; Proteobacteria; Gammaproteobacteria	NC_010159	487444	487910	0	1	2	bifunctional phosphoribosylaminoimidazolecarboxamide formyltransferase/IMP cyclohydrolase	hypothetical protein	ORF 76AA:487601-487831+;ORF 58AA:487522-487698-;				-
Yersinia pseudotuberculosis YPIII	Bacteria; Proteobacteria; Gammaproteobacteria	NC_010465	1161119	1161814	0	5	3	DNA mismatch repair protein	dinucleoside polyphosphate hydrolase	ORF 63AA:1161351-1161542+;				-
Escherichia coli ATCC 8739	Bacteria; Proteobacteria; Gammaproteobacteria	NC_010468	694702	694942	0	2	2	putative signal transduction protein	adenylate cyclase	ORF 68AA:694720-694926+;				-
Escherichia coli ATCC 8739	Bacteria; Proteobacteria; Gammaproteobacteria	NC_010468	951043	951726	0	3	2	DNA mismatch repair protein	dinucleoside polyphosphate hydrolase	ORF 53AA:951121-951282-;				-
Escherichia coli SMS-3-5	Bacteria; Proteobacteria; Gammaproteobacteria	NC_010498	26263	26590	0	1	4	30S ribosomal protein S20	bifunctional riboflavin kinase/FMN adenylyltransferase	ORF 72AA:26365-26583+;				-
Salmonella enterica subsp. enterica serovar Newport str. SL254	Bacteria; Proteobacteria; Gammaproteobacteria	NC_011080	3624030	3624493	0	2	2	shikimate kinase I	outer membrane porin HofQ	ORF 61AA:3624056-3624241-;				-
Alteromonas macleodii 'Deep ecotype'	Bacteria; Proteobacteria; Gammaproteobacteria	NC_011138	2355946	2357003	0	6	1	Glutathione peroxidase	response regulator receiver protein	ORF 67AA:2356402-2356605+;ORF 68AA:2356354-2356560-;				-
Salmonella enterica subsp. enterica serovar Dublin str. CT_02021853	Bacteria; Proteobacteria; Gammaproteobacteria	NC_011205	633140	634410	0	5	1	hypothetical protein	gp23	ORF 131AA:633395-633790+;ORF 67AA:633787-633990+;				-
Salmonella enterica subsp. enterica serovar Dublin str. CT_02021853	Bacteria; Proteobacteria; Gammaproteobacteria	NC_011205	1084826	1086075	0	2	3	hypothetical protein	gifsy-1 prophage cI	ORF 78AA:1085649-1085885+;ORF 134AA:1085115-1085519-;				-
Aliivibrio salmonicida LFI1238	Bacteria; Proteobacteria; Gammaproteobacteria	NC_011312	909156	910341	0	4	2	ATP-dependent Clp protease proteolytic subunit	anti-sense RNA (RNA-OUT)	ORF 352AA:909242-910300+;				-
Escherichia coli O157:H7 str. EC4115	Bacteria; Proteobacteria; Gammaproteobacteria	NC_011353	780573	780950	0	1	3	tRNA-Met	asparagine synthetase B	ORF 57AA:780615-780788+;				-
Escherichia coli O157:H7 str. EC4115	Bacteria; Proteobacteria; Gammaproteobacteria	NC_011353	1690558	1691268	0	1	1	porcine attaching-effacing associated protein	hypothetical protein	ORF 70AA:1690836-1691048+;				-
Escherichia coli BL21	Bacteria; Proteobacteria; Gammaproteobacteria	NC_012892	2806467	2807150	0	2	1	hypothetical protein	hypothetical protein	ORF 53AA:2806911-2807072+;				-
Meiothermus silvanus DSM 9946	Bacteria; Deinococcus-Thermus; Deinococci	NC_014213	347309	5	0	1	1	pseudogene	pseudogene	ORF 164AA:347356-347850-;				-
Nitrosococcus oceani ATCC 19707	Bacteria; Proteobacteria; Gammaproteobacteria	NC_007484	658043	658834	0	5	6	TPR repeat-containing protein	exodeoxyribonuclease VII		TRANSCRIPT_658540-658834+;	orf_within_transcript:47aa 658568-658711+;	-1;	-
Pseudomonas aeruginosa UCBPP-PA14	Bacteria; Proteobacteria; Gammaproteobacteria	NC_008463	4749670	4750545	0	20	2	hypothetical protein	putative integrase		TRANSCRIPT_4750088-4750478-;	orf_within_transcript:30aa 4750246-4750338-;	-1;	-
Chlorobium phaeobacteroides DSM 266	Bacteria; Chlorobi; Chlorobia	NC_008639	2970554	2971422	0	2	1	magnesium-protoporphyrin IX monomethyl ester (oxidative) cyclase	metallophosphoesterase		TRANSCRIPT_2970852-2971212+;	orf_within_transcript:54aa 2971039-2971203+;	-1;	-
Roseiflexus sp. RS-1	Bacteria; Chloroflexi; Chloroflexales	NC_009523	2173718	2174372	0	1	6	hypothetical protein	O-acetylhomoserine/O-acetylserine sulfhydrylase		TRANSCRIPT_2173939-2174228+;	orf_within_transcript:34aa 2174034-2174138+;	-1;	-
Delftia acidovorans SPH-1	Bacteria; Proteobacteria; Betaproteobacteria	NC_010002	2121350	2122344	0	9	4	hypothetical protein	hypothetical protein		TRANSCRIPT_2121370-2122060-;	orf_within_transcript:41aa 2121791-2121916-;	-1;	-
Caulobacter sp. K31	Bacteria; Proteobacteria; Alphaproteobacteria	NC_010335	203950	204545	0	2	1	hypothetical protein	hypothetical protein		TRANSCRIPT_204080-204525+;	orf_within_transcript:88aa 204184-204450+;	-1;	-
Agrobacterium vitis S4	Bacteria; Proteobacteria; Alphaproteobacteria	NC_011989	2407965	2409141	0	4	2	D-alanine--D-alanine ligase	ABC transporter membrane spanning protein (sugar)		TRANSCRIPT_2408285-2408833-;	orf_within_transcript:80aa 2408419-2408661-;	-1;	-
Escherichia coli BL21	Bacteria; Proteobacteria; Gammaproteobacteria	NC_012892	4296760	4297537	0	2	1	hypothetical protein	hypothetical protein		TRANSCRIPT_4296919-4297323+;	orf_within_transcript:54aa 4297001-4297165+;	-1;	-
Alicyclobacillus acidocaldarius subsp. acidocaldarius DSM 446	Bacteria; Firmicutes; Bacillales	NC_013205	142768	143422	0	2	3	transcriptional regulator, AbrB family	methionyl-tRNA synthetase		TRANSCRIPT_142913-143361+;	orf_within_transcript:55aa 143018-143185+;	-1;	-
Escherichia coli BL21(DE3)	Bacteria; Proteobacteria; Gammaproteobacteria	CP001509	3289933	3290405	0	4	2	16S ribosomal RNA	hypothetical protein					+
Pseudomonas putida KT2440	Bacteria; Proteobacteria; Gammaproteobacteria	NC_002947	176355	176816	0	3	3	5S ribosomal RNA	16S ribosomal RNA					+
Pseudomonas putida KT2440	Bacteria; Proteobacteria; Gammaproteobacteria	NC_002947	1325029	1325500	0	4	2	formate/nitrate transporter	16S ribosomal RNA					+
Pseudomonas putida KT2440	Bacteria; Proteobacteria; Gammaproteobacteria	NC_002947	2548199	2548686	0	1	4	EamA family protein	16S ribosomal RNA					+
Burkholderia mallei ATCC 23344	Bacteria; Proteobacteria; Betaproteobacteria	NC_006348	1885180	1885438	0	2	1	16S ribosomal RNA	hypothetical protein					+
Pseudomonas syringae pv. syringae B728a	Bacteria; Proteobacteria; Gammaproteobacteria	NC_007005	771503	772095	0	2	4	methylmalonate-semialdehyde dehydrogenase	16S ribosomal RNA					+
Pseudomonas syringae pv. syringae B728a	Bacteria; Proteobacteria; Gammaproteobacteria	NC_007005	964186	964685	0	1	2	putative sulfite oxidase subunit YedZ	16S ribosomal RNA					+
Pseudomonas syringae pv. syringae B728a	Bacteria; Proteobacteria; Gammaproteobacteria	NC_007005	5428265	5428771	0	1	2	16S ribosomal RNA	tyrosyl-tRNA synthetase					+
Pseudomonas syringae pv. syringae B728a	Bacteria; Proteobacteria; Gammaproteobacteria	NC_007005	5953187	5953776	0	1	7	16S ribosomal RNA	L-carnitine dehydratase/bile acid-inducible protein F					+
Burkholderia pseudomallei 1710b	Bacteria; Proteobacteria; Betaproteobacteria	NC_007434	3887046	3887622	0	1	1	16S ribosomal RNA	enoyl-CoA hydratase					+
Burkholderia pseudomallei 1710b	Bacteria; Proteobacteria; Betaproteobacteria	NC_007435	2323311	2323930	0	1	1	hypothetical protein	16S ribosomal RNA					+
Burkholderia sp. 383	Bacteria; Proteobacteria; Betaproteobacteria	NC_007510	506796	507417	0	1	2	enoyl-CoA hydratase	16S ribosomal RNA					+
Burkholderia sp. 383	Bacteria; Proteobacteria; Betaproteobacteria	NC_007511	379831	380392	0	1	5	HD phosphohydrolase-like	16S ribosomal RNA					+
Synechococcus elongatus PCC 7942	Bacteria; Cyanobacteria; Chroococcales	NC_007604	568280	568588	0	1	1	hypothetical protein	16S ribosomal RNA					+
Burkholderia thailandensis E264	Bacteria; Proteobacteria; Betaproteobacteria	NC_007650	2495759	2496381	0	3	2	16S ribosomal RNA	hypothetical protein					+
Burkholderia thailandensis E264	Bacteria; Proteobacteria; Betaproteobacteria	NC_007651	3333254	3333868	0	3	3	16S ribosomal RNA	enoyl-CoA hydratase					+
Methylobacillus flagellatus KT	Bacteria; Proteobacteria; Betaproteobacteria	NC_007947	2234879	2235290	0	4	3	16S ribosomal RNA	tRNA-Met					+
Burkholderia xenovorans LB400	Bacteria; Proteobacteria; Betaproteobacteria	NC_007951	1425062	1425592	0	1	3	hypothetical protein	16S ribosomal RNA					+
Burkholderia xenovorans LB400	Bacteria; Proteobacteria; Betaproteobacteria	NC_007952	1555525	1556130	0	4	2	hypothetical protein	16S ribosomal RNA					+
Shewanella denitrificans OS217	Bacteria; Proteobacteria; Gammaproteobacteria	NC_007954	407798	408545	0	1	1	preprotein translocase subunit SecA	16S ribosomal RNA					+
Shewanella denitrificans OS217	Bacteria; Proteobacteria; Gammaproteobacteria	NC_007954	3413717	3414358	0	1	2	16S ribosomal RNA	CDP-diacylglycerol--serine O-phosphatidyltransferase					+
Chromohalobacter salexigens DSM 3043	Bacteria; Proteobacteria; Gammaproteobacteria	NC_007963	556757	557342	0	2	1	CDP-diacylglycerol--serine O-phosphatidyltransferase	16S ribosomal RNA					+
Deinococcus geothermalis DSM 11300	Bacteria; Deinococcus-Thermus; Deinococci	NC_008010	8406	8901	0	1	1	type I phosphodiesterase/nucleotide pyrophosphatase	16S ribosomal RNA					+
Burkholderia cenocepacia AU 1054	Bacteria; Proteobacteria; Betaproteobacteria	NC_008060	56799	57384	0	4	4	cytochrome B561	16S ribosomal RNA					+
Burkholderia cenocepacia AU 1054	Bacteria; Proteobacteria; Betaproteobacteria	NC_008060	1787853	1788428	0	3	3	16S ribosomal RNA	hypothetical protein					+
Burkholderia cenocepacia AU 1054	Bacteria; Proteobacteria; Betaproteobacteria	NC_008060	3049672	3050244	0	4	3	16S ribosomal RNA	lipolytic enzyme, G-D-S-L					+
Burkholderia cenocepacia AU 1054	Bacteria; Proteobacteria; Betaproteobacteria	NC_008061	96284	96795	0	1	1	HD phosphohydrolase-like	16S ribosomal RNA					+
Pseudoalteromonas atlantica T6c	Bacteria; Proteobacteria; Gammaproteobacteria	NC_008228	35569	36084	0	4	1	carbonic anhydrase/acetyltransferase	16S ribosomal RNA					+
Pseudoalteromonas atlantica T6c	Bacteria; Proteobacteria; Gammaproteobacteria	NC_008228	1201739	1202292	0	1	3	hypothetical protein	16S ribosomal RNA					+
Shewanella sp. MR-4	Bacteria; Proteobacteria; Gammaproteobacteria	NC_008321	252936	253458	0	1	5	redoxin domain-containing protein	16S ribosomal RNA					+
Shewanella sp. MR-7	Bacteria; Proteobacteria; Gammaproteobacteria	NC_008322	40885	41405	0	2	2	carbonic anhydrase	16S ribosomal RNA					+
Alkalilimnicola ehrlichii MLHE-1	Bacteria; Proteobacteria; Gammaproteobacteria	NC_008340	367626	368207	0	1	3	hypothetical protein	16S ribosomal RNA					+
Burkholderia ambifaria AMMD	Bacteria; Proteobacteria; Betaproteobacteria	NC_008390	16444	17027	0	1	3	16S ribosomal RNA	cytochrome B561					+
Burkholderia ambifaria AMMD	Bacteria; Proteobacteria; Betaproteobacteria	NC_008390	501943	502496	0	1	1	enoyl-CoA hydratase	16S ribosomal RNA					+
Burkholderia ambifaria AMMD	Bacteria; Proteobacteria; Betaproteobacteria	NC_008392	517135	517771	0	4	2	16S ribosomal RNA	hypothetical protein					+
Burkholderia cenocepacia HI2424	Bacteria; Proteobacteria; Betaproteobacteria	NC_008542	605864	606430	0	3	3	enoyl-CoA hydratase	16S ribosomal RNA					+
Burkholderia cenocepacia HI2424	Bacteria; Proteobacteria; Betaproteobacteria	NC_008542	2473401	2473967	0	2	4	16S ribosomal RNA	hypothetical protein					+
Burkholderia cenocepacia HI2424	Bacteria; Proteobacteria; Betaproteobacteria	NC_008543	2381708	2382266	0	2	1	16S ribosomal RNA	HD phosphohydrolase-like protein					+
Burkholderia cenocepacia HI2424	Bacteria; Proteobacteria; Betaproteobacteria	NC_008544	395526	396192	0	7	5	hypothetical protein	16S ribosomal RNA					+
Shewanella sp. ANA-3	Bacteria; Proteobacteria; Gammaproteobacteria	NC_008577	50437	50952	0	1	4	carbonic anhydrase	16S ribosomal RNA					+
Shewanella sp. ANA-3	Bacteria; Proteobacteria; Gammaproteobacteria	NC_008577	215246	215880	0	1	4	RNP-1-like RNA-binding protein	16S ribosomal RNA					+
Pelobacter propionicus DSM 2379	Bacteria; Proteobacteria; Deltaproteobacteria	NC_008609	2887988	2888404	0	1	2	16S ribosomal RNA	extracellular solute-binding protein					+
Pelobacter propionicus DSM 2379	Bacteria; Proteobacteria; Deltaproteobacteria	NC_008609	3336262	3336692	0	2	2	16S ribosomal RNA	RpoD family RNA polymerase sigma factor					+
Shewanella amazonensis SB2B	Bacteria; Proteobacteria; Gammaproteobacteria	NC_008700	435563	436075	0	3	1	preprotein translocase subunit SecA	16S ribosomal RNA					+
Shewanella amazonensis SB2B	Bacteria; Proteobacteria; Gammaproteobacteria	NC_008700	3112210	3112728	0	2	1	16S ribosomal RNA	CDP-diacylglycerol--serine O-phosphatidyltransferase					+
Shewanella amazonensis SB2B	Bacteria; Proteobacteria; Gammaproteobacteria	NC_008700	4282130	4282601	0	1	1	16S ribosomal RNA	iron-sulfur cluster-binding protein					+
Psychromonas ingrahamii 37	Bacteria; Proteobacteria; Gammaproteobacteria	NC_008709	740237	740890	0	1	1	ATP-dependent helicase HepA	16S ribosomal RNA					+
Burkholderia mallei SAVP1	Bacteria; Proteobacteria; Betaproteobacteria	NC_008784	1734838	535	0	3	3	hypothetical protein	16S ribosomal RNA					+
Burkholderia mallei SAVP1	Bacteria; Proteobacteria; Betaproteobacteria	NC_008785	1146650	1147285	0	2	1	hypothetical protein	16S ribosomal RNA					+
Burkholderia mallei NCTC 10229	Bacteria; Proteobacteria; Betaproteobacteria	NC_008835	973014	973590	0	1	4	16S ribosomal RNA	enoyl-CoA hydratase					+
Burkholderia mallei NCTC 10229	Bacteria; Proteobacteria; Betaproteobacteria	NC_008836	723892	724527	0	1	2	16S ribosomal RNA	hypothetical protein					+
Burkholderia mallei NCTC 10229	Bacteria; Proteobacteria; Betaproteobacteria	NC_008836	2013731	2014277	0	3	1	putative lipase/acylhydrolase	16S ribosomal RNA					+
Shewanella baltica OS155	Bacteria; Proteobacteria; Gammaproteobacteria	NC_009052	1168299	1169036	0	2	4	CDP-diacylglycerol--serine O-phosphatidyltransferase	16S ribosomal RNA					+
Shewanella baltica OS155	Bacteria; Proteobacteria; Gammaproteobacteria	NC_009052	3088431	3089045	0	5	4	16S ribosomal RNA	D,D-heptose 1,7-bisphosphate phosphatase					+
Shewanella baltica OS155	Bacteria; Proteobacteria; Gammaproteobacteria	NC_009052	4889143	4889809	0	1	1	16S ribosomal RNA	RNP-1 like RNA-binding protein					+
Burkholderia pseudomallei 668	Bacteria; Proteobacteria; Betaproteobacteria	NC_009074	1294941	1295554	0	7	2	hypothetical protein	16S ribosomal RNA					+
Burkholderia pseudomallei 668	Bacteria; Proteobacteria; Betaproteobacteria	NC_009075	557792	558376	0	2	3	hypothetical protein	16S ribosomal RNA					+
Burkholderia pseudomallei 1106a	Bacteria; Proteobacteria; Betaproteobacteria	NC_009078	484541	485155	0	1	1	hypothetical protein	16S ribosomal RNA					+
Burkholderia mallei NCTC 10247	Bacteria; Proteobacteria; Betaproteobacteria	NC_009080	3482811	3483331	0	1	1	GDSL-like lipase/acylhydrolase domain-containing protein	16S ribosomal RNA					+
Shewanella loihica PV-4	Bacteria; Proteobacteria; Gammaproteobacteria	NC_009092	2756881	2757543	0	2	1	16S ribosomal RNA	D,D-heptose 1,7-bisphosphate phosphatase					+
Shewanella loihica PV-4	Bacteria; Proteobacteria; Gammaproteobacteria	NC_009092	3489303	3490136	0	4	5	16S ribosomal RNA	CDP-diacylglycerol--serine O-phosphatidyltransferase					+
Shewanella loihica PV-4	Bacteria; Proteobacteria; Gammaproteobacteria	NC_009092	4539963	4540594	0	1	1	16S ribosomal RNA	4Fe-4S ferredoxin iron-sulfur binding domain-containing protein					+
Shewanella putrefaciens CN-32	Bacteria; Proteobacteria; Gammaproteobacteria	NC_009438	372291	373080	0	1	5	DNA binding domain-containing protein	16S ribosomal RNA					+
Shewanella pealeana ATCC 700345	Bacteria; Proteobacteria; Gammaproteobacteria	NC_009901	50175	51500	0	5	9	5S ribosomal RNA	16S ribosomal RNA					+
Shewanella baltica OS195	Bacteria; Proteobacteria; Gammaproteobacteria	NC_009997	481740	482457	0	1	2	preprotein translocase subunit SecA	16S ribosomal RNA					+
Shewanella baltica OS195	Bacteria; Proteobacteria; Gammaproteobacteria	NC_009997	1325585	1326342	0	2	1	CDP-diacylglycerol--serine O-phosphatidyltransferase	16S ribosomal RNA					+
Burkholderia multivorans ATCC 17616	Bacteria; Proteobacteria; Betaproteobacteria	NC_010086	323005	323520	0	6	3	HD phosphohydrolase-like protein	16S ribosomal RNA					+
Thermoanaerobacter sp. X514	Bacteria; Firmicutes; Clostridia	NC_010320	43652	44023	0	1	3	hypothetical protein	16S ribosomal RNA					+
Pseudomonas putida GB-1	Bacteria; Proteobacteria; Gammaproteobacteria	NC_010322	5221489	5221995	0	5	3	16S ribosomal RNA	putative sulfite oxidase subunit YedZ					+
Yersinia pseudotuberculosis YPIII	Bacteria; Proteobacteria; Gammaproteobacteria	NC_010465	3673554	3674076	0	1	1	16S ribosomal RNA	protein disaggregation chaperone					+
Pseudomonas putida W619	Bacteria; Proteobacteria; Gammaproteobacteria	NC_010501	3780949	3781566	0	4	1	16S ribosomal RNA	hypothetical protein					+
Pseudomonas putida W619	Bacteria; Proteobacteria; Gammaproteobacteria	NC_010501	5621795	5622369	0	2	2	16S ribosomal RNA	L-carnitine dehydratase/bile acid-inducible protein F					+
Burkholderia cenocepacia MC0-3	Bacteria; Proteobacteria; Betaproteobacteria	NC_010508	45083	45667	0	2	3	16S ribosomal RNA	cytochrome B561					+
Burkholderia cenocepacia MC0-3	Bacteria; Proteobacteria; Betaproteobacteria	NC_010508	344375	344947	0	4	2	GDSL family lipase	16S ribosomal RNA					+
Burkholderia cenocepacia MC0-3	Bacteria; Proteobacteria; Betaproteobacteria	NC_010508	561148	561722	0	1	1	enoyl-CoA hydratase	16S ribosomal RNA					+
Burkholderia cenocepacia MC0-3	Bacteria; Proteobacteria; Betaproteobacteria	NC_010508	2514045	2514620	0	4	2	16S ribosomal RNA	hypothetical protein					+
Burkholderia cenocepacia MC0-3	Bacteria; Proteobacteria; Betaproteobacteria	NC_010515	2010000	2010516	0	4	4	HD phosphohydrolase-like protein	16S ribosomal RNA					+
Burkholderia ambifaria MC40-6	Bacteria; Proteobacteria; Betaproteobacteria	NC_010551	298343	298924	0	2	1	GDSL family lipase	16S ribosomal RNA					+
Burkholderia ambifaria MC40-6	Bacteria; Proteobacteria; Betaproteobacteria	NC_010552	2379325	2379844	0	1	2	16S ribosomal RNA	HD phosphohydrolase-like protein					+
Burkholderia ambifaria MC40-6	Bacteria; Proteobacteria; Betaproteobacteria	NC_010557	247831	248534	0	2	2	16S ribosomal RNA	hypothetical protein					+
Burkholderia phymatum STM815	Bacteria; Proteobacteria; Betaproteobacteria	NC_010622	3207676	3208126	0	4	2	16S ribosomal RNA	GDSL family lipase					+
Burkholderia phytofirmans PsJN	Bacteria; Proteobacteria; Betaproteobacteria	NC_010681	4101710	4102217	0	1	1	16S ribosomal RNA	lipolytic protein G-D-S-L family					+
Ralstonia pickettii 12J	Bacteria; Proteobacteria; Betaproteobacteria	NC_010682	3263503	3264123	0	1	3	16S ribosomal RNA	enoyl-CoA hydratase					+
Ralstonia pickettii 12J	Bacteria; Proteobacteria; Betaproteobacteria	NC_010682	3478809	3479313	0	3	2	16S ribosomal RNA	CHAD domain containing protein					+
Stenotrophomonas maltophilia R551-3	Bacteria; Proteobacteria; Gammaproteobacteria	NC_011071	4507322	4507829	0	3	3	16S ribosomal RNA	5S ribosomal RNA					+
Salmonella enterica subsp. enterica serovar Newport str. SL254	Bacteria; Proteobacteria; Gammaproteobacteria	NC_011080	2804179	2804640	0	2	1	16S ribosomal RNA	protein disaggregation chaperone					+
Salmonella enterica subsp. enterica serovar Newport str. SL254	Bacteria; Proteobacteria; Gammaproteobacteria	NC_011080	4065936	4066422	0	1	1	GntR family transcriptional regulator	16S ribosomal RNA					+
Salmonella enterica subsp. enterica serovar Newport str. SL254	Bacteria; Proteobacteria; Gammaproteobacteria	NC_011080	4160420	4160803	0	1	1	protoporphyrinogen oxidase	16S ribosomal RNA					+
Salmonella enterica subsp. enterica serovar Heidelberg str. SL476	Bacteria; Proteobacteria; Gammaproteobacteria	NC_011083	4347556	4347941	0	2	1	glutamate racemase	16S ribosomal RNA					+
Salmonella enterica subsp. enterica serovar Schwarzengrund str. CVM19633	Bacteria; Proteobacteria; Gammaproteobacteria	NC_011094	2754318	2754661	0	2	1	16S ribosomal RNA	hypothetical protein					+
Salmonella enterica subsp. enterica serovar Schwarzengrund str. CVM19633	Bacteria; Proteobacteria; Gammaproteobacteria	NC_011094	3975682	3976168	0	1	1	transcriptional regulator, GntR family	16S ribosomal RNA					+
Salmonella enterica subsp. enterica serovar Schwarzengrund str. CVM19633	Bacteria; Proteobacteria; Gammaproteobacteria	NC_011094	4074064	4074447	0	1	1	protoporphyrinogen oxidase	16S ribosomal RNA					+
Salmonella enterica subsp. enterica serovar Schwarzengrund str. CVM19633	Bacteria; Proteobacteria; Gammaproteobacteria	NC_011094	4260058	4260688	0	3	3	bifunctional phosphoribosylaminoimidazolecarboxamide formyltransferase/IMP cyclohydrolase	16S ribosomal RNA					+
Salmonella enterica subsp. enterica serovar Dublin str. CT_02021853	Bacteria; Proteobacteria; Gammaproteobacteria	NC_011205	4128227	4128713	0	3	1	GntR family transcriptional regulator	16S ribosomal RNA					+
Salmonella enterica subsp. enterica serovar Dublin str. CT_02021853	Bacteria; Proteobacteria; Gammaproteobacteria	NC_011205	4222680	4223063	0	1	1	protoporphyrinogen oxidase	16S ribosomal RNA					+
Salmonella enterica subsp. enterica serovar Dublin str. CT_02021853	Bacteria; Proteobacteria; Gammaproteobacteria	NC_011205	4381823	4382208	0	3	1	glutamate racemase	16S ribosomal RNA					+
Thauera sp. MZ1T	Bacteria; Proteobacteria; Betaproteobacteria	NC_011662	3501404	3502421	0	1	4	16S ribosomal RNA	glycine cleavage system aminomethyltransferase T					+
Shewanella baltica OS223	Bacteria; Proteobacteria; Gammaproteobacteria	NC_011663	274653	275596	0	15	6	DNA binding domain protein, excisionase family	16S ribosomal RNA					+
Shewanella baltica OS223	Bacteria; Proteobacteria; Gammaproteobacteria	NC_011663	976959	977878	0	1	6	Carbamoyl-phosphate synthase L chain ATP-binding	16S ribosomal RNA					+
Shewanella baltica OS223	Bacteria; Proteobacteria; Gammaproteobacteria	NC_011663	2015219	2015839	0	1	5	D,D-heptose 1,7-bisphosphate phosphatase	16S ribosomal RNA					+
Desulfovibrio desulfuricans subsp. desulfuricans str. ATCC 27774	Bacteria; Proteobacteria; Deltaproteobacteria	NC_011883	2042962	2043377	0	1	1	16S ribosomal RNA	hypothetical protein					+
Azotobacter vinelandii DJ	Bacteria; Proteobacteria; Gammaproteobacteria	NC_012560	1908758	1909228	0	1	2	heat shock protein 90	16S ribosomal RNA					+
Ralstonia pickettii 12D	Bacteria; Proteobacteria; Betaproteobacteria	NC_012856	2913466	2914083	0	2	2	16S ribosomal RNA	enoyl-CoA hydratase					+
Ralstonia pickettii 12D	Bacteria; Proteobacteria; Betaproteobacteria	NC_012856	3140164	3140493	0	2	2	16S ribosomal RNA	CHAD domain containing protein					+
Ralstonia pickettii 12D	Bacteria; Proteobacteria; Betaproteobacteria	NC_012857	1285272	1285909	0	4	2	16S ribosomal RNA	pseudogene					+
Eggerthella lenta DSM 2243	Bacteria; Actinobacteria; Coriobacteridae	NC_013204	749359	749855	0	1	2	hypothetical protein	16S ribosomal RNA					+
Eggerthella lenta DSM 2243	Bacteria; Actinobacteria; Coriobacteridae	NC_013204	3273735	3274385	0	1	3	16S ribosomal RNA	chaperonin GroEL					+
Ammonifex degensii KC4	Bacteria; Firmicutes; Clostridia	NC_013385	1683922	1684197	0	1	1	16S ribosomal RNA	sporulation protein YunB					+
Vibrio sp. Ex25	Bacteria; Proteobacteria; Gammaproteobacteria	NC_013456	394185	394645	0	1	1	16S ribosomal RNA	protoporphyrinogen IX oxidase oxygen-independent HemG					+
Vibrio sp. Ex25	Bacteria; Proteobacteria; Gammaproteobacteria	NC_013456	476122	476622	0	1	1	carbonic anhydrase family 3	16S ribosomal RNA					+
Vibrio sp. Ex25	Bacteria; Proteobacteria; Gammaproteobacteria	NC_013456	518083	518575	0	2	4	NAD(P)H-flavin reductase (NAD(P)H:flavin oxidoreductase)	16S ribosomal RNA					+
Vibrio sp. Ex25	Bacteria; Proteobacteria; Gammaproteobacteria	NC_013456	577209	578048	0	2	4	RNA-binding protein	16S ribosomal RNA					+
Vibrio sp. Ex25	Bacteria; Proteobacteria; Gammaproteobacteria	NC_013456	804477	805065	0	1	1	phosphoadenylyl-sulfate reductase (thioredoxin)	16S ribosomal RNA					+
Vibrio sp. Ex25	Bacteria; Proteobacteria; Gammaproteobacteria	NC_013456	3094530	3095042	0	4	2	16S ribosomal RNA	ClpB protein					+
Escherichia coli DH1	Bacteria; Proteobacteria; Gammaproteobacteria	CP001637	3067594	3068171	0	3	1	excinuclease ABC, B subunit	dethiobiotin synthase					-
Chlamydia muridarum Nigg	Bacteria; Chlamydiae; Chlamydiales	NC_002620	50286	51019	0	1	3	serine/threonine-protein kinase	type III secretion protein SctC					-
Chlamydia muridarum Nigg	Bacteria; Chlamydiae; Chlamydiales	NC_002620	635027	635246	0	3	3	prolipoprotein diacylglyceryl transferase	hypothetical protein					-
Pseudomonas putida KT2440	Bacteria; Proteobacteria; Gammaproteobacteria	NC_002947	376723	377323	0	2	3	electron transfer flavoprotein, beta subunit, putative	hypothetical protein					-
Pseudomonas putida KT2440	Bacteria; Proteobacteria; Gammaproteobacteria	NC_002947	1279994	1281214	0	5	3	hypothetical protein	recombinase-related protein					-
Pseudomonas putida KT2440	Bacteria; Proteobacteria; Gammaproteobacteria	NC_002947	1883664	1884608	0	5	3	hypothetical protein	Sel1 domain protein repeat-containing protein					-
Treponema denticola ATCC 35405	Bacteria; Spirochaetes; Spirochaetales	NC_002967	947725	947986	0	3	1	ABC transporter, ATP-binding/permease protein	peptidase T					-
Treponema denticola ATCC 35405	Bacteria; Spirochaetes; Spirochaetales	NC_002967	1005491	1005635	0	1	1	asparaginyl-tRNA synthetase	hypothetical protein					-
Treponema denticola ATCC 35405	Bacteria; Spirochaetes; Spirochaetales	NC_002967	1057095	1057240	0	1	1	hypothetical protein	50S ribosomal protein L32					-
Treponema denticola ATCC 35405	Bacteria; Spirochaetes; Spirochaetales	NC_002967	1634011	1634172	0	1	2	hypothetical protein	aspartyl-tRNA synthetase					-
Treponema denticola ATCC 35405	Bacteria; Spirochaetes; Spirochaetales	NC_002967	1804233	1804411	0	1	3	50S ribosomal protein L21	ISTde2, transposase					-
Treponema denticola ATCC 35405	Bacteria; Spirochaetes; Spirochaetales	NC_002967	1914108	1914252	0	2	1	GTP-binding protein LepA	ferredoxin					-
Treponema denticola ATCC 35405	Bacteria; Spirochaetes; Spirochaetales	NC_002967	2713368	2713513	0	1	1	hypothetical protein	hypothetical protein					-
Wolbachia endosymbiont of Drosophila melanogaster	Bacteria; Proteobacteria; Alphaproteobacteria	NC_002978	546998	547730	0	45	10	NADH dehydrogenase subunit D	transposase, truncation					-
Ralstonia solanacearum GMI1000	Bacteria; Proteobacteria; Betaproteobacteria	NC_003295	1725928	1726313	0	1	1	hypothetical protein	hypothetical protein					-
Bacillus cereus ATCC 10987	Bacteria; Firmicutes; Bacillales	NC_003909	1130087	1130314	0	1	1	glycerol uptake operon antiterminator regulatory protein	glycerol uptake facilitator protein					-
Bacillus cereus ATCC 10987	Bacteria; Firmicutes; Bacillales	NC_003909	1577995	1578291	0	1	1	ferredoxin	hypothetical protein					-
Bacillus cereus ATCC 10987	Bacteria; Firmicutes; Bacillales	NC_003909	3431879	3432072	0	2	2	anti-terminator HutP	hypothetical protein					-
Bacillus cereus ATCC 10987	Bacteria; Firmicutes; Bacillales	NC_003909	5028776	5029162	0	1	1	PTS system, glucose-specific IIA component, putative	hypothetical protein					-
Streptococcus agalactiae 2603V/R	Bacteria; Firmicutes; Lactobacillales	NC_004116	76083	76287	0	1	1	MATE efflux family protein	30S ribosomal protein S10					-
Pseudomonas syringae pv. tomato str. DC3000	Bacteria; Proteobacteria; Gammaproteobacteria	NC_004578	1892607	1893123	0	1	1	hypothetical protein	hypothetical protein					-
Pseudomonas syringae pv. tomato str. DC3000	Bacteria; Proteobacteria; Gammaproteobacteria	NC_004578	4401891	4402329	0	1	3	hypothetical protein	peptidyl-prolyl cis-trans isomerase, FKBP-type					-
Bacillus anthracis str. Sterne	Bacteria; Firmicutes; Bacillales	NC_005945	1108422	1108772	0	4	2	trifolitoxin immunity domain-containing protein	cold shock protein CspA					-
Bacillus anthracis str. Sterne	Bacteria; Firmicutes; Bacillales	NC_005945	3392258	3392380	0	1	1	bioY family protein	medium-chain-fatty-acid--CoA ligase					-
Bacillus anthracis str. Sterne	Bacteria; Firmicutes; Bacillales	NC_005945	3745480	3745540	0	1	1	50S ribosomal protein L32	hypothetical protein					-
Bacillus anthracis str. Sterne	Bacteria; Firmicutes; Bacillales	NC_005945	3856809	3857231	0	3	1	hypothetical protein	EmrB/QacA family drug resistance transporter					-
Bacillus cereus E33L	Bacteria; Firmicutes; Bacillales	NC_006274	617798	617951	0	2	2	iron(III) dicitrate ABC transporter, periplasmic protein	iron compound ABC transporter, permease					-
Bacillus cereus E33L	Bacteria; Firmicutes; Bacillales	NC_006274	1233429	1233719	0	1	2	sodium/proline symporter; osmoregulated proline transporter	group-specific protein					-
Bacillus cereus E33L	Bacteria; Firmicutes; Bacillales	NC_006274	2305982	2306372	0	2	1	cold shock protein	CAAX amino terminal protease family protein					-
Bacillus cereus E33L	Bacteria; Firmicutes; Bacillales	NC_006274	4296395	4296559	0	3	4	50S ribosomal protein L21	ribonuclease					-
Bacillus cereus E33L	Bacteria; Firmicutes; Bacillales	NC_006274	5119522	5119908	0	3	1	protein-N(pi)-phosphohistidine-sugar phosphotransferase, PTS system, IIA component	hypothetical protein					-
Pseudomonas syringae pv. syringae B728a	Bacteria; Proteobacteria; Gammaproteobacteria	NC_007005	3472704	3473199	0	3	2	lipoprotein	hypothetical protein					-
Pseudomonas syringae pv. syringae B728a	Bacteria; Proteobacteria; Gammaproteobacteria	NC_007005	4353607	4354247	0	2	3	hypothetical protein	hypothetical protein					-
Pseudomonas syringae pv. syringae B728a	Bacteria; Proteobacteria; Gammaproteobacteria	NC_007005	5827888	5828182	0	6	2	hypothetical protein	hypothetical protein					-
Bacillus cereus E33L	Bacteria; Firmicutes; Bacillales	NC_007103	379990	380882	0	12	1	methyl-accepting chemotaxis protein	F0F1 ATP synthase subunit alpha					-
Psychrobacter arcticus 273-4	Bacteria; Proteobacteria; Gammaproteobacteria	NC_007204	244573	244974	0	8	2	RNA polymerase sigma-54 factor family protein	SSU ribosomal protein S30P / sigma 54 modulation protein					-
Dechloromonas aromatica RCB	Bacteria; Proteobacteria; Betaproteobacteria	NC_007298	929195	929465	0	1	2	hypothetical protein	CBS					-
Dechloromonas aromatica RCB	Bacteria; Proteobacteria; Betaproteobacteria	NC_007298	1642937	1643343	0	5	1	hypothetical protein	oxidoreductase FAD/NAD(P)-binding:oxidoreductase FAD-binding region					-
Dechloromonas aromatica RCB	Bacteria; Proteobacteria; Betaproteobacteria	NC_007298	3104557	3104998	0	4	2	bifunctional aconitate hydratase 2/2-methylisocitrate dehydratase	chemotaxis sensory transducer					-
Ralstonia eutropha JMP134	Bacteria; Proteobacteria; Betaproteobacteria	NC_007347	2521461	2521715	0	5	1	FAD-dependent pyridine nucleotide-disulphide oxidoreductase	tRNA-Asn					-
Methanosarcina barkeri str. Fusaro	Archaea; Euryarchaeota; Methanomicrobia	NC_007355	1102114	1102481	0	3	6	ArsR family transcriptional regulator	hypothetical protein					-
Thiobacillus denitrificans ATCC 25259	Bacteria; Proteobacteria; Betaproteobacteria	NC_007404	603321	603455	0	1	1	rhodanese-like protein	hypothetical protein					-
Thiobacillus denitrificans ATCC 25259	Bacteria; Proteobacteria; Betaproteobacteria	NC_007404	2131746	2132165	0	5	3	leucyl/phenylalanyl-tRNA--protein transferase	heavy metal translocating P-type ATPase					-
Anabaena variabilis ATCC 29413	Bacteria; Cyanobacteria; Nostocales	NC_007413	5391316	5391502	0	1	1	hypothetical protein	30S ribosomal protein S4					-
Burkholderia pseudomallei 1710b	Bacteria; Proteobacteria; Betaproteobacteria	NC_007435	2266203	2266847	0	1	1	hypothetical protein	hypothetical protein					-
Burkholderia pseudomallei 1710b	Bacteria; Proteobacteria; Betaproteobacteria	NC_007435	2549854	2550403	0	4	1	hypothetical protein	rhamnosyltransferase 1, subunit A					-
Nitrosococcus oceani ATCC 19707	Bacteria; Proteobacteria; Gammaproteobacteria	NC_007484	818068	818527	0	2	1	glycosyl transferase, group 1	cytochrome c, class I					-
Nitrosococcus oceani ATCC 19707	Bacteria; Proteobacteria; Gammaproteobacteria	NC_007484	1969677	1969907	0	1	1	hydroxyacylglutathione hydrolase	hypothetical protein					-
Nitrosococcus oceani ATCC 19707	Bacteria; Proteobacteria; Gammaproteobacteria	NC_007484	2367938	2368133	0	1	1	transaldolase	hypothetical protein					-
Nitrosococcus oceani ATCC 19707	Bacteria; Proteobacteria; Gammaproteobacteria	NC_007484	2853231	2853934	0	2	1	multicopper oxidase, type 3	stage V sporulation-like protein, SpoVR					-
Nitrosococcus oceani ATCC 19707	Bacteria; Proteobacteria; Gammaproteobacteria	NC_007484	2963725	2964159	0	1	1	peptidase M24	cold-shock protein, DNA-binding					-
Pseudomonas fluorescens Pf0-1	Bacteria; Proteobacteria; Gammaproteobacteria	NC_007492	4536380	4536950	0	4	1	hypothetical protein	outer membrane lipoprotein OprI					-
Pseudomonas fluorescens Pf0-1	Bacteria; Proteobacteria; Gammaproteobacteria	NC_007492	5873136	5874129	0	2	2	glucose-methanol-choline oxidoreductase	electron transfer flavoprotein subunit beta					-
Pelobacter carbinolicus DSM 2380	Bacteria; Proteobacteria; Deltaproteobacteria	NC_007498	835251	835369	0	1	1	tRNA-Thr	elongation factor Tu					-
Pelobacter carbinolicus DSM 2380	Bacteria; Proteobacteria; Deltaproteobacteria	NC_007498	907159	907458	0	3	1	putative ornithine cyclodeaminase	two component signal transduction response regulator					-
Pelobacter carbinolicus DSM 2380	Bacteria; Proteobacteria; Deltaproteobacteria	NC_007498	2586423	2586582	0	3	1	CBS domain-containing protein	DNA ligase, NAD-dependent					-
Pelobacter carbinolicus DSM 2380	Bacteria; Proteobacteria; Deltaproteobacteria	NC_007498	2948855	2949200	0	1	2	alcohol dehydrogenase, class IV	putative carboxymuconolactone decarboxylase					-
Burkholderia sp. 383	Bacteria; Proteobacteria; Betaproteobacteria	NC_007510	551893	552069	0	2	1	tRNA-Pro	trans-hexaprenyltranstransferase					-
Burkholderia sp. 383	Bacteria; Proteobacteria; Betaproteobacteria	NC_007510	1146597	1146698	0	1	1	tRNA-Asn	4Fe-4S ferredoxin					-
Chlorobium luteolum DSM 273	Bacteria; Chlorobi; Chlorobia	NC_007512	161364	161547	0	1	1	cytochrome c-555	cytochrome c-555, membrane-bound					-
Chlorobium luteolum DSM 273	Bacteria; Chlorobi; Chlorobia	NC_007512	1162439	1162596	0	1	2	peptidase S41A, C-terminal protease	RNA recognition motif-containing protein					-
Geobacter metallireducens GS-15	Bacteria; Proteobacteria; Deltaproteobacteria	NC_007517	147351	147558	0	5	1	hydrogenase accessory protein HypB	cytochrome c family protein, putative					-
Geobacter metallireducens GS-15	Bacteria; Proteobacteria; Deltaproteobacteria	NC_007517	676987	677087	0	2	2	tRNA pseudouridine synthase A	50S ribosomal protein L13					-
Geobacter metallireducens GS-15	Bacteria; Proteobacteria; Deltaproteobacteria	NC_007517	2124367	2124731	0	2	2	carbon-monoxide dehydrogenase, catalytic subunit	sulphate transport system permease protein 1					-
Geobacter metallireducens GS-15	Bacteria; Proteobacteria; Deltaproteobacteria	NC_007517	2335593	2335776	0	1	1	Acyl-CoA dehydrogenase-like	formate dehydrogenase, subunit FdhD					-
Geobacter metallireducens GS-15	Bacteria; Proteobacteria; Deltaproteobacteria	NC_007517	2424243	2424765	0	2	8	electron transfer flavoprotein subunit beta	twin-arginine translocation pathway signal					-
Geobacter metallireducens GS-15	Bacteria; Proteobacteria; Deltaproteobacteria	NC_007517	2631729	2631841	0	1	1	50S ribosomal protein L28	endoribonuclease L-PSP					-
Geobacter metallireducens GS-15	Bacteria; Proteobacteria; Deltaproteobacteria	NC_007517	2863898	2864108	0	1	3	nitrite and sulphite reductase 4Fe-4S region	elongation factor G					-
Geobacter metallireducens GS-15	Bacteria; Proteobacteria; Deltaproteobacteria	NC_007517	2969481	2969744	0	2	4	hypothetical protein	hypothetical protein					-
Geobacter metallireducens GS-15	Bacteria; Proteobacteria; Deltaproteobacteria	NC_007517	3213074	3213320	0	1	1	hypothetical protein	hydroxylamine reductase					-
Geobacter metallireducens GS-15	Bacteria; Proteobacteria; Deltaproteobacteria	NC_007517	3218279	3218582	0	2	2	pseudouridine synthase, RluD	cytochrome c family protein					-
Geobacter metallireducens GS-15	Bacteria; Proteobacteria; Deltaproteobacteria	NC_007517	3604755	3604841	0	1	1	TraR/DksA family transcriptional regulator	hypothetical protein					-
Desulfovibrio desulfuricans subsp. desulfuricans str. G20	Bacteria; Proteobacteria; Deltaproteobacteria	NC_007519	124448	124730	0	1	7	permease, putative	bacterioferritin					-
Desulfovibrio desulfuricans subsp. desulfuricans str. G20	Bacteria; Proteobacteria; Deltaproteobacteria	NC_007519	2530736	2531087	0	1	1	hypothetical protein	hypothetical protein					-
Desulfovibrio desulfuricans subsp. desulfuricans str. G20	Bacteria; Proteobacteria; Deltaproteobacteria	NC_007519	3183589	3183731	0	1	1	hypothetical protein	desulfoferrodoxin					-
Desulfovibrio desulfuricans subsp. desulfuricans str. G20	Bacteria; Proteobacteria; Deltaproteobacteria	NC_007519	3597032	3597267	0	2	1	tolB protein, putative	peptidoglycan-associated lipoprotein, putative					-
Thiomicrospira crunogena XCL-2	Bacteria; Proteobacteria; Gammaproteobacteria	NC_007520	1243671	1243985	0	2	2	tRNA-Leu	hypothetical protein					-
Thiomicrospira crunogena XCL-2	Bacteria; Proteobacteria; Gammaproteobacteria	NC_007520	1779246	1779438	0	1	2	heat shock protein HtpX	aspartyl/glutamyl-tRNA amidotransferase subunit B					-
Thiomicrospira crunogena XCL-2	Bacteria; Proteobacteria; Gammaproteobacteria	NC_007520	2355426	2355682	0	1	1	flagellar protein FliS	sigma 32 (RpoH)					-
Bacillus anthracis str. 'Ames Ancestor'	Bacteria; Firmicutes; Bacillales	NC_007530	3856436	3856858	0	3	1	hypothetical protein	EmrB/QacA family drug resistance transporter					-
Sulfurimonas denitrificans DSM 1251	Bacteria; Proteobacteria; Epsilonproteobacteria	NC_007575	236480	236706	0	1	1	hypothetical protein	hypothetical protein					-
Sulfurimonas denitrificans DSM 1251	Bacteria; Proteobacteria; Epsilonproteobacteria	NC_007575	1727135	1727314	0	1	1	hypothetical protein	GrpE protein					-
Sulfurimonas denitrificans DSM 1251	Bacteria; Proteobacteria; Epsilonproteobacteria	NC_007575	2042457	2042945	0	1	1	hypothetical protein	hypothetical protein					-
Nitrosospira multiformis ATCC 25196	Bacteria; Proteobacteria; Betaproteobacteria	NC_007614	193729	194764	0	10	3	hypothetical protein	cytochrome c oxidase, subunit II					-
Nitrosospira multiformis ATCC 25196	Bacteria; Proteobacteria; Betaproteobacteria	NC_007614	1191043	1191374	0	2	2	MotA/TolQ/ExbB proton channel	exodeoxyribonuclease VII large subunit					-
Nitrosospira multiformis ATCC 25196	Bacteria; Proteobacteria; Betaproteobacteria	NC_007614	1247780	1248067	0	1	3	hypothetical protein	hydroxylamine oxidase					-
Nitrosospira multiformis ATCC 25196	Bacteria; Proteobacteria; Betaproteobacteria	NC_007614	3060992	3062154	0	2	4	cytochrome c oxidase, subunit II	asparagine synthase, glutamine-hydrolyzing					-
Rhodospirillum rubrum ATCC 11170	Bacteria; Proteobacteria; Alphaproteobacteria	NC_007643	4154190	4154680	0	5	2	hypothetical protein	uroporphyrinogen decarboxylase					-
Moorella thermoacetica ATCC 39073	Bacteria; Firmicutes; Clostridia	NC_007644	47176	47362	0	1	7	AbrB family transcriptional regulator	methionyl-tRNA synthetase					-
Moorella thermoacetica ATCC 39073	Bacteria; Firmicutes; Clostridia	NC_007644	133294	133437	0	4	1	hydroxylamine reductase	pseudogene					-
Moorella thermoacetica ATCC 39073	Bacteria; Firmicutes; Clostridia	NC_007644	223349	223727	0	7	2	phosphoribosyltransferase	cold-shock DNA-binding protein family protein					-
Moorella thermoacetica ATCC 39073	Bacteria; Firmicutes; Clostridia	NC_007644	540723	540865	0	1	1	Ham1-like protein	tRNA-Gly					-
Moorella thermoacetica ATCC 39073	Bacteria; Firmicutes; Clostridia	NC_007644	2382491	2382737	0	1	1	GntR family transcriptional regulator	thymidine phosphorylase					-
Jannaschia sp. CCS1	Bacteria; Proteobacteria; Alphaproteobacteria	NC_007802	18654	19045	0	1	4	hypothetical protein	amino acid carrier protein					-
Rhodoferax ferrireducens T118	Bacteria; Proteobacteria; Betaproteobacteria	NC_007908	786212	786433	0	2	3	hypothetical protein	sigma 54 modulation protein/ribosomal protein S30EA					-
Rhodoferax ferrireducens T118	Bacteria; Proteobacteria; Betaproteobacteria	NC_007908	856505	856889	0	5	1	uroporphyrinogen decarboxylase	primosomal protein N'					-
Saccharophagus degradans 2-40	Bacteria; Proteobacteria; Gammaproteobacteria	NC_007912	1015965	1016255	0	2	1	arabinan endo-1,5-alpha-L-arabinosidase	Alpha-L-arabinofuranosidase					-
Saccharophagus degradans 2-40	Bacteria; Proteobacteria; Gammaproteobacteria	NC_007912	1244298	1244547	0	2	2	NAD(P) transhydrogenase, beta subunit	30S ribosomal protein S10					-
Saccharophagus degradans 2-40	Bacteria; Proteobacteria; Gammaproteobacteria	NC_007912	1295077	1295550	0	1	1	30S ribosomal protein S20	arabinan endo-1,5-alpha-L-arabinosidase					-
Saccharophagus degradans 2-40	Bacteria; Proteobacteria; Gammaproteobacteria	NC_007912	3350345	3350601	0	1	1	uroporphyrinogen decarboxylase HemE	glutamate synthase, NADH/NADPH, small subunit 2					-
Rhodopseudomonas palustris BisB18	Bacteria; Proteobacteria; Alphaproteobacteria	NC_007925	1085996	1086851	0	1	6	hypothetical protein	phage transcriptional regulator, AlpA					-
Methylobacillus flagellatus KT	Bacteria; Proteobacteria; Betaproteobacteria	NC_007947	465298	465760	0	4	3	alkaline phosphatase	FAD dependent oxidoreductase					-
Methylobacillus flagellatus KT	Bacteria; Proteobacteria; Betaproteobacteria	NC_007947	883241	883417	0	3	1	NolW-like protein	Lip					-
Methylobacillus flagellatus KT	Bacteria; Proteobacteria; Betaproteobacteria	NC_007947	1026273	1026449	0	3	1	NolW-like protein	Lip					-
Methylobacillus flagellatus KT	Bacteria; Proteobacteria; Betaproteobacteria	NC_007947	2052475	2053054	0	2	3	methylthioribose-1-phosphate isomerase	TatD-related deoxyribonuclease					-
Methylobacillus flagellatus KT	Bacteria; Proteobacteria; Betaproteobacteria	NC_007947	2330273	2330680	0	1	1	hypothetical protein	hypothetical protein					-
Methylobacillus flagellatus KT	Bacteria; Proteobacteria; Betaproteobacteria	NC_007947	2370156	2370348	0	1	1	50S ribosomal protein L21P	trans-hexaprenyltranstransferase					-
Polaromonas sp. JS666	Bacteria; Proteobacteria; Betaproteobacteria	NC_007948	2399258	2399652	0	3	1	diacylglycerol O-acyltransferase	phasin					-
Polaromonas sp. JS666	Bacteria; Proteobacteria; Betaproteobacteria	NC_007948	3256259	3256485	0	2	3	histone deacetylase superfamily protein	phasin					-
Burkholderia xenovorans LB400	Bacteria; Proteobacteria; Betaproteobacteria	NC_007951	2038487	2038921	0	1	2	hypothetical protein	pseudogene					-
Burkholderia xenovorans LB400	Bacteria; Proteobacteria; Betaproteobacteria	NC_007952	27990	28351	0	5	2	metal dependent phosphohydrolase	GntR family transcriptional regulator					-
Shewanella denitrificans OS217	Bacteria; Proteobacteria; Gammaproteobacteria	NC_007954	2123120	2124010	0	7	1	hypothetical protein	excinuclease ABC subunit B					-
Shewanella denitrificans OS217	Bacteria; Proteobacteria; Gammaproteobacteria	NC_007954	2533483	2534422	0	3	2	hypothetical protein	chitinase					-
Shewanella denitrificans OS217	Bacteria; Proteobacteria; Gammaproteobacteria	NC_007954	3904181	3904784	0	2	1	hypothetical protein	hypothetical protein					-
Shewanella denitrificans OS217	Bacteria; Proteobacteria; Gammaproteobacteria	NC_007954	4141921	4142196	0	2	1	spheroplast protein y precursor, putative	response regulator receiver					-
Methanococcoides burtonii DSM 6242	Archaea; Euryarchaeota; Methanomicrobia	NC_007955	1044171	1044264	0	1	4	lysine exporter protein LysE/YggA	transcription initiation factor IIB					-
Methanococcoides burtonii DSM 6242	Archaea; Euryarchaeota; Methanomicrobia	NC_007955	2521101	2521196	0	2	3	isopentenyl pyrophosphate isomerase	beta-lactamase-like protein					-
Chromohalobacter salexigens DSM 3043	Bacteria; Proteobacteria; Gammaproteobacteria	NC_007963	1386601	1387016	0	3	1	tRNA-Glu	citrate synthase					-
Chromohalobacter salexigens DSM 3043	Bacteria; Proteobacteria; Gammaproteobacteria	NC_007963	2070575	2071096	0	1	1	acetoacetyl-CoA synthetase	major facilitator transporter					-
Psychrobacter cryohalolentis K5	Bacteria; Proteobacteria; Gammaproteobacteria	NC_007969	275381	275772	0	1	4	30S ribosomal protein S21	hypothetical protein					-
Cupriavidus metallidurans CH34	Bacteria; Proteobacteria; Betaproteobacteria	NC_007973	571812	572769	0	3	2	MotA/TolQ/ExbB proton channel	exodeoxyribonuclease VII large subunit					-
Candidatus Koribacter versatilis Ellin345	Bacteria; Acidobacteria; Candidatus Koribacter.	NC_008009	1918347	1918745	0	2	1	peptidase M16-like	pilin, type IV, putative					-
Candidatus Koribacter versatilis Ellin345	Bacteria; Acidobacteria; Candidatus Koribacter.	NC_008009	4615742	4616517	0	1	1	hypothetical protein	tRNA-His					-
Deinococcus geothermalis DSM 11300	Bacteria; Deinococcus-Thermus; Deinococci	NC_008025	1463719	1463817	0	1	1	isopentenyl pyrophosphate isomerase	tRNA-Met					-
Burkholderia cenocepacia AU 1054	Bacteria; Proteobacteria; Betaproteobacteria	NC_008060	103300	103447	0	3	1	tRNA-Pro	trans-hexaprenyltranstransferase					-
Burkholderia cenocepacia AU 1054	Bacteria; Proteobacteria; Betaproteobacteria	NC_008060	1134357	1135032	0	7	1	hypothetical protein	Flp/Fap pilin component					-
Burkholderia cenocepacia AU 1054	Bacteria; Proteobacteria; Betaproteobacteria	NC_008061	2454970	2455337	0	2	3	RNA polymerase sigma factor	NADPH-dependent FMN reductase					-
Rubrobacter xylanophilus DSM 9941	Bacteria; Actinobacteria; Rubrobacteridae	NC_008148	1724116	1724249	0	1	1	hypothetical protein	GntR-like protein					-
Pseudoalteromonas atlantica T6c	Bacteria; Proteobacteria; Gammaproteobacteria	NC_008228	509670	509892	0	1	1	TolC family type I secretion outer membrane protein	nucleoside diphosphate pyrophosphatase					-
Pseudoalteromonas atlantica T6c	Bacteria; Proteobacteria; Gammaproteobacteria	NC_008228	3490639	3490923	0	1	1	aldehyde reductase	hypothetical protein					-
Clostridium perfringens ATCC 13124	Bacteria; Firmicutes; Clostridia	NC_008261	242826	243191	0	1	1	sensory box histidine kinase	acyltransferase family protein					-
Clostridium perfringens ATCC 13124	Bacteria; Firmicutes; Clostridia	NC_008261	3256064	410	0	3	3	50S ribosomal protein L34	chromosomal replication initiation protein					-
Clostridium perfringens SM101	Bacteria; Firmicutes; Clostridia	NC_008262	2617656	2618118	0	1	5	30S ribosomal protein S10	IS1470 transposase					-
Haemophilus somnus 129PT	Bacteria; Proteobacteria; Gammaproteobacteria	NC_008309	389058	389390	0	3	1	gluconate permease	gluconate kinase					-
Haemophilus somnus 129PT	Bacteria; Proteobacteria; Gammaproteobacteria	NC_008309	725069	725394	0	1	2	PTS system, glucitol/sorbitol-specific IIC2 component	2-octaprenyl-3-methyl-6-methoxy-1,4-benzoquinol hydroxylase					-
Haemophilus somnus 129PT	Bacteria; Proteobacteria; Gammaproteobacteria	NC_008309	1232440	1232661	0	2	1	phosphocarrier protein HPr	ribosome-associated GTPase					-
Haemophilus somnus 129PT	Bacteria; Proteobacteria; Gammaproteobacteria	NC_008309	1437253	1437617	0	1	2	mannitol-specific IIABC component, PTS system	fructokinase					-
Haemophilus somnus 129PT	Bacteria; Proteobacteria; Gammaproteobacteria	NC_008309	1456638	1456959	0	2	2	bifunctional aconitate hydratase 2/2-methylisocitrate dehydratase	ABC transporter, periplasmic binding protein					-
Trichodesmium erythraeum IMS101	Bacteria; Cyanobacteria; Oscillatoriales	NC_008312	3598707	3599248	0	1	1	gas vesicle synthesis protein GvpA	gas vesicle synthesis protein GvpA					-
Trichodesmium erythraeum IMS101	Bacteria; Cyanobacteria; Oscillatoriales	NC_008312	7287263	7288333	0	2	8	transposase	IS630 family transposase					-
Shewanella sp. MR-4	Bacteria; Proteobacteria; Gammaproteobacteria	NC_008321	307497	307802	0	1	2	TonB-dependent receptor	hypothetical protein					-
Shewanella sp. MR-7	Bacteria; Proteobacteria; Gammaproteobacteria	NC_008322	4407888	4407982	0	1	1	XRE family transcriptional regulator	rhodanese domain-containing protein					-
Shewanella frigidimarina NCIMB 400	Bacteria; Proteobacteria; Gammaproteobacteria	NC_008345	151547	151769	0	1	1	pantothenate kinase	tRNA-Thr					-
Shewanella frigidimarina NCIMB 400	Bacteria; Proteobacteria; Gammaproteobacteria	NC_008345	1135934	1136012	0	1	1	peptidase M48, Ste24p	peptidylprolyl isomerase, FKBP-type					-
Shewanella frigidimarina NCIMB 400	Bacteria; Proteobacteria; Gammaproteobacteria	NC_008345	4702872	4703402	0	1	1	isoprenoid biosynthesis protein with amidotransferase-like domain	DNA polymerase I					-
Syntrophomonas wolfei subsp. wolfei str. Goettingen	Bacteria; Firmicutes; Clostridia	NC_008346	655620	655703	0	2	1	pseudogene	hypothetical protein					-
Syntrophomonas wolfei subsp. wolfei str. Goettingen	Bacteria; Firmicutes; Clostridia	NC_008346	1987011	1987453	0	2	1	hypothetical protein	tRNA-Lys					-
Burkholderia ambifaria AMMD	Bacteria; Proteobacteria; Betaproteobacteria	NC_008390	547399	547544	0	1	1	tRNA-Pro	trans-hexaprenyltranstransferase					-
Burkholderia ambifaria AMMD	Bacteria; Proteobacteria; Betaproteobacteria	NC_008390	2291586	2291724	0	1	1	tRNA-Glu	tRNA-Ala					-
Burkholderia ambifaria AMMD	Bacteria; Proteobacteria; Betaproteobacteria	NC_008391	1977402	1977766	0	1	1	NADPH-dependent FMN reductase	RNA polymerase sigma factor					-
Pseudomonas aeruginosa UCBPP-PA14	Bacteria; Proteobacteria; Gammaproteobacteria	NC_008463	1095606	1095963	0	5	6	hypothetical protein	putative two-component response regulator					-
Pseudomonas aeruginosa UCBPP-PA14	Bacteria; Proteobacteria; Gammaproteobacteria	NC_008463	4590733	4591105	0	3	3	putative integrase	tRNA-Lys					-
Pseudomonas aeruginosa UCBPP-PA14	Bacteria; Proteobacteria; Gammaproteobacteria	NC_008463	5394853	5395025	0	4	3	hypothetical protein	hypothetical protein					-
Lactococcus lactis subsp. cremoris SK11	Bacteria; Firmicutes; Lactobacillales	NC_008527	162879	162976	0	1	1	membrane-associated serine protease	hypothetical protein					-
Lactococcus lactis subsp. cremoris SK11	Bacteria; Firmicutes; Lactobacillales	NC_008527	438286	438577	0	1	1	transcriptional regulator	cellobiose-specific PTS system IIC component					-
Lactococcus lactis subsp. cremoris SK11	Bacteria; Firmicutes; Lactobacillales	NC_008527	1095511	1095679	0	3	3	hypothetical protein	50S ribosomal protein L21					-
Lactococcus lactis subsp. cremoris SK11	Bacteria; Firmicutes; Lactobacillales	NC_008527	2048657	2048796	0	2	2	oxidoreductase	uracil phosphoribosyltransferase					-
Lactococcus lactis subsp. cremoris SK11	Bacteria; Firmicutes; Lactobacillales	NC_008527	2136126	2136260	0	1	4	50S ribosomal protein L11	hypothetical protein					-
Oenococcus oeni PSU-1	Bacteria; Firmicutes; Lactobacillales	NC_008528	747485	747548	0	1	1	hypothetical protein	SSU ribosomal protein S16P					-
Lactobacillus gasseri ATCC 33323	Bacteria; Firmicutes; Lactobacillales	NC_008530	746235	746405	0	4	1	50S ribosomal protein L28	hypothetical protein					-
Leuconostoc mesenteroides subsp. mesenteroides ATCC 8293	Bacteria; Firmicutes; Lactobacillales	NC_008531	572899	573044	0	1	2	threonine dehydrogenase related Zn-dependent dehydrogenase	LacI family transcription regulator					-
Leuconostoc mesenteroides subsp. mesenteroides ATCC 8293	Bacteria; Firmicutes; Lactobacillales	NC_008531	797287	797692	0	5	2	hypothetical protein	UspA family nucleotide-binding protein					-
Leuconostoc mesenteroides subsp. mesenteroides ATCC 8293	Bacteria; Firmicutes; Lactobacillales	NC_008531	1378435	1378647	0	1	2	glycerol uptake facilitator related permease (major Intrinsic protein family)	flavodoxin					-
Streptococcus thermophilus LMD-9	Bacteria; Firmicutes; Lactobacillales	NC_008532	59098	59332	0	5	2	response regulator	hypothetical protein					-
Streptococcus thermophilus LMD-9	Bacteria; Firmicutes; Lactobacillales	NC_008532	976155	976232	0	1	2	permease	pseudogene					-
Streptococcus thermophilus LMD-9	Bacteria; Firmicutes; Lactobacillales	NC_008532	1086226	1086361	0	1	1	histone-like DNA-binding protein	hypothetical protein					-
Streptococcus thermophilus LMD-9	Bacteria; Firmicutes; Lactobacillales	NC_008532	1359253	1359446	0	1	1	30S ribosomal protein S21	amino acid ABC transporter periplasmic protein					-
Streptococcus thermophilus LMD-9	Bacteria; Firmicutes; Lactobacillales	NC_008532	1363385	1363597	0	1	1	amino acid ABC transporter periplasmic protein	MutT/nudix family protein					-
Streptococcus thermophilus LMD-9	Bacteria; Firmicutes; Lactobacillales	NC_008532	1386829	1387052	0	4	1	septation ring formation regulator EzrA	DNA gyrase subunit B					-
Streptococcus thermophilus LMD-9	Bacteria; Firmicutes; Lactobacillales	NC_008532	1390715	1390865	0	3	2	putative effector of murein hydrolase LrgA	tRNA-Thr					-
Streptococcus thermophilus LMD-9	Bacteria; Firmicutes; Lactobacillales	NC_008532	1528289	1528408	0	2	1	glycerol uptake facilitator or related permease (major Intrinsic protein family)	x-prolyl-dipeptidyl aminopeptidase					-
Streptococcus thermophilus LMD-9	Bacteria; Firmicutes; Lactobacillales	NC_008532	1752051	1752197	0	1	1	fructose-bisphosphate aldolase	tRNA-Leu					-
Arthrobacter sp. FB24	Bacteria; Actinobacteria; Actinobacteridae	NC_008541	16876	17897	0	5	5	rhomboid family protein	DNA-3-methyladenine glycosylase I					-
Arthrobacter sp. FB24	Bacteria; Actinobacteria; Actinobacteridae	NC_008541	2036719	2036881	0	2	2	major facilitator transporter	MarR family transcriptional regulator					-
Burkholderia cenocepacia HI2424	Bacteria; Proteobacteria; Betaproteobacteria	NC_008542	652476	652623	0	1	1	tRNA-Pro	trans-hexaprenyltranstransferase					-
Burkholderia cenocepacia HI2424	Bacteria; Proteobacteria; Betaproteobacteria	NC_008543	2811651	2811964	0	1	1	NADPH-dependent FMN reductase	RNA polymerase sigma factor					-
Methanosaeta thermophila PT	Archaea; Euryarchaeota; Methanomicrobia	NC_008553	704635	705106	0	1	3	hypothetical protein	tRNA-Glu					-
Syntrophobacter fumaroxidans MPOB	Bacteria; Proteobacteria; Deltaproteobacteria	NC_008554	141048	141440	0	1	2	hypothetical protein	type IV-A pilus assembly ATPase PilB					-
Syntrophobacter fumaroxidans MPOB	Bacteria; Proteobacteria; Deltaproteobacteria	NC_008554	920917	921087	0	1	1	peptidoglycan-binding LysM	silent information regulator protein Sir2					-
Syntrophobacter fumaroxidans MPOB	Bacteria; Proteobacteria; Deltaproteobacteria	NC_008554	2990516	2991217	0	1	1	tRNA-Leu	hypothetical protein					-
Syntrophobacter fumaroxidans MPOB	Bacteria; Proteobacteria; Deltaproteobacteria	NC_008554	3728417	3728884	0	1	1	acetolactate synthase, large subunit, biosynthetic type	acetolactate synthase, large subunit, biosynthetic type					-
Syntrophobacter fumaroxidans MPOB	Bacteria; Proteobacteria; Deltaproteobacteria	NC_008554	4298381	4298724	0	3	1	hypothetical protein	ErfK/YbiS/YcfS/YnhG family protein					-
Magnetococcus sp. MC-1	Bacteria; Proteobacteria; Magnetococcus.	NC_008576	539445	539814	0	1	3	citrate transporter	hydrolase					-
Magnetococcus sp. MC-1	Bacteria; Proteobacteria; Magnetococcus.	NC_008576	3832054	3832549	0	2	2	serine O-acetyltransferase	hypothetical protein					-
Shewanella sp. ANA-3	Bacteria; Proteobacteria; Gammaproteobacteria	NC_008577	1679418	1679599	0	1	1	RND family efflux transporter MFP subunit	hypothetical protein					-
Pelobacter propionicus DSM 2379	Bacteria; Proteobacteria; Deltaproteobacteria	NC_008609	343443	343586	0	1	1	NADH ubiquinone oxidoreductase, 20 kDa subunit	beta-hydroxyacyl-(acyl-carrier-protein) dehydratase FabZ					-
Pelobacter propionicus DSM 2379	Bacteria; Proteobacteria; Deltaproteobacteria	NC_008609	350335	350448	0	1	2	50S ribosomal protein L21	ribonuclease					-
Pelobacter propionicus DSM 2379	Bacteria; Proteobacteria; Deltaproteobacteria	NC_008609	789009	789221	0	4	2	serine O-acetyltransferase	tartrate/fumarate subfamily Fe-S type hydro-lyase beta subunit					-
Pelobacter propionicus DSM 2379	Bacteria; Proteobacteria; Deltaproteobacteria	NC_008609	801662	801890	0	2	1	acetaldehyde dehydrogenase (acetylating)	hypothetical protein					-
Pelobacter propionicus DSM 2379	Bacteria; Proteobacteria; Deltaproteobacteria	NC_008609	1368300	1368370	0	1	1	cobalamin (vitamin B12) biosynthesis CbiX protein	alpha-2-macroglobulin domain-containing protein					-
Pelobacter propionicus DSM 2379	Bacteria; Proteobacteria; Deltaproteobacteria	NC_008609	1431742	1431830	0	1	2	hydroxymethylbutenyl pyrophosphate reductase	ribosomal protein S1					-
Pelobacter propionicus DSM 2379	Bacteria; Proteobacteria; Deltaproteobacteria	NC_008609	2167987	2168158	0	1	1	phosphoglucomutase/phosphomannomutase alpha/beta/subunit	hypothetical protein					-
Pelobacter propionicus DSM 2379	Bacteria; Proteobacteria; Deltaproteobacteria	NC_008609	2622978	2623207	0	2	3	GPR1/FUN34/yaaH family protein	transglutaminase domain-containing protein					-
Pelobacter propionicus DSM 2379	Bacteria; Proteobacteria; Deltaproteobacteria	NC_008609	3272496	3272663	0	4	1	cytochrome c family protein	redoxin domain-containing protein					-
Pelobacter propionicus DSM 2379	Bacteria; Proteobacteria; Deltaproteobacteria	NC_008609	3880467	3880748	0	1	1	hypothetical protein	pyruvate phosphate dikinase					-
Shewanella amazonensis SB2B	Bacteria; Proteobacteria; Gammaproteobacteria	NC_008700	107450	107835	0	1	2	DNA-directed DNA polymerase	isoprenoid biosynthesis protein with amidotransferase-like domain					-
Shewanella amazonensis SB2B	Bacteria; Proteobacteria; Gammaproteobacteria	NC_008700	2408431	2408588	0	2	1	acyl carrier protein	3-oxoacyl-(acyl-carrier-protein) reductase					-
Shewanella amazonensis SB2B	Bacteria; Proteobacteria; Gammaproteobacteria	NC_008700	2689405	2689761	0	4	2	ferredoxin-type protein NapF	hypothetical protein					-
Mycobacterium sp. KMS	Bacteria; Actinobacteria; Actinobacteridae	NC_008704	216346	428	0	2	1	hypothetical protein	hypothetical protein					-
Psychromonas ingrahamii 37	Bacteria; Proteobacteria; Gammaproteobacteria	NC_008709	4265429	4265712	0	1	1	ribosomal protein L10	ribosomal protein L1					-
Marinobacter aquaeolei VT8	Bacteria; Proteobacteria; Gammaproteobacteria	NC_008740	466110	466565	0	1	6	resolvase domain-containing protein	integrase catalytic subunit					-
Marinobacter aquaeolei VT8	Bacteria; Proteobacteria; Gammaproteobacteria	NC_008740	3312591	3313215	0	3	1	integrase catalytic subunit	hypothetical protein					-
Acidovorax citrulli AAC00-1	Bacteria; Proteobacteria; Betaproteobacteria	NC_008752	1877642	1877990	0	1	3	Arc domain-containing protein	hypothetical protein					-
Acidovorax citrulli AAC00-1	Bacteria; Proteobacteria; Betaproteobacteria	NC_008752	4602633	4603172	0	1	4	hypothetical protein	hypothetical protein					-
Acidovorax sp. JS42	Bacteria; Proteobacteria; Betaproteobacteria	NC_008765	39507	40602	0	2	6	methyltransferase type 11	hypothetical protein					-
Polaromonas naphthalenivorans CJ2	Bacteria; Proteobacteria; Betaproteobacteria	NC_008781	3962552	3962682	0	2	1	hypothetical protein	NUDIX hydrolase					-
Methylibium petroleiphilum PM1	Bacteria; Proteobacteria; Betaproteobacteria	NC_008826	352337	352633	0	4	2	hypothetical protein	hypothetical protein					-
Burkholderia mallei NCTC 10229	Bacteria; Proteobacteria; Betaproteobacteria	NC_008835	1486363	1486596	0	1	1	NADPH-dependent FMN reductase domain-containing protein	hypothetical protein					-
Burkholderia mallei NCTC 10229	Bacteria; Proteobacteria; Betaproteobacteria	NC_008836	3260956	3261125	0	1	1	glutamyl-tRNA synthetase	tRNA-Ala					-
Methanocorpusculum labreanum Z	Archaea; Euryarchaeota; Methanomicrobia	NC_008942	1519868	1520104	0	1	1	30S ribosomal protein S19e	pseudogene					-
Clostridium thermocellum ATCC 27405	Bacteria; Firmicutes; Clostridia	NC_009012	572760	572938	0	2	2	exodeoxyribonuclease III Xth	DNA protecting protein DprA					-
Clostridium thermocellum ATCC 27405	Bacteria; Firmicutes; Clostridia	NC_009012	2021866	2022139	0	1	3	pseudogene	recombinase					-
Clostridium thermocellum ATCC 27405	Bacteria; Firmicutes; Clostridia	NC_009012	2559426	2559647	0	2	1	hypothetical protein	hypothetical protein					-
Clostridium thermocellum ATCC 27405	Bacteria; Firmicutes; Clostridia	NC_009012	3065054	3065157	0	4	1	hypothetical protein	peptide chain release factor 1					-
Clostridium thermocellum ATCC 27405	Bacteria; Firmicutes; Clostridia	NC_009012	3209651	3209922	0	2	1	50S ribosomal protein L1	50S ribosomal protein L10P					-
Shewanella baltica OS155	Bacteria; Proteobacteria; Gammaproteobacteria	NC_009052	360586	360730	0	1	1	rhodanese domain-containing protein	XRE family transcriptional regulator					-
Shewanella baltica OS155	Bacteria; Proteobacteria; Gammaproteobacteria	NC_009052	1999924	2000087	0	1	1	3-oxoacyl-(acyl-carrier-protein) reductase	acyl carrier protein					-
Burkholderia pseudomallei 668	Bacteria; Proteobacteria; Betaproteobacteria	NC_009075	3118938	3119171	0	3	1	NADPH-dependent FMN reductase domain-containing protein	hypothetical protein					-
Burkholderia pseudomallei 1106a	Bacteria; Proteobacteria; Betaproteobacteria	NC_009076	1305377	1305831	0	1	2	hypothetical protein	hypothetical protein					-
Burkholderia pseudomallei 1106a	Bacteria; Proteobacteria; Betaproteobacteria	NC_009078	3091893	3092126	0	1	1	NADPH-dependent FMN reductase	hypothetical protein					-
Burkholderia mallei NCTC 10247	Bacteria; Proteobacteria; Betaproteobacteria	NC_009079	2343735	2343968	0	1	1	NADPH-dependent FMN reductase domain-containing protein	hypothetical protein					-
Burkholderia mallei NCTC 10247	Bacteria; Proteobacteria; Betaproteobacteria	NC_009080	1810487	1810575	0	1	1	tRNA-Asn	tRNA-Asn					-
Burkholderia mallei NCTC 10247	Bacteria; Proteobacteria; Betaproteobacteria	NC_009080	1893831	1894498	0	5	1	transposase subfamily protein	LysR family transcriptional regulator					-
Shewanella loihica PV-4	Bacteria; Proteobacteria; Gammaproteobacteria	NC_009092	160718	160906	0	1	1	tRNA-Gly	elongation factor Tu					-
Shewanella loihica PV-4	Bacteria; Proteobacteria; Gammaproteobacteria	NC_009092	2946755	2947013	0	1	1	histone family protein DNA-binding protein	ATP-dependent protease La					-
Shewanella loihica PV-4	Bacteria; Proteobacteria; Gammaproteobacteria	NC_009092	4418000	4418345	0	1	1	isoprenoid biosynthesis protein with amidotransferase-like domain	DNA polymerase I					-
Rhodobacter sphaeroides ATCC 17025	Bacteria; Proteobacteria; Alphaproteobacteria	NC_009428	2711975	2712356	0	5	6	hypothetical protein	Maf family protein					-
Rhodobacter sphaeroides ATCC 17025	Bacteria; Proteobacteria; Alphaproteobacteria	NC_009428	3217575	50	0	1	3	hypothetical protein	30S ribosomal protein S20					-
Rhodobacter sphaeroides ATCC 17025	Bacteria; Proteobacteria; Alphaproteobacteria	NC_009433	12924	143	0	26	20	hypothetical protein	SMF family protein					-
Enterobacter sp. 638	Bacteria; Proteobacteria; Gammaproteobacteria	NC_009436	4487049	4487421	0	4	1	flavodoxin	tRNA uridine 5-carboxymethylaminomethyl modification enzyme GidA					-
Pseudomonas mendocina ymp	Bacteria; Proteobacteria; Gammaproteobacteria	NC_009439	1358181	1358345	0	1	2	ATP-dependent protease-like protein	hypothetical protein					-
Pseudomonas mendocina ymp	Bacteria; Proteobacteria; Gammaproteobacteria	NC_009439	1475321	1475657	0	2	2	peptidylprolyl isomerase, FKBP-type	hypothetical protein					-
Pseudomonas mendocina ymp	Bacteria; Proteobacteria; Gammaproteobacteria	NC_009439	3681155	3681519	0	4	3	Sel1 domain-containing protein	hypothetical protein					-
Pseudomonas mendocina ymp	Bacteria; Proteobacteria; Gammaproteobacteria	NC_009439	5038398	5038618	0	3	1	precorrin-4 C11-methyltransferase	hypothetical protein					-
Dehalococcoides sp. BAV1	Bacteria; Chloroflexi; Dehalococcoidetes	NC_009455	1148377	1148522	0	1	1	twitching motility protein	hypothetical protein					-
Vibrio cholerae O395	Bacteria; Proteobacteria; Gammaproteobacteria	NC_009457	1879108	1879247	0	3	2	glutamyl-tRNA reductase	outer membrane lipoprotein LolB					-
Geobacter uraniireducens Rf4	Bacteria; Proteobacteria; Deltaproteobacteria	NC_009483	595968	596160	0	1	1	radical SAM domain-containing protein	hypothetical protein					-
Geobacter uraniireducens Rf4	Bacteria; Proteobacteria; Deltaproteobacteria	NC_009483	934555	934807	0	1	1	cobalamin (vitamin B12) biosynthesis CbiM protein	Sel1 domain-containing protein					-
Geobacter uraniireducens Rf4	Bacteria; Proteobacteria; Deltaproteobacteria	NC_009483	1043438	1043701	0	3	1	cupin 2 domain-containing protein	protease Do					-
Geobacter uraniireducens Rf4	Bacteria; Proteobacteria; Deltaproteobacteria	NC_009483	1250893	1250998	0	1	2	tRNA pseudouridine synthase A	50S ribosomal protein L13					-
Geobacter uraniireducens Rf4	Bacteria; Proteobacteria; Deltaproteobacteria	NC_009483	2431066	2431329	0	1	1	malic enzyme	histidine triad (HIT) protein					-
Geobacter uraniireducens Rf4	Bacteria; Proteobacteria; Deltaproteobacteria	NC_009483	4972061	4972258	0	2	1	hypothetical protein	co-chaperonin GroES					-
Acidiphilium cryptum JF-5	Bacteria; Proteobacteria; Alphaproteobacteria	NC_009484	473326	473916	0	4	2	leucyl aminopeptidase	excinuclease ABC subunit C					-
Acidiphilium cryptum JF-5	Bacteria; Proteobacteria; Alphaproteobacteria	NC_009484	2731995	2732262	0	1	1	uroporphyrinogen decarboxylase	hypothetical protein					-
Bradyrhizobium sp. BTAi1	Bacteria; Proteobacteria; Alphaproteobacteria	NC_009485	1488271	1488747	0	2	1	putative inositol monophosphatase family protein	putative N-formylglutamate amidohydrolase					-
Staphylococcus aureus subsp. aureus JH9	Bacteria; Firmicutes; Bacillales	NC_009487	420621	420931	0	1	1	glycerol-3-phosphate transporter	glyoxalase/bleomycin resistance protein/dioxygenase					-
Pseudomonas putida F1	Bacteria; Proteobacteria; Gammaproteobacteria	NC_009512	4546185	4547135	0	1	3	Sel1 domain-containing protein	hypothetical protein					-
Lactobacillus reuteri DSM 20016	Bacteria; Firmicutes; Lactobacillales	NC_009513	583297	583385	0	1	1	competence/damage-inducible protein CinA	recombinase A					-
Lactobacillus reuteri DSM 20016	Bacteria; Firmicutes; Lactobacillales	NC_009513	1535055	1535321	0	1	4	30S ribosomal protein S12	peptidase A24A domain-containing protein					-
Roseiflexus sp. RS-1	Bacteria; Chloroflexi; Chloroflexales	NC_009523	3207228	3207888	0	1	1	hypothetical protein	hypothetical protein					-
Psychrobacter sp. PRwf-1	Bacteria; Proteobacteria; Gammaproteobacteria	NC_009524	437742	438255	0	2	1	LysR family transcriptional regulator	sodium:dicarboxylate symporter					-
Psychrobacter sp. PRwf-1	Bacteria; Proteobacteria; Gammaproteobacteria	NC_009524	1211546	1211940	0	3	1	AsnC family transcriptional regulator	2-isopropylmalate synthase					-
Psychrobacter sp. PRwf-1	Bacteria; Proteobacteria; Gammaproteobacteria	NC_009524	2521932	2522083	0	1	1	phospholipase A(1)	hypothetical protein					-
Psychrobacter sp. PRwf-1	Bacteria; Proteobacteria; Gammaproteobacteria	NC_009524	2527084	2527240	0	1	1	tRNA-Pro	hypothetical protein					-
Mycobacterium tuberculosis F11	Bacteria; Actinobacteria; Actinobacteridae	NC_009565	2846832	2847426	0	39	96	hypothetical protein	lipoprotein lppS					-
Sinorhizobium medicae WSM419	Bacteria; Proteobacteria; Alphaproteobacteria	NC_009622	219166	296	0	2	1	glycoside hydrolase family protein	hypothetical protein					-
Staphylococcus aureus subsp. aureus JH1	Bacteria; Firmicutes; Bacillales	NC_009632	122454	122683	0	1	1	periplasmic binding protein	pyridoxal-5'-phosphate-dependent protein beta subunit					-
Sinorhizobium medicae WSM419	Bacteria; Proteobacteria; Alphaproteobacteria	NC_009636	47154	47290	0	3	2	apolipoprotein N-acyltransferase	XRE family transcriptional regulator					-
Marinomonas sp. MWYL1	Bacteria; Proteobacteria; Gammaproteobacteria	NC_009654	1209552	1209640	0	1	1	DNA-binding transcriptional regulator HexR	aminoglycoside phosphotransferase					-
Pseudomonas aeruginosa PA7	Bacteria; Proteobacteria; Gammaproteobacteria	NC_009656	608188	608875	0	1	1	hypothetical protein	hypothetical protein					-
Pseudomonas aeruginosa PA7	Bacteria; Proteobacteria; Gammaproteobacteria	NC_009656	5571465	5571922	0	1	1	hypothetical protein	putative sulfite oxidase subunit YedZ					-
Shewanella baltica OS185	Bacteria; Proteobacteria; Gammaproteobacteria	NC_009665	361430	361574	0	1	1	rhodanese domain-containing protein	XRE family transcriptional regulator					-
Shewanella baltica OS185	Bacteria; Proteobacteria; Gammaproteobacteria	NC_009665	390287	390465	0	2	3	CaCA family Na(+)/Ca(+) antiporter	AMP-dependent synthetase and ligase					-
Shewanella baltica OS185	Bacteria; Proteobacteria; Gammaproteobacteria	NC_009665	844135	844424	0	1	2	AFG1 family ATPase	50S ribosomal protein L13					-
Shewanella baltica OS185	Bacteria; Proteobacteria; Gammaproteobacteria	NC_009665	1044904	1045130	0	1	1	SH3 type 3 domain-containing protein	phosphate transporter					-
Ochrobactrum anthropi ATCC 49188	Bacteria; Proteobacteria; Alphaproteobacteria	NC_009667	743616	743977	0	3	4	pseudogene	enoyl-CoA hydratase					-
Ochrobactrum anthropi ATCC 49188	Bacteria; Proteobacteria; Alphaproteobacteria	NC_009670	101427	91	0	1	3	parB-like partition protein	replication initiation protein RepC					-
Bacillus cytotoxicus NVH 391-98	Bacteria; Firmicutes; Bacillales	NC_009674	3397787	3398132	0	2	2	methionine gamma-lyase	30S ribosomal protein S4					-
Bacillus cytotoxicus NVH 391-98	Bacteria; Firmicutes; Bacillales	NC_009674	3702983	3703283	0	1	3	amino acid carrier protein	hypothetical protein					-
Bacillus cytotoxicus NVH 391-98	Bacteria; Firmicutes; Bacillales	NC_009674	3823681	3824227	0	1	1	hypothetical protein	sulfatase					-
Yersinia pseudotuberculosis IP 31758	Bacteria; Proteobacteria; Gammaproteobacteria	NC_009708	653670	654074	0	1	2	30S ribosomal protein S21	putative DNA-binding/iron metalloprotein/AP endonuclease					-
Yersinia pseudotuberculosis IP 31758	Bacteria; Proteobacteria; Gammaproteobacteria	NC_009708	2693063	2693238	0	5	1	hypothetical protein	tRNA-Asn					-
Fervidobacterium nodosum Rt17-B1	Bacteria; Thermotogae; Thermotogales	NC_009718	723643	723774	0	1	2	metal dependent phosphohydrolase	tRNA-Glu					-
Roseiflexus castenholzii DSM 13941	Bacteria; Chloroflexi; Chloroflexales	NC_009767	4149624	4149984	0	1	1	integral membrane protein MviN	ribosomal protein S20					-
Escherichia coli HS	Bacteria; Proteobacteria; Gammaproteobacteria	NC_009800	839551	840128	0	2	5	dithiobiotin synthetase	excinuclease ABC subunit B					-
Escherichia coli HS	Bacteria; Proteobacteria; Gammaproteobacteria	NC_009800	2987298	2987649	0	4	1	dinucleoside polyphosphate hydrolase	hypothetical protein					-
Escherichia coli E24377A	Bacteria; Proteobacteria; Gammaproteobacteria	NC_009801	861125	861702	0	3	4	dithiobiotin synthetase	excinuclease ABC subunit B					-
Escherichia coli E24377A	Bacteria; Proteobacteria; Gammaproteobacteria	NC_009801	981643	982004	0	3	1	hypothetical protein	leucine-responsive transcriptional regulator					-
Escherichia coli E24377A	Bacteria; Proteobacteria; Gammaproteobacteria	NC_009801	3540211	3540447	0	1	1	putative DNA-binding/iron metalloprotein/AP endonuclease	30S ribosomal protein S21					-
Escherichia coli E24377A	Bacteria; Proteobacteria; Gammaproteobacteria	NC_009801	4304293	4304350	0	1	1	tRNA-Arg	tRNA-His					-
Campylobacter concisus 13826	Bacteria; Proteobacteria; Epsilonproteobacteria	NC_009802	882643	882861	0	1	1	peptidoglycan associated lipoprotein	chaperone ClpB 1					-
Serratia proteamaculans 568	Bacteria; Proteobacteria; Gammaproteobacteria	NC_009832	474991	475288	0	1	2	tRNA-Gly	putative iron-sulfur cluster binding protein					-
Serratia proteamaculans 568	Bacteria; Proteobacteria; Gammaproteobacteria	NC_009832	5419875	5420378	0	1	2	DNA polymerase I	putative acyltransferase					-
Desulfococcus oleovorans Hxd3	Bacteria; Proteobacteria; Deltaproteobacteria	NC_009943	529124	529532	0	4	2	cytochrome c class III	DsrC family protein					-
Desulfococcus oleovorans Hxd3	Bacteria; Proteobacteria; Deltaproteobacteria	NC_009943	823776	824075	0	1	1	lytic transglycosylase catalytic	tRNA-Thr					-
Desulfococcus oleovorans Hxd3	Bacteria; Proteobacteria; Deltaproteobacteria	NC_009943	1556878	1557361	0	6	1	hypothetical protein	acyl-CoA dehydrogenase domain-containing protein					-
Desulfococcus oleovorans Hxd3	Bacteria; Proteobacteria; Deltaproteobacteria	NC_009943	3208868	3209129	0	4	1	dihydrodipicolinate synthase	TPR repeat-containing protein					-
Desulfococcus oleovorans Hxd3	Bacteria; Proteobacteria; Deltaproteobacteria	NC_009943	3693497	3693702	0	1	2	alpha/beta hydrolase fold	hypothetical protein					-
Desulfococcus oleovorans Hxd3	Bacteria; Proteobacteria; Deltaproteobacteria	NC_009943	3877814	3877999	0	2	1	ApbE family lipoprotein	Nitrilase/cyanide hydratase and apolipoprotein N-acyltransferase					-
Salinispora arenicola CNS-205	Bacteria; Actinobacteria; Actinobacteridae	NC_009953	1924	2704	0	4	7	chromosomal replication initiator protein DnaA	DNA polymerase III, beta subunit					-
Herpetosiphon aurantiacus ATCC 23779	Bacteria; Chloroflexi; Herpetosiphonales	NC_009972	424141	424367	0	1	2	hypothetical protein	hypothetical protein					-
Herpetosiphon aurantiacus ATCC 23779	Bacteria; Chloroflexi; Herpetosiphonales	NC_009972	945590	946147	0	1	3	hypothetical protein	hypothetical protein					-
Herpetosiphon aurantiacus ATCC 23779	Bacteria; Chloroflexi; Herpetosiphonales	NC_009972	1777874	1778226	0	1	4	transcriptional antiterminator, BglG	PTS system, mannitol-specific IIC subunit					-
Herpetosiphon aurantiacus ATCC 23779	Bacteria; Chloroflexi; Herpetosiphonales	NC_009972	3586309	3586897	0	1	1	AAA ATPase containing von Willebrand factor type A (vWA) protein-like omain	glycoside hydrolase family protein					-
Herpetosiphon aurantiacus ATCC 23779	Bacteria; Chloroflexi; Herpetosiphonales	NC_009972	5605793	5606210	0	2	1	acetyl-CoA acetyltransferase	DNA topoisomerase I					-
Herpetosiphon aurantiacus ATCC 23779	Bacteria; Chloroflexi; Herpetosiphonales	NC_009972	5665347	5665753	0	3	1	hypothetical protein	hypothetical protein					-
Herpetosiphon aurantiacus ATCC 23779	Bacteria; Chloroflexi; Herpetosiphonales	NC_009972	5857891	5858039	0	1	1	GCN5-related N-acetyltransferase	putative ABC transporter, permease component					-
Shewanella baltica OS195	Bacteria; Proteobacteria; Gammaproteobacteria	NC_009997	369161	369305	0	1	2	rhodanese domain-containing protein	XRE family transcriptional regulator					-
Shewanella baltica OS195	Bacteria; Proteobacteria; Gammaproteobacteria	NC_009997	1541049	1541238	0	1	1	cytochrome c prime	Trp operon repressor					-
Shewanella baltica OS195	Bacteria; Proteobacteria; Gammaproteobacteria	NC_009997	5296394	5296780	0	3	1	isoprenoid biosynthesis protein with amidotransferase-like domain	DNA polymerase I					-
Clostridium phytofermentans ISDg	Bacteria; Firmicutes; Clostridia	NC_010001	300437	300817	0	1	1	hypothetical protein	rod shape-determining protein MreB					-
Clostridium phytofermentans ISDg	Bacteria; Firmicutes; Clostridia	NC_010001	668902	669185	0	1	1	histidine kinase internal region	binding-protein-dependent transport systems inner membrane component					-
Clostridium phytofermentans ISDg	Bacteria; Firmicutes; Clostridia	NC_010001	714528	714686	0	1	1	hypothetical protein	cold-shock DNA-binding domain-containing protein					-
Clostridium phytofermentans ISDg	Bacteria; Firmicutes; Clostridia	NC_010001	871453	871580	0	1	1	hypothetical protein	TetR family transcriptional regulator					-
Clostridium phytofermentans ISDg	Bacteria; Firmicutes; Clostridia	NC_010001	988167	988604	0	1	1	basic membrane lipoprotein	ABC transporter related					-
Clostridium phytofermentans ISDg	Bacteria; Firmicutes; Clostridia	NC_010001	1409587	1410193	0	6	4	L-lactate dehydrogenase	extracellular solute-binding protein					-
Clostridium phytofermentans ISDg	Bacteria; Firmicutes; Clostridia	NC_010001	3333361	3333645	0	2	2	ribokinase-like domain-containing protein	Altronate dehydratase					-
Clostridium phytofermentans ISDg	Bacteria; Firmicutes; Clostridia	NC_010001	4633420	4633786	0	3	1	ABC transporter related	ABC transporter related					-
Petrotoga mobilis SJ95	Bacteria; Thermotogae; Thermotogales	NC_010003	1229716	1229920	0	1	1	ABC-type nitrate/sulfonate/bicarbonate transport systems periplasmic components-like protein	hydrogenase, Fe-only					-
Petrotoga mobilis SJ95	Bacteria; Thermotogae; Thermotogales	NC_010003	1695448	1695859	0	1	4	major facilitator transporter	pseudogene					-
Yersinia pestis Angola	Bacteria; Proteobacteria; Gammaproteobacteria	NC_010159	1175507	1175819	0	2	1	50S ribosomal protein L13	hypothetical protein					-
Bacillus weihenstephanensis KBAB4	Bacteria; Firmicutes; Bacillales	NC_010184	144568	144719	0	1	1	tRNA pseudouridine synthase A	50S ribosomal protein L13					-
Bacillus weihenstephanensis KBAB4	Bacteria; Firmicutes; Bacillales	NC_010184	4719461	4719510	0	1	2	hypothetical protein	BioY protein					-
Bacillus weihenstephanensis KBAB4	Bacteria; Firmicutes; Bacillales	NC_010184	5083547	5083933	0	1	1	PTS system, glucose subfamily, IIA subunit	DoxX family protein					-
Thermoanaerobacter sp. X514	Bacteria; Firmicutes; Clostridia	NC_010320	531545	531917	0	1	1	GMP synthase	xanthine/uracil/vitamin C permease					-
Pseudomonas putida GB-1	Bacteria; Proteobacteria; Gammaproteobacteria	NC_010322	389255	390129	0	1	6	electron transfer flavoprotein alpha/beta-subunit	hypothetical protein					-
Pseudomonas putida GB-1	Bacteria; Proteobacteria; Gammaproteobacteria	NC_010322	1346400	1347206	0	2	5	transcriptional regulator PrtN, putative	putative phage repressor					-
Pseudomonas putida GB-1	Bacteria; Proteobacteria; Gammaproteobacteria	NC_010322	1435934	1436884	0	14	1	hypothetical protein	Sel1 domain-containing protein					-
Candidatus Desulforudis audaxviator MP104C	Bacteria; Firmicutes; Clostridia	NC_010424	161105	161655	0	6	2	asparagine synthase (glutamine-hydrolyzing)	nitrogen regulatory protein P-II					-
Candidatus Desulforudis audaxviator MP104C	Bacteria; Firmicutes; Clostridia	NC_010424	1135784	1136398	0	3	3	methyl-accepting chemotaxis sensory transducer	sulfate adenylyltransferase					-
Candidatus Desulforudis audaxviator MP104C	Bacteria; Firmicutes; Clostridia	NC_010424	1307084	1307353	0	2	1	transposase, IS4 family protein	tRNA-Leu					-
Escherichia coli ATCC 8739	Bacteria; Proteobacteria; Gammaproteobacteria	NC_010468	1105103	1105417	0	2	1	carbon storage regulator	tRNA-Ser					-
Thermotoga sp. RQ2	Bacteria; Thermotogae; Thermotogales	NC_010483	1556836	1557049	0	5	1	aspartyl/glutamyl-tRNA amidotransferase subunit A	type IV pilin-related protein					-
Escherichia coli SMS-3-5	Bacteria; Proteobacteria; Gammaproteobacteria	NC_010498	804796	805373	0	1	2	dithiobiotin synthetase	excinuclease ABC subunit B					-
Escherichia coli SMS-3-5	Bacteria; Proteobacteria; Gammaproteobacteria	NC_010498	2167328	2167504	0	2	1	hypothetical protein	outer membrane protein A					-
Escherichia coli SMS-3-5	Bacteria; Proteobacteria; Gammaproteobacteria	NC_010498	2893871	2894184	0	1	1	tRNA-Ser	carbon storage regulator					-
Escherichia coli SMS-3-5	Bacteria; Proteobacteria; Gammaproteobacteria	NC_010498	3057610	3058053	0	1	1	dinucleoside polyphosphate hydrolase	hypothetical protein					-
Pseudomonas putida W619	Bacteria; Proteobacteria; Gammaproteobacteria	NC_010501	1376799	1377823	0	5	5	hypothetical protein	hypothetical protein					-
Pseudomonas putida W619	Bacteria; Proteobacteria; Gammaproteobacteria	NC_010501	5405517	5405909	0	2	1	hypothetical protein	electron transfer flavoprotein alpha/beta-subunit					-
Pseudomonas putida W619	Bacteria; Proteobacteria; Gammaproteobacteria	NC_010501	5446626	5446909	0	1	1	hypothetical protein	hypothetical protein					-
Shewanella woodyi ATCC 51908	Bacteria; Proteobacteria; Gammaproteobacteria	NC_010506	1315664	1315937	0	2	1	polyprenyl synthetase	50S ribosomal protein L21					-
Burkholderia cenocepacia MC0-3	Bacteria; Proteobacteria; Betaproteobacteria	NC_010508	1657508	1658184	0	7	1	triple helix repeat-containing collagen	Flp/Fap pilin component					-
Xylella fastidiosa M12	Bacteria; Proteobacteria; Gammaproteobacteria	NC_010513	2387999	2388972	0	5	4	cellulase	glutamate synthase subunit beta					-
Burkholderia cenocepacia MC0-3	Bacteria; Proteobacteria; Betaproteobacteria	NC_010515	1532558	1532925	0	3	1	RNA polymerase sigma factor	NADPH-dependent FMN reductase					-
Polynucleobacter necessarius subsp. necessarius STIR1	Bacteria; Proteobacteria; Betaproteobacteria	NC_010531	205809	206140	0	1	1	ribonucleotide-diphosphate reductase subunit beta	hypothetical protein					-
Polynucleobacter necessarius subsp. necessarius STIR1	Bacteria; Proteobacteria; Betaproteobacteria	NC_010531	1324961	1325277	0	2	2	co-chaperonin GroES	putative diguanylate phosphodiesterase					-
Burkholderia ambifaria MC40-6	Bacteria; Proteobacteria; Betaproteobacteria	NC_010551	1068901	1069005	0	1	2	tRNA-Asn	4Fe-4S ferredoxin iron-sulfur binding domain-containing protein					-
Burkholderia ambifaria MC40-6	Bacteria; Proteobacteria; Betaproteobacteria	NC_010552	2768001	2768366	0	2	2	NADPH-dependent FMN reductase	RNA polymerase sigma factor					-
Burkholderia ambifaria MC40-6	Bacteria; Proteobacteria; Betaproteobacteria	NC_010553	128191	128547	0	1	1	putative integrase protein	fimbrial protein					-
Burkholderia phymatum STM815	Bacteria; Proteobacteria; Betaproteobacteria	NC_010623	584700	585018	0	2	1	L-sorbosone dehydrogenase	transposase IS3/IS911 family protein					-
Burkholderia phymatum STM815	Bacteria; Proteobacteria; Betaproteobacteria	NC_010625	1904627	643	0	3	1	mandelate racemase/muconate lactonizing protein	2-oxoacid ferredoxin oxidoreductase					-
Burkholderia phytofirmans PsJN	Bacteria; Proteobacteria; Betaproteobacteria	NC_010676	2719118	2719402	0	1	3	amidohydrolase 2	transcriptional regulator, TetR family					-
Natranaerobius thermophilus JW/NM-WN-LF	Bacteria; Firmicutes; Clostridia	NC_010718	1095860	1096368	0	1	3	RNA polymerase, sigma-24 subunit, ECF subfamily	integrase family protein					-
Sulfurihydrogenibium sp. YO3AOP1	Bacteria; Aquificae; Aquificales	NC_010730	493400	494293	0	4	6	glutaredoxin-like domain protein	hypothetical protein					-
Chlorobium limicola DSM 245	Bacteria; Chlorobi; Chlorobia	NC_010803	364739	364907	0	1	2	surface antigen msp4 family protein	outer membrane protein assembly complex, YaeT protein					-
Geobacter lovleyi SZ	Bacteria; Proteobacteria; Deltaproteobacteria	NC_010814	250707	250882	0	4	1	hypothetical protein	filamentation induced by cAMP protein Fic					-
Geobacter lovleyi SZ	Bacteria; Proteobacteria; Deltaproteobacteria	NC_010814	450178	450275	0	2	1	phospholipase D/Transphosphatidylase	alkyl hydroperoxide reductase/ Thiol specific antioxidant/ Mal allergen					-
Geobacter lovleyi SZ	Bacteria; Proteobacteria; Deltaproteobacteria	NC_010814	1175345	1175505	0	1	1	phosphoribosyl-AMP cyclohydrolase	methyl-accepting chemotaxis sensory transducer					-
Geobacter lovleyi SZ	Bacteria; Proteobacteria; Deltaproteobacteria	NC_010814	1313355	1313463	0	1	1	ROK family protein	S-layer domain protein					-
Geobacter lovleyi SZ	Bacteria; Proteobacteria; Deltaproteobacteria	NC_010814	2330729	2330871	0	2	1	exodeoxyribonuclease VII small subunit	Radical SAM domain protein					-
Geobacter lovleyi SZ	Bacteria; Proteobacteria; Deltaproteobacteria	NC_010814	2364302	2364642	0	1	2	succinate dehydrogenase (or fumarate reductase) cytochrome b subunit, b558 family	tRNA-Leu					-
Geobacter lovleyi SZ	Bacteria; Proteobacteria; Deltaproteobacteria	NC_010814	3225208	3225359	0	1	1	hypothetical protein	cold-shock DNA-binding domain protein					-
Geobacter lovleyi SZ	Bacteria; Proteobacteria; Deltaproteobacteria	NC_010814	3482587	3482673	0	2	2	hypothetical protein	hypothetical protein					-
Geobacter lovleyi SZ	Bacteria; Proteobacteria; Deltaproteobacteria	NC_010814	3720571	3720669	0	1	2	cytochrome c family protein, putative	hypothetical protein					-
Bifidobacterium longum DJO10A	Bacteria; Actinobacteria; Actinobacteridae	NC_010816	1516334	1516629	0	1	2	molecular chaperone DnaK	hypothetical protein					-
Bifidobacterium longum DJO10A	Bacteria; Actinobacteria; Actinobacteridae	NC_010816	2040449	2040731	0	2	3	pullulanase-like glycosidase	threonine dehydrogenase					-
Bifidobacterium longum DJO10A	Bacteria; Actinobacteria; Actinobacteridae	NC_010816	2375612	48	0	3	1	hypothetical protein	cold shock protein					-
Chlorobium phaeobacteroides BS1	Bacteria; Chlorobi; Chlorobia	NC_010831	295804	296356	0	1	1	hypothetical protein	DNA mismatch repair protein MutL					-
Chlorobium phaeobacteroides BS1	Bacteria; Chlorobi; Chlorobia	NC_010831	641725	642138	0	1	1	phosphofructokinase	protein of unknown function DUF214					-
Prosthecochloris aestuarii DSM 271	Bacteria; Chlorobi; Chlorobia	NC_011059	623285	623563	0	5	1	Carbamoyl-phosphate synthetase large chain domain protein	3,4-dihydroxy-2-butanone 4-phosphate synthase					-
Pelodictyon phaeoclathratiforme BU-1	Bacteria; Chlorobi; Chlorobia	NC_011060	887430	887673	0	1	2	S-adenosylmethionine/tRNA-ribosyltransferase- isomerase	bifunctional aconitate hydratase 2/2-methylisocitrate dehydratase					-
Stenotrophomonas maltophilia R551-3	Bacteria; Proteobacteria; Gammaproteobacteria	NC_011071	885911	886243	0	6	1	elongation factor Tu	30S ribosomal protein S10					-
Stenotrophomonas maltophilia R551-3	Bacteria; Proteobacteria; Gammaproteobacteria	NC_011071	1544780	1545297	0	3	1	PhoH family protein	secretion protein HlyD family protein					-
Stenotrophomonas maltophilia R551-3	Bacteria; Proteobacteria; Gammaproteobacteria	NC_011071	2700848	2701031	0	2	1	tRNA-Glu	tRNA-Ala					-
Salmonella enterica subsp. enterica serovar Heidelberg str. SL476	Bacteria; Proteobacteria; Gammaproteobacteria	NC_011083	1354523	1354660	0	1	1	hypothetical protein	hypothetical protein					-
Salmonella enterica subsp. enterica serovar Schwarzengrund str. CVM19633	Bacteria; Proteobacteria; Gammaproteobacteria	NC_011094	884185	884347	0	1	1	tol-pal system protein YbgF	tRNA-Lys					-
Salmonella enterica subsp. enterica serovar Schwarzengrund str. CVM19633	Bacteria; Proteobacteria; Gammaproteobacteria	NC_011094	919914	920563	0	1	2	dithiobiotin synthetase	excinuclease ABC subunit B					-
Salmonella enterica subsp. enterica serovar Schwarzengrund str. CVM19633	Bacteria; Proteobacteria; Gammaproteobacteria	NC_011094	1238260	1238414	0	2	1	3-ketoacyl-(acyl-carrier-protein) reductase	acyl carrier protein					-
Salmonella enterica subsp. enterica serovar Schwarzengrund str. CVM19633	Bacteria; Proteobacteria; Gammaproteobacteria	NC_011094	1913770	1914573	0	2	1	cold shock-like protein CspC	hypothetical protein					-
Salmonella enterica subsp. enterica serovar Schwarzengrund str. CVM19633	Bacteria; Proteobacteria; Gammaproteobacteria	NC_011094	3066975	3067656	0	3	1	dinucleoside polyphosphate hydrolase	DNA mismatch repair protein					-
Salmonella enterica subsp. enterica serovar Schwarzengrund str. CVM19633	Bacteria; Proteobacteria; Gammaproteobacteria	NC_011094	3281353	3281579	0	3	2	putative DNA-binding/iron metalloprotein/AP endonuclease	30S ribosomal protein S21					-
Hydrogenobaculum sp. Y04AAS1	Bacteria; Aquificae; Aquificales	NC_011126	11564	11836	0	2	3	rare lipoprotein A	phosphate uptake regulator, PhoU					-
Alteromonas macleodii 'Deep ecotype'	Bacteria; Proteobacteria; Gammaproteobacteria	NC_011138	842820	843128	0	1	1	hypothetical protein	hypothetical protein					-
Alteromonas macleodii 'Deep ecotype'	Bacteria; Proteobacteria; Gammaproteobacteria	NC_011138	1811128	1811379	0	1	1	phosphoglucosamine mutase	cytochrome c assembly protein					-
Alteromonas macleodii 'Deep ecotype'	Bacteria; Proteobacteria; Gammaproteobacteria	NC_011138	2875482	2875516	0	1	2	hypothetical protein	K+-dependent Na+/Ca+ exchanger related-protein					-
Alteromonas macleodii 'Deep ecotype'	Bacteria; Proteobacteria; Gammaproteobacteria	NC_011138	3092857	3092994	0	1	1	tRNA-Arg	hypothetical protein					-
Geobacter bemidjiensis Bem	Bacteria; Proteobacteria; Deltaproteobacteria	NC_011146	778261	778586	0	1	2	integral membrane sensor signal transduction histidine kinase	transcriptional regulator, IclR family					-
Geobacter bemidjiensis Bem	Bacteria; Proteobacteria; Deltaproteobacteria	NC_011146	1275310	1275684	0	1	1	cytochrome c family protein	nucleic acid binding OB-fold tRNA/helicase-type					-
Geobacter bemidjiensis Bem	Bacteria; Proteobacteria; Deltaproteobacteria	NC_011146	1439459	1440805	0	1	4	large conductance mechanosensitive channel protein	hypothetical protein					-
Geobacter bemidjiensis Bem	Bacteria; Proteobacteria; Deltaproteobacteria	NC_011146	1590547	1590784	0	1	1	Rhodanese domain protein	OmpA/MotB domain protein					-
Geobacter bemidjiensis Bem	Bacteria; Proteobacteria; Deltaproteobacteria	NC_011146	1893097	1893423	0	3	1	sulfate adenylyltransferase subunit 2	protein of unknown function DUF81					-
Geobacter bemidjiensis Bem	Bacteria; Proteobacteria; Deltaproteobacteria	NC_011146	2468690	2469014	0	1	4	hypothetical protein	AMP-dependent synthetase and ligase					-
Geobacter bemidjiensis Bem	Bacteria; Proteobacteria; Deltaproteobacteria	NC_011146	2483435	2483670	0	4	1	NADH:flavin oxidoreductase/NADH oxidase	protein of unknown function UPF0005					-
Geobacter bemidjiensis Bem	Bacteria; Proteobacteria; Deltaproteobacteria	NC_011146	2649089	2649323	0	1	1	acetate kinase	4Fe-4S ferredoxin iron-sulfur binding domain protein					-
Geobacter bemidjiensis Bem	Bacteria; Proteobacteria; Deltaproteobacteria	NC_011146	3217320	3217638	0	2	2	hypothetical protein	hypothetical protein					-
Geobacter bemidjiensis Bem	Bacteria; Proteobacteria; Deltaproteobacteria	NC_011146	4465011	4465398	0	4	2	NADH-ubiquinone/plastoquinone oxidoreductase chain 3	glutamate-1-semialdehyde aminotransferase					-
Geobacter bemidjiensis Bem	Bacteria; Proteobacteria; Deltaproteobacteria	NC_011146	4539870	4540017	0	1	2	DNA repair protein RadA	transcriptional regulator, TraR/DksA family					-
Salmonella enterica subsp. enterica serovar Agona str. SL483	Bacteria; Proteobacteria; Gammaproteobacteria	NC_011149	827441	828090	0	1	1	dithiobiotin synthetase	excinuclease ABC subunit B					-
Salmonella enterica subsp. enterica serovar Agona str. SL483	Bacteria; Proteobacteria; Gammaproteobacteria	NC_011149	1017522	1017686	0	3	2	dihydroorotate dehydrogenase 2	hypothetical protein					-
Salmonella enterica subsp. enterica serovar Agona str. SL483	Bacteria; Proteobacteria; Gammaproteobacteria	NC_011149	1264414	1264875	0	1	1	hypothetical protein	cold shock-like protein CspC					-
Salmonella enterica subsp. enterica serovar Dublin str. CT_02021853	Bacteria; Proteobacteria; Gammaproteobacteria	NC_011205	887964	888613	0	1	1	dithiobiotin synthetase	excinuclease ABC subunit B					-
Salmonella enterica subsp. enterica serovar Dublin str. CT_02021853	Bacteria; Proteobacteria; Gammaproteobacteria	NC_011205	2562217	2562889	0	2	3	HTH-type transcriptional regulator PecT	hypothetical protein					-
Acidithiobacillus ferrooxidans ATCC 53993	Bacteria; Proteobacteria; Gammaproteobacteria	NC_011206	2399331	2399733	0	1	3	lipoprotein, putative	hypothetical protein					-
Aliivibrio salmonicida LFI1238	Bacteria; Proteobacteria; Gammaproteobacteria	NC_011312	396789	397064	0	1	1	octaprenyl-diphosphate synthase	50S ribosomal protein L21					-
Aliivibrio salmonicida LFI1238	Bacteria; Proteobacteria; Gammaproteobacteria	NC_011312	1850163	1850438	0	2	1	pseudogene	transposase					-
Escherichia coli O157:H7 str. EC4115	Bacteria; Proteobacteria; Gammaproteobacteria	NC_011353	2068760	2068847	0	1	1	3-hydroxy acid dehydrogenase	transcriptional regulator, GntR family					-
Shewanella baltica OS223	Bacteria; Proteobacteria; Gammaproteobacteria	NC_011663	862406	862695	0	4	3	AFG1-family ATPase	50S ribosomal protein L13					-
Shewanella baltica OS223	Bacteria; Proteobacteria; Gammaproteobacteria	NC_011663	3105723	3106174	0	1	3	lambda tail assembly I	hypothetical protein					-
Shewanella baltica OS223	Bacteria; Proteobacteria; Gammaproteobacteria	NC_011663	4831031	4831148	0	1	1	elongation factor Tu	tRNA-Thr					-
Bacillus cereus B4264	Bacteria; Firmicutes; Bacillales	NC_011725	4066143	4066481	0	1	1	PTS system, glucose-specific IIABC component	transcription antiterminator GlcT					-
Borrelia burgdorferi ZS7	Bacteria; Spirochaetes; Spirochaetales	NC_011728	905594	56	0	2	15	type I restriction enzyme r protein (hsdr_n)	hypothetical protein					-
Acidithiobacillus ferrooxidans ATCC 23270	Bacteria; Proteobacteria; Gammaproteobacteria	NC_011761	1740178	1740346	0	1	2	hypothetical protein	hypothetical protein					-
Acidithiobacillus ferrooxidans ATCC 23270	Bacteria; Proteobacteria; Gammaproteobacteria	NC_011761	2792246	2792678	0	2	2	hypothetical protein	cytochrome c4					-
Bacillus cereus G9842	Bacteria; Firmicutes; Bacillales	NC_011772	138759	138910	0	1	1	tRNA pseudouridine synthase A	50S ribosomal protein L13					-
Bacillus cereus G9842	Bacteria; Firmicutes; Bacillales	NC_011772	512935	512941	0	1	1	5S ribosomal RNA	tRNA-Asn					-
Bacillus cereus G9842	Bacteria; Firmicutes; Bacillales	NC_011772	1016523	1016750	0	2	2	glycerol uptake operon antiterminator regulatory protein	glycerol uptake facilitator protein					-
Bacillus cereus G9842	Bacteria; Firmicutes; Bacillales	NC_011772	1098840	1099122	0	2	1	hypothetical protein	cold shock protein CspA					-
Desulfitobacterium hafniense DCB-2	Bacteria; Firmicutes; Clostridia	NC_011830	163686	163843	0	1	1	aspartate alpha-decarboxylase	L-aspartate oxidase					-
Desulfitobacterium hafniense DCB-2	Bacteria; Firmicutes; Clostridia	NC_011830	1084356	1084627	0	1	1	hydrogenase large subunit domain protein	hypothetical protein					-
Desulfitobacterium hafniense DCB-2	Bacteria; Firmicutes; Clostridia	NC_011830	1476445	1476783	0	1	3	UBA/THIF-type NAD/FAD binding protein	hypothetical protein					-
Desulfitobacterium hafniense DCB-2	Bacteria; Firmicutes; Clostridia	NC_011830	3136860	3137028	0	1	3	sporulation integral membrane protein YtvI	Radical SAM domain protein					-
Desulfitobacterium hafniense DCB-2	Bacteria; Firmicutes; Clostridia	NC_011830	4368271	4368520	0	3	1	sulfate ABC transporter, periplasmic sulfate-binding protein	Lytic transglycosylase catalytic					-
Methanosphaerula palustris E1-9c	Archaea; Euryarchaeota; Methanomicrobia	NC_011832	1785018	1785652	0	3	1	membrane-bound proton-translocating pyrophosphatase	K potassium transporter					-
Methanosphaerula palustris E1-9c	Archaea; Euryarchaeota; Methanomicrobia	NC_011832	2194822	2195213	0	1	2	Carbohydrate binding family 6	Carbohydrate binding family 6					-
Desulfovibrio desulfuricans subsp. desulfuricans str. ATCC 27774	Bacteria; Proteobacteria; Deltaproteobacteria	NC_011883	1402876	1403071	0	1	1	Peptidase M23	protein-L-isoaspartate O-methyltransferase					-
Desulfovibrio desulfuricans subsp. desulfuricans str. ATCC 27774	Bacteria; Proteobacteria; Deltaproteobacteria	NC_011883	1907738	1908135	0	1	2	hypothetical protein	tryptophan synthase subunit alpha					-
Cyanothece sp. PCC 7425	Bacteria; Cyanobacteria; Chroococcales	NC_011884	641426	641716	0	2	1	periplasmic solute binding protein	S-layer domain protein					-
Halothermothrix orenii H 168	Bacteria; Firmicutes; Clostridia	NC_011899	333133	333933	0	1	2	transcriptional regulator, DeoR family	Zn-dependent alcohol dehydrogenase					-
Halothermothrix orenii H 168	Bacteria; Firmicutes; Clostridia	NC_011899	1113176	1113252	0	1	1	acetate kinase	predicted metal-binding, possibly nucleic acid-binding protein					-
Halothermothrix orenii H 168	Bacteria; Firmicutes; Clostridia	NC_011899	1596755	1597315	0	1	1	Ankyrin	hypothetical protein					-
Halothermothrix orenii H 168	Bacteria; Firmicutes; Clostridia	NC_011899	2555374	2555491	0	1	1	ribosomal protein S6	GTP-binding protein YchF					-
Thioalkalivibrio sp. HL-EbGR7	Bacteria; Proteobacteria; Gammaproteobacteria	NC_011901	305174	306461	0	5	1	hypothetical protein	primosomal protein N'					-
Thioalkalivibrio sp. HL-EbGR7	Bacteria; Proteobacteria; Gammaproteobacteria	NC_011901	3105458	3105880	0	1	3	2-alkenal reductase	ribosomal protein L31					-
Agrobacterium vitis S4	Bacteria; Proteobacteria; Alphaproteobacteria	NC_011989	1121623	1121811	0	1	1	phage portal protein HK97 family	hypothetical protein					-
Campylobacter lari RM2100	Bacteria; Proteobacteria; Epsilonproteobacteria	NC_012039	1180780	1180871	0	1	1	DNA-binding protein HU	lipopolysaccharide heptosyltransferase II					-
Azotobacter vinelandii DJ	Bacteria; Proteobacteria; Gammaproteobacteria	NC_012560	960378	960700	0	1	2	cytochrome b561 family protein	dioxygenase					-
Azotobacter vinelandii DJ	Bacteria; Proteobacteria; Gammaproteobacteria	NC_012560	3602114	3602339	0	1	3	hypothetical protein	hypothetical protein					-
Beutenbergia cavernae DSM 12333	Bacteria; Actinobacteria; Actinobacteridae	NC_012669	297682	298426	0	1	2	uracil-xanthine permease	Inosine/uridine-preferring nucleoside hydrolase					-
Geobacillus sp. WCH70	Bacteria; Firmicutes; Bacillales	NC_012793	1896116	1896382	0	4	1	protein of unknown function UPF0236	major facilitator superfamily MFS_1					-
Dickeya dadantii Ech703	Bacteria; Proteobacteria; Gammaproteobacteria	NC_012880	3937804	3938270	0	1	1	malate dehydrogenase	arginine repressor					-
Dickeya zeae Ech1591	Bacteria; Proteobacteria; Gammaproteobacteria	NC_012912	3641686	3642456	0	2	1	dinucleoside polyphosphate hydrolase	DNA mismatch repair protein					-
Pectobacterium carotovorum subsp. carotovorum PC1	Bacteria; Proteobacteria; Gammaproteobacteria	NC_012917	3877211	3877447	0	1	1	hypothetical protein	Opacity-associated protein A					-
Dyadobacter fermentans DSM 18053	Bacteria; Bacteroidetes; Cytophagia	NC_013037	4562540	4563432	0	4	3	pentapeptide repeat protein	hypothetical protein					-
Actinosynnema mirum DSM 43827	Bacteria; Actinobacteria; Actinobacteridae	NC_013093	2765352	2766686	0	7	1	hypothetical protein	hypothetical protein					-
Saccharomonospora viridis DSM 43017	Bacteria; Actinobacteria; Actinobacteridae	NC_013159	1893	2761	0	4	3	chromosomal replication initiation protein	DNA polymerase III subunit beta					-
Cyanothece sp. PCC 8802	Bacteria; Cyanobacteria; Chroococcales	NC_013161	1069629	1070709	0	2	2	DNA polymerase III subunit beta	ABC transporter related					-
Cyanothece sp. PCC 8802	Bacteria; Cyanobacteria; Chroococcales	NC_013161	1827583	1827681	0	1	2	tRNA-Gly	hypothetical protein					-
Cyanothece sp. PCC 8802	Bacteria; Cyanobacteria; Chroococcales	NC_013161	3455379	3455638	0	1	1	F0F1 ATP synthase subunit C	F0F1 ATP synthase subunit A					-
Slackia heliotrinireducens DSM 20476	Bacteria; Actinobacteria; Coriobacteridae	NC_013165	565967	566174	0	2	2	transcriptional regulator, BadM/Rrf2 family	cysteine synthase A					-
Slackia heliotrinireducens DSM 20476	Bacteria; Actinobacteria; Coriobacteridae	NC_013165	942889	943227	0	1	1	L-threonine aldolase	SSU ribosomal protein S2P					-
Slackia heliotrinireducens DSM 20476	Bacteria; Actinobacteria; Coriobacteridae	NC_013165	2545936	2546327	0	1	1	Transglutaminase-like superfamily protein	hypothetical protein					-
Desulfomicrobium baculatum DSM 4028	Bacteria; Proteobacteria; Deltaproteobacteria	NC_013173	1096388	1096824	0	1	1	histone family protein DNA-binding protein	Radical SAM domain protein					-
Desulfomicrobium baculatum DSM 4028	Bacteria; Proteobacteria; Deltaproteobacteria	NC_013173	1415521	1416543	0	1	3	transcriptional regulator, MucR family	hypothetical protein					-
Desulfomicrobium baculatum DSM 4028	Bacteria; Proteobacteria; Deltaproteobacteria	NC_013173	2201462	2201884	0	1	2	hypothetical protein	pseudogene					-
Halomicrobium mukohataei DSM 12286	Archaea; Euryarchaeota; Halobacteria	NC_013202	1062075	1062695	0	2	1	branched-chain amino acid aminotransferase	hypothetical protein					-
Eggerthella lenta DSM 2243	Bacteria; Actinobacteria; Coriobacteridae	NC_013204	1676872	1677063	0	2	1	branched-chain amino acid transport	ribosomal protein L19					-
Eggerthella lenta DSM 2243	Bacteria; Actinobacteria; Coriobacteridae	NC_013204	2057358	2057519	0	1	1	tRNA-Val	tRNA-Gly					-
Alicyclobacillus acidocaldarius subsp. acidocaldarius DSM 446	Bacteria; Firmicutes; Bacillales	NC_013205	175443	175637	0	1	1	acyl-CoA dehydrogenase domain protein	short-chain dehydrogenase/reductase SDR					-
Alicyclobacillus acidocaldarius subsp. acidocaldarius DSM 446	Bacteria; Firmicutes; Bacillales	NC_013205	662471	662534	0	1	1	hypothetical protein	AIG2 family protein					-
Alicyclobacillus acidocaldarius subsp. acidocaldarius DSM 446	Bacteria; Firmicutes; Bacillales	NC_013205	1176060	1176218	0	1	1	transcriptional regulator, ArsR family	pseudogene					-
Alicyclobacillus acidocaldarius subsp. acidocaldarius DSM 446	Bacteria; Firmicutes; Bacillales	NC_013205	1897164	1897305	0	1	1	trigger factor	tRNA-Arg					-
Alicyclobacillus acidocaldarius subsp. acidocaldarius DSM 446	Bacteria; Firmicutes; Bacillales	NC_013205	2730054	2730891	0	3	3	CRISPR-associated helicase Cas3	CRISPR-associated protein Cas2					-
Ammonifex degensii KC4	Bacteria; Firmicutes; Clostridia	NC_013385	1223519	1223602	0	4	1	RNA-binding protein, predicted	sodium/hydrogen exchanger					-
Pectobacterium wasabiae WPP163	Bacteria; Proteobacteria; Gammaproteobacteria	NC_013421	3217422	3218217	0	4	1	excinuclease ABC subunit B	pseudogene					-
Vibrio sp. Ex25	Bacteria; Proteobacteria; Gammaproteobacteria	NC_013456	1102161	1102530	0	2	1	membrane protein	tyrosyl-tRNA synthetase					-
Vibrio sp. Ex25	Bacteria; Proteobacteria; Gammaproteobacteria	NC_013456	2147981	2148269	0	1	1	GGDEF family protein	hypothetical protein					-
Vibrio sp. Ex25	Bacteria; Proteobacteria; Gammaproteobacteria	NC_013456	2556371	2556831	0	1	1	cytochrome d ubiquinol oxidase subunit I	holliday junction DNA helicase RuvB					-
Vibrio sp. Ex25	Bacteria; Proteobacteria; Gammaproteobacteria	NC_013456	3259116	16	0	4	2	probable low-affinity inorganic phosphate transporter	hypothetical protein					-
Thermomonospora curvata DSM 43183	Bacteria; Actinobacteria; Actinobacteridae	NC_013510	2227	2866	0	2	4	chromosomal replication initiator protein DnaA	DNA polymerase III, beta subunit					-
Thermomonospora curvata DSM 43183	Bacteria; Actinobacteria; Actinobacteridae	NC_013510	819639	820014	0	3	2	hypothetical protein	hypothetical protein					-
Sebaldella termitidis ATCC 33386	Bacteria; Fusobacteria; Fusobacteriales	NC_013517	209463	209627	0	2	1	hypothetical protein	ATP synthase I					-
Sebaldella termitidis ATCC 33386	Bacteria; Fusobacteria; Fusobacteriales	NC_013517	572424	572726	0	1	3	hypothetical protein	hypothetical protein					-
Sebaldella termitidis ATCC 33386	Bacteria; Fusobacteria; Fusobacteriales	NC_013517	1820467	1820743	0	1	2	histidinol phosphate phosphatase HisJ family	transcriptional regulator, TetR family					-
Thermanaerovibrio acidaminovorans DSM 6589	Bacteria; Synergistetes; Synergistia	NC_013522	945874	945981	0	1	2	exodeoxyribonuclease VII, small subunit	ribosomal protein L28					-
Thermobaculum terrenum ATCC BAA-798	Bacteria; Thermobaculum.	NC_013526	606541	606721	0	4	1	binding-protein-dependent transport systems inner membrane component	Alkylglycerone-phosphate synthase					-
Dehalococcoides sp. VS	Bacteria; Chloroflexi; Dehalococcoidetes	NC_013552	387760	387811	0	1	2	hypothetical protein	prephenate dehydrogenase					-
Dehalococcoides sp. VS	Bacteria; Chloroflexi; Dehalococcoidetes	NC_013552	971959	972086	0	1	2	ribosomal protein L28	DAK2 domain protein					-
Dehalococcoides sp. VS	Bacteria; Chloroflexi; Dehalococcoidetes	NC_013552	1176898	1177021	0	1	2	transcriptional regulator, Fur family	ssrA binding protein (smpB)					-
Dehalococcoides sp. VS	Bacteria; Chloroflexi; Dehalococcoidetes	NC_013552	1347400	1347626	0	1	3	hypothetical protein	hydrogenase, HycG subunit					-
Meiothermus ruber DSM 1279	Bacteria; Deinococcus-Thermus; Deinococci	NC_013946	589200	589344	0	1	1	hypothetical protein	GntR family transcriptional regulator					-
Stackebrandtia nassauensis DSM 44728	Bacteria; Actinobacteria; Actinobacteridae	NC_013947	1765	2245	0	1	4	chromosomal replication initiator protein DnaA	DNA polymerase III subunit beta					-
Planctomyces limnophilus DSM 3776	Bacteria; Planctomycetes; Planctomycetacia	NC_014148	2514374	2514810	0	1	1	dihydropteroate synthase	hypothetical protein					-
Brachyspira murdochii DSM 12563	Bacteria; Spirochaetes; Spirochaetales	NC_014150	2022343	2022638	0	2	1	pyruvate/ketoisovalerate oxidoreductase, gamma subunit	methyl-accepting chemotaxis sensory transducer					-
Brachyspira murdochii DSM 12563	Bacteria; Spirochaetes; Spirochaetales	NC_014150	2376303	2376620	0	1	2	hypothetical protein	ApbE family lipoprotein					-
Brachyspira murdochii DSM 12563	Bacteria; Spirochaetes; Spirochaetales	NC_014150	2691777	2691970	0	2	1	NADPH-dependent FMN reductase	Protein-disulfide reductase					-
Brachyspira murdochii DSM 12563	Bacteria; Spirochaetes; Spirochaetales	NC_014150	2784273	2784551	0	3	1	transcriptional regulator, Crp/Fnr family	SSS sodium solute transporter superfamily					-
Brachyspira murdochii DSM 12563	Bacteria; Spirochaetes; Spirochaetales	NC_014150	2920956	2921298	0	4	2	hypothetical protein	protein of unknown function DUF534					-
Brachyspira murdochii DSM 12563	Bacteria; Spirochaetes; Spirochaetales	NC_014150	3037813	3038013	0	2	2	hypothetical protein	hypothetical protein					-
