# Supplementary material for: A vast collection of microbial genes that are toxic to bacteria
Source: HighWire-hosted journal article supplement (doi:10.1101/gr.133850.111), 2012-02-01
Supplement: TableS5.xlsx [file TableS5.xlsx]

## Sheet: Sheet1
Cluster_ID	Cluster_size	sRNA Annotation	Predicted RNA folding of a representative cluster member	Cluster_members
1	7	Validated tsRNA1	....(((((((((...))))))))).............((((((..........))))))..(((((((((((...))))))))))).....	NC_007434_3740106-3740197- NC_008390_645857-645948+ NC_009076_3330849-3330940- NC_010551_676623-676714+ NC_010622_2885239-2885328- NC_003295_527074-527187+ NC_010682_391353-391464+
2	6	Validated tsRNA2	.......((((((((......))))))))...((((((((......)))))))).......	NC_010681_4130885-4130984- NC_007951_4570493-4570553- NC_008542_351985-352044+ NC_010508_319934-319993+ NC_010551_273177-273236+ NC_008060_3074604-3074662-
3	11	Validated tsRNA3	.......((((((((.......))))))))..(((((((((((((...))).)))))))))).....	NC_007951_4875500-4875595+ NC_008060_2791669-2791762+ NC_010508_3522505-3522598+ NC_008785_2817874-2817963+ NC_008836_2277150-2277239- NC_009080_2266817-2266906- NC_009080_2285344-2285433- NC_010622_3468430-3468511+ NC_007651_89266-89343- NC_008390_3546030-3546096+ NC_010551_3433332-3433398+
4	4		.......(((((((......)))))))...((((((((......)))))))).....	NC_008543_1713535-1713591+ NC_010515_2716691-2716747- NC_010086_942451-942506- NC_010552_1691573-1691628+
5	13	prrF (known sRNA)	...((((((....))))))(((((((.(((((((.((.((...)).)).))).)))).))))).(((....)))........)).....((((((((.....)))))))).......	NC_008463_5555926-5556042+ NC_009656_5586091-5586207+ NC_009656_5586304-5586419+ NC_010501_826968-827083- NC_009439_1126631-1126745- NC_007492_4145145-4145258+ NC_008463_5556138-5556251+ NC_009512_5089173-5089286+ NC_010322_5234056-5234169+ NC_002947_4595237-4595349+ NC_009512_2024401-2024513- NC_002947_5325416-5325526+ NC_010322_4082247-4082357+
6	3		...(((((..((((((((........((.((((((((.((((...(((.......)))....)))).)))....))))).))....((((((((....((((......(((((((..........((((((.............))))))..........(((((((((((...(((.(((......))).)))))))))))))).)))))))..))))((......)).....))))))))((((........))))...))))))))...........(((((.........(((((.....((((.((((.........)))))))).....)))))........))))).........)))))............((((((((((......))))…	NC_006274_613739-614148- NC_005945_626147-626506- NC_007530_626104-626463-
7	3	ryhB (known sRNA)	........((((((((((.((((((((.(((.......))).)))))))).))).....)))))))((((........)))).....((((.....))))(((((((.....)))))))........	NC_009665_5147481-5147607+ NC_011663_5063149-5063275+ NC_008700_142638-142752-
8	3		.....((((((((....)))))))).............((((((((.......)))))))).........	NC_003295_3651827-3651896+ NC_010682_3765429-3765493+ NC_012856_3455337-3455401+
9	3		.......((((((......))))))....(((((((((((...)))))))))))	NC_010682_3765028-3765086+ NC_012856_3454936-3454994+ NC_003295_3651444-3651497+
10	2		((((.((((((((....(((....((((((((((((.(((((.(((((......(((((((....)))))))......((.((((....)))).)).))))))))))..)))))((....)).........))))))).......(((..(((((((.(((((((((.....))))))))).))))))))))...))).....))))).))).)))).(((((((((((((....))))))))))))).	NC_013552_1121666-1121914- NC_002936_1297576-1297757-
11	2		...((((((....)).))))..((((((........)))))).((((((((.((((((......))))))))))).)))...((((...(((((((..(((.(((((....((((.((((((((((((((..((....))..)))).)))....))))))).)).))....))))))))((((....)))))))).)))...))))((((((((((((......)))))))))))).	NC_008785_585235-585471+ NC_009076_943690-943926+
12	2		.....(((((((.(((..((((....))))..)))))))))).......((((((((...(((...(((((((((((((.....))))..))).(((((((..((........(((....))).(((((((((.((...((((.......))))..)))).)))))))))..)))))))...)))))))))...))))))))......((((((((....))))))))	CP001637_2121110-2121337+ NC_010658_1720115-1720342-
13	2		...................................(((((((....((((((((((((.(((............................))))))))))).))))...((((((((((((((((....))))))))).)))))))......)))))))................(((((((((((((.........).))))))))))))..	NC_011658_1305537-1305749- NC_011772_1192640-1192822-
14	2		..............(((((.((((.(((...((((((((((...))))......)))))))))))))............((((((......)))))).)))))..(((((((((((((.....)))))))))))))....	NC_010184_111875-112014+ NC_005945_106311-106448+
15	2		.((((((...(((((((((....)))))))))...))))))...	NC_011094_1316306-1316349- NC_011149_1863779-1863822+
16	2		..(((((((((((.....))))))))))).........	NC_011146_291066-291104+ NC_007517_34270-34306+
17	2		((((((...))))))........	NC_005957_409634-409656- NC_006274_402104-402126-
